# Supplementary material
Source: publisher figshare collection journal article supplement (https://gsajournals.figshare.com/articles/dataset/_/5984860)
Supplement: Supplementary file 1 [file 1]

## Sheet: Peanut_infectionVScontrol
DE_genes	S_C_16	S_C_32	S_C_64	S_16	S_32	S_64	R_C_16	R_C_32	R_C_64	R_16	R_32	R_64
Aradu.00KTA	0.112357	0.51616	-1.1929	0.141938	-1.01474	-1.57885	0.902893	0.519538	0.888603	0.456142	0.211525	0.260011
Aradu.00SPE	-0.453915	0.614096	0.251037	-0.0170283	-0.802112	-0.394862	0.453428	-0.377133	0.642214	0.0704947	0.683132	-0.462869
Aradu.00U6W	-1.00487	0.886521	-0.390386	-0.164106	-0.0125421	0.480383	-0.706681	-1.09197	-0.238791	-0.111762	0.863078	0.272472
Aradu.011B8	0.577708	-0.157876	0.181868	0.460743	-0.0257455	0.34155	0.389127	-1.19941	-0.305586	0.613386	0.380654	-0.99288
Aradu.01CF0	0.46687	1.26721	1.11159	0.515918	-0.39393	-0.992366	-0.398015	-0.307616	0.373928	-0.566018	-0.164763	-0.0354762
Aradu.01KBI	1.1504	-0.400241	-0.81946	1.42431	0.852327	0.253618	0.0494958	-0.679921	-0.444883	0.383784	-0.726604	-1.59742
Aradu.0252U	0.551927	-0.647173	-0.690418	1.49968	0.902393	-0.271634	0.310861	-0.199612	-0.85315	0.343386	-0.679661	-0.583718
Aradu.0291B	0.655094	-0.539841	-0.940326	0.508216	0.821444	-0.491968	0.0604809	1.06756	-0.797386	-0.112645	-0.348588	-1.0695
Aradu.02GMF	-0.421964	1.43418	0.438288	-0.465985	-0.805026	-0.474323	-0.106844	0.60195	0.475291	-0.634987	0.251488	0.482656
Aradu.02HPB	0.571625	-0.973725	-0.3322	0.594562	1.10467	0.215509	0.0678658	-0.537226	-0.509978	0.083127	-0.0497224	-0.245614
Aradu.02NN3	-0.675743	0.216121	-0.000806382	-0.560117	0.353278	0.716754	-0.520923	-0.899947	-0.0924816	-0.53845	0.800058	0.871328
Aradu.02RAJ	1.45011	-0.341298	-1.10959	1.22333	0.842088	-0.11932	0.162713	-0.367616	-0.39232	0.65611	-0.692606	-1.3124
Aradu.02TFB	0.262293	-0.760236	-0.760236	1.03999	0.561924	-0.397801	0.389936	-0.590946	-0.539351	1.08895	-0.665169	-0.428812
Aradu.04BLT	-0.448668	0.58963	-1.49384	0.132561	-0.596202	-0.681819	-0.135961	-0.0300036	0.244684	-0.0637767	0.873751	0.78968
Aradu.04GXY	-0.315397	1.19308	1.4374	-0.131308	-0.755389	-0.747424	0.835961	-0.403325	-0.0654107	-0.0843143	-0.233807	-0.0980189
Aradu.0510X	0.998153	-0.267258	-0.928399	1.31565	0.959164	-0.776235	-0.0351575	0.429772	-0.995227	0.144563	-0.609362	-0.614463
Aradu.05DT4	0.943979	-0.945096	-1.21239	1.2103	0.91923	0.0907827	0.876115	-0.340592	-0.918688	0.699892	-0.559369	-1.06517
Aradu.05MVI	-0.499031	0.195594	1.09714	-0.683857	-0.708157	0.562264	-0.397541	-0.493172	0.125476	-0.392361	0.45527	0.551038
Aradu.05XZ1	0.110267	1.38095	0.818049	-0.647042	-0.28824	-0.608107	0.174434	0.238761	0.320788	-0.289947	0.0513594	-0.361428
Aradu.068JX	-0.248036	1.00494	1.16884	0.33035	-0.665655	-0.471474	0.305926	-0.473724	0.074242	-0.0964075	0.189326	-0.284889
Aradu.06H1M	-0.342253	0.475823	1.77645	-0.136539	-0.250522	-0.137813	0.691296	-1.12329	-0.740844	-0.244496	0.0259353	0.0679694
Aradu.06LP9	0.853691	-0.766337	-1.10724	0.286862	0.523643	-0.427284	0.134321	0.76654	-0.0399877	0.15478	-0.181909	-1.03418
Aradu.06XCL	-0.473621	0.808713	1.08414	-0.500262	-0.606508	-0.0951606	-0.112618	0.252107	0.590039	-0.715151	0.206068	-0.260603
Aradu.073JP	-1.22131	0.891336	0.555174	-0.362532	-0.40331	-0.388189	0.514575	-0.432669	0.479627	0.0660378	0.223087	0.355776
Aradu.07ZWB	0.11009	1.39344	0.566537	0.502089	-0.151999	-0.466636	0.178791	-0.561077	0.39401	-0.0284515	-0.586034	-0.203537
Aradu.0992L	1.09256	-0.25481	-1.26951	0.852185	0.756313	-0.906076	0.533479	0.579445	-0.283519	0.735425	-0.506857	-1.14832
Aradu.09QQW	0.0235277	-0.146737	-0.681635	0.7841	0.454617	-0.163124	1.09345	0.808731	-0.650471	0.49256	-0.845785	-0.516843
Aradu.09RWH	-0.314182	0.768865	0.342098	-0.881135	-0.836923	-0.45945	0.18564	0.370334	1.05909	-0.168109	0.311249	-0.173037
Aradu.0AD0I	1.41977	-0.524471	-0.781069	1.48684	1.19183	-0.781069	0.180537	-0.165209	-0.781069	0.35458	-0.601286	-0.681786
Aradu.0AS12	0.786285	-0.742259	-0.986473	0.374085	1.23545	-0.00785229	0.16679	0.375029	-0.562409	0.371209	-0.428873	-1.20146
Aradu.0B375	0.235218	1.14856	0.543953	0.533457	-0.724178	-1.13196	0.352556	-0.106682	0.426372	0.00678353	-0.0233063	-0.163965
Aradu.0DS3V	1.34023	-0.760797	-1.29108	0.929903	0.924433	-0.149736	0.367604	0.343108	-0.880705	0.53312	-0.385558	-1.03511
Aradu.0FH1C	1.14543	-1.00924	-1.21745	1.12793	1.007	-0.231302	-0.177188	0.38088	-0.550387	0.762798	-0.155928	-1.06555
Aradu.0G0TP	-1.00394	0.989462	0.559927	-0.803819	-1.15132	-1.07609	0.578837	0.501498	0.621887	-0.161518	0.0886381	0.459802
Aradu.0G8DQ	-0.077002	0.605264	-0.721283	0.290172	-0.727504	-0.832535	0.851766	0.0626659	0.349913	0.623179	0.384928	0.521895
Aradu.0GK1P	-0.586049	0.843471	0.489411	-0.845822	-1.13645	-1.00102	0.665782	0.333835	0.977801	-0.0480821	0.436074	0.414989
Aradu.0H2L9	0.413244	-0.995133	-1.03645	0.77049	0.796376	0.135535	0.609424	-0.120597	-0.871047	0.495077	-0.600543	-0.653836
Aradu.0H53T	-0.440302	0.595368	0.401324	-0.916903	-0.312682	0.214124	0.220373	-0.648407	-0.115166	-0.269076	0.318167	0.133261
Aradu.0HM6U	-0.0520246	1.11986	0.243145	-0.329012	-0.798859	-1.12359	0.324432	0.367265	0.763292	-0.470478	0.269308	0.233419
Aradu.0KG04	0.735247	-0.778542	-0.757761	0.838478	1.1729	0.130122	-0.374507	0.388301	-0.709056	0.282174	-0.450843	-0.837959
Aradu.0KH4T	-0.103852	1.93137	1.39123	-0.730794	-0.185751	0.267291	-0.953764	0.44717	0.0438158	-1.00263	-0.252671	0.0891075
Aradu.0L0BV	0.30176	-0.530913	-1.20287	0.500111	0.819091	-0.0405231	-0.454025	0.652411	-0.640107	0.715749	-0.310865	-0.600553
Aradu.0L20U	1.33388	-0.201355	-1.05937	1.16044	0.599108	-0.31074	-0.110188	0.440151	-0.683399	0.539511	-0.530576	-0.73868
Aradu.0N518	0.797897	-0.378568	-0.477519	1.22271	0.782123	-0.101831	0.844112	-0.404937	-1.00332	0.123723	-0.843183	-0.649636
Aradu.0NY83	-0.719275	0.0779109	0.453567	0.0518165	-0.563742	0.881846	0.57643	-1.43362	0.0307688	0.127381	0.426165	0.276813
Aradu.0Q16W	-1.11277	0.687943	0.916974	-0.76135	-0.786626	-0.722712	0.118868	0.149291	0.702778	-0.0113733	0.656796	0.166278
Aradu.0QP9J	1.52236	-0.012023	-0.455847	0.479523	1.18313	-0.440347	-0.319279	0.0143398	-0.339952	0.00171878	-0.529529	-0.621138
Aradu.0R9W1	1.36018	-0.976581	-0.250328	1.50912	0.344083	-0.701689	-0.436751	0.190275	-0.500813	-0.0655485	-0.228391	-0.872164
Aradu.0SM3T	1.46329	-0.421589	-0.88091	1.5338	1.33435	0.156154	-0.0905026	-0.518499	-0.908069	-0.264843	-0.758748	-0.900803
Aradu.0T5YP	0.739966	-0.397253	-0.304403	1.3725	0.61683	-0.882484	0.131669	0.488754	-0.676236	0.93585	-0.68328	-0.903717
Aradu.0T6MF	0.716995	-1.76519	-1.34008	0.926203	0.813601	-0.408314	0.504055	0.346748	0.080767	0.549751	0.238258	-1.09342
Aradu.0TS71	1.45418	-0.493684	-0.738085	1.29182	0.682837	-0.428439	-0.202951	-0.0071795	-0.569859	0.586163	-0.677751	-1.04688
Aradu.0U66V	1.15242	-0.579844	-0.839066	1.53521	1.02095	0.0794074	-0.107978	-0.720182	-0.964128	0.422187	-0.656138	-0.860962
Aradu.0UW7J	1.24371	-0.0904315	-1.0954	1.10355	1.0115	-0.178176	-0.0214251	0.267911	-0.773639	0.222859	-0.939688	-0.645244
Aradu.0V9QN	1.35827	-0.67695	-1.04045	1.19744	0.965001	-0.0104992	0.0969915	0.287907	-0.833495	0.31916	-0.5931	-0.911626
Aradu.0XX6X	0.00182149	1.09317	0.123214	-0.115772	-0.655544	-1.24132	-0.0492826	0.142246	0.794977	-0.276819	0.0542286	0.859975
Aradu.0XZ7N	0.316252	1.0226	-0.125484	0.645865	-0.432267	-1.19591	0.486968	-0.102758	0.395131	0.393674	-0.0383619	-0.289334
Aradu.0YR92	-0.819605	1.05566	0.752124	-0.718386	-1.11459	-0.549303	0.179765	0.265957	0.689291	-0.345026	0.311686	0.719499
Aradu.0Z5GQ	-0.257491	1.30631	1.59823	-0.522079	-0.703589	0.356546	-0.612199	-0.666469	0.180921	-0.787026	0.274	0.284977
Aradu.0ZG9F	0.264257	-0.564817	-0.701173	1.05622	0.663986	-0.242938	-0.23078	-0.336997	-0.651389	0.546663	-0.555453	-0.563369
Aradu.10BGT	-0.0200664	0.995885	1.11579	0.25731	-0.541892	-0.550478	-0.094977	-0.78143	0.739886	0.0353993	0.216168	-0.292843
Aradu.10ESY	-0.466766	0.0878736	0.802553	-0.923095	-0.318083	0.3615	0.149566	-0.922434	0.94097	0.0567975	0.227741	-0.477425
Aradu.10XKC	0.192093	0.572491	0.270349	0.641685	-0.980015	-0.716005	0.625778	-0.951376	0.127238	0.523492	0.154555	0.0405101
Aradu.10YCG	0.510364	-0.666838	-0.85053	0.724002	0.766939	-0.206521	-0.241306	0.192218	-0.546486	0.300289	-0.344432	-0.767805
Aradu.11E6F	0.308282	0.798147	0.716501	0.226172	-0.305147	-0.704516	-0.101543	-0.427296	0.121638	-0.194337	0.147232	-0.0814924
Aradu.11KLZ	1.16348	0.174533	-1.12641	0.558706	0.914419	-0.27565	-0.277103	0.84891	-0.11563	0.704773	-0.454785	-0.958383
Aradu.12CJQ	-0.653796	0.0149627	-0.0767756	-0.384816	-0.50346	-0.122489	0.170602	-0.829204	0.307873	0.369881	1.02842	0.456108
Aradu.12SP2	-0.257764	0.947796	0.636362	-0.482908	0.113235	0.613384	-0.175298	-0.786353	-0.278691	-1.17269	0.369522	0.571376
Aradu.130HL	0.646101	-0.580426	-0.487766	-1.1501	0.580719	-0.0369803	0.977949	0.621995	0.0936023	-0.162371	0.441938	-1.00702
Aradu.131HS	-1.05198	0.908103	0.510594	-0.92466	-0.939522	-0.928529	0.442301	0.791264	0.852364	-0.0357956	0.32524	0.805239
Aradu.13Y5Y	0.00526222	1.08076	-0.014928	-0.250279	-0.619703	-0.434199	0.0273283	-0.768164	0.265088	0.217315	0.303409	0.331072
Aradu.142E0	-1.1567	-0.0503319	-0.541507	0.878358	-0.182124	0.48236	-0.0530819	-0.502918	-0.288904	0.307902	0.213528	0.757951
Aradu.142WQ	0.81302	0.595625	0.0823854	0.45469	0.580649	-0.937134	-0.0505097	-1.3263	-0.0470803	-0.0945365	0.144602	-0.619672
Aradu.145AN	-0.599575	1.15713	1.41515	-0.69068	-0.637435	-0.501109	-0.0769769	0.247083	0.553574	-0.48065	0.080528	0.277229
Aradu.14QL4	1.41879	-0.426166	-0.706801	0.380637	1.38163	0.419101	-0.637036	-0.284013	-0.637478	0.365872	-0.558625	-0.751865
Aradu.14TMT	1.33819	-0.483952	-0.955593	1.46029	0.850967	-0.559706	0.640362	-0.274281	-0.7785	0.575125	-0.646	-1.14161
Aradu.155T3	1.08754	-0.333816	-0.564182	1.34836	0.652627	-0.155735	0.270918	0.126602	-1.55959	0.297252	-0.742704	-0.482364
Aradu.15RGK	1.46744	-0.709639	-0.517528	1.37572	1.07497	-0.324476	0.12022	0.051781	-0.589858	-0.0425257	-0.732715	-1.13193
Aradu.15WFY	0.129641	-0.154577	-0.0528233	-0.41461	0.632856	0.493712	-0.741271	-0.644089	-0.371149	-0.622225	0.255147	0.589788
Aradu.15WKB	1.19445	-0.790298	-1.42067	1.19259	1.07502	-0.00278468	0.397319	-0.08107	-0.749309	0.48482	-0.436428	-0.933553
Aradu.16883	0.0387144	-1.11332	-0.304491	1.14667	0.663587	0.153638	0.780128	-0.395743	-0.677793	0.619452	-0.290713	-0.593385
Aradu.16RQU	0.899626	-0.451048	-1.15412	1.10944	1.11982	-0.0505998	-0.181902	-0.26768	-0.258402	0.375032	-0.727388	-0.818272
Aradu.17DUP	-0.22108	1.11302	0.899592	-0.208403	-0.831817	-0.810828	-0.0291481	0.255613	0.777596	-0.662521	0.30144	-0.77518
Aradu.17HPD	1.05849	-0.723837	-1.15311	1.26836	0.972443	-0.463005	-0.0380197	0.185125	-0.413492	0.714985	-0.441264	-0.781179
Aradu.17YTA	-0.98103	1.11461	-0.0732535	-0.652811	-0.652177	-0.343376	0.862169	0.68515	0.928394	0.107653	0.143823	0.0240139
Aradu.18FWJ	0.568368	-0.762398	-0.889474	1.12227	0.948746	-0.156754	0.602882	-0.33108	-0.686683	1.11546	-0.53849	-1.12733
Aradu.18W20	0.800862	-0.710438	-0.871157	1.07316	1.17415	-0.617634	-0.470903	-0.408298	-0.323489	0.614037	-0.459873	-1.08247
Aradu.199XC	-0.183256	0.138466	1.2132	0.243262	-0.579389	-0.406038	0.212356	-0.820266	-0.0589714	0.195734	0.116653	-0.124386
Aradu.19F6X	-1.21764	1.11264	0.621149	-1.04309	-0.391755	0.493933	0.26501	0.198197	0.00266914	-0.49324	0.500712	0.0113042
Aradu.1A8NN	0.531592	-0.630186	-1.34459	0.952991	0.803866	-0.661463	0.547476	0.366243	-0.125816	0.867084	-0.201852	-1.17974
Aradu.1A8QK	0.0772156	-0.291295	-0.886477	-0.164784	-0.0784352	-0.338952	-0.21147	-0.659942	-0.139458	0.229758	0.53149	0.977703
Aradu.1AJ1T	0.236463	-0.18841	0.990251	0.520185	-0.430438	-0.263378	-0.0202537	-1.09887	-0.0914008	-0.0647229	0.0959073	0.0459759
Aradu.1BA76	1.42405	-0.706099	-0.661084	1.61163	0.820057	-0.529733	0.237174	-0.136882	-0.757039	0.397016	-0.655572	-1.12596
Aradu.1CN3T	-0.690226	1.17822	0.953384	-0.588047	-1.04575	-0.895374	0.281551	0.541402	0.779348	-0.0964864	0.157215	0.348174
Aradu.1D3EG	-1.06365	1.09918	0.457733	-1.06437	-1.06901	-0.361101	0.469521	0.198895	0.863819	-0.0848609	0.431916	0.525627
Aradu.1D4P2	1.02919	-0.712328	-0.591223	1.07418	0.773931	-0.41965	-0.291706	0.217744	-0.789984	0.442281	-0.680295	-0.97677
Aradu.1E5BI	-0.074729	0.609811	0.595067	0.090251	-0.100718	0.0762736	0.563148	-1.10472	0.182362	-0.339639	0.0401255	-0.0409942
Aradu.1F737	0.630677	-0.596161	-0.906225	0.909554	1.32722	0.255959	-0.67803	-0.333909	-0.687673	0.39272	-0.762353	-0.626769
Aradu.1I2B8	1.14931	0.0513615	-0.973465	1.11776	0.901943	-0.365508	0.0995672	0.629177	-0.663117	0.571782	-0.642756	-1.09853
Aradu.1IB0M	-0.284421	0.811303	1.21754	-0.308543	-0.119674	-0.342958	-0.104891	-0.59928	0.358158	-0.36943	0.339768	-0.301165
Aradu.1JQ3A	1.30963	-0.476344	-0.758307	0.706289	1.71506	-0.374131	-0.631122	-0.433467	-0.646312	0.160309	-0.496505	-0.684465
Aradu.1K9RY	-0.172173	1.37605	0.57068	-0.33797	-0.165727	-0.0664303	-0.174706	-0.275219	0.464163	-0.317663	0.145302	-0.0458258
Aradu.1KH61	-0.731537	-0.512526	-0.556698	-0.710698	-0.497063	-0.0226487	0.551851	-0.487347	0.20496	0.412773	1.08879	1.24178
Aradu.1L0UP	0.0290586	0.846164	0.700854	0.182089	-0.50535	-0.752091	0.108621	-0.552132	0.121741	0.211626	0.232344	-0.213298
Aradu.1L6HR	0.927822	-0.400509	-0.886895	1.29097	0.763044	-0.370122	0.118093	-0.414455	-0.633748	0.441112	-0.653484	-0.954789
Aradu.1M0CG	-0.826391	0.761379	-0.546164	-0.399941	-0.0623898	-0.14292	0.428309	0.920415	0.048956	-0.344205	0.219242	0.0221829
Aradu.1M6IB	0.786232	-0.0131113	-0.912154	0.448226	1.1432	0.0790623	-0.491962	0.684606	-0.504517	0.232059	-0.67835	-1.20163
Aradu.1NH0N	-0.0189664	0.526747	0.899992	-0.0697855	-0.711916	-1.24937	0.203452	-0.483553	0.209104	-0.258909	0.50027	0.179503
Aradu.1P9QN	0.612865	0.751874	0.60672	0.521278	-0.720572	-0.349541	0.341992	-0.77916	-0.389535	-0.358017	0.0521241	0.375169
Aradu.1PF9A	-0.536544	0.084585	0.423365	-0.286686	-0.465871	-0.720003	0.595238	-0.546696	0.168654	-0.189689	1.01281	0.151136
Aradu.1PN83	-0.725664	1.3823	1.22247	-0.81933	-0.721176	-0.31645	-0.0193606	0.64399	0.458889	-0.746001	0.134936	0.381787
Aradu.1QZ3X	-0.665981	1.03287	1.02722	-1.03905	-1.19258	-0.802763	0.548191	0.123516	0.801028	-0.172488	0.372385	0.180219
Aradu.1RR29	0.579354	-0.753888	-0.593341	0.591779	0.644267	-0.353221	0.934047	-0.41229	-0.0674312	0.766522	-0.127661	-0.753888
Aradu.1S19J	-0.380671	1.04759	0.277501	-0.258613	-1.01742	-0.508598	0.0342381	0.170115	1.10214	0.0756741	0.380912	-0.313107
Aradu.1T2VN	-0.348164	1.20728	1.3769	-0.86804	-0.549441	-0.894392	-0.187643	0.824962	0.274231	-0.562947	0.333602	-0.30295
Aradu.1T8BP	-0.648884	0.52635	1.23817	-0.786535	-0.819273	-0.243209	-0.38423	-0.181533	0.408713	-0.358955	0.247805	0.50621
Aradu.1V1I5	0.123167	1.3636	1.19235	0.366609	0.0691974	-0.553555	0.697252	-0.910683	-0.582641	-0.43039	-0.233909	-0.163205
Aradu.1XR4F	-0.653406	1.11299	0.861176	-0.635747	-0.918385	-0.781489	0.505629	0.118344	0.849138	-4.97238e-05	0.394271	0.172549
Aradu.1YE7N	0.0197324	0.910865	0.673839	-0.727219	-0.269007	-0.540375	-0.5657	0.761665	0.503245	-0.629168	0.223054	-0.574353
Aradu.20IWY	0.986692	-0.423778	-0.906692	1.25337	1.20042	-0.490205	0.506569	0.206673	-1.03998	0.583046	-0.504146	-1.13198
Aradu.20PQI	-0.574092	0.958056	1.24043	-0.300823	-0.364058	0.672036	-0.471686	-1.23907	0.121679	-0.658829	0.42052	0.596715
Aradu.20QKH	-0.286846	0.908905	0.399759	-0.285298	-1.06924	-0.643707	0.611792	0.0203068	0.135663	-0.222322	0.407013	0.391358
Aradu.212BQ	0.449366	-0.852032	-1.16235	0.793758	1.02538	0.298186	0.638993	-0.82381	-0.757101	0.606217	-0.508311	-0.23053
Aradu.21EXI	0.577605	0.306621	-0.971247	-0.471621	0.46106	-0.0380859	0.153207	0.877126	-0.089008	0.173809	-0.762059	-0.158829
Aradu.22C3R	-0.90942	1.16379	0.454566	-0.712896	-1.05871	-0.851264	0.388453	0.53239	0.790932	-0.199093	0.0999642	1.26641
Aradu.22MJZ	0.925504	-0.156534	-1.3421	1.14268	1.07186	-0.406971	-0.0139466	0.122778	-0.456898	0.406085	-0.488586	-0.765247
Aradu.234X6	0.303089	-0.626927	-0.669649	1.11927	0.658212	-0.652572	1.07448	-0.0719196	-0.647297	0.761895	-0.534608	-0.731288
Aradu.23SXV	-0.256001	1.22346	0.432661	0.18086	-0.181981	-0.582994	-0.193471	-0.882972	0.536232	-0.0619983	0.727299	-0.528271
Aradu.2447B	0.861962	-0.509574	-0.678597	0.975642	1.06417	-0.455417	0.612574	-0.329472	-0.703561	0.158129	-0.906354	-0.383625
Aradu.2448N	0.0252315	0.528396	0.0470463	0.220239	-1.15938	-1.2976	1.03076	0.291608	0.554036	-0.12146	0.640135	-0.113592
Aradu.24FFM	0.447066	-0.716888	-0.716888	0.134589	0.571197	-0.0531273	0.142153	0.280202	-0.0976741	1.16332	-0.501098	-0.716888
Aradu.24I8J	0.64314	1.40096	1.00828	0.525427	-0.275607	-0.242562	0.158849	-0.826873	-0.0645156	-0.658994	-0.346279	-0.175608
Aradu.24LGE	-0.830532	0.828953	0.616992	-1.22134	-1.08812	-0.81327	0.438104	1.07888	0.826064	0.00962266	0.533357	0.243361
Aradu.262W4	0.863192	-1.20304	-1.46389	0.716457	0.714283	-0.566235	0.726435	0.368492	-0.314867	0.782521	-0.187317	-0.745588
Aradu.267PI	0.71676	-0.264992	-1.5758	0.448796	1.19138	-0.0639696	0.0677435	0.426294	-0.594199	0.403273	-0.456255	-0.585084
Aradu.270YY	1.11793	-0.802187	-0.327196	1.19345	1.02911	0.216161	-0.532094	-0.0186856	-0.733509	0.220455	-0.684223	-0.970996
Aradu.27C7S	0.359164	0.0936468	-0.079097	0.261294	0.747035	1.40774	-0.936892	-1.49206	-0.56366	-0.674092	0.363182	0.667809
Aradu.286YF	0.804204	0.0116572	-0.908032	0.879051	1.21605	-0.019006	0.307504	0.183813	-0.816601	0.272701	-0.972682	-0.979512
Aradu.296RJ	1.08911	-0.557864	-1.08082	1.23914	0.787003	-0.408363	0.377133	-0.0678541	-0.338398	0.769808	-0.516222	-1.31678
Aradu.29ET0	1.02221	-0.302023	-1.19705	1.40672	1.14581	-0.0993706	0.201659	-0.124344	-0.766336	0.336927	-0.317499	-1.23126
Aradu.2A7K0	-0.597076	1.46249	-0.568812	-0.235847	-0.520466	-1.1275	1.02132	0.311052	0.419904	0.394905	0.667069	-0.20433
Aradu.2B9UE	-0.480802	0.0713005	1.15482	0.0560783	-0.878197	-0.708272	0.151451	-0.413483	0.647069	0.0389338	0.154786	0.32225
Aradu.2BI4W	-0.582875	1.67498	0.396089	-0.874375	-0.918689	-0.778799	0.32372	0.70644	0.381343	-0.0482127	-0.235121	0.264639
Aradu.2EA4R	-0.313615	1.01516	0.878102	0.388381	-0.8409	-1.1027	0.257234	-0.455065	0.794807	0.031251	0.249849	-0.0792582
Aradu.2J762	-0.561859	1.36075	0.830999	-0.35448	-0.80268	-0.157111	-0.33506	-0.0539999	0.592152	-0.778584	0.0671868	0.443882
Aradu.2K11I	-0.457069	1.12994	1.0636	-0.379877	-0.995491	-0.432218	0.491565	-0.522874	0.635169	-0.0328057	0.180294	0.588156
Aradu.2K3I2	1.14566	-0.721965	-1.18117	1.14845	0.666956	-0.779445	0.646995	0.527725	-0.19717	0.832385	-0.516458	-1.38253
Aradu.2K88G	0.893014	-0.308791	-0.359413	0.5598	1.33188	-0.106069	-0.459517	0.852424	-0.986547	-0.315313	-0.473571	-0.910665
Aradu.2LH1B	-0.681923	0.883558	1.13197	-0.846969	-0.968665	-0.787479	0.111104	0.0262829	0.866804	-0.262544	0.327076	0.652251
Aradu.2M0W2	-0.543758	0.249033	0.25684	-0.468582	-0.620302	-0.304985	0.707345	-0.530865	0.391934	0.473267	0.614452	-0.171677
Aradu.2NG9A	-0.493667	1.42079	0.879301	-0.223646	-0.628768	-0.626032	0.409146	-0.38068	-0.274223	-0.321001	0.0856438	0.309808
Aradu.2Q2R1	1.19054	1.80401	1.0052	0.980585	-0.0780406	-0.587064	-0.0358806	-0.628649	-0.617055	-0.505442	-0.308168	-0.377036
Aradu.2RF5C	-1.15144	0.717089	0.0353958	-0.869488	-0.902587	-0.713617	0.416677	-0.122793	1.01122	0.0832099	0.274759	1.03521
Aradu.2RV29	-0.786373	-0.17907	-0.299188	-0.481548	-0.689485	0.821203	1.26781	-0.785785	-0.358062	0.449348	-0.116675	1.07367
Aradu.2SK6X	0.476703	1.29245	0.819619	0.396888	0.593582	0.903555	-0.122943	-1.12625	-1.30584	-1.00737	-0.605081	0.0660344
Aradu.2T5MG	-0.130189	0.704906	1.25589	-0.323283	-0.961087	0.129131	-0.415287	-0.610057	0.470597	-0.346699	0.184585	0.20309
Aradu.2U0G8	0.602784	-1.11248	-1.32562	0.503534	1.0812	0.358913	0.820968	-0.234935	-1.07684	0.527665	-0.24846	-0.797048
Aradu.2V08S	1.34663	0.00384546	-1.12913	1.2102	1.25741	-0.181134	-0.164361	0.190978	-0.708436	0.107247	-0.612784	-1.00559
Aradu.2V49U	0.41562	-0.690039	-0.671105	1.11734	0.517208	-0.596468	0.52318	-0.189418	-0.723802	0.842759	-0.415456	-0.627145
Aradu.2V8U8	0.968932	-0.454099	-0.726975	1.1797	0.503776	-0.601907	0.106473	0.609103	-0.416145	0.575481	-0.574808	-1.53549
Aradu.2X0TU	0.0801985	0.383308	0.708006	0.30646	-0.230336	-0.805833	-0.0895529	-0.945058	0.0969558	0.30809	0.155646	0.294218
Aradu.2XB95	0.776722	0.56143	-0.599908	0.380836	-0.930501	-0.360223	0.161386	-0.0528809	0.628709	-0.0919376	-0.256356	0.989534
Aradu.2Z92T	1.27906	-0.900579	-0.624693	0.894685	0.414749	-0.951787	0.433726	0.596856	-0.692117	0.385047	0.00816104	-1.16362
Aradu.2ZK8F	1.22491	-0.660179	-1.04098	1.06892	0.942952	-0.269651	0.103388	-0.220646	-0.827914	0.651564	-0.433152	-0.989097
Aradu.2ZP0Z	-0.196737	1.05986	1.73773	-0.587957	-0.51978	-0.254169	-0.362814	-0.485513	0.264978	-0.284688	-0.0378609	-0.467855
Aradu.2ZT9L	-1.21824	1.07996	0.329295	-0.091651	-1.14121	-0.055273	0.413772	-0.163892	0.412008	-0.140337	0.373077	0.550775
Aradu.30JD5	-0.81934	1.49587	0.102301	-0.699181	-0.206442	0.0836156	0.648646	-0.0928009	-0.520285	-0.381083	0.536804	0.0837601
Aradu.30K9R	0.280303	-0.436368	-0.436368	-0.0525133	0.433702	0.151856	0.0306913	-0.436368	0.529068	0.118772	0.553629	0.11305
Aradu.31ZWP	1.23787	-0.207971	-0.697496	1.07817	1.09276	-0.134765	-0.34551	0.280632	-0.799484	0.288385	-0.705259	-1.07651
Aradu.329DD	1.29709	-0.715967	-1.29116	1.1868	0.868052	-0.582324	0.132415	0.115919	-0.365528	0.634787	-0.298434	-1.36493
Aradu.32RQ0	0.0485357	-0.0567155	-0.631703	0.288842	0.851704	1.12649	-0.640704	-1.20116	-0.942181	-0.180914	0.22431	0.881022
Aradu.33XI8	-0.332251	1.34415	-0.951932	-0.0731996	-0.23685	-1.06621	0.661859	0.428493	0.210034	0.237179	0.254773	0.0132894
Aradu.33XZT	0.338866	-0.446045	-0.319816	-0.46221	-0.109112	-0.491527	-0.447466	1.70798	0.00743741	0.0777555	0.1919	-0.883498
Aradu.344E5	-1.00735	0.93604	-0.0717299	-1.06258	-0.82633	-0.837669	0.853986	0.447514	0.911431	0.158629	0.751806	0.110327
Aradu.347MY	1.25452	-0.800601	-1.30699	1.34019	0.860566	0.273266	0.592998	-0.132867	-1.17836	0.314668	-0.381052	-0.71627
Aradu.34BLX	-0.670879	0.353206	-0.667849	-1.21812	-0.753409	-0.804258	0.821621	0.726492	0.874965	0.575401	1.05033	-0.0763076
Aradu.34UTA	0.324901	-0.622941	-1.08054	-0.38327	0.886133	-0.362371	0.306193	0.897945	-0.534789	0.155118	-0.066929	-0.880855
Aradu.35P83	-0.207596	1.72277	1.17689	0.514168	0.323347	0.440205	-0.780145	-0.826865	-0.0659442	-1.16673	-0.579128	-0.455076
Aradu.35R10	-0.657144	1.42611	0.746377	-0.687041	-0.884348	-1.20523	0.506211	0.736262	0.590475	-0.20733	-0.0299653	0.0518629
Aradu.36B88	0.848644	-1.00025	-0.937416	1.28716	1.29559	-0.0646696	0.0412381	-0.737399	-0.553434	0.583623	-0.771388	-0.588236
Aradu.36F6H	-0.709929	0.785468	0.967611	-1.16301	-0.712702	-0.260387	-0.382377	0.60858	0.71045	-0.670124	0.372146	0.499098
Aradu.376FV	0.483516	1.33601	0.903225	0.421282	-0.245289	-0.792956	0.901553	-0.592233	0.0673319	0.599681	-0.290587	-0.399965
Aradu.379G2	-0.397389	0.714851	0.199027	-0.476671	-0.926981	-0.214144	0.533133	0.0597798	1.02534	-0.141817	0.497631	-0.0350011
Aradu.37I5C	1.0112	-0.764299	-1.0186	1.20993	1.04116	0.0759777	0.197564	-0.231005	-0.812527	0.732942	-0.499301	-1.15007
Aradu.38Y8J	0.238482	-0.877325	-0.94757	0.669618	0.922253	0.470828	0.450061	-0.591884	-0.724331	0.78694	-0.326612	-0.573113
Aradu.3A8LB	-0.546971	1.0844	1.0625	0.0679727	-0.550873	-0.342795	0.0712354	-0.519921	0.00521385	-0.407393	0.148123	0.0191799
Aradu.3BW12	-0.937418	0.414634	0.18123	-0.507836	-0.481275	0.302515	0.609814	-0.589688	-0.735706	-0.108889	0.377099	1.34458
Aradu.3EF6P	1.21176	-1.34335	-0.748027	1.01238	1.00465	-0.3354	0.16415	0.0583926	-0.39973	0.572621	-0.569783	-1.28528
Aradu.3EX3F	-0.773012	1.00702	-0.0307067	-0.340075	-1.57794	-0.638683	0.77658	0.428569	1.04079	0.0150473	0.341005	0.764624
Aradu.3FR7T	0.258393	0.637703	0.325438	0.614942	-0.403231	-0.3197	0.456023	-0.867677	0.0204844	0.462703	0.130781	-0.515003
Aradu.3G9VK	-0.49994	-0.49994	-0.215687	-0.0311635	0.437884	0.423551	-0.439938	-0.11321	-0.387888	0.0580361	-0.429643	-0.0626701
Aradu.3IT1U	0.972308	-0.687772	-0.529141	1.14206	0.933458	-0.196529	0.459266	-0.215313	-0.821719	0.00486816	-0.832003	-0.924766
Aradu.3J4Q3	-0.183706	0.661433	0.460923	-0.288333	-0.340512	0.141373	0.00143858	-0.678924	0.270127	-0.0875013	0.457351	-0.0650425
Aradu.3K2DH	-0.322646	1.60016	0.00343326	-0.415607	-0.481432	0.482317	-0.664432	0.597139	-0.52046	-0.194841	0.298765	0.567312
Aradu.3K9KE	-0.899066	0.185402	0.373243	-0.838939	0.0766728	1.48112	-0.806335	-0.992443	0.474432	-0.207254	0.498719	1.18256
Aradu.3L8WA	-0.289724	0.48592	1.11612	-0.464217	-0.378986	-0.389004	0.037315	-0.496686	0.594755	-0.430811	-0.0258914	0.279929
Aradu.3LW1Z	0.0208681	1.90988	1.00812	0.30852	0.393284	0.184391	-0.194387	-1.24642	-0.75646	-0.787067	-0.273157	-0.235569
Aradu.3MV5M	0.541698	-0.834553	-1.53058	0.405449	1.15473	0.220082	0.16523	0.195955	-0.700846	0.128845	-0.232299	-0.391376
Aradu.3N04M	1.09976	-0.936872	-1.36995	1.25855	0.703966	-0.376478	0.491121	-0.0649117	-0.692038	0.871977	-0.367405	-1.06395
Aradu.3N314	0.31608	0.742335	1.43648	0.300598	-0.0967451	0.0606877	-0.247886	-1.17253	-1.24683	0.111891	-0.167173	0.496752
Aradu.3P8T6	1.31963	-1.04737	-0.929866	1.47775	0.943292	-0.32566	0.428236	-0.386815	-1.17317	0.442232	-0.495482	-0.561189
Aradu.3PC6T	0.325028	0.201523	-0.643235	0.490607	0.990676	1.0206	-0.947328	-1.00837	-0.674771	-0.312543	0.220802	0.568887
Aradu.3PW83	0.86685	-0.509636	-1.35069	0.876465	1.03686	-0.583373	0.518772	0.685396	-0.980477	0.716805	-0.404499	-1.04902
Aradu.3Q2DY	-0.569337	0.513615	0.317694	-0.475505	-0.283176	0.39981	-0.256808	-0.869262	-0.138297	-0.18703	0.292567	0.508084
Aradu.3Q89L	0.00222553	0.827056	-0.411263	0.103054	-0.696427	-1.17414	0.91047	-0.295635	0.648077	0.251412	0.457275	0.0541606
Aradu.3TE64	-1.00124	-0.805776	-1.00124	-1.00124	-1.00124	-0.933295	0.958474	1.18081	0.922087	1.08981	0.926318	0.747362
Aradu.3TJ8Z	1.53027	-0.00280933	-0.884089	1.03292	0.824694	-0.547649	0.655094	0.127034	-1.024	0.10694	-0.797194	-0.585355
Aradu.3TU4S	0.504042	-0.538025	-0.739334	0.215024	0.905714	-0.462726	-0.142612	0.0320047	0.666334	0.371832	-0.103298	-0.753591
Aradu.3V1BQ	0.0269505	-0.0845407	-1.25126	0.444558	-0.718758	0.247039	0.000452974	-0.889166	-0.158932	0.191008	0.370284	1.65279
Aradu.3V1LI	0.521405	-0.737429	0.0195644	-0.116753	0.851678	-0.247431	-0.737429	1.29104	-0.61672	-0.414246	-0.112449	-0.409472
Aradu.3V23Y	0.0588665	0.49258	-0.18958	0.641907	-0.657027	-0.441741	0.768246	-0.867104	0.095936	0.636546	0.246851	-0.816222
Aradu.3V6IR	0.774846	-0.94178	-0.895009	1.35027	0.237494	-0.519169	0.896349	0.00388643	-0.576911	0.787163	-0.556556	-0.671129
Aradu.3WJ36	0.735237	-0.801712	-0.822586	0.630731	0.446962	-0.583266	1.07719	0.0535018	-0.757512	0.683294	-0.461176	-0.782291
Aradu.3XQ1H	-0.642151	1.37708	1.25762	-0.617833	-0.983299	-0.303538	-0.0320991	-0.346014	0.685321	-0.326817	0.140318	0.604641
Aradu.3Y76Q	1.17738	-1.04856	-1.18503	0.640201	0.975799	0.088705	-0.0750617	0.0948284	-0.596926	0.133239	-0.178753	-0.918037
Aradu.3Y8BU	1.07148	-0.354825	-1.0559	1.17936	1.06186	-0.127606	-0.0141079	0.0744191	-0.526125	0.545504	-0.732743	-1.07553
Aradu.409XI	0.133914	1.58093	1.00942	-0.543213	-0.444011	-0.659209	-0.254571	-0.396163	0.309767	-0.521993	0.284404	-0.08401
Aradu.40FJC	0.954629	-0.324577	-0.889089	0.822366	0.909803	-0.244126	0.000447364	0.580945	-1.14297	0.508717	-0.601989	-0.707842
Aradu.40H5V	-0.0908323	1.12249	0.0973336	0.163234	-0.943673	-0.744265	0.110386	-0.0366107	0.612923	-0.208204	0.268192	0.535056
Aradu.40V65	0.529372	-0.280929	-0.630613	-0.100963	0.525772	-0.00683421	-0.840398	0.681512	0.240052	-0.207599	0.223803	-0.955811
Aradu.41FVK	1.13314	-0.585281	-1.35687	1.53647	0.719845	-0.545405	0.6332	0.123145	-0.776658	0.554411	-0.551859	-1.07144
Aradu.42J9L	0.280817	-1.2825	-1.66037	0.294962	0.72302	0.168067	0.323298	0.891658	-0.411516	0.472453	-0.269129	-0.0753689
Aradu.42LRX	0.830316	-0.68623	-1.46403	0.428338	1.06495	0.715151	-0.183484	0.0480411	-0.771346	0.41488	0.071539	-1.01764
Aradu.42SQT	-0.640199	1.12071	0.284674	-0.734544	-0.077767	-0.362179	0.108223	0.0634583	0.104247	-0.296757	0.921928	0.647226
Aradu.42TRG	-0.493206	0.343377	0.14311	-0.782845	0.0418785	1.12318	-0.977568	-0.942646	-0.210724	-0.594274	0.559089	1.11044
Aradu.42UET	0.869556	-0.612067	-1.17979	1.13497	0.762968	-0.645545	0.127841	0.318572	-0.730766	0.576393	-0.360174	-0.553966
Aradu.43C5A	-0.630847	0.223119	0.26553	-0.868107	-0.297713	1.20616	-0.593399	-1.11511	0.393321	-0.525417	0.827465	1.22614
Aradu.43CK8	-0.590574	1.40101	1.25949	-0.517725	-0.748005	-0.49211	0.259552	-0.303185	0.59498	-0.380669	0.25153	-0.0584655
Aradu.43J56	-0.150453	1.21462	0.83785	-0.566019	-0.747596	-0.478179	-0.392953	0.489732	0.467061	-0.623193	0.0532686	-0.394711
Aradu.44CZN	1.37769	-0.446833	-0.811953	0.766928	0.875896	0.161376	-0.699143	0.087601	-0.889373	0.0583466	-0.756594	-0.615688
Aradu.45Z8D	-0.904601	-0.0677442	0.589384	-0.555042	-0.402931	1.25404	-0.404336	-0.48082	-0.279645	-0.801095	0.596651	1.37549
Aradu.463X7	0.0469343	0.839493	0.0387693	0.340295	-0.75494	-0.821457	0.78076	0.196296	0.324561	0.607377	0.189358	-0.17477
Aradu.46DHP	-0.977702	-0.949888	-0.925633	-0.992096	-0.992096	-0.992096	0.891413	1.00041	1.17711	0.791221	1.04865	0.87456
Aradu.46JIY	0.391826	1.82069	0.318244	0.335114	-0.461227	-0.765515	0.0058295	0.222527	-0.407122	-0.207159	0.0497287	-0.561542
Aradu.46ZNY	0.947307	-0.480349	-1.18631	0.764893	0.905561	-0.0654846	-0.132819	0.599814	-0.613124	0.635887	-0.0962815	-1.34523
Aradu.470ZP	0.0584798	-0.67032	-0.665222	0.272732	1.33066	0.552273	-0.64184	0.00383181	-0.640686	0.156922	-0.591111	-0.404478
Aradu.47HWK	-1.47384	0.71589	0.752291	-0.611265	-0.526985	0.458257	-0.0105477	-0.621733	0.36461	-0.36126	0.517359	1.37326
Aradu.47ZLQ	0.590348	-0.807742	-1.58534	0.504768	0.830234	-0.17205	0.957826	0.414772	-0.357004	-0.0504834	0.0978115	-0.861549
Aradu.485JI	0.58422	-0.748979	-0.647113	0.868349	0.607551	0.115214	0.719045	-0.452258	-0.74114	1.23492	-0.711698	-0.594054
Aradu.487EP	-0.923246	0.867586	0.734798	-0.777921	-0.32546	0.00492645	-0.112487	-0.523916	0.692159	-0.827815	0.341618	0.49609
Aradu.48GKA	0.994077	-0.0585833	-1.10083	1.00219	0.646377	-0.67104	0.442065	1.00117	-0.530502	0.519587	-0.568439	-1.3559
Aradu.48GRH	0.650173	-0.863383	-0.756405	1.35526	0.963702	-0.10117	0.753079	-0.47752	-0.86431	0.432129	-0.565213	-0.927125
Aradu.49524	-0.558678	-0.0649192	0.89026	-0.243472	-0.834883	-0.0306762	0.523853	-0.908722	0.500187	0.33377	0.406912	-0.051381
Aradu.49T9W	-0.120684	1.08907	1.96088	0.00149657	-0.0144251	0.328747	-0.503773	-0.727646	-0.415026	-0.920011	-0.0308897	-0.284743
Aradu.49WWP	-0.780513	0.981017	0.804029	-1.53668	-0.668563	0.294427	0.520289	0.0756396	0.483195	-0.3506	0.473444	0.467279
Aradu.49Y5V	1.08284	-0.915999	-1.87894	1.17657	0.563074	-0.0856434	0.183405	0.517354	-0.266809	0.331822	0.00539222	-1.06637
Aradu.49YYG	-0.553885	0.0924061	0.129022	-0.408068	-0.169418	1.249	-0.867966	-1.13764	-0.138706	-0.396586	0.678088	1.15281
Aradu.4B2Z2	-0.745364	1.15864	1.06783	-0.295723	-0.675784	-0.0399251	0.746075	-0.366758	0.365341	0.0747128	0.158464	0.0564014
Aradu.4B6GH	-0.0948417	0.0965861	-0.145261	0.157993	0.839152	1.24625	-1.23034	-1.27885	-0.626107	-0.547218	0.271071	0.733418
Aradu.4B9ZF	0.146625	-0.814982	-1.1584	0.759882	1.12355	0.308739	0.285045	0.304795	-0.693945	0.355639	-0.58206	-0.834514
Aradu.4BB8C	0.658244	1.3812	0.788374	0.153945	-0.354402	-0.37502	-0.772387	-0.572027	0.143217	-0.147252	-0.149312	0.199407
Aradu.4CJ5C	0.805516	-0.535621	-0.892484	1.22714	0.553173	-0.694152	0.208698	0.492758	-0.864971	0.305112	-0.146755	-0.816667
Aradu.4DA0K	1.01365	-0.227743	-1.36671	0.47266	1.35848	-0.106301	0.0515887	0.654844	-0.894127	0.394769	-0.378673	-0.798478
Aradu.4DR8L	-0.457187	1.32079	0.518845	-0.762317	-0.671736	-0.218274	-0.176564	0.465426	0.601141	-0.674375	0.293104	0.604305
Aradu.4DV0N	-0.124631	0.856365	1.39965	-0.00318999	-0.353942	0.890779	-0.511181	-1.03517	-0.0890963	-0.850235	0.313197	0.151475
Aradu.4F69P	-0.473284	0.99673	0.574178	-0.993376	-0.938876	-0.765532	0.455688	0.410313	0.77035	-0.0755279	0.394141	-0.519449
Aradu.4FA0W	-0.745161	1.23473	0.600057	-0.739257	-0.7904	-0.0662346	-0.0976163	0.401296	0.790859	-0.57418	0.563968	0.221205
Aradu.4FW4N	-0.0838951	-0.881668	-0.898083	0.0535048	0.383726	-0.641985	0.987873	1.03208	-0.201294	0.843163	0.209645	-1.32831
Aradu.4GU5A	0.306586	-1.21778	-1.47649	0.798617	-0.162191	-0.756092	1.26175	0.505734	-0.440214	0.98276	-0.000650396	-0.220404
Aradu.4I33C	1.14657	0.879745	-0.276065	0.570278	1.12001	-0.0487659	-0.219987	0.175052	-0.955779	0.0259805	-1.14544	-0.826838
Aradu.4KG1M	1.05508	-0.339772	-0.533142	0.565682	0.60045	-1.16502	-0.105127	1.21706	-0.15083	0.594963	-0.418652	-1.06843
Aradu.4M90H	0.396114	-0.948227	-1.1126	0.921804	0.587841	-0.327818	1.48118	0.0413879	-0.560692	1.08476	-0.592724	-0.631691
Aradu.4M95U	0.293029	-0.608955	-0.603124	0.736851	0.517874	-0.178077	-0.481372	0.0634837	-0.6293	0.649761	-0.7889	-0.786727
Aradu.4MI1I	-0.0865126	0.765017	0.284448	-0.312615	-0.769989	-0.723216	0.356701	0.302478	0.897506	0.490134	0.119181	0.239562
Aradu.4Q6EQ	0.191475	-0.843879	-0.876524	0.772112	0.837886	-0.0840023	0.909244	-0.300349	-0.752948	0.664956	-0.550055	0.0332176
Aradu.4R68R	0.709559	-0.777451	-1.16048	0.461043	1.24032	-0.0752148	-0.050246	0.128351	-0.506621	0.330518	-0.682294	-0.763494
Aradu.4R69H	0.415332	1.47313	0.727524	0.0876232	-0.515847	-1.08059	-0.0569108	-0.242818	0.0276263	0.178494	-0.264372	-0.609137
Aradu.4RE2S	-0.0283234	0.540299	1.21869	0.210397	0.00777807	1.6544	-0.808286	-1.3368	-0.4877	-0.628212	-0.297343	-0.648603
Aradu.4S34G	-0.465773	1.62919	0.322188	-0.648364	-1.00512	-1.00649	-0.0208003	0.602981	0.803204	0.00359653	0.0310978	0.247513
Aradu.4S63Z	-0.868302	1.01901	0.873459	-1.23589	-0.596177	0.46047	-0.0888118	0.132209	0.839351	-0.309544	0.0845292	0.796457
Aradu.4S94M	-0.387441	-0.0266006	0.611004	-0.095924	-0.125588	0.622424	-0.406733	-1.41126	-0.128877	-0.713897	0.868808	0.228778
Aradu.4SA7Z	-0.650136	1.05604	0.587823	-0.94968	-0.87583	-0.0446849	0.266996	-0.128586	0.522036	-0.443677	0.467352	0.661806
Aradu.4TY89	0.650359	0.496502	0.0375946	0.848081	0.495187	0.207793	-0.9441	-1.25484	-0.762089	-0.248494	0.0455011	0.918633
Aradu.4UX7L	-1.18441	0.288218	-0.820838	-0.164717	-0.553122	0.607366	0.51987	-0.338178	0.63756	0.302217	0.362756	0.282134
Aradu.4VZ9K	-0.372126	0.983159	0.272416	-0.13717	-0.990698	-0.333084	0.0651834	0.12716	0.332429	-0.60518	0.256488	0.45841
Aradu.4W5NX	-0.4432	0.632134	-0.594647	-0.633803	0.23016	-0.109229	-0.2076	0.534816	0.805853	0.523396	0.235542	-0.124946
Aradu.4X1GI	0.688762	-0.934578	-0.940144	1.01709	0.986907	-0.119458	0.453863	-0.519321	-0.675581	0.782334	-0.740472	-0.308537
Aradu.4XP3R	-1.28759	0.769346	0.329318	-1.19152	-0.921512	0.358876	0.851398	0.202556	0.513966	0.155134	0.185179	0.938908
Aradu.4XZ0U	0.706512	1.47908	1.60521	0.235908	-0.439733	-0.03879	-0.451867	-0.775351	-0.56227	-0.213893	-0.310816	-0.725025
Aradu.4YS1L	0.62979	-0.88936	-2.02214	0.451264	0.739269	0.0618772	0.498949	0.610711	-0.583455	0.223649	-0.0811805	-0.181324
Aradu.503J9	1.59784	-0.16431	-1.09106	1.18665	0.678383	-0.342001	0.192539	0.522907	-0.599898	0.513882	-0.665863	-1.19198
Aradu.50EM8	1.3838	-0.406089	-1.16833	1.29269	0.610664	-0.655217	0.435914	0.348144	-0.492541	0.932419	-0.582357	-1.20189
Aradu.50M8D	-0.511049	0.439353	0.171598	-0.254335	-0.0158948	0.934835	-0.702935	-0.772942	-0.419051	-0.576054	0.866376	1.16613
Aradu.50R4M	-0.342511	1.3868	1.82047	-0.591649	-0.700515	-0.704208	-0.161052	-0.824075	0.506387	-0.588735	0.12754	0.455542
Aradu.50VQL	0.367798	0.878898	0.894608	-0.111931	0.080133	-0.186446	-0.425449	-0.436137	-0.40488	-0.341368	0.399451	-0.898257
Aradu.511PZ	0.105649	1.1481	0.656339	0.205186	-0.518102	-0.490047	-0.0780291	-0.31906	0.494315	-0.333647	0.223685	-0.371409
Aradu.52DEQ	-0.912536	0.803453	0.548299	-0.807414	-0.624228	0.636191	0.105924	-1.04093	0.0773757	-0.549403	0.469195	1.03578
Aradu.52IU0	-0.447468	1.5706	0.718522	-0.70893	-0.693134	-0.515404	0.298996	0.184151	0.586059	-0.637146	0.0933458	0.0671388
Aradu.5358D	0.0884841	0.359616	0.960552	0.303904	-0.791268	-0.489563	0.257093	-0.974173	0.254614	0.458067	-0.265161	0.800569
Aradu.538H3	-0.4345	1.22952	1.30405	0.365682	0.0975464	-0.119291	-0.277128	-0.652565	-0.288512	-0.135872	0.165287	0.0204659
Aradu.53XTB	-0.238326	-0.963685	-1.03531	-0.0593877	0.369334	0.233792	1.24247	-0.27289	-0.765809	0.670928	0.0778348	-0.0660743
Aradu.54E1H	-0.909274	0.890959	0.706641	-0.676996	-0.763115	0.432573	-0.421313	-0.443667	0.112023	-0.358091	0.306097	0.857219
Aradu.55274	-0.14663	1.28947	0.410501	0.0905601	-0.372901	-1.27718	0.522384	-0.22861	0.245894	-0.190498	0.158074	-0.293666
Aradu.55IX8	0.0107275	0.82603	0.677638	-0.491893	-0.795429	-0.3299	0.185448	-0.35739	0.776576	-0.542884	0.338015	0.0256898
Aradu.55P8S	1.2322	-0.0207974	-1.3278	0.844113	0.957	-0.515626	0.727359	0.309673	-0.528131	0.450137	-0.751764	-1.03354
Aradu.55ZBP	1.11423	-0.970539	-1.02522	0.970115	0.923802	0.163337	-0.144509	-0.130868	-0.723414	0.202697	-0.412162	-0.613159
Aradu.56X7I	0.325451	2.22422	0.448793	0.128767	-0.47404	0.328756	-0.142375	-0.672301	-0.0965286	-0.582524	-0.45455	-0.0577881
Aradu.57W40	-0.899859	1.31411	0.945363	-0.591285	-0.670267	-0.0652652	0.160427	-0.635671	0.379567	-0.555705	0.681651	0.849733
Aradu.58JFQ	0.95542	-0.855527	-1.27173	0.763163	1.16208	0.375996	0.112213	0.102529	-0.904886	0.535309	-0.290784	-0.9478
Aradu.5D42D	-1.09249	1.10963	0.932821	-0.684286	-0.824398	-0.189344	0.0483272	0.14841	0.418686	-0.37131	0.580756	0.213626
Aradu.5D5JN	-0.0776928	0.215327	0.148569	0.331228	-0.490466	-0.334243	0.827033	-1.11205	0.197291	0.176478	0.372464	-0.332708
Aradu.5DD09	1.11576	-0.523318	-0.789374	1.45865	0.495977	-0.314222	0.0698217	0.19219	-0.849217	0.757468	-0.438342	-1.48157
Aradu.5GH6D	0.720712	-1.00009	-1.14774	0.254813	1.18662	0.33033	-0.195132	0.347624	-0.760894	0.224858	-0.315817	-0.426309
Aradu.5H16F	-0.507162	-0.315259	-0.576853	-0.576853	0.0173737	0.882056	0.185292	-0.576853	-0.154198	0.0272573	0.431731	0.913253
Aradu.5I3G5	-0.583214	0.958168	1.50554	-0.498227	-0.589689	-0.614399	-0.324889	-0.0995361	0.124288	-0.221872	0.292203	0.553011
Aradu.5IY98	0.689986	0.489151	-0.411279	-0.333275	0.708893	-0.285437	-0.616937	1.41475	-0.295437	-0.176935	-0.495786	-0.806007
Aradu.5K5I7	-0.466873	0.920743	0.974453	-0.454749	-1.0133	-0.98303	0.339716	0.223003	0.851187	-0.286395	0.377925	0.318483
Aradu.5KK7K	-0.474674	-0.0152046	0.580045	-0.813633	-0.813633	-0.059963	0.346862	-0.524207	0.62498	0.630737	0.278356	0.284455
Aradu.5L500	0.951324	-0.783168	-1.36508	1.08902	0.939382	0.117118	0.39061	-0.218825	-0.438367	0.465003	-0.449305	-1.18546
Aradu.5MH5E	0.551144	-1.29225	-1.57581	0.586569	0.675932	-1.20708	0.513696	1.19556	-0.165469	0.921089	0.359817	-0.529806
Aradu.5MH8T	0.126844	0.0301172	0.707102	-0.109733	-0.0273373	-0.0146493	-0.14536	-0.829426	-0.119698	-0.561187	0.794458	0.0957311
Aradu.5MK2H	-1.0085	1.37378	0.646305	-0.684523	-0.563095	-0.329961	-0.302675	-0.689728	0.277824	-0.546458	0.80913	0.868703
Aradu.5MK51	0.35245	-1.2904	-1.07807	0.898896	0.471769	-0.181151	0.393235	-0.0171074	-0.367733	1.12115	-0.514641	-0.167015
Aradu.5N08M	0.810862	-0.688358	-0.890817	0.775318	1.12399	0.214573	0.0384517	-0.601331	-0.998001	0.839626	-0.630611	-0.974358
Aradu.5N374	1.54253	-0.507102	-0.566821	0.752037	1.45742	0.108524	-0.518256	-0.363724	-0.841627	0.495983	-0.473601	-0.799758
Aradu.5N3KM	1.20987	-0.50777	-0.985789	1.159	1.00299	-0.0422003	0.155063	-0.0645885	-0.728062	0.338342	-0.692108	-1.06447
Aradu.5Q1K7	-0.40939	0.399557	0.103997	-0.570969	-0.758967	-0.585883	0.509273	-0.903814	0.526931	0.415839	0.940601	0.25383
Aradu.5R97S	0.456838	-1.34923	-1.13323	1.20632	0.686448	0.280287	0.582345	-0.75693	-0.642318	1.08644	0.0216579	-0.629954
Aradu.5RE8S	-0.887944	1.79227	1.19104	-0.347332	-0.827095	-0.885614	0.0960867	0.451155	0.31725	-0.0775215	-0.0457702	0.662499
Aradu.5S6XB	0.036814	-0.373431	-0.683542	0.467894	0.366663	0.651578	-0.435635	-1.44522	-0.408317	-0.073251	0.470361	1.478
Aradu.5SR04	-0.78384	1.29184	0.495352	-0.261598	-1.19491	-0.53943	0.0606483	0.372395	0.633286	-0.0770064	0.36475	0.575599
Aradu.5T6BE	-0.39278	-0.2761	-0.560665	-0.733762	-0.100926	0.709224	-0.446858	-0.733762	-0.316974	-0.0729947	0.757807	1.99304
Aradu.5U3QZ	1.12043	-0.27488	-1.09928	1.28775	0.975874	-0.477167	0.512323	0.0105062	-0.399749	0.575651	-0.696197	-1.3363
Aradu.5UA45	1.15132	-0.121974	-1.11981	1.27669	0.980183	-0.657595	0.703118	0.447613	-1.01698	0.293368	-0.580275	-1.46897
Aradu.5W065	-0.659896	0.0139228	-0.077243	-0.45417	0.332395	1.39184	-0.179135	-0.726605	-0.689423	-0.602386	0.746537	0.531972
Aradu.5W566	0.657167	-0.554532	-1.47569	0.770416	0.835503	-0.184344	-0.0444138	0.742229	-0.429844	0.770116	-0.603731	-0.732676
Aradu.5WK97	-0.776805	0.700943	1.12217	-1.00448	-0.826338	-0.489723	-0.011043	-0.0817068	0.891998	-0.0641424	0.332827	0.620243
Aradu.5X8VR	0.643304	-0.296048	-0.450104	1.21012	0.63565	-0.243403	0.398299	0.0520144	-0.75294	0.560301	-0.879935	-0.782569
Aradu.5XE7I	0.582534	-0.0329662	0.16647	0.394255	0.952811	-0.602669	-0.361482	1.18675	-0.485418	0.271581	-0.435396	-1.21746
Aradu.5Y4LG	0.0636332	-0.18796	-0.670467	0.166477	0.765349	0.738066	0.0434252	-1.25684	-0.94577	0.0744383	0.307724	0.894988
Aradu.5Y6NX	0.953593	-0.683222	-0.936781	1.01819	1.19996	-0.0944319	0.22846	0.732267	-0.759609	0.216402	-0.60257	-0.696715
Aradu.5Z6ML	-0.716183	0.194331	1.38131	-0.558237	-0.341281	0.866218	-0.807492	-0.878978	0.869533	-0.548907	0.0110035	0.634452
Aradu.60DAC	-0.881341	0.932369	0.825209	-0.930834	0.0293923	1.31893	-0.875233	-0.80162	-0.0175073	-0.754066	0.195576	1.57662
Aradu.60HCE	1.27186	-0.783943	-1.21183	1.34825	0.730601	-0.589636	0.270556	-0.307501	-0.4886	0.779302	-0.310177	-1.14393
Aradu.60S2U	-0.357412	0.115279	0.0557683	0.0344304	0.715728	1.11196	-0.268787	-1.63372	-0.767196	-0.379824	0.290155	1.13131
Aradu.61HSA	-0.143464	1.02978	0.17721	-0.609938	-0.615479	-0.411996	-0.601763	0.573471	0.916253	-0.264368	0.499741	-0.181994
Aradu.61NAP	0.0711186	1.53238	0.148569	-0.126116	-0.0684524	-0.679487	0.604092	-0.254237	0.000542741	0.427403	0.309509	-0.655314
Aradu.61UVS	-0.0408136	1.87134	0.216338	-0.33915	-0.263705	-0.806838	0.00920031	0.62285	0.0897319	0.175734	0.200207	0.218477
Aradu.62PY8	1.03622	-0.75114	-1.18069	0.788546	1.21753	-0.190653	-0.210352	0.436898	-0.661529	0.370839	-0.304138	-1.10234
Aradu.637TZ	1.36309	-0.61175	-0.503785	2.17136	0.167791	-0.622871	-0.465883	0.0827075	-0.475508	0.0167178	-0.775757	-0.761486
Aradu.643FZ	0	0	0	0	0	0	0	0	0	0	0	0
Aradu.646B6	0.835548	0.507495	-0.188303	0.85121	0.440973	-0.274344	-0.314285	1.00556	-0.453518	0.316362	-1.11007	-1.26228
Aradu.64B2V	-0.407132	1.57857	1.43032	-0.354272	-0.547862	-0.970437	-0.0912857	-0.133512	0.209005	-0.158595	-0.282733	-0.0967395
Aradu.64BNM	-0.627467	0.894029	0.918917	-1.07267	-1.04035	-0.94287	0.409962	0.529314	0.708851	-0.0874755	0.468346	0.207172
Aradu.64PSN	0.417103	0.671965	0.205743	0.136211	-0.381963	-0.118463	1.24473	-0.476856	-1.32462	0.286937	-0.0148769	0.000457289
Aradu.65DGV	0.809806	-0.6822	-0.74398	1.2444	1.09563	0.250568	0.45168	-0.641122	-0.799013	0.239784	-0.613883	-0.827628
Aradu.65PX4	-0.385422	0.934833	1.10716	-0.734766	-1.03747	-0.656528	-0.149063	0.243084	0.982044	-0.375851	0.282792	0.412069
Aradu.65QW9	0.850922	0.809795	-1.3433	0.953099	0.0532847	-0.687574	0.644257	-0.15526	0.0952963	0.553962	-0.0136531	-0.81383
Aradu.665TV	0.846076	-0.574494	-0.715865	1.43381	0.986909	-0.581857	0.0804434	-0.0937363	-0.753999	0.236828	-0.532198	-0.143413
Aradu.669IL	1.35298	-0.25601	-1.06133	1.51156	0.843948	-0.427412	0.204756	0.357594	-0.902695	0.511671	-0.683037	-0.997003
Aradu.68LAM	0.642582	-1.05125	-0.872603	0.337072	0.95296	0.282483	0.295579	-0.581488	-0.586515	0.630692	-0.300062	-0.843188
Aradu.68X4H	0.062206	-0.603618	-0.628852	0.507629	1.01762	0.228369	-0.205682	-0.204963	-0.754123	0.938191	-0.58753	-0.457922
Aradu.69W3K	-0.156071	0.774773	0.431976	0.261288	-0.675718	-0.0395217	-0.226445	-0.652486	0.559938	-0.382465	0.154215	0.808751
Aradu.69Y6K	-0.314318	1.19617	1.03481	-0.572124	-0.485241	0.306675	-1.19188	-0.192301	0.920956	-0.745751	0.0404334	0.230503
Aradu.69Z0K	0.850625	1.64768	0.365603	0.131143	-1.12928	-0.611044	0.736064	0.0567505	0.245748	0.383692	-0.398317	-0.303413
Aradu.6A38G	-1.0452	0.929216	-0.0758295	-1.06198	-0.47132	-0.0195403	0.176478	0.377337	0.425514	-0.227994	0.708579	0.776256
Aradu.6AI81	1.3476	-0.434134	-1.14731	0.890591	0.845947	-0.597533	0.344507	0.577934	-0.728037	0.170411	-0.869201	-0.642879
Aradu.6B67D	0.425581	-1.14078	-1.69017	0.584758	1.24096	0.265175	0.320753	0.285724	-0.306346	0.165483	-0.457325	-0.589137
Aradu.6D72R	-1.27423	0.491454	0.573844	-0.176924	-0.806875	0.237059	-0.592701	-0.924327	0.76854	-0.195623	0.647575	1.28371
Aradu.6DV22	1.20673	-0.736068	-1.22349	1.20931	1.11888	-0.00526117	-0.3729	-0.120296	-0.645091	0.457581	-0.509156	-1.01715
Aradu.6E2N9	0.101044	1.03752	0.346829	0.860049	-0.79743	-0.827264	0.206403	-0.15127	-0.232669	0.475903	-0.134495	-0.000541371
Aradu.6EJ01	0.66772	-1.18116	-1.18277	0.841346	1.06879	0.0225673	0.178149	-0.221304	-0.224315	0.545141	-0.35572	-1.30815
Aradu.6F4WT	-0.0875919	1.03817	0.625829	0.0170959	-0.786557	-0.534413	0.348374	-0.0380442	0.358887	-0.0871324	0.0635552	-0.197622
Aradu.6FB0H	0.253099	0.705421	0.58397	0.560727	-0.199096	0.132671	0.0913272	-0.502725	-0.765145	-0.428263	0.315576	0.100591
Aradu.6FT5K	0.440693	-0.906746	-0.847461	0.604414	0.518772	0.0880806	0.856312	-0.378729	-0.232206	1.08627	-0.886833	-0.636597
Aradu.6G97K	1.37666	-0.289171	-0.929356	1.40383	0.936318	-0.318236	0.196162	0.369904	-0.736073	0.333762	-0.603228	-1.28043
Aradu.6HJ87	0.487493	-0.572678	-0.609686	0.700512	0.686628	-0.320238	1.05865	-0.465519	-0.51096	0.991022	-0.54636	-0.665424
Aradu.6I1ZR	0.676148	-1.02255	-1.20404	1.12869	0.72606	-0.350941	0.384179	0.473155	-0.309157	0.510129	-0.278145	-1.22175
Aradu.6IH9U	-1.19857	0.992819	0.159752	-1.15146	-0.577243	0.138304	0.171395	0.400978	1.00873	-0.345211	0.260427	0.638935
Aradu.6J8LS	1.26464	0.0224841	-0.194783	0.976706	0.685165	-0.768721	-0.127207	0.485886	-0.636974	0.58715	-0.514844	-0.537011
Aradu.6K8RX	1.08241	-0.76148	-0.96696	1.3892	0.610544	-0.623142	0.841461	0.010735	-0.815364	0.449042	-0.579921	-1.03064
Aradu.6K97H	-0.336605	1.217	1.19271	-0.428793	-0.851796	-0.805578	0.508331	0.0977986	0.406369	-0.0908817	0.0164069	0.0682296
Aradu.6L9XG	0.107691	0.991433	0.0391573	0.198615	-1.00647	0.117781	0.372369	-0.0259967	0.464733	0.249335	0.381176	0.0404766
Aradu.6LH72	1.30724	-0.856226	-0.916232	1.51827	0.739509	-0.372141	-0.372811	-0.037665	-0.72115	0.707704	-0.421683	-0.800889
Aradu.6M9JS	-0.923364	-0.286973	-0.441862	-0.494157	-1.03069	0.0669524	1.08339	-0.0342591	0.675407	0.718862	0.698338	0.414519
Aradu.6M9LZ	0.739133	-0.34465	-1.01439	0.792714	1.19019	-0.207474	-0.352553	0.164159	-0.73676	0.396512	-0.509725	-1.0451
Aradu.6N08G	1.6681	-0.521342	-1.10801	1.35751	0.739304	-0.480076	0.157859	0.077154	-0.393198	0.591649	-0.701412	-1.1112
Aradu.6NH1A	-0.541236	0.39115	0.245116	-0.275971	-0.541236	-0.541236	0.449661	-0.541236	1.18117	-0.208909	-0.0915721	0.0262887
Aradu.6P44A	0.981111	-1.12158	-1.32739	1.02508	1.23387	0.0504337	0.413041	-0.0763089	-0.965068	0.517165	-0.124011	-1.04481
Aradu.6R43S	-0.0436551	0.794409	-0.259948	-0.995936	-0.501742	-0.42841	0.709188	-0.0507941	0.806171	0.449424	1.13903	-0.557685
Aradu.6S44C	0.412655	0.900856	0.190433	0.473605	-0.217407	-1.0068	0.110499	-0.482767	0.381233	0.102992	0.370533	-1.35125
Aradu.6V5Y5	0.00265547	-0.348869	-0.0789318	-0.19218	-0.0775246	-0.882379	0.287074	-0.51493	0.0856746	-0.27801	0.703811	0.439761
Aradu.6W7E4	-0.634006	1.20216	0.245074	-0.556579	-0.777211	-1.049	0.582115	0.107337	0.418506	-0.0681624	0.354111	0.158046
Aradu.6Z600	0.913686	-0.803587	-0.980145	1.34472	1.17019	-0.110398	-0.0577965	-0.269792	-0.451226	0.157209	-0.613322	-0.359849
Aradu.6Z7EV	-1.52065	0.29368	0.433428	-0.769743	-0.771093	-0.57561	1.16927	-0.273211	0.450539	0.614311	0.157948	1.0397
Aradu.70C45	-0.771247	1.14213	1.24018	-0.763687	-1.14719	-0.417146	-0.0841086	0.170881	0.914057	-0.323391	0.17454	0.592607
Aradu.70V2V	-0.753872	0.968691	-0.00188073	-0.0472685	-0.914045	-1.20489	0.568237	-0.0962352	0.695251	0.294111	0.262296	0.457957
Aradu.70W8P	1.1732	-0.742593	-1.02683	1.42172	0.993633	0.0334062	0.0466687	-0.176194	-0.744631	0.616186	-0.431782	-1.00687
Aradu.72I34	1.33132	-0.528827	-1.16473	1.54894	0.924236	-0.286742	0.294932	-0.199598	-0.626223	0.414441	-0.87189	-1.03176
Aradu.72JBM	-0.202814	0.892105	7.41327e-05	0.474896	-0.790587	-0.850637	0.508912	-0.0122375	0.553868	0.344305	0.136503	0.163215
Aradu.72VL6	-1.00965	0.985748	0.687723	-0.236673	-0.0348768	-0.604063	0.390186	-0.431828	-0.158409	-0.0738497	0.438643	0.0250001
Aradu.73E3B	0.390286	0.685486	0.833914	0.516931	-0.391665	-0.0811076	0.221099	-0.616126	0.121393	-0.41772	0.108726	-0.192424
Aradu.73RKR	-0.563496	-0.16653	0.424639	0.478271	-0.106443	0.745754	0.149187	-2.08548	-0.344955	0.110347	0.378527	0.505964
Aradu.73TIL	0.482102	-1.09522	-0.740838	0.795416	0.969458	-0.640819	-0.718927	0.975366	-0.678719	0.647267	0.0244868	-1.09288
Aradu.73ZLX	0.114069	1.43576	0.261498	0.256421	-0.506789	-1.03513	0.516078	-0.207247	0.675617	-0.067494	-0.289195	-0.0134235
Aradu.748MX	0.146466	-0.406012	0.343148	-0.481791	-0.206088	0.312108	-0.698116	-1.04542	-0.167594	-0.24939	0.613277	0.492071
Aradu.74GJX	-0.604786	1.46319	-0.396068	-0.409499	-0.728346	-1.15415	0.515241	0.380132	0.885665	0.693978	0.39317	0.00440158
Aradu.75AY8	0.230956	1.77981	1.10565	-0.0507238	-0.390152	-0.467331	0.226714	-0.0364999	-0.460733	-0.717364	-0.0531023	-0.0418916
Aradu.75AYZ	0.337212	-0.133299	0.667045	0.535506	0.895055	1.44606	-1.19105	-1.74511	-0.669349	-0.770066	-0.0206098	0.0828649
Aradu.75FR3	0.91977	-0.139044	-1.10232	1.03938	0.871718	-0.217153	0.337251	0.185795	-0.470835	0.754129	-0.884959	-1.28621
Aradu.766P6	-0.154934	-0.872202	-0.319539	0.327565	0.0662909	-0.694321	0.561327	1.3533	-0.421237	0.84977	-0.163084	-1.07564
Aradu.76MVK	-0.0576981	-0.569983	-0.754497	0.358098	0.506685	-0.297166	1.40304	-0.073418	-0.556707	1.19815	-0.462537	-0.514985
Aradu.76V5M	-0.838494	0.602981	0.798519	-0.637082	-0.354814	0.115358	-0.440952	-0.715546	0.193688	-0.357568	0.152608	0.679573
Aradu.770Q1	-0.962546	0.539555	1.2943	-0.177242	-0.531965	-0.0327862	-0.105093	-0.36581	0.186618	-0.225958	0.0480836	0.361474
Aradu.77IXI	1.3607	-0.444817	-0.864997	1.44115	0.848034	-0.448239	0.0469608	-0.0979949	-0.208772	0.555408	-0.543656	-1.42122
Aradu.786V9	0.85926	-0.341777	-0.967244	1.03421	1.14312	-0.400556	-0.0367135	0.375513	-0.85102	0.477855	-0.840974	-0.757349
Aradu.78CQ3	0.0876456	1.43821	0.517258	-0.375029	-0.701138	-0.547425	0.619665	-0.0163631	0.646979	-0.356861	-0.0431036	-0.268622
Aradu.78JKA	-0.85596	-0.292324	0.527354	-0.667076	-0.0927741	0.927252	-0.24733	-1.1572	-0.202659	-0.649992	0.896567	0.956028
Aradu.78K64	0.348493	-0.745679	-0.745679	0.886044	1.08739	1.07477	0.442725	-0.658119	-0.718687	-0.286495	-0.483428	-0.598392
Aradu.79D2Y	1.15214	-0.406037	-1.41954	0.269397	0.6036	0.319438	0.719531	0.664917	-0.286277	0.209308	-0.038159	-1.29909
Aradu.7A6EX	0.0712665	-0.591773	-0.551249	0.369998	0.196999	0.500428	0.233281	-1.76871	-0.365365	-0.0925379	0.390763	0.574059
Aradu.7E2JG	0.745305	-0.923551	-1.09339	1.28869	1.08054	-0.316958	0.335062	-0.364015	-0.957244	0.509221	-0.516534	-0.158401
Aradu.7GM9W	-0.244706	1.49875	-0.637411	-0.60909	-0.616165	-0.241335	0.841691	0.49754	0.48259	0.189399	0.113851	-0.308081
Aradu.7H178	-0.641034	1.23871	0.516869	-0.751964	-1.21112	-0.956759	0.00850754	0.400711	1.15466	0.0138508	0.433829	0.631706
Aradu.7I20U	0.843304	-0.578106	-1.00418	0.830137	0.967291	-0.165531	0.574549	-0.0211823	-0.714234	0.266591	-0.487814	-1.13992
Aradu.7IM7T	-0.343095	1.16115	0.816	-0.424738	-0.488417	0.447244	-0.801957	-0.818674	0.335858	-0.666459	0.435702	0.956117
Aradu.7JG8Z	-1.4365	0.0651287	-0.632941	-0.112758	-0.807969	-0.797864	0.696014	0.812223	0.701618	0.641423	0.510204	0.0695477
Aradu.7L15H	-1.21953	0.518373	0.00706038	-0.89618	-0.895372	0.347552	0.631792	-0.223421	0.462513	0.137628	0.781561	0.924383
Aradu.7LZ09	1.3022	-0.65836	-0.912628	0.422731	0.670579	-0.905821	0.189435	0.267406	-0.529742	0.277378	-0.328103	-0.173283
Aradu.7M0WV	1.05279	-0.670142	-1.08767	1.42798	0.789012	-0.0838518	0.470118	-0.46457	-0.505006	0.738087	-0.468126	-0.981225
Aradu.7M1P4	1.50683	-0.249266	-0.75576	0.779941	1.51811	0.144247	-0.392118	-0.374525	-0.836775	0.00583965	-0.683563	-1.09953
Aradu.7M26B	0.807245	-0.583809	-1.37282	1.19905	1.01392	-0.186451	0.488314	-0.270708	-0.55811	0.730837	-0.396789	-1.26384
Aradu.7MF1E	0.161665	-0.484469	-0.616469	0.471749	0.533061	0.596433	1.03321	-0.553367	-0.515472	0.0335799	-0.546347	-0.386804
Aradu.7PP4N	1.43652	-0.305227	-0.847975	1.04633	0.639841	-0.667117	0.842756	-0.208056	-0.536976	0.947319	-0.861988	-0.839227
Aradu.7Q04A	1.17011	-0.16803	-0.540126	0.980203	0.9651	-0.590928	-0.341552	0.815566	-0.769065	0.214246	-0.516016	-1.15427
Aradu.7Q1FC	-0.302733	0.564984	0.76752	-0.53871	-0.758387	-0.156439	0.185465	-0.162475	0.318601	-0.255264	0.419545	-0.455233
Aradu.7Q4MS	1.36038	-0.263164	-0.822314	1.30288	1.16027	-0.383123	0.172995	0.251242	-0.970744	0.331091	-0.769645	-1.19274
Aradu.7Q9EW	1.56307	-0.521286	-0.530845	-0.666544	1.63482	-0.460377	-0.0333495	0.442011	-0.563106	0.543775	-0.160878	-0.551862
Aradu.7S5TM	-0.483415	0.853505	0.970996	-0.454388	-1.06312	-0.99989	0.0154713	0.71776	0.663618	-0.271435	0.338662	-0.189008
Aradu.7SA2L	0.962635	-0.444546	-0.951867	0.620488	0.503173	-0.550773	-0.379947	0.923075	0.285507	0.267923	-0.0311331	-1.1287
Aradu.7SM9X	0.765074	-0.892315	-1.014	-0.106789	0.967221	0.214959	1.17979	0.998612	-0.638208	0.256584	-0.408257	-1.24715
Aradu.7SN56	0.255258	-0.144481	0.0759836	0.667619	0.822929	1.34688	-0.522982	-1.66663	-1.20012	-0.650254	-0.0626427	0.487595
Aradu.7TW9C	-0.391285	1.32376	0.593344	-0.0671478	-0.284765	-0.605447	-0.224953	-0.868486	0.523192	0.272572	-0.273392	0.538355
Aradu.7X64R	-0.272159	0.407786	0.692674	-0.132016	-0.608569	0.198622	0.203143	-0.413449	-0.779191	-0.290336	-0.0583838	1.36973
Aradu.7X8FI	-1.00101	1.34544	1.05076	-0.753514	-0.866919	-0.242954	-0.151806	-0.345288	0.732076	-0.386485	0.385104	0.559891
Aradu.80DIT	0.0121175	1.09363	0.810384	-0.840154	-0.314775	-0.207431	-0.34761	0.04844	0.355466	-0.469926	0.444554	-0.615508
Aradu.80EN4	0.553464	-0.815239	-1.31146	0.383394	1.18011	-0.444533	0.453715	0.483281	-0.856245	0.789053	-0.35907	-0.813727
Aradu.81DGS	0.838717	-0.308254	-1.56803	0.969376	1.03543	-0.344963	0.576256	0.0350357	-0.766918	0.699548	-0.451502	-0.922126
Aradu.81PG7	-0.87405	1.17102	0.531587	-0.387497	-0.395683	1.12242	-0.501126	-0.354583	0.374934	-0.684955	0.334791	-0.041297
Aradu.81WR9	0.547299	0.105411	-1.06043	0.615953	0.831467	-0.872925	-0.00242872	0.871004	0.052719	0.698986	-0.707776	-0.778433
Aradu.8280D	1.02582	-0.862458	-1.07249	1.03276	1.2868	-0.196493	0.241942	-0.00377062	-0.837095	0.226731	-0.401091	-0.906304
Aradu.82P95	0.653977	-1.31828	-1.73245	0.861401	0.720459	-0.360037	-0.0986484	0.398928	-0.129333	0.29318	0.236351	0.265424
Aradu.83BR6	-0.157027	1.17096	0.135007	0.0880905	-0.314142	-0.776679	-0.0818286	-0.180644	1.03707	-0.113617	0.107915	-0.859998
Aradu.83FUY	0.767709	-0.776565	-0.776565	-0.152696	1.17851	0.0700445	-0.00773474	-0.48893	0.0970117	-0.538225	-0.43494	-0.159513
Aradu.83J5T	-0.680896	0.281241	-0.229239	-0.24035	-0.804182	-0.430454	1.47163	-0.675056	0.549786	0.41722	0.223771	0.461995
Aradu.83V35	-0.793494	1.01937	0.550315	-0.132323	-0.501127	-1.03284	0.367917	0.326164	0.072441	-0.40387	0.753426	0.329443
Aradu.841T9	-0.503309	1.33899	0.731106	-0.0440299	-1.05365	-0.598412	0.358941	-0.177167	0.420162	-0.557242	0.167217	0.112796
Aradu.8482Y	0.279948	0.924363	0.904225	0.364974	-0.623241	0.251206	-0.388309	-0.811728	0.139872	-0.650049	0.183404	-0.0490537
Aradu.84WMC	1.01398	0.201467	-0.506507	0.487341	1.21286	-0.240349	-0.503623	0.603999	-1.2069	0.27329	-1.14618	-0.526217
Aradu.852VD	-0.0600048	0.97672	0.625432	-0.305331	-0.603724	-1.14862	0.0695068	-0.0123649	0.799869	-0.344143	0.184218	0.67401
Aradu.869WQ	0.689568	-0.388879	-0.490812	1.02077	0.763805	0.12507	0.141556	-1.26022	-0.640356	-0.0626888	0.163804	0.165742
Aradu.87IV3	-0.430623	0.300264	-0.0493053	-0.334843	0.388792	1.34079	-0.462157	-1.40985	-0.56128	-0.671309	0.580874	0.974913
Aradu.87JYI	0.919362	-0.549004	-0.405492	0.479724	1.41717	-0.564907	0.705077	-0.0445824	-0.784652	0.110103	-0.1337	-0.406757
Aradu.87VSM	-0.556108	1.54719	1.11579	-0.801102	-0.833755	-0.186428	-0.462783	0.519892	0.420505	-0.662382	0.0165466	0.372432
Aradu.88DVA	-0.694218	0.551711	0.786447	-1.20546	-1.20931	-0.125389	0.649378	0.386458	0.910975	0.105795	0.259674	0.263963
Aradu.88Z5A	1.44663	-0.336853	-0.623247	1.37799	1.13872	-0.146877	-0.541504	-0.595762	-0.79085	0.0660106	-0.826276	-0.777214
Aradu.89I67	0.655307	-0.587546	-1.48807	0.73626	1.00124	-0.134785	0.342989	0.557918	-0.893019	0.285571	-0.206885	-0.770398
Aradu.8D3SW	-0.155349	-0.22903	-0.42801	-0.152763	0.792845	1.11383	-0.291086	-1.14232	-0.788026	-0.262575	0.482315	0.950173
Aradu.8E49T	-0.103806	0.217625	0.440185	-0.0587123	-0.496927	-0.170415	0.750329	-0.825407	-0.253295	0.127032	0.582614	-0.284321
Aradu.8ED3J	-0.732346	1.05592	0.51829	-0.184104	-0.856034	0.290284	0.5491	-0.754258	0.456753	0.224938	0.372496	0.794796
Aradu.8ET3H	0.779559	0.000106911	-1.12402	0.48125	0.689368	0.056651	-0.22816	-0.0512297	-0.81172	0.495976	-0.153975	-0.532244
Aradu.8FB72	-0.246856	0.710634	1.55401	-0.614618	-0.412258	-0.21774	-0.602813	-0.0461319	0.797741	-0.500549	0.300722	-0.590708
Aradu.8G40J	-0.504555	1.46447	1.08892	-0.942591	-0.971108	-0.514081	0.0261446	0.505894	0.602488	-0.67157	0.167433	0.355001
Aradu.8G4YR	1.03619	0.100046	-1.06863	0.932455	1.13191	-0.558234	-0.234962	0.909307	-0.555345	0.0921721	-0.57936	-0.884566
Aradu.8G5NQ	0.944803	-0.318793	-1.30371	0.509056	0.528682	-0.8702	1.02615	0.843925	-0.061719	0.66325	-0.134925	-1.05629
Aradu.8G81K	0.962177	-0.878053	-1.29244	0.839209	1.15123	-0.198738	0.715944	0.0503858	-1.0812	0.716252	-0.477159	-0.662514
Aradu.8GP5U	0.178179	-0.0225968	-0.154657	0.466527	0.324977	0.643576	-0.505951	-1.36421	-0.791707	0.0416804	0.20162	0.924879
Aradu.8GS2N	1.12097	-0.0988693	-0.629337	1.12438	0.97482	-0.414654	-0.334848	0.356854	-0.505846	0.124349	-0.921546	-0.709499
Aradu.8I12T	0.319345	-0.408906	-0.649173	0.382387	0.6853	-0.142472	0.905844	-0.0433877	-0.629579	0.547586	-0.615007	-0.652265
Aradu.8I79H	0.866709	-0.727698	-0.705974	0.989137	1.43697	-0.342678	-0.1218	-0.327545	-0.753569	0.610901	-0.448157	-1.15837
Aradu.8J5SJ	1.24236	-1.15232	-1.22065	1.30258	0.87062	0.0418065	0.712261	-0.478602	-0.855374	0.40216	-0.250775	-1.01698
Aradu.8J7ZM	1.37479	-0.853326	-0.454165	0.911817	0.62973	-0.470901	0.504973	0.570933	-1.03233	0.472798	-0.64712	-0.783796
Aradu.8JB7E	-0.830184	0.70567	0.0391176	-0.124726	-0.438591	-0.60574	0.208677	-0.115158	-0.0746111	-0.634435	0.418497	0.0284567
Aradu.8JQ1E	-1.23166	0.945039	0.854327	-0.259127	-0.551234	0.213663	-0.225774	-0.844694	-0.178428	-0.309602	0.532234	1.24366
Aradu.8JX0L	1.24347	0.378737	-0.575538	1.05341	1.01886	0.017287	-0.0214811	0.661589	-0.813542	0.0302388	-0.362143	-1.34045
Aradu.8K5HG	1.25025	-0.868781	-0.920501	0.904245	1.11556	-0.0454838	-0.230782	-0.113759	-0.234175	0.499287	-0.480157	-0.876053
Aradu.8K8TN	0.0850747	-0.668258	-0.718871	0.729188	0.819078	0.310035	0.474296	-0.659222	-0.660488	0.739604	-0.484727	-0.310145
Aradu.8KR0D	-0.321443	1.19808	1.16696	-0.388159	-0.656493	-0.541452	0.0349867	-0.184664	0.653006	-0.66334	-0.205906	0.416702
Aradu.8L9C5	1.12816	-0.295163	-0.903968	0.800967	1.09958	-0.0144647	0.378525	0.611043	-0.787111	0.526145	-0.58249	-1.4607
Aradu.8LT75	-0.0783113	1.05487	0.414344	-0.741849	-0.654894	0.538131	-0.193201	-0.433693	0.155659	0.0528417	0.485088	-0.107701
Aradu.8MI05	1.30239	-0.241097	-1.00333	1.25309	1.05877	-0.144828	0.201534	0.207865	-0.754295	0.260329	-0.917751	-1.39551
Aradu.8NU5X	1.09657	-0.292742	-0.624145	1.15889	1.07588	-0.0989464	0.366946	0.0620511	-0.911077	0.499258	-0.558082	-1.83656
Aradu.8P45L	0.984291	-0.357766	-0.87396	0.781727	0.484452	-0.628613	-0.41492	0.530624	-0.740129	0.548792	-0.332268	-0.831636
Aradu.8Q4X6	1.34801	-0.0799276	-0.676368	1.32255	0.641612	-0.684759	0.209299	0.333843	-0.711455	0.664553	-0.724143	-1.3462
Aradu.8T3RP	1.08228	-0.661153	-0.804158	1.33631	1.32645	0.068123	-0.122615	-0.481181	-0.736816	0.19573	-0.544147	-0.918867
Aradu.8UL0Z	0.517212	-0.838197	-0.801369	1.22612	0.799253	-1.14317	0.235389	0.451822	-0.404131	0.960802	-0.256952	-1.10097
Aradu.8UZ9S	1.09836	-0.508359	-0.955243	1.18403	0.962319	0.0285832	0.375237	0.522525	-0.367463	-0.181301	-0.392607	-0.864385
Aradu.8V13E	0.629939	-0.937999	-0.804671	0.19675	1.17638	0.0161699	-0.148731	-0.16798	-0.591319	0.227642	-0.275719	-0.600019
Aradu.8V21F	0.635217	0.845668	0.112688	0.0772554	0.275582	-0.643842	0.389744	-1.03584	-0.012627	-0.263362	-0.134634	-0.0745649
Aradu.8V9HI	-0.261248	0.0336667	0.313003	0.196323	-0.456757	-0.344381	1.20289	-0.358288	-0.11697	0.731221	0.186983	-0.802996
Aradu.8Y3LK	-0.962535	0.149561	1.49109	-0.294673	-0.919486	0.154489	0.0569689	-0.848536	1.10427	-0.447764	0.210871	0.108503
Aradu.8Y5A1	1.20795	-0.935059	-0.989075	1.20589	0.408295	-0.233097	0.438543	0.407367	-0.508216	0.615917	-0.458883	-0.830411
Aradu.8Y6WE	-0.617057	0.334633	0.583399	-0.337117	0.0934004	1.20415	-0.406561	-1.26064	-0.355287	-0.584009	0.52679	0.578602
Aradu.902BX	-1.21269	1.063	1.40531	-1.00676	-0.853804	-0.213776	-0.0848271	-0.457903	0.701038	-0.447222	0.423306	0.939993
Aradu.903PW	0.945105	-1.03138	-1.02275	0.839767	0.973982	-0.304971	0.198128	0.135208	-0.925869	0.923006	-0.137497	-1.01904
Aradu.90K3H	1.09648	-0.288643	-1.15229	0.844335	0.890989	-0.639066	0.0207407	0.772549	-0.365591	0.850475	-0.595678	-0.867483
Aradu.90QAV	-0.592937	1.42391	1.33467	-0.974371	-0.722934	-0.704722	-0.142448	0.349738	0.593111	-0.458944	0.319238	0.149256
Aradu.910RR	0.554874	-0.794551	-1.25355	1.08602	0.683532	-0.379624	0.815866	-0.421507	-0.978904	0.498574	-0.491971	-0.200578
Aradu.91Y21	-0.783691	0.971338	1.08778	-0.882206	-1.16779	-0.645435	-0.11808	-0.00623234	0.814718	-0.171627	0.467557	0.65481
Aradu.92MYK	-0.894339	0.976825	1.05179	-0.890462	-0.940389	-0.164099	-0.57164	0.52708	0.847828	-0.727189	0.391135	0.681212
Aradu.92WNW	0.184018	-0.00125844	-0.219033	0.513079	-0.50515	0.289573	0.751687	-0.81852	-0.44176	0.182453	0.269811	-0.553874
Aradu.935FX	-0.391902	1.79624	0.773877	-0.412436	-0.627572	-0.984721	-0.114	0.231086	0.764115	-0.528447	0.0950033	-0.331673
Aradu.93BUT	0.275665	1.88343	-0.0964639	0.840946	0.0334196	-0.0450414	-0.0175392	-0.774378	-0.696909	-0.334705	-0.318475	0.655868
Aradu.93ENE	1.20042	-0.663016	-0.842488	1.08036	1.465	-0.0478752	-0.0243213	-0.299537	-0.842488	0.014851	-0.645748	-0.842488
Aradu.93KPX	0.209073	1.6933	1.29371	-0.0975299	0.148072	-0.380783	-0.542006	-0.0857962	0.179147	-0.843379	-0.330908	-0.62005
Aradu.93RCN	-0.338406	-0.19991	-0.319949	-0.378413	0.35761	1.0201	-0.291127	-0.577828	-0.535376	-0.468387	0.180935	1.16342
Aradu.93VCV	0.57031	0.340364	0.161409	0.6612	-0.312829	-0.372754	0.751334	-0.462007	0.208823	0.33282	0.203538	-0.935623
Aradu.93WPA	-0.218088	1.61351	0.616671	-0.163781	-0.777329	-0.867374	0.295168	0.376239	0.232432	-0.129578	-0.125954	0.1514
Aradu.94J1A	1.48788	-0.553449	-0.601419	0.996887	0.42347	-0.548082	-0.214806	0.44406	-0.22625	0.578749	-0.383822	-1.14751
Aradu.94PKC	0.883762	0.0442819	-0.585036	0.435089	0.827249	-0.9217	-0.0220385	0.929866	-0.262509	0.172559	-0.229811	-0.940122
Aradu.94Q69	-0.591972	0.834126	0.266427	-0.660569	-0.0978563	0.515386	-1.21554	-0.998992	0.156571	0.218376	0.918636	0.514884
Aradu.94UYW	0.307676	0.869649	0.598922	0.224102	-0.456008	-1.22001	0.598674	-0.0269224	0.439716	0.157647	0.135347	-0.73855
Aradu.94ZGD	1.25727	-0.649209	-1.04689	1.21959	0.963219	-0.462346	0.401378	0.326604	-0.632376	0.580955	-0.361222	-1.27279
Aradu.95XXR	1.15525	-0.532597	-0.831111	1.12415	0.898007	-0.258533	0.463532	-0.207125	-0.948192	0.517188	-0.542976	-0.876187
Aradu.95YEZ	1.01608	-1.18196	-1.07944	1.04265	0.976146	0.319035	0.516291	-0.772574	-0.847026	0.429847	-0.435839	-0.755634
Aradu.96S2E	-0.796349	-0.198297	-0.104507	-0.377348	-0.33818	0.85992	0.93683	-1.04319	0.32688	0.325748	0.32255	0.634049
Aradu.97TKQ	0.883994	-0.899036	-1.13809	1.13939	1.01861	-0.374939	0.017359	-0.263795	-0.470255	0.643588	-0.378497	-1.33971
Aradu.98K4P	-1.37517	0.731659	-0.0346849	-0.818909	-0.986977	-1.22604	0.937793	0.599169	1.02737	0.402254	0.385287	0.925331
Aradu.98L07	1.18491	-0.0146119	-0.874622	1.39278	0.933276	-0.535329	0.318121	0.223264	-0.980815	0.618788	-0.552529	-1.2884
Aradu.992XN	0.693826	-0.738136	-1.47403	0.246793	0.927878	-0.353728	0.290725	0.766548	-0.0250943	0.326323	-0.173834	-0.941036
Aradu.99AQ5	-1.10317	1.20006	0.543636	-0.22713	-1.09288	-0.738392	0.539437	0.361814	0.27381	0.116716	0.123668	-0.00692639
Aradu.99LYU	0.618946	-0.900301	-0.638015	1.16216	0.539181	-0.324956	0.226494	-0.508085	-0.71373	1.07117	-0.451666	-0.760466
Aradu.9A5U9	-0.523642	0.85362	1.35357	-0.435871	-0.685645	0.263851	0.312801	-1.1587	-0.183374	-0.126324	0.527629	-0.328701
Aradu.9B0RR	0.877669	-0.596529	-1.54454	0.367605	0.824889	-0.148559	1.02941	0.405308	-0.712536	0.623286	-0.410724	-1.18266
Aradu.9B60Q	0.659294	-0.781651	-1.49195	0.522278	0.831864	0.10474	0.61413	0.601876	-0.84561	0.442919	-0.18521	-0.0332263
Aradu.9B6U7	1.021	-0.828683	-0.874331	0.609114	0.815616	0.332485	0.220165	0.380458	-0.976329	-0.377377	-0.946358	-0.264684
Aradu.9C6DQ	-0.398504	0.135207	-0.00840941	-0.700377	-0.214707	0.736898	0.167192	-0.890817	0.301347	-0.447016	0.839765	0.371959
Aradu.9C8P4	-0.475389	0.429015	0.144507	-0.475165	0.325218	1.27051	-0.791496	-0.85973	-0.335575	-0.845938	0.615521	1.31706
Aradu.9C9UT	-0.116065	0.687083	-0.240384	0.0371389	-0.643965	0.252215	0.51823	-0.535652	-0.73617	-0.197244	0.169564	1.08914
Aradu.9D0UC	0.559892	-1.44379	-1.1499	0.617629	0.17845	-1.1457	0.880235	1.09757	-0.114905	1.01992	-0.379356	-0.772633
Aradu.9DS9L	-0.734919	-0.101669	1.77915	-0.701323	-0.91113	0.43001	-0.157331	-1.17833	0.77315	-0.337488	0.234223	0.306704
Aradu.9FW5Z	0.191206	0.58668	0.807378	0.180783	-0.118585	-0.504152	0.442231	-0.989127	-0.383034	-0.275476	0.491094	-0.359277
Aradu.9FX4J	0.747753	-0.471835	-0.63671	0.829001	0.97842	-0.40231	0.0424297	0.107846	-0.355965	0.181277	-0.688613	-1.61325
Aradu.9G0UZ	0.954508	-1.05563	-0.649161	1.42353	0.560052	-0.577604	0.488408	0.544188	-0.661221	0.57282	-0.64623	-1.02762
Aradu.9GX0M	-0.028537	-0.589272	-1.37564	-0.431921	0.279388	-1.03237	0.484508	1.5792	0.500063	0.305495	0.324393	-0.818722
Aradu.9HQ0E	1.06812	0.014237	-0.613336	0.55789	1.20953	-0.718802	-0.0321047	1.09226	-0.290114	0.176516	-0.646992	-0.8862
Aradu.9HU3G	-0.625897	0.947461	0.810801	-0.851444	-0.851777	-0.861753	0.581956	0.0101264	0.805149	-0.0280944	0.353064	-0.00191507
Aradu.9ID7S	-0.647098	1.72775	1.092	-0.773459	-0.499715	-0.589811	-0.0464068	-0.26158	0.199294	-0.378769	0.511617	-0.105938
Aradu.9K5UD	0.943007	-0.75785	-1.11374	0.672097	1.10498	0.299946	0.367723	0.0467668	-0.045581	0.246267	-0.98555	-0.723211
Aradu.9KC5X	0.217383	1.17242	0.543771	0.127579	-0.406669	-0.378823	-0.345958	0.154958	0.195954	-1.06483	0.127322	0.399691
Aradu.9L36R	-0.368955	0.820917	0.843132	-0.544155	-1.00183	-0.943219	0.314127	0.391714	0.871147	0.0550524	0.117793	-0.133099
Aradu.9L616	-0.790386	1.70546	0.0444497	0.156742	-0.178355	-0.092143	0.229818	-0.772925	0.604266	-0.0682704	0.252392	0.586028
Aradu.9L9XR	1.29387	-0.480483	-0.831996	1.39888	1.09387	0.0829448	0.181202	-0.58414	-0.838283	0.446042	-0.917837	-0.959385
Aradu.9LK7Y	1.02321	-0.455019	-1.27531	1.0361	1.01915	-0.026004	0.498403	-0.125834	-0.842368	0.741312	-0.51108	-1.02886
Aradu.9MT7M	0	0	0	0	0	0	0	0	0	0	0	0
Aradu.9P6VM	0.632327	1.10316	1.40793	0.408362	0.478704	0.0604958	-0.191712	-1.13558	-0.428622	0.0284494	-0.416921	-1.62516
Aradu.9QS5K	1.39245	-0.251293	-1.06235	1.44921	0.732059	-0.390271	0.0678377	0.232912	-0.550051	0.540449	-0.738111	-1.06291
Aradu.9R7J6	0.89942	-0.358567	-0.789823	1.48384	0.971826	-0.884237	-0.324653	-0.0619548	-0.907031	0.403709	-0.726185	-0.139129
Aradu.9RE3F	-0.0768847	0.344812	-0.267579	0.600801	-0.361381	-1.14937	0.659366	-0.401628	0.366892	0.356296	0.201553	-0.779537
Aradu.9RK40	-0.399528	0.662941	-0.109836	0.0691613	-1.29464	-0.184906	0.594683	-0.349202	0.220383	0.175853	0.446619	0.0482423
Aradu.9S6MI	-0.237932	0.0917075	0.283299	-0.00611306	0.0390635	-0.724017	-0.366751	0.503198	-0.205549	-0.0339305	0.0785842	0.175428
Aradu.9SR9S	-0.654103	0.931896	0.995728	-0.697684	-1.02551	-0.714107	0.0647479	0.486683	0.962036	-0.197475	0.420182	0.235736
Aradu.9V3GY	-0.879998	0.65366	0.994873	-1.08279	-1.04858	-0.705554	0.231705	0.358377	0.819651	-0.286818	0.424463	0.598112
Aradu.9VQ7B	-0.186114	0.897763	0.517292	0.0264536	-0.807868	-0.145383	0.179021	-0.629413	0.24966	-0.301609	0.585497	0.39745
Aradu.9Y73E	-1.01893	0.823098	1.27178	-0.783983	-1.36351	-0.249227	0.255793	-0.313168	0.784879	0.205603	0.330215	0.555334
Aradu.9Z8WQ	-0.361357	1.09566	1.01518	-0.207286	-0.999339	-0.440119	-0.0410133	-0.153456	0.274269	-0.2121	0.00594426	0.70961
Aradu.A1EFP	-0.678407	0.968209	1.03154	-0.860177	-1.18748	0.119604	-0.182936	0.264781	0.597664	-0.288901	0.414673	0.880062
Aradu.A34Y7	-0.615154	0.766141	0.648237	-0.128633	-0.40488	-0.13757	0.131547	-0.335622	-0.188516	-0.471623	0.711194	-0.0800542
Aradu.A3GCM	0.612994	0.444111	-0.89684	0.931776	0.146991	0.0287666	0.0205235	-1.10947	-0.423599	-0.144539	0.272319	0.234164
Aradu.A3N3V	0.328342	0.338558	-0.53043	0.299083	0.634821	-0.46062	0.0401356	1.51418	-0.00419876	-0.172153	-0.843598	-0.337097
Aradu.A3TK2	-0.954919	0.717305	1.21158	-1.05801	-0.97157	-0.608382	0.17507	0.217699	0.712963	-0.15168	0.280648	0.849467
Aradu.A3WD9	0.570923	0.375571	-0.459788	0.691474	0.936337	-0.701548	0.398226	-0.977378	-0.977378	0.191324	-0.660929	-0.211545
Aradu.A42TE	1.19895	-0.605291	-0.565986	1.05279	1.04895	0.0838432	0.155703	-0.00371377	-0.95706	0.224563	-0.400175	-1.4089
Aradu.A4DEK	1.05187	-0.443188	-1.58534	1.14161	0.970872	-0.696673	0.495235	0.448351	-0.494013	0.535523	-0.597525	-0.947525
Aradu.A4LBS	1.19693	-0.42929	-0.96898	1.31895	1.09797	-0.301798	0.485417	0.0291575	-1.14717	0.659413	-0.559418	-1.2303
Aradu.A57LN	1.12203	-0.686792	-0.750038	1.33297	0.927444	-0.031468	-0.353072	-0.329197	-1.07675	0.522968	-0.670985	0.00201794
Aradu.A58GQ	-0.822788	0.925934	0.777069	-0.727675	-0.776305	-0.231224	-0.447111	-0.142965	0.725117	-0.383233	0.440938	0.620423
Aradu.A599R	0.659836	-0.503573	-0.597043	0.702221	0.647066	-0.608892	1.10481	-0.357506	-0.540546	0.357157	-0.53373	-0.492395
Aradu.A5G80	-0.673721	1.05127	0.690496	-0.171934	-0.721782	0.196859	-0.627538	-0.772477	-0.220925	-0.722551	0.511693	0.424059
Aradu.A68AJ	0.264765	-0.8753	-1.18824	0.993059	0.760773	0.0344881	0.189297	0.062785	-0.408185	1.05298	-0.472873	-0.675998
Aradu.A6BTS	0.483748	1.1547	-0.566112	-0.470183	0.395334	0.476212	0.16193	-0.639746	-0.0848938	-0.0245742	0.750788	-0.344596
Aradu.A6HUK	-0.141147	0.275974	1.30838	-0.169698	-0.941166	-0.430862	-0.93607	-0.270386	0.702288	-0.151088	0.617261	-0.086028
Aradu.A76NP	1.14937	-0.608293	-1.00684	1.4635	0.737002	-0.344721	0.401066	-0.0631827	-0.607105	0.808969	-0.465745	-1.0405
Aradu.A78TV	-0.654139	0.33842	0.403472	-0.333576	-0.525705	-0.446983	0.245954	-0.576752	0.776871	-0.351093	0.119833	0.0241995
Aradu.A8886	-0.894863	0.347254	0.856111	-1.11236	-0.389377	-0.271214	0.0289596	-0.437077	0.410779	-0.134351	0.734128	0.965662
Aradu.A8AWS	-0.566144	0.247405	0.0943543	-1.07256	0.573302	0.936892	-0.948719	-0.682285	0.047082	-0.363392	0.703594	1.02431
Aradu.A8MFY	0.320955	-1.13169	-1.0222	0.556045	0.750261	-0.2045	0.304304	0.0616864	-0.819815	0.56797	-0.166123	-0.109959
Aradu.A8RLN	0.648146	-0.773709	-0.870574	0.907728	1.33859	0.181155	-0.594103	-0.253737	-0.876552	0.396405	-0.753536	-0.469715
Aradu.A9E1A	0.969046	-0.743726	-0.938515	1.30875	0.858854	-0.470457	0.281584	0.0807071	-0.809499	0.347071	-0.627715	-1.03351
Aradu.A9IQR	-0.509966	0.440341	1.63846	0.0593571	-0.258253	0.413251	-0.128336	-0.571419	-0.355612	-0.684829	-0.166709	0.0349994
Aradu.AA1T2	-0.613418	0.989598	0.253238	-0.497386	-0.76588	-0.808807	0.769618	0.27817	0.348514	0.173941	0.514388	-0.0225041
Aradu.ABF0E	-0.234952	0.20529	-0.989734	-0.813936	-0.0507124	1.11846	0.337368	-0.45553	0.356045	0.002285	0.540455	0.0351549
Aradu.AD0UP	-0.353715	0.555294	0.677966	-0.46246	-0.461725	-0.817758	0.576894	0.238882	0.379358	-0.0594106	0.546674	-0.522132
Aradu.ADH1A	0.969002	-0.806179	-0.878413	1.53163	0.801029	-0.368512	0.225644	0.129561	-0.653728	0.573525	-0.832388	-1.04838
Aradu.AE6VJ	0.613088	-0.642685	-0.567986	1.24203	0.512484	-0.416371	0.673154	-0.497492	-0.611726	0.445935	-0.612259	-0.645255
Aradu.AET7G	0.048122	1.54906	1.03015	-0.0154271	-0.197939	0.429675	-0.482545	-0.770894	-0.743981	-0.350473	-0.00517493	-0.0914015
Aradu.AF17Q	0.846927	-0.475499	-0.535905	0.963639	1.24166	-0.336314	-0.1939	0.313973	-0.458395	0.690786	-0.670843	-1.22897
Aradu.AFL8M	0.187148	0.347252	-0.08914	0.109499	0.550667	1.08729	-0.552826	-1.65428	-0.920045	-0.485391	0.362873	0.877979
Aradu.AIF82	-0.425305	0.956976	0.532197	-0.661894	-0.833204	0.0194398	-0.472294	0.344495	0.980558	-0.551792	0.408079	0.76624
Aradu.AJ19G	-0.538786	0.786855	0.602037	-0.733052	-0.642597	-0.0527245	-0.766488	-0.154381	0.92304	-0.597521	0.398632	0.75945
Aradu.AJ5ZZ	-0.19791	1.1511	0.968905	-0.873727	-0.725972	-0.391333	-0.91168	0.528708	0.245643	-0.379827	0.508452	0.924275
Aradu.AKB12	-0.575183	0.928524	1.00605	-0.840604	-0.798721	-0.934923	0.174106	0.383796	0.756916	-0.245412	0.34223	0.426293
Aradu.AKG36	-0.755241	1.13309	1.1601	-0.456333	-1.17042	-0.451744	0.290467	-0.379878	0.631903	-0.100038	0.369078	0.537044
Aradu.AKN5A	0.0260047	1.362	0.784678	0.00273146	-0.549929	-0.651347	0.182119	-0.0408269	0.0381702	-0.349308	0.119203	0.0734094
Aradu.AKZ9C	0.739478	-0.36531	-0.826592	1.10975	1.03353	-0.114054	-0.148527	-0.103391	-0.788567	0.600707	-0.458617	-1.0582
Aradu.AL6NG	-0.105909	0.941302	-0.660317	0.332213	-0.49275	-0.0561332	0.330926	-0.458047	-0.371324	-0.00431701	0.358247	0.335115
Aradu.AL954	0.5901	-1.25375	-1.17645	1.05868	0.56279	0.105331	0.467541	-0.686284	-1.09558	0.723936	-0.192151	0.0788554
Aradu.ALL9T	1.07794	-1.10985	-0.947029	1.57765	0.90923	-0.189673	0.441718	-0.480734	-1.12119	0.540995	-0.213432	-0.859605
Aradu.AM9JS	0.0708889	-0.286651	-1.08682	0.234543	0.36713	-0.197077	1.08564	1.1458	-0.41016	0.243704	-0.424119	-0.905324
Aradu.ANP5R	-0.754499	1.17421	1.32276	-0.959562	-0.953551	-0.100008	-0.439647	0.178516	0.990656	-0.357856	0.142683	0.0774099
Aradu.ANS8T	0.80819	-0.728848	-0.837892	1.20082	1.0854	-0.0644287	0.134522	-0.648421	-1.02163	0.599485	-0.488246	-0.917209
Aradu.APC82	0.280012	0.832604	0.749459	0.377441	-0.236821	0.28784	-0.0750218	-1.0962	-0.14422	0.0873433	0.198566	-0.814913
Aradu.AQ0H7	0.784565	-0.626454	-0.874859	1.19853	1.32706	0.203226	-0.00548891	-0.602768	-0.898909	0.293286	-0.645641	-0.986806
Aradu.AQ6XM	-1.17847	0.662776	0.393701	-0.641087	-0.500646	0.774087	0.646964	-0.988408	0.387335	-0.215541	0.55128	0.55695
Aradu.AQJ6I	1.44249	-0.894289	-0.621841	1.24859	0.690879	-0.661544	0.303284	-0.00933162	-0.946147	0.440524	-0.53522	-0.7837
Aradu.AR3HB	-0.391917	0.783758	-0.338435	-0.369189	-0.394556	0.246056	0.0236952	-0.732296	0.72122	-0.327713	0.318449	0.580768
Aradu.AR630	-0.134361	-0.150351	-0.344335	-0.17485	0.768196	1.39755	-0.544998	-1.21044	-0.694997	-0.562355	0.489644	0.825181
Aradu.AR6MW	-0.734819	-0.992006	-0.903951	-0.820006	0.214835	-0.577553	0.870046	1.13393	0.345924	0.929841	0.458779	0.232902
Aradu.AS232	-0.475133	1.0001	1.4649	-0.635134	-0.544164	0.356641	-0.754504	-0.461799	0.297782	-0.53487	-0.031069	-0.0861719
Aradu.AS4J5	1.51768	-0.32773	-0.665894	1.19879	1.36357	-0.416305	-0.324275	-0.488125	-0.50247	-0.193542	-0.665894	-0.493663
Aradu.ATZ8F	1.05936	0.2371	0.769009	0.327071	1.08107	0.460894	-0.029905	0.59687	-1.15908	-0.614515	-0.904518	-0.513168
Aradu.AVN2W	1.15154	-0.518751	-0.94991	1.06393	1.14899	0.160318	0.145444	-0.287824	-0.964767	0.442721	-0.453955	-1.00277
Aradu.AW5D9	0.0363841	0.95406	-0.0905117	-0.0965163	-1.09413	-0.163321	0.227524	-0.38088	0.620902	0.457032	0.650143	-0.705279
Aradu.AX5BM	0.345575	-0.415844	-1.33696	0.351772	1.37626	0.0450322	-0.300434	0.72674	-0.332571	0.45372	-0.289665	-1.30071
Aradu.AY2VL	-0.278367	1.13771	1.26716	-0.951425	-0.323817	-0.239958	-0.232307	0.0556248	0.280603	-0.616517	0.371033	0.00893176
Aradu.AYG4Q	-0.157	1.08922	-0.128038	-1.04887	-0.262631	-0.241651	-0.0282786	0.106519	-0.249343	-0.0964949	0.368953	0.659162
Aradu.AZT0A	-0.0597322	0.689307	-0.0476327	-0.366354	0.446872	0.795088	-0.996865	-1.27382	0.197186	-0.888582	0.467445	1.12972
Aradu.B09X5	-0.950296	0.00384293	-0.184116	-0.61054	-1.31436	-1.03176	0.683139	0.729199	0.80964	0.041406	0.47078	0.935614
Aradu.B0BG6	-0.511404	1.10632	1.23391	-0.637783	-1.06042	-0.725813	0.056921	-0.325951	0.770116	-0.292073	0.205528	0.564583
Aradu.B0MFP	-0.228178	1.12034	0.615072	-0.958573	-0.96587	-0.152221	-0.359445	0.493802	0.94313	-0.473807	0.209521	0.70609
Aradu.B11YJ	0.584326	0.805503	0.150004	0.0382226	-0.444541	0.052093	0.047331	-0.678677	0.0880331	0.25493	0.541365	0.133619
Aradu.B21Z9	-0.436472	-0.873441	-0.399377	-0.33619	-0.090837	-0.585668	0.889043	1.05583	0.25563	0.345981	0.737881	-0.549254
Aradu.B2GQ6	0.913241	-1.00556	-1.38116	0.818712	1.02457	0.330293	0.226891	-0.321789	-0.863823	0.193384	-0.165573	-0.746438
Aradu.B2K9J	-0.623149	0.323776	0.92411	0.113163	-0.550702	-0.75297	0.283208	-0.706101	0.0913639	0.419743	0.0466867	-0.151576
Aradu.B3DE0	-0.489955	0.619994	1.21052	-0.499622	-0.571904	-0.15091	-0.293	-0.235587	1.1056	-0.153217	-0.362232	-0.264778
Aradu.B3TXI	0.895062	-1.08393	-1.1243	0.791612	0.596748	0.161091	0.169924	-0.112204	-0.786497	0.249604	-0.364181	-0.924978
Aradu.B4D3A	0.326856	-0.0387885	-0.0573639	-0.509741	0.342054	0.366817	-0.714474	-1.09266	-0.523054	-0.248664	0.347852	0.905096
Aradu.B4FEF	-0.826387	1.53232	0.956741	-0.838079	-0.394084	0.111239	-0.202476	-0.321091	-0.189253	-0.799647	0.566725	0.929922
Aradu.B4I2A	-0.307287	1.18363	0.655494	-0.104328	-0.85866	-0.491818	0.506407	-0.0563172	0.306023	0.251885	0.182508	-0.491423
Aradu.B4RFH	-0.954873	0.182436	1.23446	-0.071024	-0.171682	0.453381	-0.709891	-0.219829	0.163398	-0.360419	0.210164	0.132174
Aradu.B4US9	-0.460982	0.478897	0.699219	-0.850039	-0.461621	0.89889	-0.620713	-1.01691	0.102042	-0.758025	0.127233	1.95602
Aradu.B4VGZ	0.978078	-0.399841	-0.97758	1.29348	1.13157	-0.294031	0.523262	-0.386977	-0.755181	0.527363	-0.766938	-0.998062
Aradu.B561I	-1.17858	0.769553	0.98187	-1.01031	-1.04365	0.417345	-0.187172	0.168356	1.07661	-0.191652	0.242713	0.397717
Aradu.B5DNW	0.75803	-0.622017	-0.744674	0.894463	0.728899	-0.566688	1.10411	-0.479091	-0.675173	0.894624	-0.632116	-0.600594
Aradu.B5TNQ	-0.275244	-0.487084	0.800627	0.0619883	-0.563135	0.392067	-0.0239284	-0.60916	0.342793	-0.0535056	0.458293	-0.576458
Aradu.B5X95	-0.714263	1.26415	0.484228	-1.3129	-0.749696	-0.602732	0.0289661	0.927739	0.812092	-0.561522	0.516086	0.750898
Aradu.B5Z5V	0.874442	-0.759512	-0.283046	0.569443	0.881544	-0.653513	-0.678674	0.972361	-0.406407	0.0600586	-0.377385	-0.802723
Aradu.B6KIH	-0.396136	0.160119	0.727822	-0.481883	-0.528463	-0.288825	0.302264	0.585588	0.337153	-0.269671	0.524239	0.412269
Aradu.B6UN0	-0.734619	-0.734619	-0.734619	-0.734619	-0.734619	-0.734619	0.471006	0.283694	1.04293	0.755565	0.693802	0.939965
Aradu.B6YBG	0	0	0	0	0	0	0	0	0	0	0	0
Aradu.B77J2	-0.7089	1.10035	1.10403	-0.220847	-1.13403	-0.234078	0.0238875	0.204146	0.873108	-0.35753	0.0195001	0.564962
Aradu.B786V	0.309487	0.923428	-0.167074	1.29103	-0.52178	-0.828151	0.611192	-0.290655	0.358688	0.940963	-0.152134	-1.052
Aradu.B7XG0	-0.540905	0.0285489	0.0270237	-0.266868	0.156903	1.40699	-0.705986	-1.11887	-0.189664	-0.250646	0.487056	0.662854
Aradu.B8HIV	0.401725	-1.08534	-0.881312	0.433519	0.106897	-1.0149	1.08401	0.247116	-0.294657	1.26904	0.143074	-0.526308
Aradu.B8HUR	1.24986	-0.704281	-0.998078	1.17395	0.937334	0.0859976	-0.0388476	-0.637538	-0.744814	0.647795	-0.682679	-0.962745
Aradu.B8U1W	1.14528	-0.245401	-0.803806	0.664514	1.1229	-0.105916	0.585606	0.271917	-1.00745	-0.126231	-0.703649	-0.924384
Aradu.BB6J3	-0.276919	0.432845	0.190776	-0.594211	0.468919	0.509246	-0.32408	-1.1607	0.0743161	-0.40063	0.673923	0.172436
Aradu.BC6IG	-0.231454	0.169618	-0.46412	-0.6908	0.519381	0.454784	-0.487192	-1.4391	0.218658	0.116548	0.706625	0.937057
Aradu.BCZ93	-1.27238	0.526432	0.262262	-0.697441	0.293264	0.890231	-0.238103	-1.03938	-0.122752	-0.373772	0.952729	0.9742
Aradu.BD60N	0.999997	-0.230822	-1.06895	1.21154	1.04884	-0.192505	0.207895	0.487735	-0.675283	0.357816	-0.976171	-0.620305
Aradu.BD641	1.11951	0.0324893	-0.750961	0.751241	1.06271	-0.57609	-0.872538	0.920753	-0.737919	0.202562	-0.495808	-0.860658
Aradu.BDD78	0.247727	-0.586274	-1.09359	0.351784	0.727558	-0.0754076	0.510171	0.648825	-0.685768	0.743078	-0.902447	-0.577359
Aradu.BF26W	1.36929	-0.338633	-1.19805	0.733833	0.847527	-0.0988973	-0.258028	0.779263	-0.885124	0.275629	-0.477065	-0.825633
Aradu.BGJ4E	0.91962	-0.865079	-1.00009	1.23981	0.903679	-0.104897	0.269416	-0.0955423	-0.659498	0.188533	-0.442052	-0.998273
Aradu.BGK3K	0.926865	-0.699416	-0.924721	1.12796	1.15586	0.00353673	0.0393996	-0.0876917	-0.33571	0.497784	-0.83721	-0.923776
Aradu.BK8YY	-0.00600515	-1.17193	-1.6132	0.738336	0.550453	-0.479619	0.758278	0.186132	-0.409441	0.835402	0.255189	-0.432127
Aradu.BK9AL	1.20988	-0.958585	-0.964431	1.3759	0.944128	-0.156593	0.28754	-0.0502476	-0.809657	0.683518	-0.816029	-0.693365
Aradu.BKX4P	0.809384	-0.766214	-1.03429	1.08943	1.23215	0.0162009	0.451761	-0.223283	-0.775179	0.656702	-0.507319	-0.994158
Aradu.BL1PC	-0.236694	0.92424	0.674665	0.0255367	-0.537167	-0.819686	0.360686	-0.0868695	0.857018	-0.434029	0.232212	-0.210702
Aradu.BN23V	0.57753	-1.21616	-1.04799	1.08468	0.781798	0.400503	0.51535	-0.45597	-0.570244	0.51505	-0.455873	-0.796368
Aradu.BN4MX	-0.353988	0.782345	0.485884	0.168062	-0.240395	-0.331711	0.65933	-0.737125	-0.19032	-0.292381	0.48286	-0.321294
Aradu.BPZ0P	0.145106	1.42079	0.645695	0.446295	-0.28624	-0.448575	-0.348133	-0.138079	0.577905	-0.360606	-0.205061	-0.996884
Aradu.BQ4IU	-0.108694	0.139886	-0.38047	-0.106474	-0.550459	0.508795	0.379339	-0.999109	0.715649	0.172867	0.32558	0.561338
Aradu.BQ75L	-1.23842	0.741614	0.670316	-1.06429	-1.18858	-0.828737	0.467292	0.412372	1.11897	-0.0549948	0.482171	0.634837
Aradu.BS31B	-0.0667851	0.907049	0.323767	-0.105047	-0.356883	-0.416418	-0.284947	-0.736244	0.416178	-0.191909	0.379188	0.537447
Aradu.BW8X0	-0.677303	1.11838	1.10751	-0.408627	-0.957975	-0.763476	0.163408	0.0074614	0.815077	-0.124691	0.00974809	0.612801
Aradu.BY7GE	-0.242605	1.54818	1.1739	-0.0157062	-0.681084	0.342675	-0.698233	-0.393727	0.193506	-0.575038	-0.185052	0.37729
Aradu.BZN6F	1.12757	0.0940505	-0.775011	1.62346	0.888728	-0.505341	0.48052	-0.266621	-0.564695	0.943144	-0.944657	-0.913795
Aradu.C014T	0.356852	1.71704	-0.166853	0.00165159	-0.225496	-0.216542	-0.815704	-0.35192	0.347778	0.108249	0.396466	-0.326193
Aradu.C0KKX	-0.365352	1.40067	0.509109	-0.0679811	-0.800097	-0.807455	0.4084	0.053303	0.598479	-0.295986	-0.00968078	0.103749
Aradu.C114V	0.795043	-1.69094	-1.3576	0.531719	0.0576411	-0.485702	0.833192	0.184317	-0.437222	1.00818	0.282608	0.118789
Aradu.C25L8	0.926824	-1.12703	-1.38516	1.04942	1.04951	0.18329	0.189275	-0.245198	-0.667866	0.484146	-0.32917	-0.865075
Aradu.C474I	1.18899	-1.05367	-1.35008	1.14182	0.912604	-0.0220414	0.296119	0.0124939	-1.07313	0.383207	-0.399842	-0.358746
Aradu.C4GVN	-0.814523	0.859042	0.241057	-0.837058	-1.23502	-0.558066	1.03425	0.647496	0.463426	0.182444	0.46913	0.370669
Aradu.C4IJ9	-1.28655	-0.432591	0.310043	-0.968853	-0.645783	1.02629	-0.159786	-0.628208	0.652893	0.350838	0.953831	0.111703
Aradu.C4U4P	0.399154	1.33716	0.69655	0.413142	-0.675384	-0.675343	0.147025	-0.217201	-0.178734	-0.116018	-0.221332	-0.238216
Aradu.C5TRQ	1.25142	-0.743822	-1.0934	0.782197	0.957576	-0.133698	0.273055	0.704262	-0.667168	0.259055	-0.355503	-1.22302
Aradu.C5UM9	0.848491	-0.252007	-0.794101	0.440082	1.00402	-0.43829	0.188651	1.28826	-0.282463	0.276561	-0.551654	-1.11343
Aradu.C5Z2E	-0.393317	1.39396	-0.499538	-0.702427	-0.70132	-0.843783	0.707307	0.554756	0.265062	-0.0826214	0.200075	-0.0156993
Aradu.C674J	-0.0833521	1.20429	0.842595	0.0506523	-0.914239	-0.976589	0.262554	0.2821	0.611718	-0.201361	-0.0137407	-0.19081
Aradu.C6I2X	-0.198058	1.17895	0.841991	-0.80191	-0.606297	-0.781873	0.0270393	0.272402	0.700773	-0.0418786	0.240431	0.261855
Aradu.C6N0B	-0.599766	1.09953	0.819879	-0.520986	-0.773987	-0.264624	0.598608	0.247624	0.488782	-0.224146	-0.0637702	0.355173
Aradu.C6S8Z	0.0140797	1.11649	0.807527	-0.705823	-0.705599	-0.79483	0.0403365	-0.0324125	0.363503	-0.25509	0.131023	0.608495
Aradu.C6VT4	1.20813	-0.572973	-1.0548	1.09438	0.992758	-0.505068	0.0357587	0.0923976	-0.656518	0.450056	-0.73287	-0.988562
Aradu.C6W6J	-1.37982	-0.0451503	0.472038	-0.550726	-0.762549	0.124245	0.33129	-0.979976	0.967534	0.232501	0.771055	0.990785
Aradu.C7350	-0.709985	1.19309	0.922016	-1.17065	-0.825783	-0.197234	0.0805845	0.0364971	0.598911	-0.366396	0.216853	1.09944
Aradu.C7FFC	1.27445	-0.226965	-0.39076	1.32326	1.0651	-0.00384566	0.279163	-0.206606	-1.01304	0.0529301	-0.910161	-0.789257
Aradu.C7VL7	1.20135	-0.337002	-0.254012	-0.287083	0.727661	-0.311769	1.30987	0.416713	-0.549212	-0.0561943	-0.325146	-0.944363
Aradu.C824H	1.52191	-0.423965	-0.407112	1.66385	0.723557	-0.548036	-0.414738	0.00688002	-0.581569	0.211075	-0.497887	-1.24753
Aradu.C878I	-0.353768	1.26389	-0.306452	-0.277226	-0.492172	0.0660241	0.220281	0.477126	-0.00989425	-0.136379	0.12448	-0.387559
Aradu.C8ENE	1.08349	-0.117339	-1.16813	0.791795	0.780311	-0.704834	0.182361	0.67233	-0.359668	0.49185	-0.715336	-1.12261
Aradu.C8J1S	-0.708344	0.91833	-0.0516055	0.0314153	-0.19844	-0.175281	-0.219614	-0.848517	0.0103803	0.233889	0.0562082	0.553698
Aradu.C99J0	-0.422838	0.889418	0.690684	-0.529892	-0.689362	-0.747804	-0.103163	0.222055	0.879288	-0.326224	0.475133	0.577321
Aradu.CAE71	-0.784183	1.42631	1.35885	-0.73944	-0.827066	-0.0773727	-0.2152	-0.444962	0.686977	-0.497558	0.224885	0.50166
Aradu.CAM8W	0.6265	-1.19974	-0.727074	0.730592	0.337263	0.162139	-0.435131	1.02243	-0.678776	0.255509	0.329217	-1.09613
Aradu.CC1R3	1.01943	-0.769465	-0.727264	1.04507	1.01711	-0.216916	0.0861782	-0.359777	-0.832935	0.394834	-0.66926	-0.767982
Aradu.CE5SH	1.11918	-0.545337	-1.08766	1.34979	0.807418	-0.996766	0.512062	-0.246529	-0.158921	0.857467	-0.449287	-1.11016
Aradu.CF6WL	1.33975	0.238792	-0.515152	1.46171	1.05334	-0.188566	0.155112	-0.191228	-1.11262	0.48741	-0.921054	-1.2584
Aradu.CG16W	-0.115514	0.553684	0.695215	-0.0897077	-0.447844	-0.361909	-0.0329071	-0.563315	0.097454	-0.221185	0.519296	0.134516
Aradu.CGP4R	0.00889034	1.11445	0.960384	-0.10418	-0.392729	0.409723	-0.463146	-1.01161	0.300019	-0.225271	0.578813	0.537211
Aradu.CI03S	0.0101048	0.878221	0.871556	-0.141508	-0.435016	-0.282108	0.983452	-0.535695	-0.216404	-0.331935	0.0250056	-0.20683
Aradu.CI09B	-0.203656	0.844339	0.269391	-0.140705	-0.673625	-1.35438	1.18733	-0.258623	-0.0785799	0.55307	0.249387	-0.0778222
Aradu.CJT43	0.889977	-0.734436	-1.11594	0.867193	1.01482	-0.216997	-0.134012	0.250009	-0.692357	0.4088	-0.240359	-1.25438
Aradu.CKG3H	-0.463374	0.998292	0.537893	-0.103664	-0.512918	-0.762677	0.617593	-0.504942	0.452463	-0.00875723	0.0859457	0.343628
Aradu.CLQ9M	1.25656	-0.778643	-1.06628	1.23652	1.11016	0.469701	0.108567	-0.233271	-1.06256	0.318074	-0.503826	-1.18415
Aradu.CM4P8	0.962581	-0.727082	-0.74032	1.48323	1.0638	0.361233	-0.0615257	-0.476551	-0.950452	0.483425	-0.64764	-0.832346
Aradu.CMN1L	0.877616	-1.10681	-1.19169	0.817129	0.923285	0.620557	0.526313	-0.607354	-0.919421	0.270829	-0.225039	-0.27912
Aradu.CN01H	1.09267	-0.880087	-1.66031	0.99305	0.85641	-0.0366884	0.513457	0.285495	-0.750841	0.654195	-0.0966255	-1.05688
Aradu.CN1WR	0.792352	0.0841458	-0.92309	0.544182	0.887331	-0.274909	0.20695	0.675864	-0.418588	0.655319	-0.774453	-1.09171
Aradu.CPZ9B	0.344211	0.21438	-0.572788	0.515664	0.642344	0.44022	-0.586452	-0.857877	-0.381848	-0.288724	0.777274	0.464309
Aradu.CSC4F	-0.117851	-0.117851	-0.117851	-0.117851	-0.117851	-0.117851	-0.117851	-0.117851	-0.117851	1.57921	-0.117851	-0.117851
Aradu.CST5R	-0.763234	1.00428	0.941805	0.0248776	-0.668795	0.00837131	0.354912	-0.395265	0.384061	-0.31715	-0.00441169	-0.183142
Aradu.CT21N	0.189452	0.280341	-0.545145	0.0910633	-0.162978	-0.313303	0.470938	-0.060003	0.463136	-0.0952489	-0.429416	0.342607
Aradu.CT5EJ	-0.345694	0.329066	1.04903	-0.427605	-0.11518	0.882642	-0.384255	-1.23465	-0.329336	-0.669675	-0.00647608	1.17935
Aradu.CTG46	0.800395	-0.904412	-0.804309	1.23975	1.13452	0.131031	-0.287005	-0.361348	-0.709315	0.705299	-0.499233	-0.941878
Aradu.CU20J	0.33235	1.05885	0.394918	1.07612	-0.896539	-0.875515	0.721752	-0.0551549	0.373935	0.0413232	-0.239321	-0.375195
Aradu.CU6CK	0	0	0	0	0	0	0	0	0	0	0	0
Aradu.CW6HR	1.1206	-0.459051	-1.48138	1.1927	0.835676	-0.164831	0.194643	-0.129664	-0.400514	0.696942	-0.272947	-1.33635
Aradu.CX05K	0.295236	0.95145	0.801636	-0.499633	-0.427657	-0.021083	-0.0988282	-0.772499	0.184513	0.476154	-0.0292826	0.129885
Aradu.CXJ5P	1.24042	-0.717917	-1.25748	1.15532	0.791357	-0.503209	0.15524	0.339871	-0.824369	0.471354	-0.537755	-0.66584
Aradu.CYS3J	0.526004	-0.165619	-0.427116	0.14226	0.836179	-0.579837	-0.298845	0.633424	-0.271074	0.0965644	-0.601541	-0.820003
Aradu.CZD45	-0.117851	-0.117851	-0.117851	-0.117851	-0.117851	-0.117851	-0.117851	-0.117851	-0.117851	-0.117851	-0.117851	-0.117851
Aradu.D0FCJ	-0.479555	0.814998	1.07658	-0.679029	-1.1006	-0.30401	-0.0528943	-0.131536	0.771899	-0.174113	0.518532	-0.289223
Aradu.D0L18	-0.741625	1.11967	0.938508	-0.736676	-0.875342	-0.416525	-0.330584	-0.172389	0.884028	-0.505264	0.0879249	0.777411
Aradu.D14Q2	-0.408346	-0.322683	-0.483339	-0.453392	1.08202	0.993186	-0.687952	-0.776691	-0.59286	-0.309791	0.594275	0.879141
Aradu.D14WA	-0.051908	1.54703	0.443775	-0.208607	-0.430684	-0.613536	0.789137	0.52053	-0.00674341	-0.313805	-0.0798374	-0.642953
Aradu.D1DYZ	-0.410807	1.3268	0.845791	-0.421459	-1.01111	-0.75721	0.296569	0.708091	0.445591	-0.0462906	0.144149	-0.337426
Aradu.D1ZWK	0.988521	-0.760896	-0.741219	1.36867	1.12306	-0.0202213	-0.07959	-0.669818	-0.819684	0.236584	-0.611923	-0.693588
Aradu.D252Q	1.48149	-0.52324	-0.577962	1.36409	1.10764	-0.249814	-0.236362	-0.738852	-0.74392	0.257368	-0.733763	-0.990047
Aradu.D2I4Y	-0.633053	0.927611	1.34094	-0.447063	-0.987319	-0.940447	0.439613	-0.238522	0.53316	0.060417	0.190511	0.128495
Aradu.D2J87	1.09019	-0.955309	-0.938784	1.08993	0.93341	-0.425836	0.792218	0.141428	-0.63072	0.464399	-0.373708	-1.17527
Aradu.D2XUT	1.14395	-0.786807	-0.792416	0.972228	1.29361	0.0792249	-0.106786	-0.49161	-0.69385	0.539878	-0.566386	-0.743484
Aradu.D3JKD	0.128213	1.46084	0.598425	-0.276232	-0.62552	-0.443677	0.394343	-0.334996	0.182778	0.156015	0.118754	-0.255998
Aradu.D6AKV	0.348059	1.13572	0.268919	-0.182257	-0.576237	-1.22768	0.37049	0.448831	0.443133	0.149828	0.159593	-0.213016
Aradu.D6JKJ	-0.927004	0.649685	0.180512	-0.528373	-1.10193	-0.731019	1.21026	0.0876467	0.528367	0.563734	0.350177	0.321292
Aradu.D6SVB	0.651686	-0.593898	-1.4002	1.27091	0.814183	-0.423742	0.711013	0.0751475	-0.670256	0.576847	-0.249609	-1.05859
Aradu.D7090	0.902932	-0.485263	-1.49174	0.983429	0.760209	-0.488566	0.482144	0.564619	-0.569337	0.656939	-0.365743	-1.11755
Aradu.D79RM	-0.79952	0.786412	-0.676385	-0.24372	0.114614	0.916952	0.318609	-0.989863	-0.240127	-0.203198	0.728461	0.713375
Aradu.D7NJ0	0.749285	-0.331914	-0.61956	0.91068	0.867816	0.213473	-0.217361	-0.130319	-0.492874	0.292449	-0.683394	-0.873947
Aradu.D80L9	-0.214345	0.940658	-0.0542571	0.38497	0.0318571	-0.647231	0.728935	-0.964775	-0.114717	-0.4363	0.112728	0.0837325
Aradu.D8IBM	-0.288273	-0.256816	0.102044	0.181752	-0.56601	0.00160307	0.160159	-1.09521	0.636422	0.189573	0.626035	0.114963
Aradu.D93D9	-0.249199	1.50129	1.15237	-0.437478	-0.543306	0.164787	-0.410778	-0.77335	0.0554711	-0.793901	0.369553	0.357721
Aradu.D9BGT	0.468848	0.757121	0.121023	1.20189	0.0116657	-0.272191	-0.592676	-1.28898	-0.133067	0.0269779	0.00803397	-0.457369
Aradu.D9IA6	-0.660248	1.72474	0.219804	-0.518235	-0.564489	-0.520198	0.385377	0.478588	0.606602	-0.066854	0.0557952	0.0295592
Aradu.D9WZF	-0.358123	0.344143	-0.372641	0.179286	0.956697	1.31801	-0.528547	-1.28453	-0.904393	-0.452066	0.210149	1.06863
Aradu.D9XCS	-0.442805	0.350339	-0.21881	-0.104282	-0.841637	-0.906233	1.36104	-0.156753	0.325698	0.576638	0.356526	0.204533
Aradu.DA91A	-0.0104486	-0.485251	1.12046	-0.427935	-0.272085	-0.215153	-0.443269	-0.925284	0.882736	-0.155498	0.281644	0.0574035
Aradu.DAC4M	-0.572049	0.682928	0.612124	-1.51879	0.0900219	0.490229	-0.64553	-0.152924	0.276749	-0.72702	0.786394	-0.0271875
Aradu.DAT06	1.71089	-0.955064	-0.914095	1.12504	1.10088	-0.409801	0.140191	-0.296605	-0.892915	0.155581	-0.6575	-0.768834
Aradu.DAV01	0.840816	-0.880661	-0.999539	0.929194	1.04006	0.208262	0.0580471	-0.169783	-0.689634	0.40729	-0.595489	-0.972751
Aradu.DB8XT	1.23913	-0.388634	-0.7216	0.708197	0.611005	-0.458479	0.126344	0.338975	-0.759696	0.262765	-0.58918	-0.767427
Aradu.DBP4R	0.41215	-0.713053	-0.901827	1.03465	1.17874	-0.356398	0.00486863	-0.351787	-0.694164	1.0244	-0.548858	-0.217762
Aradu.DCK7U	-0.128272	-0.325808	-0.175985	0.20921	0.0443549	0.664768	0.171308	-1.32822	-0.242185	0.309417	0.356082	0.0993715
Aradu.DD99U	0.714681	-1.1557	-1.21325	0.808908	0.939977	-0.149072	0.552737	-0.0383331	-0.581373	0.945408	-0.326912	-1.00944
Aradu.DDG3L	0.281574	-1.4724	-1.14801	0.191612	0.77549	0.538025	0.380658	0.222255	-0.930478	0.450289	0.267957	-0.074491
Aradu.DE1FP	-0.236083	1.03995	-0.335532	-0.53548	-0.254749	-0.0345261	0.672456	0.599989	0.308222	-0.206291	-0.684471	0.0616914
Aradu.DF8UA	-1.26915	1.40391	1.21795	-0.942506	-0.987997	-0.551796	-0.0370904	0.263741	0.795665	-0.11955	0.330611	0.424487
Aradu.DFV35	1.28404	-0.955829	-0.80402	0.874953	0.86914	-0.648784	-0.0702189	0.521861	-0.371487	0.559506	-0.588526	-1.06392
Aradu.DGR2N	0.131836	-0.39201	-0.88174	-0.663605	0.580395	-0.0181128	0.457274	1.36671	-0.391871	-0.276919	-0.48042	0.430584
Aradu.DH0VD	-1.02218	-0.83587	-0.917604	-1.07991	-1.07321	-1.0666	1.03805	1.06042	0.961864	1.11675	0.91588	0.833271
Aradu.DH725	-0.639295	0.636681	-0.0782366	-0.798904	-0.665668	-0.270621	0.580769	0.0191689	0.628102	-0.178813	0.608179	0.770134
Aradu.DH9ES	-0.269319	0.894219	0.637612	0.0963428	0.00635105	-0.876364	0.290815	-0.575196	0.0561129	0.341939	0.268805	-0.285364
Aradu.DI7FZ	1.25024	-0.61971	-0.866965	1.18759	0.907095	-0.390911	0.40081	-0.0754435	-0.404016	0.765502	-0.681638	-1.28637
Aradu.DI897	-0.0860652	-0.787708	-1.98747	0.186678	0.0231347	-0.858495	1.05199	1.21165	0.195179	0.959137	0.411921	-0.396696
Aradu.DI89V	1.1055	-0.298045	-0.855798	1.17744	1.35614	-0.307266	0.341455	-0.207126	-0.932465	0.412593	-0.944325	-1.08239
Aradu.DJ654	-0.333591	0.109318	0.740695	-0.400614	-0.364698	0.408503	-0.735558	-0.759384	-0.19057	-0.828142	0.41171	1.46307
Aradu.DJZ9J	0.0991507	0.40303	-0.332781	0.029207	0.72652	1.13349	-0.851673	-1.15006	-0.539529	-0.252691	0.404236	0.56899
Aradu.DK5WH	-0.427272	0.968083	0.834704	-0.362029	-0.813565	-0.865809	0.607586	-0.0737771	0.791901	0.0301673	0.0729468	0.28261
Aradu.DL5VG	-0.122826	0.556847	0.357134	-0.155938	-0.425451	-0.854064	0.504233	-0.507593	0.431388	0.0518116	0.309503	-0.127511
Aradu.DLG8U	-0.110107	0.681748	0.689218	0.134048	-0.910767	-0.934151	0.104733	-0.28025	0.768621	0.245364	0.0922633	0.390655
Aradu.DLN3B	1.18626	-0.657778	-0.977194	0.841766	1.19516	-0.372417	0.313484	0.333894	-1.1471	0.18363	-0.410418	-0.460188
Aradu.DM4CY	-0.551405	1.01141	0.754367	-1.28385	-0.985531	-0.717172	0.695221	0.69111	0.6441	-0.0166967	0.489507	-0.123961
Aradu.DMV9T	0.313822	0.384189	1.06364	-0.193627	-0.30807	-0.486857	-0.459484	-0.499855	-0.295387	-0.993379	0.621642	0.711422
Aradu.DN043	-0.269572	0.383834	1.20345	-0.614361	-0.444729	-0.0696855	-0.150725	-0.786665	0.189372	-0.230917	0.629779	-0.356968
Aradu.DN2D2	-0.302892	0.309056	0.38362	0.518741	-1.25619	0.0393936	0.936639	-0.770694	-0.14783	0.0858246	-0.101822	1.10878
Aradu.DS35R	-0.304473	1.59414	1.06478	-0.148808	-0.849834	-0.630161	0.0919036	-0.350118	-0.131468	-0.365957	0.19417	0.83708
Aradu.DSS3T	0.204185	-0.72086	-1.15337	0.917628	0.680514	-0.251591	1.06811	-0.543081	-0.755727	1.11	-0.567816	0.12569
Aradu.DT20E	1.26051	-0.498761	-1.05643	1.29885	0.858673	-0.287833	0.146895	0.316208	-0.453008	0.815918	-0.618305	-1.23799
Aradu.DT2NS	-0.769129	1.15462	0.714486	-0.582834	-1.03099	-0.852237	0.0608361	0.506973	1.01515	-0.0241671	0.367303	0.408889
Aradu.DT95E	-0.787163	1.01742	1.00371	-0.89048	-0.59156	-0.477805	0.106327	0.3213	0.530322	-0.868866	0.30527	0.406927
Aradu.DUE48	-0.0828024	-0.559431	-0.559431	0.320941	1.14451	-0.0591182	0.38783	-0.206284	-0.559431	0.375509	-0.381024	-0.559431
Aradu.DUI6G	0.736992	-0.646059	-1.08079	0.327331	0.256068	-0.220903	0.787467	0.630852	-1.17323	0.613546	-0.401282	-0.0864505
Aradu.DXN0X	-0.866685	1.39062	0.543625	-0.198123	-1.02752	-0.30718	0.185455	-0.418826	0.433052	-0.256404	0.284142	1.33115
Aradu.DXP84	1.36297	-0.596528	-0.723787	1.16702	0.886234	-0.547602	0.68264	0.169546	-1.05107	0.484266	-0.779559	-1.17555
Aradu.DXR7E	-0.818444	-0.13879	0.538556	0.510136	0.470222	0.350426	0.143507	-1.60049	-0.179225	-0.748672	0.655354	-0.20311
Aradu.DXW6X	0.422865	-0.83281	-0.829238	0.779326	0.533852	-0.205814	1.04584	-0.519055	-0.413882	0.955102	-0.505718	-0.583146
Aradu.DY35H	-1.11125	0.634233	0.692038	-1.0297	-0.8079	0.458211	-0.482325	-0.384915	0.717319	-0.47661	0.293421	1.86409
Aradu.DY43A	0.490995	-0.0186369	0.05943	1.53455	-0.403812	-0.559706	0.329312	-0.931301	-0.218713	0.333184	-0.0336721	0.0264484
Aradu.DZ0GE	0.897749	1.38359	-0.118728	0.495396	-0.197431	-0.609642	-0.0878449	0.0553996	-1.0157	0.106869	-0.029591	-0.0426172
Aradu.DZ58R	-0.934123	0.563561	0.459249	-0.910812	-0.45394	0.0876229	-0.407864	0.0182828	0.964534	-0.590198	0.705746	0.644613
Aradu.E01RJ	-0.472904	0.649151	0.526244	-0.717501	-1.27841	-0.518069	0.525525	0.669928	0.751039	-0.299961	0.425703	0.498931
Aradu.E085S	-0.795314	1.305	1.15463	-0.249113	-0.0300545	-0.0420772	-0.630158	-0.751832	0.588429	-0.784059	0.131846	0.0462511
Aradu.E09F7	-0.673354	1.00666	0.521668	-0.730998	-0.680778	-0.16379	-0.267988	-0.401469	0.575813	-0.0308954	-0.0500349	1.23863
Aradu.E0GLY	0.926174	-0.677284	-0.587348	0.608598	0.870048	-0.219109	-0.109915	0.573668	-0.548697	0.551947	-0.339465	-1.14128
Aradu.E0Q62	0.173878	-0.731005	-0.714535	0.469952	0.551885	-0.36599	1.17821	-0.524302	-0.345904	1.1617	-0.339905	-0.63961
Aradu.E16S5	-0.70238	0.920362	1.15706	-0.562983	-0.423567	0.569915	-0.101458	-0.630808	-0.44124	-0.769305	0.520343	0.811321
Aradu.E1GHD	1.1138	-0.717349	-1.14077	1.10222	0.94018	-0.359326	0.0591473	0.01067	-0.570982	0.652239	-0.394018	-1.40605
Aradu.E1NHL	0.123675	0.0225536	-0.159899	0.214149	0.130277	0.187002	0.32018	-0.831741	-0.939912	0.221924	0.465745	0.682035
Aradu.E1P3F	-0.72183	0.397358	0.710635	-0.952056	-0.903554	-0.920199	0.428397	0.847241	0.741643	-0.54935	0.57083	0.319199
Aradu.E2BAC	0.852326	0.479429	-0.574521	0.995336	0.949518	-0.428976	0.0711798	0.233219	-0.650544	0.131986	-0.997476	-0.749531
Aradu.E4H6E	-0.301892	1.26182	0.470096	0.538351	-0.707021	-0.203344	-0.0801373	-0.411781	0.436675	-0.250556	-0.137617	-0.18934
Aradu.E4IUB	-0.790709	0.924405	-0.147809	-1.03739	-0.414484	0.158311	0.124391	0.202304	0.604792	-0.100303	0.531618	0.610344
Aradu.E4PH8	-0.124521	0.879909	1.37198	-0.596873	-0.368458	-0.826702	0.0464444	0.457397	-0.117334	-0.58627	0.0733119	-0.209803
Aradu.E4PRW	-0.718517	0.624249	0.302852	-0.574307	-0.630374	-0.636153	0.31276	0.111237	0.902044	-0.346678	0.391726	0.129483
Aradu.E52Z4	1.05304	-0.860393	-1.4852	0.572429	1.23994	-0.139202	-0.278671	0.317951	-0.384484	0.670816	-0.2473	-0.562635
Aradu.E5HF7	-0.307999	0.274368	0.66741	-0.184591	0.625032	1.06939	-0.0121422	-1.03706	-1.13691	-0.748051	0.367584	0.0901536
Aradu.E6113	0.756637	-1.09234	-0.805742	0.0855956	0.535764	-0.323573	-0.187135	0.0100598	-0.261862	0.0173778	-0.0211299	0.799706
Aradu.E6676	-0.487013	0.820084	0.462936	-1.029	-1.05128	-0.493304	0.656023	0.0376332	0.0621692	0.00656495	0.479124	0.496155
Aradu.E6JAQ	-0.933134	0.859062	0.269357	-0.8701	-0.693403	0.36144	0.0998493	-0.57477	0.262147	-0.620014	0.858743	1.51215
Aradu.E76CI	-0.530234	0.743387	0.363422	-0.868036	-0.170931	-0.0176393	-0.158942	0.276666	0.177499	-0.507812	0.316528	1.04045
Aradu.E7D7B	0.818061	-0.813708	-0.598177	1.11874	1.04997	0.117641	-0.401399	-0.321745	-0.586429	0.174132	-0.479054	-0.743712
Aradu.E8PFY	-0.0451169	-1.10046	-1.31718	-0.133776	0.467644	-0.0749425	0.837768	0.798952	-0.356533	0.566675	-0.00642691	-1.07955
Aradu.E8W7M	-0.485482	1.28032	0.667944	-0.897376	-0.852288	-1.17347	0.552138	0.625853	0.796161	-0.228816	0.0832899	0.249056
Aradu.E8YHH	0.735246	-0.646064	-1.29261	-0.130433	0.824475	-0.434088	0.229506	0.60498	-0.761211	0.481374	-0.166091	-0.730316
Aradu.E977D	-0.71479	1.01046	0.77205	-1.25721	-0.833529	-0.197103	-0.173433	0.518266	0.825592	-0.533783	0.563855	0.297175
Aradu.E99UV	-0.577607	0.136911	-0.170442	-0.577187	0.0890529	1.11155	-0.539691	-1.17632	-0.146598	-0.357789	0.755441	1.36487
Aradu.E9DCA	1.00774	-0.754142	-1.62163	0.89215	1.0144	0.295032	0.269729	0.0657206	-0.492945	0.314192	-0.153283	-1.02463
Aradu.EC4M1	-0.675654	0.350674	0.396634	0.0706746	-0.205603	-0.234074	0.707952	-0.916001	0.210682	0.243414	0.643169	-0.0258932
Aradu.EDD9R	-0.4201	-1.43409	-0.984516	-0.484316	0.455645	-0.0430471	0.674516	0.373406	-0.548032	0.69494	0.490243	-0.114114
Aradu.EF2HR	0.828748	-0.973812	-0.718866	0.792645	0.895366	-0.429549	1.07688	-0.310919	-0.734601	1.04256	-0.430316	-0.664879
Aradu.EF5K9	-0.108717	-0.112492	-0.641207	0.157362	0.809338	1.00484	-0.577302	-0.941006	-0.771106	-0.0870954	0.282506	0.927775
Aradu.EG2K3	1.20098	0.199669	-0.848466	0.69831	1.05673	0.275039	-0.801835	0.0724479	-0.459919	-0.398881	-0.885234	-0.525687
Aradu.EH11Z	1.04807	-0.273153	-0.987916	1.00274	1.08098	-0.191008	-0.31434	0.0312125	-0.589855	1.08835	-0.60526	-0.937321
Aradu.EH8VM	0.835008	-0.798289	-0.963007	1.16548	1.25141	0.364575	-0.251623	-0.642139	-0.89416	0.55266	-0.268981	-0.816929
Aradu.EI58K	-0.355377	-0.74337	0.0314122	-0.0249036	-0.200769	0.583368	0.639227	-1.15191	0.0839141	0.451829	0.713677	-0.155337
Aradu.EIB6X	-0.443013	-0.150813	1.08034	-0.145284	-0.845094	0.281335	0.0512592	-0.379796	0.14572	-0.257512	0.503027	-0.052319
Aradu.EIR9Y	0.0804038	0.799528	0.112255	0.0873834	0.189764	-0.46196	0.731655	0.167243	0.0967286	-0.218997	0.0146112	-0.380429
Aradu.EJ09V	0.772779	0.43479	0.0819905	1.10373	-0.43478	-0.544223	0.260315	-1.24005	-0.140219	0.187506	0.0275981	-0.586161
Aradu.EK7NB	-0.22546	0.276953	-0.250261	-0.242967	-0.49973	-0.587269	-0.222807	-0.0627949	1.11085	0.365154	0.0867637	0.517767
Aradu.EL0FF	0.869688	-0.857201	-0.796448	0.479435	0.866229	-0.0553109	0.736962	-0.461876	-0.762587	0.521882	-0.537565	-0.800246
Aradu.EL4D3	1.09712	-0.148369	-0.908965	1.05875	1.01591	-0.296395	0.272178	0.421085	-1.26777	0.371726	-0.461091	-1.08975
Aradu.EL81N	1.12209	-0.462576	-1.16256	1.18151	0.854636	-0.552368	0.617892	0.633392	-0.836167	0.345752	-0.538874	-1.16338
Aradu.ELK9H	1.35388	0.0188004	-1.1128	0.888211	1.19862	-0.849035	-0.171504	0.402144	-0.484711	0.530457	-0.675234	-0.930697
Aradu.EMM34	-0.926731	0.813442	0.71196	-1.24857	-0.795272	-0.962749	0.531404	0.737503	0.563812	-0.187659	0.761424	0.209645
Aradu.EMU7W	-0.583701	1.52988	1.3735	-0.439071	-0.833414	-0.0213851	-0.188509	-0.344173	0.060728	-0.557459	-0.0377068	0.84004
Aradu.EP05F	-0.562713	0.446566	1.95498	-0.154708	-0.45468	0.345048	-0.00869942	-0.688362	-0.767753	-0.380366	0.138447	0.0242192
Aradu.EP24T	-0.108836	-0.705977	-0.437717	0.026088	0.167921	1.11461	0.0505233	-1.244	-0.573433	-0.0913262	0.860343	0.432967
Aradu.EQ3HU	-0.183667	1.1639	1.13163	-0.745857	-0.694526	-0.532686	-0.53454	0.384705	0.803466	-0.672381	0.30715	0.117891
Aradu.ER2FJ	-0.0382535	0.452572	0.264351	0.392715	-0.652518	-0.895204	0.607145	-0.539935	0.917959	-0.260104	-0.323773	0.846347
Aradu.ER2GU	1.27438	-0.836864	-1.0845	1.45386	1.10033	-0.0764241	0.460815	-0.33472	-0.655977	0.430274	-0.472543	-1.05671
Aradu.ER7XF	-0.652468	0.733977	0.716605	-0.682616	-0.784366	-0.491237	-0.13513	0.44237	0.377915	-0.313589	0.548214	0.064596
Aradu.ES65V	1.16017	-0.952384	-0.979655	1.45559	1.08733	-0.0432449	0.0518747	-0.344827	-0.868568	0.217017	-0.595367	-0.923181
Aradu.ET8VH	0	0	0	0	0	0	0	0	0	0	0	0
Aradu.EU2CT	-0.320934	0.945367	0.533579	-0.258448	-0.950535	-0.655614	0.388023	-0.432818	0.176873	-0.170938	0.0382392	0.0167489
Aradu.EV49X	0.580426	-0.763618	-0.770432	0.994761	1.24576	0.159882	-0.353022	-0.595201	-0.673604	0.517357	-0.720178	-0.753242
Aradu.EV762	0.905552	-0.630702	-0.134013	1.41234	0.535517	-0.0383656	0.115408	-1.34348	-0.875624	-0.306838	-0.215631	-0.471314
Aradu.EWB3L	1.06066	-0.0779655	-0.906218	1.15388	0.878127	-0.297689	-0.28218	0.329187	-0.649281	0.680173	-0.780178	-1.13575
Aradu.EX30Z	0.815483	-0.644648	-0.333308	1.50822	0.889133	0.546438	0.303115	-0.690127	-0.855128	-0.10872	-0.939337	-0.917557
Aradu.EXC3L	1.1464	-0.503311	-1.31782	0.953733	0.896898	-0.207779	-0.0264832	-0.288792	-0.672803	0.467257	-0.174869	-0.924893
Aradu.EY96Y	0.180901	0.223025	0.00628584	0.955634	-0.343362	-0.0568629	0.267081	-0.996951	-0.205909	0.454306	-0.0257097	-0.717916
Aradu.EYQ2A	1.18858	-0.660079	-1.13199	0.97533	0.341528	-1.16202	0.445406	0.618396	0.0390221	0.560735	-0.0171208	-1.03017
Aradu.EZ25P	1.01549	-0.893924	-1.65958	0.949526	0.928613	-0.309694	0.422661	0.387334	-0.540774	0.76906	-0.0945142	-1.13057
Aradu.EZ7WI	-0.401801	1.31029	0.749156	-0.98088	-0.861733	-0.446048	-0.226346	0.942171	0.666157	-0.466041	0.319981	0.0955028
Aradu.F05R2	1.17322	-0.462603	-0.437186	1.16091	0.783277	-0.218845	0.730792	0.208024	-0.888158	0.648409	-0.619105	-1.49087
Aradu.F0EVB	-0.524039	1.47272	-0.674528	-0.238103	-0.0587083	-0.870579	0.400202	0.678408	0.836828	0.196057	0.472732	-0.222692
Aradu.F19Z7	0.658145	-0.761155	-0.801636	1.24165	0.393315	-0.343778	0.844023	-0.561142	-0.633062	1.05063	-0.703219	-0.58
Aradu.F2DYX	-1.08331	0.573566	1.07097	-1.09872	-0.889712	-0.769362	-0.509191	0.330999	0.963813	-0.202791	0.466662	0.662132
Aradu.F2KAM	0.803869	-0.255572	-0.318824	0.112233	-0.0391549	0.0532822	0.346903	-0.764307	-0.117952	-0.210243	0.541105	0.523907
Aradu.F42CN	1.23369	-0.503572	-1.37948	1.16241	0.69369	-0.740176	0.851904	0.582561	-0.64048	0.629002	-0.551572	-0.745405
Aradu.F48KW	-0.299913	0.614034	0.395152	-1.35068	0.0341864	-0.113624	-0.670555	-0.56847	0.761532	-0.0661351	1.45113	0.255807
Aradu.F4VRK	-0.411987	1.03953	0.25347	0.376627	-0.229898	0.220749	0.500715	-0.156826	0.0986127	-0.594285	-0.174799	0.238051
Aradu.F510W	1.12474	-0.904865	-1.21047	1.15811	0.964436	0.0851339	0.532219	-0.432243	-0.90694	0.531557	-0.271228	-0.916341
Aradu.F5D10	1.08157	-1.18811	-1.23899	0.846943	1.06137	-0.423163	0.16584	0.511226	-0.590244	0.53309	-0.185997	-1.40789
Aradu.F6R0D	-0.940893	-1.22123	-1.09784	-0.661439	-0.702351	-1.06321	1.20469	1.18727	0.882191	1.21907	0.828125	0.668267
Aradu.F70UL	-0.368905	0.189347	0.0872235	0.186861	0.502876	1.01953	0.0642809	-1.45859	-0.748802	-0.300882	0.0841402	0.344014
Aradu.F8E8Y	0.723159	0.385258	0.347601	1.23105	-0.205107	0.155747	-0.215778	-0.673416	-0.318409	0.717368	-0.875518	-0.131669
Aradu.F8MV2	-1.1591	0.730869	0.544744	-0.637098	-0.871624	-0.897925	1.02193	-0.337328	0.392259	0.509831	0.774501	0.803738
Aradu.F8PBT	1.19344	-0.5339	-0.867997	0.8949	1.14823	-0.567519	-0.128871	0.927283	-0.373115	0.255875	-0.515081	-1.26351
Aradu.F99CN	0.050803	-0.894831	-0.405477	-0.293853	1.14299	0.582803	0.608618	-0.18718	-0.153692	-0.0872227	-0.0338724	-0.700677
Aradu.F9LPP	0.270364	-0.512469	-0.512469	0.28991	1.24468	0.304354	-0.426913	-0.428917	-0.512469	0.0149751	-0.512469	-0.453707
Aradu.F9Z2G	0.781689	-0.359939	-1.3757	0.59255	1.15809	-0.553637	0.402638	0.709571	0.0816268	0.0830865	-0.545002	-0.676092
Aradu.FB002	1.17792	-0.00648373	-0.762096	1.10773	0.41112	-1.24113	0.0122349	1.01402	-0.511986	0.447214	-0.572904	-0.712283
Aradu.FB522	-0.603475	0.750103	0.679648	-0.428082	-0.808487	0.318438	-0.383246	-0.669325	0.527282	-0.21738	0.6207	0.129081
Aradu.FBW4Q	0.871997	-0.18586	-1.21081	1.02342	0.972744	-0.800834	0.400884	0.277277	-0.47932	0.425135	-0.464646	-1.05579
Aradu.FC5JP	1.30927	-0.516125	-0.910983	1.49888	0.830376	-0.377033	0.399041	-0.29471	-0.580442	0.658783	-0.694802	-1.32126
Aradu.FCC2M	0.428215	-1.6822	-1.20055	0.18746	0.868785	0.678555	-0.12262	0.0724987	-0.249257	0.34206	-0.155512	-0.853162
Aradu.FD81T	-0.841639	0.0360821	-0.201181	-0.917108	-0.552515	-0.673063	0.101506	0.0705304	0.629851	0.129072	1.58985	0.585841
Aradu.FEQ9B	-0.712468	0.46251	0.624403	-0.725025	-0.592153	0.595567	0.119028	-0.333806	0.31692	-0.0733504	0.682062	0.383391
Aradu.FEU7J	0.818142	-0.820294	-0.997367	1.3194	0.929015	-0.298082	0.0138036	-0.0633911	-0.737015	0.701799	-0.53094	-0.854635
Aradu.FEY54	-0.74816	1.0245	0.0948944	-0.829732	-0.516904	-0.511107	0.535059	0.256646	1.01677	-0.304819	0.298747	0.302348
Aradu.FF3VB	0.424934	1.70853	-0.483689	0.129374	0.38967	0.0415514	-0.216344	-0.89005	-0.686352	-0.0946343	-0.15055	0.581376
Aradu.FF4D5	1.27698	-0.187001	-0.648879	1.48453	0.898001	-0.694551	0.10417	0.520352	-0.615299	-0.229513	-0.482459	-1.19693
Aradu.FGZ7G	-0.215983	-0.0844457	-0.0456744	0.115282	-0.0100534	0.833978	-0.333075	-1.4746	0.141546	-0.381418	0.580845	0.890133
Aradu.FHH9D	-0.218627	0.938926	0.372282	0.410295	-1.10165	-1.41902	0.347446	0.0446761	0.911885	0.427464	-0.0517996	0.224625
Aradu.FII5X	-0.753376	1.20269	-0.138798	-0.177816	-0.361665	0.582179	0.848635	-0.429835	-0.615852	-0.45381	0.210048	0.677485
Aradu.FJ3E7	-0.81408	0.625398	0.590623	-0.63361	-0.190051	0.864858	-0.915689	-0.898665	0.326322	-1.05932	0.602982	1.50998
Aradu.FJ5FU	0	0	0	0	0	0	0	0	0	0	0	0
Aradu.FKD86	-0.411409	0.883334	1.08214	-0.743531	-0.368333	-0.434637	-0.342341	0.0135902	0.33221	-0.443857	0.300816	-0.5941
Aradu.FMR9S	-0.584625	0.67119	0.769665	-0.76092	-0.92657	-0.239308	-0.535703	0.314735	0.671738	-0.309334	0.56849	-0.152023
Aradu.FP3TI	-0.960307	0.764198	1.05822	-0.197648	-0.188229	-0.0859165	-0.511431	-0.881246	0.582693	-0.431528	-0.212679	0.238801
Aradu.FPU47	0.658945	-1.0519	-0.948778	0.787614	0.669655	-0.0443042	0.840303	-0.60126	-0.471074	0.719374	-0.62746	-0.648464
Aradu.FQ6XD	1.34537	-0.774017	-0.92773	1.68244	0.975378	-0.455708	0.0423247	-0.387301	-0.75355	0.559411	-0.604619	-0.812173
Aradu.FT4US	-0.345388	-0.12929	-0.368975	-0.187694	-0.237904	1.0531	-0.276829	-1.10791	0.0971426	-0.322933	0.764106	0.810402
Aradu.FUI4A	-0.13598	1.29352	1.0184	-0.198933	-0.776081	-1.07144	0.394054	0.101935	0.394937	-0.0797015	-0.321594	0.232027
Aradu.FUK65	0.659169	1.35139	0.483481	0.847025	0.206106	0.84672	-0.607946	-0.613284	-0.69673	-0.765852	-0.616388	-0.940425
Aradu.FW4A8	-0.41434	1.36859	1.3606	-0.57261	-0.841925	-0.00485721	-0.0760363	-0.645512	0.368553	-0.455709	0.511702	0.533599
Aradu.FX47V	0.934779	-0.701534	-0.519487	0.332226	0.544133	-0.315034	0.802326	-0.381833	-0.472222	0.953889	-0.601576	-0.701534
Aradu.FXG2U	-0.0365326	0.812353	-0.137646	0.267101	-0.961399	-0.619909	0.712132	-0.338334	0.493903	0.142593	0.312024	-0.0576819
Aradu.FZ70I	0.0543494	1.79534	0.0910243	0.0139351	-0.681004	-1.31542	0.458722	-0.124856	0.580075	-0.0561776	0.0609163	0.0258228
Aradu.G013M	1.33651	-0.18308	-0.647668	1.67677	0.149239	-0.419126	-0.0944951	0.278199	-1.0243	0.552585	-0.437423	-0.965488
Aradu.G028X	-0.311563	0.803147	-0.196199	-0.883766	-0.220098	0.149465	-0.357507	-0.103558	0.468099	-0.615014	0.928131	0.297086
Aradu.G0I33	-0.0362878	-0.653315	-0.653315	0.423226	0.759256	0.347084	0.154484	-0.108797	-0.531266	0.451842	-0.44477	-0.653315
Aradu.G0QWJ	-0.271627	1.29114	0.718728	0.33829	-0.699609	-0.865488	0.0464294	0.0483787	0.58321	-0.350985	-0.202647	0.0121343
Aradu.G1BFV	-0.431394	0.924096	-0.643799	-0.335923	-0.766162	-1.35917	0.577442	0.427873	1.06774	0.290492	0.417358	0.597636
Aradu.G1DZV	-0.407473	0.784714	0.866984	-0.541371	-1.1389	-1.21597	0.390712	0.407326	0.918848	0.114958	0.439727	0.124217
Aradu.G1LZN	0.660661	-0.904069	-1.10376	1.00522	0.708877	-0.238079	0.52569	0.702337	-0.440403	0.579798	-0.859899	-0.662687
Aradu.G1MD8	0.267768	1.57106	0.68391	-0.0680143	-0.331859	-0.838513	-0.764502	0.374462	-0.075975	-0.488846	0.183468	-0.674506
Aradu.G2KK1	0.261037	0.326061	0.107071	0.469965	0.719706	1.56135	-0.925398	-1.15617	-0.826449	-0.624808	-0.111903	0.206815
Aradu.G36MQ	1.02824	-0.515997	-1.04749	0.673531	1.11145	-0.536269	0.0142864	-0.105699	-0.537102	0.0765335	-0.634015	-0.508583
Aradu.G5CNQ	0.0252269	1.41571	-0.327223	0.346674	-0.412917	-1.11945	0.729601	-0.245239	0.384507	0.39876	-0.127489	-0.342848
Aradu.G5XU3	0.817886	-0.522268	-1.28837	0.512414	1.29686	0.365727	0.321404	0.0407995	-0.476058	0.243008	-0.240067	-1.16673
Aradu.G6G7R	0.106052	0.847141	1.40819	0.919177	-0.279538	-0.349949	-0.171244	-1.18546	-0.0530747	-0.487525	-0.336473	-0.051356
Aradu.G6ZA5	-0.359496	1.24975	1.42068	-0.651877	-0.534565	-0.227606	-0.411999	-0.360993	0.292628	-0.520208	0.0765054	0.899236
Aradu.G88TS	-0.922699	0.871298	0.383017	-0.694737	-1.04032	-0.205753	0.564022	-0.157633	0.771491	0.0259083	0.599343	0.520942
Aradu.G8ILU	0.987301	-0.686378	-1.54638	0.957758	1.13418	-0.0379893	-0.135333	0.17785	-0.718929	0.220992	-0.0985353	-0.676718
Aradu.G92J8	-0.275255	-0.559346	-0.577227	0.264131	0.722248	0.338395	0.713618	0.274323	-0.563666	0.276861	-0.416513	-0.565163
Aradu.G93SV	-0.305646	1.29917	1.1639	-0.463045	-0.881656	-0.289151	0.0714221	-0.214814	0.181761	-0.361846	0.0717571	-0.301821
Aradu.G99GB	-0.845959	0.0916764	0.523299	-0.714486	-0.229497	0.533324	-0.365321	-0.637919	0.142388	-0.480296	0.766212	1.17396
Aradu.G9WAR	-0.165046	-0.105076	0.254581	-1.23222	-1.15965	0.0917691	0.49443	-0.498652	0.311564	0.444048	0.695261	0.621216
Aradu.GA8V3	1.21252	-0.360592	-1.30478	1.2847	1.06479	-0.185943	0.263679	0.102431	-0.666545	0.592471	-0.433744	-1.36437
Aradu.GB4U4	-0.415886	0.936693	1.11924	-0.182941	-0.99479	0.011262	0.128843	-1.20107	0.65371	0.085791	0.125726	0.237079
Aradu.GB59Q	-0.588237	1.14141	1.49562	-0.48876	-0.637786	-0.200318	-0.651405	-0.392099	0.707763	-0.774935	-0.14286	0.513831
Aradu.GCV2U	0.735879	-0.42807	-1.63867	0.618428	0.973019	-0.918232	0.00347162	1.49272	0.181242	0.358554	-0.667201	-0.299294
Aradu.GD3QU	1.15503	-0.973219	-1.33537	1.09508	1.0399	-0.045407	0.345832	-0.235428	-1.06085	0.602508	-0.129351	-0.823027
Aradu.GD973	1.19165	-0.978578	-1.19393	1.09692	0.897902	0.126322	0.168183	-0.282073	-0.761418	0.560231	-0.418109	-1.11611
Aradu.GFH4R	-0.243843	-0.318348	0.063287	-0.382233	-0.0919434	-0.677802	0.403276	2.09683	-1.12208	0.439687	-0.0245043	-0.393062
Aradu.GGY80	0.785938	-0.629834	-1.52892	0.595197	0.957594	0.100523	0.572458	0.467882	-0.79168	0.291241	-0.203399	-1.06246
Aradu.GH8LH	0.0413808	-0.0364741	-0.130075	0.496806	0.167348	0.236112	0.791951	-1.07388	-0.527451	0.392721	0.472718	-0.703641
Aradu.GIV5I	0.64044	-1.75705	-0.712972	0.304668	0.566423	-0.765676	0.657114	0.543608	0.205889	0.559685	0.0759697	-0.987768
Aradu.GKD84	-0.59358	1.10619	0.780449	-0.539556	-1.07074	-0.778089	0.225196	0.249663	0.93922	-0.337332	0.198814	0.47864
Aradu.GKH10	0.402533	-0.466375	-1.04992	0.41157	0.456513	-0.327651	0.339678	-0.242189	-0.0803879	-0.784023	1.01917	0.597065
Aradu.GL7L0	-0.549917	1.18714	0.110724	-0.0688996	-1.33638	-0.945984	0.627532	-0.33994	0.906517	0.0532496	0.308893	0.4889
Aradu.GN0L8	0.157398	1.06588	0.914633	-0.12745	-0.333832	-0.0644603	-0.303548	-0.00775092	0.130927	-0.305175	0.187707	-1.26907
Aradu.GN9FN	-0.868432	1.09604	1.68409	-0.633551	-0.609982	0.131042	-0.476363	-0.735954	0.618353	-0.78908	0.0217925	0.499494
Aradu.GP6IB	-0.177454	-0.101872	-0.49194	-0.200145	1.11553	1.1062	-0.792244	-0.831416	-0.657651	-0.356819	0.426965	0.803663
Aradu.GPT8Y	0.14488	0.15019	-0.371774	-0.00795095	0.737174	1.17459	-0.666845	-1.00786	-0.855319	-0.427201	0.394485	1.02133
Aradu.GQ9Z3	0.193506	1.18755	0.981051	-0.886576	-0.431493	-0.890955	0.255342	0.15204	0.500763	-0.576078	-0.0225306	0.0278218
Aradu.GT09D	1.21771	-0.575543	-0.492269	0.948964	0.465551	-0.429729	-0.143379	0.220963	-0.422066	0.106492	-0.541823	-1.01416
Aradu.GT860	0.0487886	0.958928	0.727841	-0.561307	-1.02932	-1.06161	0.0585353	-0.103289	0.699667	-0.17101	0.305999	0.806541
Aradu.GUH8G	0.166392	-0.0358942	-0.141591	-0.0431068	0.462041	0.479831	0.143948	-1.31093	-0.188808	0.147339	0.571437	-0.265306
Aradu.GUU2R	-0.392935	1.364	0.276927	-0.475059	-1.29387	-0.0173959	-0.0303869	-0.207628	0.636205	-0.00382878	0.465065	0.0244481
Aradu.GV26J	-0.570636	0.523894	0.395827	0.119618	-0.64833	-0.440188	0.853521	-0.377257	-0.0605976	-0.461133	0.198086	0.492832
Aradu.GVA21	1.06385	0.219017	-0.894058	1.08787	0.83509	-0.815575	0.277963	0.555618	-0.951194	0.764975	-0.321888	-1.4205
Aradu.GVC6C	1.15434	-0.399727	-0.772927	1.46764	1.06421	-0.611152	-0.217223	0.351368	-0.833326	0.247043	-0.506639	-1.19547
Aradu.GVV0Z	-0.909663	0.97587	0.796176	-0.640055	-1.0605	-0.374566	0.0164539	-0.104721	0.911489	-0.157958	0.384997	0.729579
Aradu.GWA5W	-0.370841	1.24212	1.17879	-0.165312	-0.250881	1.15715	-0.718171	-1.0542	-0.326523	-1.03018	-0.0441993	0.674258
Aradu.GWM5E	-0.858202	1.26197	0.662411	-0.41329	-0.679381	-0.253314	-0.0275321	0.359773	0.767726	-0.213717	0.0923246	-0.178746
Aradu.GY08R	0.195241	1.01202	1.01052	-0.405172	-0.217114	-0.0837332	-0.799273	-0.716729	0.119552	-0.436756	0.160924	0.0653507
Aradu.GY0R3	1.07736	-0.802591	-0.891077	1.41276	1.15741	-0.0389221	0.242704	0.156455	-0.660952	0.242991	-0.707447	-1.02482
Aradu.GZF8P	0.947624	-0.629974	-0.616441	1.15159	0.908912	-0.695741	0.46597	0.775129	-0.432844	0.44724	-0.496118	-0.711342
Aradu.GZK47	0.174541	-0.528399	-1.08393	0.450565	0.552663	0.111493	0.818641	0.670108	-0.354476	0.555064	-0.624094	-0.968461
Aradu.H02UW	-1.22863	0.915967	0.887851	-0.749094	-0.861628	0.871174	-0.368574	-0.401746	0.34677	-0.759098	0.272782	1.11757
Aradu.H0LYU	-0.812048	1.22273	0.637232	-0.949302	-0.904356	-0.276137	0.0243193	0.363782	0.570467	-0.592579	0.338853	0.704894
Aradu.H0TGX	-1.0964	1.45914	0.912533	-0.873771	-1.13962	-0.944864	0.164469	0.116323	0.894331	-0.214143	0.179841	0.711434
Aradu.H0ZGB	0.84691	1.27762	0.145641	0.594744	-0.212503	-1.06583	-0.271188	-0.72683	0.277621	0.135654	0.04469	-0.886931
Aradu.H1LH4	0.333669	0.629415	0.461057	-0.387166	0.493199	0.316103	-0.387166	0.281661	-0.387166	0.0888455	-0.387166	-0.387166
Aradu.H1RN4	0.924368	-0.79865	-1.51576	1.24272	0.769291	-0.424352	0.307036	0.182665	-0.896346	0.74211	-0.286287	-0.857343
Aradu.H306E	0.974056	-0.718158	-1.23173	1.16533	1.03294	0.0807039	0.390017	-0.0644306	-0.679816	0.509752	-0.568043	-0.939795
Aradu.H3B9I	0.295295	-0.0917296	0.700325	-0.041777	-0.0792274	-0.311531	0.585185	-0.988793	-0.777183	-0.041161	0.50933	-0.182233
Aradu.H3F0Z	-0.792246	0.55318	0.945117	-0.661781	-0.635822	0.0309213	0.197929	-0.967842	0.13425	-0.0428538	0.458762	0.293793
Aradu.H447Q	0.491167	-0.169732	-0.0682456	0.59847	-0.528605	-0.188339	0.713779	-1.13587	-0.227755	0.121863	0.1343	0.392645
Aradu.H4FH3	-0.28981	0.807783	0.643273	-0.28981	0.722786	-0.28981	-0.28981	-0.28981	-0.28981	-0.28981	-0.28981	-0.28981
Aradu.H563E	-0.790426	-0.352732	-0.437968	0.672417	-0.790426	-0.167673	-0.232939	0.760516	-0.0237059	0.396275	0.70791	-0.144698
Aradu.H5E9P	-0.0102206	1.15129	0.508572	0.854896	-0.252333	-0.533091	0.466161	-0.565063	-0.23753	-0.0261145	-0.0992479	-0.834247
Aradu.H5GLI	1.0178	0.350979	-0.0432003	0.401255	0.750907	1.3321	-1.01596	-1.49102	-0.97782	-0.293086	-0.128668	-0.18942
Aradu.H5NQ6	0.595424	-0.0872874	-1.356	1.24291	0.96309	0.348104	0.420241	0.422849	-0.629032	0.44316	-0.298696	-0.763847
Aradu.H5REB	-1.53449	1.11662	0.594148	-0.963712	-0.376632	-0.330693	-0.579665	-0.137279	0.995132	-0.131529	0.587231	1.48012
Aradu.H5XDC	-0.687369	1.04368	1.21933	-0.682892	-0.919715	-0.619976	0.423878	-0.23103	0.811573	-0.0312785	0.137349	0.18642
Aradu.H6JMG	0.30414	0.856916	0.579277	-0.511712	-0.290073	0.303936	-1.17419	0.277702	0.39423	-0.805459	0.551372	0.562584
Aradu.H7LWV	0.0183853	-0.574387	-0.574387	0.434784	1.07176	0.363513	-0.45777	-0.188757	-0.574387	0.35908	-0.436245	-0.574387
Aradu.H7PBF	-0.424732	0.822686	-0.252238	-0.433877	-0.545719	0.0673066	0.604267	-0.813232	0.242162	-0.00150101	0.899865	0.665841
Aradu.H82UT	0.0203542	0.883299	1.18114	-0.512042	-0.769739	-0.789144	-0.467619	0.120841	0.701138	-0.193548	0.0269505	0.567423
Aradu.H8WP2	-0.410132	-0.0027472	0.508109	-0.99437	-0.626574	0.462271	-0.375367	-0.500787	1.22353	-0.108976	0.366503	-0.320351
Aradu.H926S	0.0606949	1.23694	0.90908	-0.185847	-0.493506	-0.835625	-0.0191101	-0.412316	0.340816	-0.275649	-0.182113	0.93802
Aradu.H9EEY	-0.636254	1.00047	0.576418	-0.638219	-1.22348	-0.456769	0.395558	-0.313611	0.889757	-0.0839163	0.376797	0.22229
Aradu.H9L9T	0.667275	-0.797997	-1.22078	0.909509	0.886101	0.0931876	0.531808	0.38827	-1.29419	0.688597	-0.520427	-0.809496
Aradu.H9LRG	-0.284444	-0.260518	0.123098	0.168202	-0.478951	-0.00133593	0.946871	-1.28434	0.446849	0.414289	-0.241375	-0.408124
Aradu.H9WXZ	-0.324989	0.78705	0.320856	-0.173714	-0.629051	-0.808486	0.910675	-0.13372	0.580823	0.340084	0.260083	-0.4382
Aradu.HB26F	-0.0867768	0.469933	0.677424	-0.262836	-0.438209	-0.778364	0.549992	-0.225258	0.920643	-0.398695	-0.21145	0.0642862
Aradu.HBT8X	0.58321	0.906291	-0.11738	1.31832	-0.691393	-0.252301	0.412372	-0.831621	-0.481502	1.03894	-0.353707	-0.413744
Aradu.HC4A1	-0.48475	1.35459	0.550573	-0.820322	-0.369414	-0.775158	0.12503	0.00163041	0.368395	-0.24234	0.589846	0.0110397
Aradu.HCL6X	1.36407	-0.11428	-0.907158	0.56487	0.849378	-0.949339	0.123324	0.436053	-0.0481461	0.162215	-0.819319	-0.797654
Aradu.HD6HL	1.07976	-0.476469	-1.44527	1.41196	0.626635	-0.0996255	0.58309	-0.189034	-0.516515	0.870548	-0.241116	-1.09455
Aradu.HE6Y3	1.08095	-0.541824	-1.09671	1.18905	1.00239	-0.115224	-0.0662141	-0.0471332	-0.952462	0.464709	-0.490832	-0.860716
Aradu.HFY72	0.85378	-1.13026	-0.791661	1.05751	0.906143	0.553809	-0.292385	-0.16558	-0.855367	0.192616	-0.462144	0.0428439
Aradu.HGJ4G	-0.178003	1.10897	0.370839	-0.0863755	-0.985155	-0.758633	0.324011	-0.265664	0.606506	0.122884	0.427154	0.702973
Aradu.HGT8J	0.0371838	0.668423	0.352791	-0.00444464	-0.482929	-0.757939	0.455146	-0.0483205	0.46992	0.0754918	0.316871	-0.915156
Aradu.HIJ7L	0.166705	1.02111	1.22027	0.236694	-0.559616	0.199066	-0.969868	-0.667682	0.0486256	-0.684564	-0.113869	0.507375
Aradu.HIY4R	1.08975	-0.797558	-1.57857	1.2645	0.944117	0.206749	0.397128	-0.239263	-0.813067	0.421502	-0.193624	-0.572242
Aradu.HJJ0E	-0.484028	1.455	0.985899	-0.597696	-0.675841	-0.193698	-0.972889	0.0676031	0.537366	-0.884396	0.106716	1.05509
Aradu.HK60X	1.50965	-1.17888	-0.882413	1.0394	0.739058	0.21588	-0.0414841	-0.382547	-0.46189	0.268203	-0.795844	-0.841797
Aradu.HK7DN	1.15691	-0.260732	-0.649486	0.909332	1.15086	-0.438577	0.0929142	0.312042	-0.724166	0.299915	-0.767689	-1.11928
Aradu.HKL6E	-0.42476	1.18836	0.405532	-0.55628	-0.764061	-0.577108	0.28917	0.30263	0.275744	-0.427958	0.385625	0.682475
Aradu.HLL9G	0.360383	1.0742	0.00617597	1.06661	0.116691	0.627114	0.126454	-1.45918	-0.201711	-0.53481	-0.0340142	-0.649958
Aradu.HN90X	1.21995	-0.116981	-0.735702	0.887204	1.17576	-0.608769	-0.0645958	0.909383	-0.728582	0.205139	-0.638432	-1.58701
Aradu.HNH09	-0.34968	1.3378	0.589704	-0.891568	-1.00874	-0.540784	0.797278	0.844363	0.109503	-0.400917	0.162232	0.0199669
Aradu.HP0TL	0.0856284	0.799755	0.0539975	-0.110966	-0.269928	0.772361	-0.452563	-0.995055	-0.37226	-0.557881	0.559183	0.625956
Aradu.HPM23	-0.0211181	1.09543	0.0595481	0.860813	-0.289878	-0.0146009	0.331036	-0.802524	0.0385994	-0.465664	-0.0449363	0.139991
Aradu.HQ2V8	-0.0896657	0.939358	0.332474	-0.54632	-0.300843	0.360268	-0.20997	-0.893304	0.479069	-0.841301	0.684002	0.585597
Aradu.HS2H7	0.741649	-0.170265	-1.18637	0.926841	0.853452	-0.703047	0.0344615	1.07632	-0.676782	0.460994	-0.431183	-0.853192
Aradu.HSB55	0.905648	-0.564217	-1.35244	0.998646	1.25936	0.263404	0.298735	0.175636	-1.04915	0.273089	-0.152825	-1.01799
Aradu.HT46D	0.000208991	0.756932	1.16049	0.357314	-0.27988	0.698722	-0.0111414	-1.41776	-0.669785	-0.656102	-0.315551	0.318617
Aradu.HU29Z	1.70522	-0.891139	-0.519513	0.899188	0.56211	-0.700515	-0.328061	0.246981	-0.718942	0.255767	0.0224964	-0.975208
Aradu.HU4L8	-0.298078	1.49025	0.399153	-0.17577	-0.141505	-0.0461735	0.454723	0.0642892	-0.856708	0.40002	0.115357	-0.948035
Aradu.HU8I6	-0.916284	0.933929	0.525166	-1.18556	-0.681013	0.575243	-0.811881	0.184398	0.980388	-0.997147	0.562174	0.857661
Aradu.HV7VA	-0.555014	0.933155	0.525754	-0.697404	-0.623277	-0.606692	-0.128616	0.100801	0.487772	-0.397413	0.0716568	0.368362
Aradu.HVG4L	0.0457369	0.75684	-0.22099	1.23618	-0.179402	-0.378261	0.461831	-1.16765	0.0515483	0.56958	-0.157987	-0.629553
Aradu.HX0A2	0.425276	1.37055	0.100722	0.538051	-0.398596	-0.749694	-0.218654	0.0957932	0.45966	-0.0229558	-0.0457761	-0.634363
Aradu.HXR78	1.26714	-1.14004	-0.212431	0.217716	0.628698	0.453311	0.976073	0.656876	-0.583217	0.193004	-0.439736	-1.41422
Aradu.HY0D1	-0.286816	0.774344	0.664152	-0.308467	-0.623421	-0.867534	1.06569	-0.0761274	-0.195449	0.314784	0.293659	-0.00718389
Aradu.HZ16A	0.999184	-0.634894	-0.88304	1.5812	0.688117	-0.359788	0.210127	-0.294177	-0.825764	0.669032	-0.552441	-0.847666
Aradu.I022X	-0.745983	0.385675	0.989816	-0.333541	-0.199092	0.0453365	-0.0290975	-0.558391	-0.0921699	-0.111622	0.93986	0.167439
Aradu.I094W	0.31497	-1.22756	-0.817551	0.13959	0.368153	-0.623238	0.820098	0.892161	-0.547872	0.451346	0.132263	-1.09439
Aradu.I0DE3	-0.601801	0.78867	0.588269	0.126575	-0.814044	-0.750377	0.630821	-0.61095	0.329904	0.300211	-0.0458391	-0.203497
Aradu.I0DSK	-0.300972	1.27396	0.938876	0.0598931	-0.396885	-0.665244	-0.285036	-0.428819	0.883023	-0.18879	0.199145	-0.114239
Aradu.I0IYA	-0.282627	-0.0392179	0.107883	-0.579426	0.678463	1.05134	-0.469513	-0.935714	-0.791065	-0.459241	0.40946	1.57466
Aradu.I1CLH	-0.912793	1.60345	0.973926	-0.573031	-0.832636	0.0742988	0.073303	-0.111278	0.694529	-0.41674	-0.0827022	0.910152
Aradu.I1HHU	0.280017	1.11448	0.051114	0.885209	0.0381103	-0.710334	0.300313	-0.491581	-0.134705	-0.329081	-0.129261	-0.122253
Aradu.I27F7	-0.905989	-0.58755	-0.475117	-0.930448	-0.961506	-0.920454	0.660919	0.892529	1.14891	0.687981	1.13481	0.0743024
Aradu.I29MY	0.914776	-0.826747	-0.864564	1.25291	1.11835	-0.0673949	-0.0482739	-0.343263	-0.910216	0.227632	-0.518128	-0.220727
Aradu.I2DKG	-0.647619	0.105884	-0.197746	-0.75674	0.170081	0.345011	0.12734	-1.2028	0.231268	-0.163646	0.870279	1.16188
Aradu.I32LI	-1.11183	-0.408794	-0.610828	-0.741659	-0.380808	-0.337433	-0.0535419	-0.829795	1.25669	0.441493	0.602428	1.6379
Aradu.I3F0I	1.0681	-0.338247	-0.833034	0.814357	0.975284	-0.27816	-0.241539	0.200327	-0.82708	0.286086	-0.438038	-1.00245
Aradu.I3LXE	-0.75525	-0.330359	-0.572764	0.188213	-0.283505	-0.571776	1.19802	-0.87253	-0.0152949	0.856455	0.357395	0.127051
Aradu.I4ITZ	0.850355	-1.02372	-0.826556	1.27412	0.798212	-0.37291	0.651009	-0.37027	-0.714431	0.469375	-0.639929	-0.791064
Aradu.I4VB1	0.481667	1.20423	0.943313	0.426814	-0.540971	-0.619875	0.0290556	-0.414063	0.131497	-0.0244733	0.0343866	-0.690208
Aradu.I50CA	-0.317035	1.47744	1.74955	-0.212432	-0.53512	-0.124655	0.320859	-0.19348	-0.297988	-0.226455	-0.21191	-0.4552
Aradu.I5672	-0.0517715	0.671888	0.00667202	0.241907	-0.416737	-0.587263	0.573964	-0.340088	-0.178116	0.261469	0.588337	-0.277099
Aradu.I59MW	-1.12988	0.569668	0.738119	-0.369816	-1.22484	-0.168446	0.202114	0.270654	0.696721	-0.445635	0.632369	0.843649
Aradu.I6169	0.20678	1.33299	0.611872	0.457641	-0.625004	-0.796211	-0.10247	-0.592246	0.247792	0.0967692	0.174327	-0.430376
Aradu.I67U0	0.951619	-0.76489	-0.61435	2.01595	0.742389	0.0709221	-0.264644	-0.744111	-0.773816	0.294704	-0.570644	-0.364388
Aradu.I6Y0X	-0.209173	1.03553	0.695179	-0.47772	-0.690216	-0.895387	-0.391953	0.348658	0.948519	-0.52666	0.148483	0.00899181
Aradu.I79F7	0.988883	0.286525	-1.11638	0.901345	1.12258	-0.475931	-0.293058	0.466596	-0.463118	0.527586	-0.797838	-0.84204
Aradu.I7M78	0.578694	-0.662695	-1.24392	0.320588	0.730984	-0.686255	0.584675	0.268401	-0.0133038	0.66038	-0.642439	-0.901653
Aradu.I7YBK	-1.62696	0.611584	0.81975	-1.36991	-0.883136	0.211584	0.56561	-0.0752679	0.497476	-0.0191319	0.626691	1.02132
Aradu.I8M07	0.954749	-0.960158	-0.735494	1.00175	0.897583	-0.327974	0.38727	-0.0751793	0.255162	0.373814	-0.631318	-0.618614
Aradu.I8S3P	1.09509	-0.724205	-1.04222	1.20095	1.19708	-0.140206	0.525827	-0.114285	-1.22845	0.558242	-0.685589	-0.961103
Aradu.I94L5	-0.484369	1.09441	1.52808	-0.409673	-0.0920788	0.646364	-0.639102	-1.27584	-0.0275541	-0.647653	0.315302	0.712906
Aradu.I9U5I	1.24756	-0.471383	-1.12161	1.46472	0.839548	-0.679086	0.162372	0.195438	-1.06385	0.515204	-0.376033	-0.728139
Aradu.IA52W	-0.411844	-0.135788	-0.552876	-0.442393	-0.136143	0.570508	0.357335	-1.33297	0.249428	-0.0432174	0.781577	1.3543
Aradu.IA5SB	-0.523198	0.985546	0.702267	0.119646	-0.941349	-0.332015	0.381258	-0.782317	0.591113	-0.176675	0.308169	0.341631
Aradu.IC19J	1.04945	0.023647	-1.05405	1.03799	0.682788	-0.39196	0.35942	0.419246	-0.301514	0.619408	-0.922662	-1.19794
Aradu.IDD64	-0.703915	1.02799	1.27184	-0.842265	-0.806746	-0.161744	-0.198804	-0.253612	0.725295	-0.71701	0.317512	0.853373
Aradu.IE12B	0.600569	-0.948878	-0.75084	0.215628	0.784521	-0.862811	0.64887	0.97433	-0.491034	0.377842	0.0496069	-0.991478
Aradu.IF4E5	-0.397969	1.1738	0.274445	-0.0201721	-0.602307	-0.214936	-0.666269	-0.597318	0.44839	-0.513033	0.325427	0.853541
Aradu.IF5M8	0.412389	1.28135	0.620462	0.292174	-0.0607658	-0.37127	0.0614052	-0.785826	0.349143	-0.737985	-0.0952507	-0.24529
Aradu.IF72W	-0.485649	0.918482	0.829503	-0.250132	0.0193417	1.25831	-0.856299	-0.610236	-0.221116	-1.34136	0.310578	0.710332
Aradu.IFI3Q	1.33027	-0.492445	-0.855409	1.79834	0.511013	-0.24315	0.219886	-0.548027	-0.855409	0.0239655	-0.63345	-0.665962
Aradu.IFZ2Q	0.987841	-0.272838	-1.1755	0.865761	1.10307	-0.720967	0.150512	0.213096	-0.453951	-0.020975	-0.421913	-0.716337
Aradu.IGE5B	1.30229	-0.907272	-1.13071	1.2482	1.09275	-0.303008	0.125198	-0.0659407	-0.948122	0.598875	-0.507197	-0.659033
Aradu.IGS6P	0.0964807	0.274798	0.339943	0.0188583	-0.299297	-0.461397	0.338907	-0.748461	0.261183	0.0376259	0.426148	-0.0930924
Aradu.II4Y3	0.833129	-0.528406	-0.884109	1.19004	0.972212	-0.0553144	-0.0913522	0.337764	-0.632015	0.111015	-0.729604	-1.28415
Aradu.II75M	1.47884	0.306993	-0.151678	1.73238	1.17151	0.546434	-0.833086	-0.851397	-0.869242	-0.718104	-0.907286	-0.78864
Aradu.II7EB	0.589253	-0.277915	-1.29651	0.242941	0.523557	-0.664206	-0.419194	1.62772	-0.194999	0.551311	-0.0659243	-0.430581
Aradu.IIE2D	1.11241	-0.758354	-0.739548	1.16066	0.925382	-0.515147	-0.0173643	0.0794421	-0.653525	0.345265	-0.6091	-1.07199
Aradu.IJ0MB	-0.721491	-0.587834	1.06481	-0.421737	-0.380696	0.618804	-0.635961	-1.00368	-0.0704241	-0.455496	0.79304	0.987005
Aradu.IJU49	0.410496	-0.280779	-1.42014	0.821353	0.718169	-0.405651	1.3573	0.571587	-0.59206	0.961059	-0.566155	-0.879339
Aradu.IL9WG	1.22505	-0.529956	-1.00981	1.65021	0.956703	-0.0990716	0.0424022	-0.369677	-0.785965	0.436552	-0.542359	-1.02475
Aradu.IM8LC	0.0425637	0.648869	0.442369	1.24573	-0.389513	-0.444288	0.63558	-0.978493	-0.168138	0.457906	-0.124115	-0.738267
Aradu.IMB5P	-0.809934	0.70433	0.560523	-0.808188	-0.60958	-0.521407	0.525355	0.00893432	0.464505	-0.0460103	0.581682	0.0564455
Aradu.IMK3L	0.223577	0.239217	0.675895	0.103338	-0.782451	-1.13056	0.215019	0.314609	0.718289	0.248771	0.396469	-0.733852
Aradu.IN2S6	0.268584	1.50782	0.531251	0.377429	-0.341557	-0.292813	0.472528	-0.874159	0.129108	0.209133	-0.055495	-0.521532
Aradu.IQ373	0.202941	-0.232008	-1.25733	0.170375	0.786745	-0.373201	0.672585	0.368309	-0.0855413	0.360534	-0.398942	-0.885931
Aradu.IQS3D	-0.409741	0.947094	0.521685	-0.0446678	-1.08792	-1.08459	0.415418	0.178966	0.607264	0.421143	0.426652	-0.0818467
Aradu.IR41I	-0.739166	0.896535	0.70595	-0.734646	-0.969239	0.0166539	0.336732	-0.452383	0.925035	-0.116739	0.596942	0.784403
Aradu.IS5YT	0.865328	0.0380784	-0.95329	0.725825	1.13967	-0.183261	-0.502451	0.63416	-0.76238	0.0940502	-0.685095	-0.720517
Aradu.ISV8J	1.26402	-0.568171	-1.21823	1.16245	0.96799	-0.368043	0.84255	-0.589007	-1.07528	0.62655	-0.443582	-0.569533
Aradu.ISW95	-0.148795	1.6546	0.950977	-0.238544	-0.736545	-0.796157	0.709675	-0.0167892	0.188881	0.0207101	-0.200549	-0.25091
Aradu.IT4YX	-0.589814	-0.340352	-0.0241904	-0.0614414	0.00602173	0.651213	0.341317	-1.3515	-0.613803	0.0665463	0.684123	0.697313
Aradu.IU0EI	1.14124	-0.125136	-1.13962	1.25055	0.882506	-0.692636	0.591572	0.515586	-0.581523	0.641331	-0.45493	-1.27954
Aradu.IU2DB	0.812412	-0.783337	-0.929017	0.722889	0.855514	-0.269399	0.346056	0.623196	-0.536801	0.260655	-0.272025	-0.811101
Aradu.IU4W9	1.12514	-0.81523	-0.81523	1.63503	0.993403	-0.264575	0.156282	-0.725395	-0.679448	0.653583	-0.687801	-0.72272
Aradu.IV00F	-0.069656	1.60433	0.549423	0.222382	-0.719202	-1.00925	0.0407343	-0.108808	0.398881	-0.371981	0.0245258	0.384524
Aradu.IW3RC	-0.554166	1.30663	1.08138	-0.946542	-0.99742	-0.415088	-0.121904	0.173573	0.714024	-0.313365	0.0927848	0.331727
Aradu.IXS5D	1.35945	-0.987765	-0.812749	0.916103	1.26419	-0.355886	-0.0931812	-0.21533	-0.682689	0.414353	-0.669125	-0.692257
Aradu.IY5GM	0.580646	-0.00475636	-0.419568	1.01838	-0.0995351	-0.971109	0.642085	-1.02708	-0.27883	0.55222	0.405123	-0.577254
Aradu.IY69R	0.725502	-0.151495	-0.34109	1.47171	-0.166274	-0.297408	1.00892	-1.51456	-0.148055	0.751366	-0.056767	-0.639969
Aradu.J06JT	0.9744	-0.685327	-1.0066	1.44274	0.864134	-0.242199	0.249902	-0.3098	-0.798186	0.89312	-0.447522	-1.10128
Aradu.J0PRI	0.995345	-0.253227	-0.825362	0.261778	1.23699	0.0699042	-0.725594	0.585689	-0.634385	-0.34858	-0.413173	-0.866669
Aradu.J1ILD	-0.513391	0.618388	0.177357	-0.294177	-0.972051	-1.07276	0.675492	0.684896	0.46783	0.481027	0.3861	0.11839
Aradu.J1KX5	-1.00552	0.0791662	0.553917	-0.645382	-0.853462	0.97459	-0.379038	-0.92422	0.484929	-0.202656	0.477813	0.649585
Aradu.J1Y0V	1.1556	-0.899691	-0.798096	1.23902	0.704819	-0.62825	-0.16393	0.267151	-0.411847	-0.0791686	-0.931536	-0.29772
Aradu.J20LR	0.254763	0.581214	0.703022	0.737242	0.0672373	-0.722744	0.246566	-0.701555	-0.267669	-0.702955	-0.132215	-0.059603
Aradu.J2EE7	-0.0723507	1.36705	1.30885	-0.358796	-0.214001	0.470967	-0.750472	-0.628792	-0.420965	-0.391145	0.175683	-0.323601
Aradu.J2IBJ	1.71484	-0.519586	-0.550083	1.39514	0.971898	-0.45938	0.329901	-0.533889	-0.455479	0.273311	-0.790845	-0.899133
Aradu.J3SRZ	-0.565222	1.01004	0.525971	-0.440743	-1.07408	-0.618603	0.389108	0.147012	0.270404	-0.344576	0.603702	0.251522
Aradu.J4TNX	0.188578	0.363467	0.406212	-0.514891	0.26032	1.05143	-1.64505	-0.232008	-0.0481871	-0.784819	0.671842	0.873479
Aradu.J5C44	-0.490957	1.43449	1.74209	0.0658559	-0.952262	-0.894531	0.0408804	-0.293299	0.353539	-0.275684	0.0466355	-0.312989
Aradu.J5HIY	0.233557	-0.86282	-0.967452	1.23474	0.401491	-0.213523	0.325961	-0.159761	-0.613458	0.801148	-0.408287	-0.834308
Aradu.J5N9U	-0.593135	0.00188746	0.492269	0.0397348	-0.054465	0.911231	0.172001	-1.12324	-0.776396	0.169346	0.335763	0.422601
Aradu.J67TY	0.419606	-0.0686929	0.0425803	0.447622	0.314395	0.851308	-0.325589	-1.54752	-0.753127	-0.224001	-0.199892	0.841714
Aradu.J79WY	0.993873	-0.00672285	-0.8615	1.21434	0.948343	-0.448792	0.120904	0.427998	-0.461401	0.287495	-0.692065	-1.36293
Aradu.J7LHV	-0.72224	0.205585	0.482977	-0.605638	0.0373235	0.83118	-0.29526	-1.75828	-0.251847	-0.329654	0.872454	1.32121
Aradu.J822K	-0.704375	0.674857	0.0460707	-0.903337	-1.18164	-1.03076	0.645053	0.276818	0.780765	0.381111	0.553917	0.17945
Aradu.J8CE9	0.703005	-0.507691	-0.494348	0.367183	-0.0919576	0.177831	0.938527	0.482719	-0.00815115	0.550361	-0.745303	-0.837173
Aradu.J8CFX	-0.203234	0.993923	0.583902	0.253398	-0.901073	-0.686222	0.12477	-0.242446	0.449013	0.0220221	0.453531	-0.211884
Aradu.J8NWR	-0.545711	0.497099	0.593228	-0.3082	-0.612941	-0.042796	0.5346	-0.600875	0.0826013	0.150073	0.683313	-0.213912
Aradu.J94LY	0	0	0	0	0	0	0	0	0	0	0	0
Aradu.J9GQP	-0.963888	0.738802	0.0683563	-1.28426	-1.04866	-0.804968	0.232072	1.20154	0.943171	0.20996	0.572166	0.650488
Aradu.JA4E1	0.779559	-0.649258	-0.846705	1.27705	0.887655	-0.223377	0.751583	-0.591121	-0.951779	0.676183	-0.604849	-1.00541
Aradu.JAX7N	-0.525706	0.997136	-0.600108	-1.03868	-0.670854	-1.0483	0.571512	0.246209	1.36182	0.20384	0.33144	0.162841
Aradu.JB051	0.817273	0.614445	0.0226782	0.591701	0.290741	0.855938	-0.42584	-1.133	-0.783617	-0.123106	-0.0628819	0.302358
Aradu.JB556	0.867264	-0.968192	-1.37723	0.755154	1.06736	-0.724878	0.859007	0.295931	-0.578116	-0.198793	-0.326011	-0.361874
Aradu.JBV2R	-1.01343	0.569827	0.397898	-0.793619	-0.961005	0.189404	0.0650833	-0.569882	0.440108	-0.356965	0.737616	1.06385
Aradu.JDP66	1.42288	-0.83117	-1.13201	1.25471	0.576399	0.1125	0.176473	0.283526	-0.912558	0.626665	-0.581332	-0.783964
Aradu.JEC4J	0.411156	1.6055	1.7123	0.277259	-0.092648	-0.0794369	-0.718931	-0.117196	0.0732911	-0.913184	-0.374083	-1.09546
Aradu.JH3GC	0.445643	-0.0747372	-0.542433	0.132865	1.57929	0.858231	-0.862675	-0.821965	-0.849304	-0.5815	0.140485	0.44897
Aradu.JJ2FT	0.589265	0.00122365	-0.417844	0.455243	-0.202348	-0.392115	0.241268	-0.918997	0.0631991	0.378627	0.32287	-0.0204269
Aradu.JKK2A	0.165361	1.25691	0.714316	-0.205676	-0.478872	-0.413011	-0.81552	0.0588974	0.402111	-0.655257	0.29962	0.295189
Aradu.JL6EF	-1.03297	0.801822	0.984633	-0.73925	-1.22708	-0.527228	0.363355	-0.150414	0.899968	0.201672	0.175519	0.90221
Aradu.JM1K2	1.04623	-0.939343	-1.22536	1.11668	0.908331	0.113873	0.0899869	-0.235431	-0.856081	0.53323	-0.464985	-0.851734
Aradu.JM2ND	0.121417	1.15547	0.381659	0.580224	-0.574027	-1.56233	-0.0784764	-0.0945577	0.466766	0.119807	-0.137698	-0.418649
Aradu.JM51G	0.0834927	0.335674	0.0116322	0.427111	-0.670887	-0.547273	0.864599	-0.292862	0.301342	0.406694	0.423707	-0.465044
Aradu.JMB87	0.765223	0.807118	-0.0145162	0.116473	-0.00646011	-0.206062	0.354022	-0.885235	-0.18631	0.261745	0.354143	-0.470085
Aradu.JMD12	-0.0195912	-0.551038	-0.309219	0.326445	1.1639	0.869142	0.212542	0.372777	-0.904348	0.0519468	-0.438588	-0.487608
Aradu.JMZ0B	0.631926	-1.4834	-1.43539	0.496788	0.350659	-0.299915	0.372662	0.202734	-0.447251	0.977499	0.328186	-0.0911115
Aradu.JN299	0.129008	0.665757	0.924672	0.410086	-0.108041	0.0882204	0.47149	-1.11371	-0.0240947	-0.381563	-0.141066	-0.395993
Aradu.JN9TL	-0.162009	0.970719	0.910002	-0.403568	-0.795053	-0.204588	-0.145368	-0.627703	0.598292	-0.476016	0.198437	0.552894
Aradu.JQ0J4	0.241519	-0.0585029	-0.435138	-0.148213	0.875664	1.37917	-0.725201	-1.27514	-0.635379	-0.19844	0.581563	0.723382
Aradu.JR4KW	0.467166	-1.12072	-0.997759	1.20211	0.630421	-0.405715	1.25672	-0.534652	-0.701905	1.15491	-0.412592	-0.755594
Aradu.JR9SL	1.27812	0.159595	-0.749818	1.41115	1.19084	0.129634	-0.170696	-0.358015	-0.93668	0.352311	-0.938526	-1.09955
Aradu.JT1K4	1.07744	-0.815955	-1.09518	1.20876	0.897925	-0.44969	0.356042	0.405578	-0.86249	0.591462	-0.541549	-1.11771
Aradu.JT5HU	0.096005	1.54802	0.384326	-0.231406	-1.04204	-0.783199	0.640583	0.189273	0.172679	0.0581646	-0.0515055	0.341457
Aradu.JT88V	-0.517471	-0.14283	-0.295492	-0.468688	-0.227666	0.195683	0.874573	-1.03944	-0.329557	-0.0949382	0.616697	1.10343
Aradu.JU9J9	1.15347	-0.133914	-0.952008	1.33613	0.948827	-0.357044	0.414955	0.44601	-0.956514	0.631834	-0.679484	-1.27021
Aradu.JV441	-0.227797	1.4907	0.995468	-1.31246	-0.288217	-0.68734	-0.0976568	0.309885	0.187944	0.010049	0.450151	-0.159628
Aradu.JWG0R	1.34609	0.0457499	-0.822991	0.951516	1.01981	-0.546839	-0.185671	0.635132	-0.657907	-0.144555	-0.864951	-1.04705
Aradu.JWM4N	-0.95468	1.49172	0.910465	-0.782966	-1.0552	0.0358421	0.245948	-0.607704	0.46672	-0.157707	0.302411	0.953002
Aradu.JX29L	1.13008	-0.570834	-0.405517	0.880192	1.15455	-0.0560929	0.0279169	-0.100922	-0.779294	0.00109605	-0.756769	-0.442091
Aradu.JYH5U	0.469899	-0.72662	-0.750965	0.299911	0.768642	0.0838178	-0.373081	-0.0743334	-0.763326	0.539373	-0.529393	-0.542465
Aradu.JZ8MY	-0.00630986	-0.840784	-0.652837	-0.0642404	-0.0518955	1.0568	-0.24594	0.228007	-0.50943	-0.121569	-0.359947	0.373354
Aradu.K07Y8	0.929283	-1.05638	-1.18725	0.970401	1.15645	-0.158251	0.538506	0.0617663	-0.966373	0.487883	-0.305598	-0.872266
Aradu.K0ADV	-0.619218	1.03027	0.19406	-0.445514	-0.869475	-1.13503	1.06257	0.100135	0.699257	0.35075	0.251479	0.55706
Aradu.K0UTK	-0.892163	1.05674	0.693407	-1.01027	-0.748975	-0.4968	-0.000921919	0.647986	0.833706	-0.385528	0.0278124	0.626398
Aradu.K1YST	-0.170091	1.45332	1.29729	0.529786	-0.180526	-0.578031	-0.495178	-0.400845	-0.150074	-0.361607	-0.205411	-0.487766
Aradu.K23U3	-0.503115	1.01036	0.694426	0.149202	-0.433654	0.330683	-0.119771	-1.51957	-0.627444	-0.0253758	0.621163	1.03408
Aradu.K2F98	0.150935	-0.559804	-0.663789	0.557735	1.10199	-0.0230144	0.679041	-0.236288	-0.55029	0.657555	-0.58329	-0.609023
Aradu.K2GBA	-1.05134	0.639216	0.153465	-0.518001	-0.189823	0.831891	0.124028	-0.619258	-0.287051	-0.41719	0.914092	0.479029
Aradu.K2J5H	1.04659	-0.67245	-1.45325	0.948176	0.542355	-0.674892	0.826448	0.248425	-0.295623	1.08153	-0.112668	-0.927534
Aradu.K2UAZ	1.03912	-0.811035	-1.05866	0.874946	1.01489	-1.16862	0.639498	0.676444	-1.00114	0.761858	-0.245466	-0.895811
Aradu.K39P9	0.184564	-0.622925	-0.657685	0.694738	1.51171	0.507612	-0.479984	0.00439166	-0.304759	0.239162	-0.524099	-0.616656
Aradu.K3GZ3	0.575973	1.33205	0.226211	0.975314	-0.250473	-0.409469	-0.504126	-0.236499	0.174748	-0.254078	-0.206104	0.244625
Aradu.K3K6M	-0.581469	1.19701	1.02858	-0.416839	-0.874975	-0.10566	-0.0174404	0.0566224	0.144782	-0.336807	0.0163551	-0.045865
Aradu.K3KYD	-1.11163	-1.31024	-1.05148	-0.66372	-0.624042	-0.948386	0.859868	1.42923	0.790035	0.743458	0.704172	0.715719
Aradu.K3NKF	-0.489603	1.51674	0.684567	-0.123654	-0.902597	-0.39194	0.52218	0.0860345	0.21514	-0.247307	-0.040183	0.0568027
Aradu.K41I0	-0.454538	-0.118217	0.395558	0.139102	-0.689088	0.419406	0.901663	-1.27818	-0.0946148	0.50188	0.295869	0.481874
Aradu.K44IT	0.974634	-0.700987	-1.08702	-0.0147735	0.617604	-0.307	-0.160367	1.60247	-0.728155	0.288413	0.0319594	-0.597404
Aradu.K4LU2	-0.864232	0.985899	0.814722	-1.03134	-1.03359	-0.453033	0.652571	0.281654	0.975783	0.0256205	0.213783	0.525397
Aradu.K52XK	1.28745	-0.860194	-1.04705	1.53626	0.557699	-0.248068	0.288011	-0.0942317	-0.912118	0.587021	-0.499564	-1.00093
Aradu.K5HNP	1.08503	-0.448335	-1.30214	1.28443	1.00013	-0.502137	0.128195	0.119654	-0.664932	0.731089	-0.351409	-0.965378
Aradu.K5HUU	0.907091	-0.398161	-1.3244	0.330463	1.01104	0.107865	-0.0684081	0.81431	-0.405158	0.113787	-0.246565	-0.93081
Aradu.K65XZ	0.355462	-0.744339	-0.773503	1.02931	0.799768	-0.42513	0.904093	-0.54364	-0.983813	0.914716	-0.444547	-0.658015
Aradu.K6KQ4	-0.343303	1.13773	0.25123	-0.675863	-0.698027	-0.969487	0.634812	0.162156	0.868908	-0.0551672	0.0759522	-0.0619118
Aradu.K70HA	1.4568	-0.564525	-0.485122	1.22532	1.05222	-0.634662	-0.175983	0.141553	-0.801809	0.474488	-0.589455	-0.821157
Aradu.K75LB	0.5901	0.160306	-1.09008	1.0298	1.01586	-0.500379	-0.109057	0.693921	-0.379169	0.0155841	-0.68643	-0.986525
Aradu.K7CLQ	-0.26581	0.58806	0.203912	-0.357814	-0.217536	-0.218911	0.484217	-0.571634	1.05674	-0.571634	-0.100853	0.155755
Aradu.K7LHY	-0.219473	1.15146	-0.0372542	-0.632082	-0.468433	-0.258001	0.446798	-0.641289	0.595558	-0.395853	0.222995	0.474263
Aradu.K7MDC	-0.544481	0.713278	1.22682	-0.41127	-0.60716	-0.0960279	0.754541	-1.17139	0.155906	-0.396309	0.223203	0.710438
Aradu.K80ZI	0.146234	0.467627	-0.506157	0.591705	-0.0638445	-0.452961	0.429468	-0.507668	-0.430283	0.25757	0.395893	0.539201
Aradu.K8VCN	0.343277	1.60874	0.634785	0.0683586	-0.312301	-0.579516	-0.283101	0.245918	0.134202	-0.205795	0.00489815	-0.546835
Aradu.K9162	0.473203	-0.963617	-0.52086	0.960375	1.47746	-0.768574	-0.0971032	0.407114	-0.691767	-0.398681	-0.169101	-0.51056
Aradu.KA07S	0.794304	-0.786413	-1.00647	0.945924	1.10096	-0.324796	-0.0501057	0.0307801	-0.533214	0.551936	-0.750227	-0.66937
Aradu.KA0CG	0.888146	-1.28886	-1.33136	0.852063	0.974733	-0.187607	0.466696	0.276995	-0.346122	0.789246	-0.189333	-0.645585
Aradu.KAQ16	-0.655417	1.17687	1.65616	-0.389178	-0.654512	0.221246	-0.395956	-0.400617	0.506981	-0.666199	-0.0318605	-0.0572016
Aradu.KAS7C	-0.481837	1.14488	0.664821	-0.924456	-0.402604	0.326502	-0.599065	-0.251931	0.368594	-0.494844	0.711198	0.329361
Aradu.KB1DP	0.913862	-0.420638	-0.355108	0.639816	0.485333	-0.372581	0.750077	0.999366	-0.557038	0.65374	-0.778577	-0.986553
Aradu.KGA7A	-0.711144	0.356931	-0.610558	0.672045	-0.936709	0.068351	0.716313	-0.569291	0.217608	-0.267337	0.332269	0.438985
Aradu.KGT1D	-0.170692	1.00307	1.11831	-0.268406	-1.07425	-0.885217	0.154175	-0.107279	0.552639	-0.149202	0.15337	0.699509
Aradu.KHF1G	-0.075541	0.842571	0.692471	-0.401476	-0.293078	-0.867761	1.07018	-0.426027	0.134657	-0.155854	0.361203	-0.413842
Aradu.KHJ4B	1.05692	-0.608033	-0.416169	0.0800427	0.950562	-0.245756	-0.464857	0.817903	-1.06474	0.022269	-0.15789	-0.905166
Aradu.KI9GC	0.867139	-1.25768	-0.921098	0.188106	0.749829	0.719852	0.143504	0.657998	-0.786896	0.491322	-0.274356	-0.522731
Aradu.KK9GE	1.02061	-0.755013	-1.25435	1.47995	0.9282	-0.616693	0.0284859	-0.344833	-0.62763	0.56848	-0.331626	-0.317888
Aradu.KL6GI	-0.23351	1.03241	0.469119	-0.521834	-0.82837	0.245781	0.0435747	-0.759438	0.129886	-0.0082568	0.0857125	-0.107164
Aradu.KLJ74	0.819957	-0.67156	-1.58324	0.250069	0.950562	-0.0556946	0.760166	0.571008	-0.484749	0.845464	-0.0719322	-1.42059
Aradu.KNV7E	-0.748473	0.381257	0.767309	-0.440374	0.20275	1.3767	-0.953501	-1.09992	-0.079712	-1.13173	0.610185	0.767189
Aradu.KPI4B	-0.0373673	-0.513295	0.215801	0.30312	0.684532	-0.529666	0.633503	0.0611012	-1.03335	0.00119742	-0.247486	-0.381239
Aradu.KQC8C	0.173905	1.1071	0.298339	0.0418228	-0.545936	-0.100626	-0.751181	0.00798043	0.368656	0.141514	-0.614131	-0.146151
Aradu.KQX01	0.775082	-0.372501	-1.11928	0.969482	0.974112	-0.49162	-0.330288	0.564547	-0.291353	0.29721	-0.667588	-0.640086
Aradu.KR8L4	-0.303424	0.289835	0.226466	-0.0123075	-0.211686	0.597698	-0.330039	-1.72681	0.156901	-0.345611	0.579626	0.899229
Aradu.KRZ23	0.480408	-1.2517	-1.48352	0.541054	0.900257	-0.211222	0.404523	0.425281	-0.520157	0.624471	0.0543295	-0.442851
Aradu.KS3VF	-0.612644	0.632787	0.444956	-0.234397	-0.845341	-0.557913	0.233177	-0.136126	0.386486	0.229468	0.669924	-0.0598603
Aradu.KU7EH	-0.758991	1.21731	0.717893	-0.758701	-0.980554	-0.287223	0.180788	0.368991	0.850841	0.00426564	0.0275862	-0.275888
Aradu.KUT09	-0.891824	1.54152	0.784031	-0.782005	-0.918527	-0.642235	0.299824	0.113147	0.711818	0.000270223	-0.107392	0.621094
Aradu.KV3KX	0.160907	-0.538735	-0.752356	0.534324	0.569539	-0.0840314	0.462027	0.708686	-0.378774	0.624179	-0.658028	-0.939218
Aradu.KVX0Z	1.13802	-0.0888354	-1.06838	0.763466	0.962195	-0.752605	0.500696	0.777801	-0.380793	0.498928	-0.828196	-1.09475
Aradu.KWF52	1.41678	-0.625223	-0.989304	1.58368	1.11851	-0.0652789	0.0225724	-0.581614	-0.871622	0.414882	-0.579108	-0.875746
Aradu.KWL81	-0.0523559	1.28193	0.14085	0.0144329	-0.972601	-0.867723	0.702598	-0.0535642	0.350217	-0.181731	0.324784	-0.0318576
Aradu.KWP32	1.17969	-0.918747	-1.33083	1.30669	1.00816	-0.113429	0.272731	-0.304967	-0.676517	0.611326	-0.380216	-0.888752
Aradu.KX2DS	0.122732	1.72169	1.00474	0.242279	-0.457439	-0.613219	0.369623	-0.759399	0.0335685	-0.392569	-0.0567702	0.13647
Aradu.KXB99	1.4914	-0.186411	-0.825424	1.4541	1.24517	-0.626447	0.0792284	0.0606736	-0.745563	0.374338	-0.669868	-0.752982
Aradu.KXM8K	-0.640883	1.00686	0.553179	-0.519993	-1.46789	-0.545782	0.42498	0.0299714	0.463237	-0.142462	0.1023	0.881705
Aradu.KXZ9V	-0.349992	0.619715	0.871226	-0.352029	-1.14786	-0.674168	0.318753	0.124102	0.659793	0.0968079	0.287627	0.159888
Aradu.KY0UG	0.0270125	1.20042	0.314844	0.187329	0.15068	0.677717	-0.575042	-0.488491	-0.483154	-0.563973	0.430397	0.437872
Aradu.KY78Q	-0.412184	1.50011	0.00136058	-0.579514	-0.406051	-0.306291	-0.61145	0.469071	1.00697	-0.67102	0.679406	0.864477
Aradu.KYQ8M	1.99823	-1.04825	-0.760758	1.02893	0.754449	-0.253627	0.174674	-0.817762	-0.466273	0.33267	-0.73356	-0.819993
Aradu.KZ2JX	0.255504	0.34401	0.790641	0.0320553	0.00698255	0.471104	0.0970149	-1.39207	-0.184901	-0.329165	0.444569	-0.806949
Aradu.KZ80F	-0.394814	1.44837	0.972849	-0.176429	-0.486956	-0.376087	-0.109091	-0.492967	0.259245	-0.462188	0.0133607	0.481174
Aradu.L0WRR	-0.314621	1.25211	0.730865	-0.370817	-0.965582	-1.20296	0.332221	0.409891	0.545075	0.241257	0.252247	-0.0919504
Aradu.L0ZIY	-0.873292	-0.424844	-0.183439	-0.829526	-1.17181	-1.25759	0.689916	0.736162	1.09801	0.750089	0.979104	0.612289
Aradu.L13D3	-0.260915	1.04923	1.35841	-0.780247	-0.552657	-0.0599112	-0.531899	-0.584408	0.339021	-0.544248	0.121007	0.282361
Aradu.L18YW	-1.0443	0.417721	0.551791	-0.536753	-0.214869	0.600812	-0.195906	-1.30432	0.228116	-0.0829148	0.750252	1.01832
Aradu.L1FUQ	-0.247237	1.11949	0.844956	-0.114299	-1.24635	-0.725099	0.505946	0.184264	0.839733	-0.237559	0.0903314	0.126415
Aradu.L20DB	-1.16165	0.795036	0.641273	-1.16409	-1.03208	-1.07712	0.492452	0.992304	0.857573	0.315484	0.531476	0.350542
Aradu.L258T	-0.873861	1.24895	0.671433	-1.00313	-0.910362	-0.33912	0.413478	-0.419952	0.893052	-0.109675	0.480694	0.57939
Aradu.L2FHA	-0.910488	0.94803	1.07083	-0.579626	-1.19346	0.420895	-0.258513	-0.962594	0.413803	-0.020455	0.761121	0.547445
Aradu.L2IAX	1.12635	-0.929382	-1.50507	0.882323	0.878105	0.0586128	0.334795	-0.0470974	-0.709711	0.7645	-0.23617	-0.748716
Aradu.L3GIE	-0.155441	1.19819	0.932052	-0.00966757	-0.074904	-0.437666	-0.579919	-0.325697	-0.235382	-0.512477	-0.137007	0.444734
Aradu.L3I19	1.45318	0.0374722	-0.746813	1.17143	1.66755	0.224997	-0.345673	-0.593404	-0.92849	-0.477112	-1.02146	-0.741612
Aradu.L3Q6E	-0.233407	1.3557	0.238313	-0.13199	-0.790901	-0.483417	0.197401	0.519209	0.506841	0.0470014	0.178864	0.108383
Aradu.L49GZ	-0.818361	-0.608435	-1.03722	-0.99316	-0.825187	-0.546067	1.47145	0.149108	0.828123	0.781002	1.23239	0.452267
Aradu.L4H61	-0.0987049	-0.527852	-1.08528	0.335906	0.418493	-0.306709	0.934225	0.195633	-0.191193	0.0512826	-0.468999	-0.34116
Aradu.L4TVG	-0.737779	0.00239837	-0.484242	-0.306135	-0.608705	0.178827	0.462165	-0.612648	-0.0976143	0.0705352	0.381524	0.220026
Aradu.L5IHI	0.146724	0.097862	-0.379188	0.0181737	0.957879	1.24102	-0.65738	-1.13031	-0.922263	-0.588645	0.325761	0.678659
Aradu.L65IQ	0.741115	-0.69559	-0.69559	1.41781	0.896719	-0.186047	0.114139	-0.355053	-0.615389	0.933182	-0.641604	-0.638041
Aradu.L6FF7	1.29454	-0.351741	-0.61595	0.776496	0.80955	-0.807195	-0.110614	0.760195	-0.327399	0.290784	-0.425402	-0.830209
Aradu.L7ESN	-0.170179	-0.827857	-0.76746	-0.00673606	0.531418	0.138828	0.6497	-0.0912164	-0.370802	0.0825702	-0.0873272	0.0628597
Aradu.L7ZR8	0.767677	-0.550366	-0.712856	1.29851	1.27258	-0.283094	0.290322	-0.716816	-0.726623	0.585326	-0.852062	-0.834905
Aradu.L8SVN	-0.883356	0.48015	1.19124	-0.823127	-0.910484	-0.434435	-0.137986	0.403797	0.459689	-0.0964638	0.591178	-0.0396201
Aradu.L9AJZ	1.48029	-0.146534	-0.927909	1.38604	0.773945	-0.56084	0.321977	0.106251	-0.587557	0.565343	-0.583711	-1.33739
Aradu.L9MCU	-0.36868	1.29254	1.01991	0.0928526	-0.420212	-0.703177	-0.307781	-0.0804174	0.859919	-0.577927	-0.0770546	0.00624643
Aradu.L9VT7	1.14574	-0.854502	-0.613978	1.13897	0.592958	-0.2108	0.443602	-0.0737124	-0.719996	0.873486	-0.670162	-0.807809
Aradu.LAA6N	0.703306	-0.422156	-0.909974	1.07878	0.344194	-0.933965	0.409196	0.760171	0.19178	0.944835	-0.508628	-1.10868
Aradu.LB6JY	0.987035	-1.05097	-1.13759	1.12537	1.09333	-0.521396	-0.160054	0.62318	-0.963314	0.614947	-0.48601	-0.728724
Aradu.LBI05	1.22468	-0.615038	-0.710992	1.29091	0.982912	-0.179445	-0.196056	0.560433	-0.900245	0.367763	-0.256687	-1.62023
Aradu.LBL22	-0.450864	0.265301	0.233245	0.0466809	0.515112	1.09062	-0.822558	-1.13288	-0.829515	-0.523359	0.25644	1.2717
Aradu.LBT1F	-0.63197	1.05205	1.00466	-0.605292	-0.443215	-0.423357	-0.794932	-0.18894	0.727103	-0.482448	0.324487	0.513162
Aradu.LCE5M	0.77639	-0.665765	-0.871243	0.564294	1.48302	-0.455199	0.146409	0.0372541	-0.577012	0.205941	-0.129476	-0.214035
Aradu.LD3HZ	-0.7385	0.321117	0.0316034	0.0822212	-0.99502	-0.283376	0.560334	-0.351073	0.528122	-0.02546	0.55738	0.325694
Aradu.LDI0R	-0.214497	1.25801	0.670811	-0.103302	-0.669078	-0.778573	0.534651	0.355995	0.64314	-0.400097	-0.00816387	-0.385871
Aradu.LF4SZ	1.06973	-0.376113	-1.20371	0.7743	1.10752	-0.53014	0.686089	0.0806455	-1.18912	0.561557	-0.489125	-0.646046
Aradu.LFN02	1.16634	-0.443978	-1.37274	0.664365	1.16361	-0.0563628	-0.219704	0.108313	-0.849496	0.354653	-0.258869	-0.849484
Aradu.LG8KB	-0.55217	0.87323	0.888889	-0.158196	-0.612967	-0.045799	0.354965	0.131107	0.656905	-0.0708707	-0.249547	-0.224578
Aradu.LH11G	0.976839	-1.07956	-1.08244	0.47058	1.18678	-0.424141	-0.0328479	0.712481	-0.972434	0.246753	-0.0683477	-0.875244
Aradu.LH1JG	-1.00842	0.912194	0.961282	-0.833552	-0.0360335	1.08886	-0.641749	-0.552114	-0.29969	-0.958551	0.485011	1.32138
Aradu.LI8IU	-0.460477	-0.00481434	0.747948	-0.634188	-0.851117	0.520465	0.231028	-0.460371	0.87058	-0.578891	0.424274	-0.643051
Aradu.LJ9A5	0.739564	0.955296	-0.161192	0.457714	-0.534865	-0.361112	-0.161967	-0.205865	0.0812827	-0.377951	0.14008	0.0394909
Aradu.LJC5T	-0.621212	0.320935	0.375504	-0.684071	-0.750031	-0.780393	0.927721	-0.413474	0.417296	1.20973	0.566262	-0.645854
Aradu.LN5YX	1.01167	-0.195834	-0.798332	1.5273	0.807796	-0.405512	0.776189	-0.135524	-1.11102	0.666022	-0.842455	-1.21758
Aradu.LNE7D	1.15953	-1.27925	-0.724752	0.709395	0.43405	-0.775256	0.654475	0.893428	-0.188769	0.226678	0.0340831	-0.981584
Aradu.LNK8S	-0.570767	0.352016	0.0584359	-0.310408	-0.212204	0.837939	0.181549	-0.946318	-0.466916	-0.309584	0.346205	1.21068
Aradu.LP0UW	-0.355263	0.696979	0.970603	-0.658751	-0.714052	-1.2895	0.683075	-0.632109	0.476284	-0.229701	0.775943	0.469882
Aradu.LP9ZI	1.12614	-0.210123	-1.1163	1.03739	0.952793	-0.253437	-0.223354	0.572379	-0.891189	0.456172	-0.40396	-1.22985
Aradu.LPP00	-0.373622	1.32765	0.290934	-0.46899	-0.601399	-0.064209	-0.174827	-0.036679	0.498988	-0.879677	0.606075	0.0434444
Aradu.LQ6UQ	1.26203	-0.80563	-0.667811	1.54237	1.22108	0.108965	-0.180979	-0.756543	-0.746324	-0.166364	-0.663417	-0.758001
Aradu.LR698	1.02177	-0.507997	0.156472	-0.507997	0.401263	0.919682	-0.507997	-0.0425245	0.164812	0.264268	-0.507997	-0.507997
Aradu.LRS1M	0.341438	1.20203	0.691306	-0.00892458	-0.401711	-0.850914	-0.655756	-0.409087	0.137136	-0.0809699	-0.0168446	-0.608689
Aradu.LS14T	-4.65276e-05	0.422369	0.542067	0.0790935	-0.718889	-1.15657	0.124802	-0.179487	0.939236	0.459006	0.496017	-0.681973
Aradu.LUI60	0.0293878	1.18029	-0.00985185	-0.429612	0.289821	0.514563	-0.264555	-0.652424	0.251952	-0.376978	0.140543	0.994343
Aradu.LV4I2	0.526675	0.241433	-1.30051	-0.00616963	-0.0711145	0.0618414	0.836784	-0.926493	-0.123792	0.668368	0.734039	-0.363382
Aradu.LV8M3	0.965712	-0.437914	0.00840149	1.36156	-0.463504	-0.245601	0.0645801	-1.41919	-0.00224913	0.221837	0.170035	-0.480988
Aradu.LVF07	-0.128817	0.90842	0.560362	0.228546	-0.564483	-1.31264	0.625769	0.126861	0.586501	0.0907881	0.00820828	-0.373825
Aradu.LYQ47	1.59954	-0.331805	-0.386282	1.73241	0.545347	-0.409884	-0.172277	-0.169871	-0.439905	0.189461	-0.89661	-0.835841
Aradu.LYR4P	-0.845553	1.47293	1.68604	-0.600358	-0.680305	-0.0383355	0.0928554	-0.232185	0.088422	-0.543713	-0.00201967	0.0939814
Aradu.LZ2RQ	-1.02852	0.600907	1.46524	-0.82103	-0.417441	0.404332	-0.515954	-0.808009	0.358316	-0.735521	0.450535	0.854122
Aradu.M0WLK	-1.49439	0.7527	0.52593	-0.836052	-0.752218	0.77819	0.151685	-0.465712	0.451311	-0.14109	0.591954	1.04628
Aradu.M0YPN	0.744974	-1.29459	-0.20778	1.12442	0.61779	-0.326229	0.912859	-0.513531	-0.328029	0.490899	-0.561362	-0.915075
Aradu.M11AR	-0.34627	1.13257	0.959132	-0.132129	-0.758313	-0.956495	0.280934	-0.576492	0.943355	0.0101835	0.100832	0.593892
Aradu.M1AX1	-0.528762	0.651255	0.121165	0.105867	0.178202	0.588693	-0.190898	-1.02993	-0.88881	-0.436496	0.360831	0.739315
Aradu.M1GZN	1.14311	-0.239724	-1.04854	0.396136	0.850333	-0.113952	-0.329654	-0.516039	-0.554293	0.209656	-0.195822	-0.581914
Aradu.M1SM6	-0.231049	-0.350743	-0.208313	-0.294263	-0.323237	0.774003	0.435674	-1.05642	0.0982704	-0.266059	0.839553	0.0338446
Aradu.M1UTK	-0.677452	1.61159	1.09191	-0.567417	-1.01838	-0.604152	-0.165584	0.25428	0.564836	-0.0395882	0.430821	-0.400664
Aradu.M20VL	0.271793	2.15277	1.52402	0.116343	-0.00542395	-0.151555	-0.339849	-0.806654	-0.480291	-0.29244	-0.486056	-0.643622
Aradu.M2JBM	1.06186	-0.218612	-0.991508	1.2464	0.890584	-0.662939	-0.00900886	0.25139	-0.641125	0.544263	-0.549196	-0.921248
Aradu.M2MY1	-0.201005	1.17912	0.976213	-0.309809	-1.00008	-0.941202	0.26697	-0.189401	0.878497	0.0934015	0.0452885	0.355376
Aradu.M3YSI	1.11621	-0.34261	-1.11352	0.764029	1.02114	-0.250358	-0.209212	0.674043	-0.86027	0.174492	-0.39204	-0.766229
Aradu.M4BPS	0.435643	-0.379758	-1.13456	0.423004	0.565365	-0.200937	0.602108	1.34844	-0.685485	0.483015	-0.187352	-0.442556
Aradu.M4EHD	-0.74069	0.172107	0.105032	-0.889424	0.341571	1.09032	-0.779645	-0.701769	0.0876041	-0.677288	0.86767	1.06168
Aradu.M5AZ6	0.769752	0.0219193	-0.98689	0.825805	0.749223	-0.906414	0.721941	0.741354	-1.25857	0.704126	0.0640764	-1.13221
Aradu.M5I54	0.801997	-1.0454	-1.19688	2.02563	0.44285	-0.0918745	0.377076	-0.450201	-0.61998	0.756127	-0.515151	-0.382291
Aradu.M69JC	0.125783	-1.04354	-0.963388	0.671502	0.47971	-0.303686	0.90121	-0.338182	-0.391355	0.523395	-0.182385	0.0764877
Aradu.M6ZUK	0.670698	-1.13371	-0.570713	0.970465	0.601961	-0.554517	0.614598	0.421352	-0.773186	0.704208	-0.24436	-1.22319
Aradu.M75VS	-0.148554	0.683341	1.02038	-0.0916057	-0.321241	-0.344441	0.0889899	-1.19353	0.384208	-0.124229	0.302695	-0.236494
Aradu.M785W	0.17525	1.51032	0.477307	0.936423	-0.441823	-0.457668	0.0131206	-0.0215814	-0.535472	-0.137816	-0.301317	-0.41341
Aradu.M7QN4	0.821946	-0.785611	-0.860716	1.23128	0.920596	-0.451183	-0.0150527	0.612725	-0.739999	0.445536	-0.580329	-1.03332
Aradu.M7RVI	-0.759917	1.56351	0.71405	-0.264481	-0.264764	-0.386953	0.18137	0.0226661	0.409788	-0.323235	0.194953	0.108535
Aradu.M7YF0	0.29553	-0.744783	-1.38811	0.689371	1.16361	-0.074414	0.339486	0.318077	-0.572407	0.817459	0.110637	-1.30352
Aradu.M8KJJ	-0.680424	1.30557	0.366463	-0.361727	-0.704601	0.288058	-0.275314	-0.23831	0.192784	-0.772783	0.601531	0.336253
Aradu.M8PFR	-0.665932	0.608014	0.870074	-0.431437	-0.958634	-0.425055	0.630837	0.144075	0.762233	-0.00269198	0.347491	-0.64423
Aradu.M8YF1	-0.257891	0.652577	-0.20847	-0.652118	-1.10556	-0.851906	0.842175	0.629441	0.755987	0.289085	0.752688	0.12551
Aradu.M9308	-0.761092	0.204604	0.419916	-0.904865	-0.708702	-0.0764619	0.602737	-0.376002	0.226069	-0.0799973	0.462979	0.839214
Aradu.M999T	-0.756741	1.04025	0.798939	-0.800101	-1.16937	-0.799451	0.10966	0.459197	0.994466	-0.168971	0.431074	0.404705
Aradu.M9E5N	-0.605729	0.609642	0.996601	-0.368487	-0.0724866	-0.605729	-0.090427	-0.605729	0.52209	-0.335888	0.215421	0.308801
Aradu.M9FCY	-0.678328	0.535812	0.744406	-1.28291	-0.494341	0.603255	-0.432549	-0.626853	0.548701	-0.695093	0.806253	0.54022
Aradu.M9UKA	0.766776	0.480873	-0.484116	-0.0209737	-0.528056	-0.991703	0.18982	-0.0332548	-0.0502189	0.0584371	0.821409	0.36154
Aradu.MA4F6	-1.25053	0.906209	0.427275	-1.42903	-0.88365	0.0994249	-0.00234672	0.434442	0.956148	-0.411377	0.42759	1.19224
Aradu.MA4R1	1.33332	-0.826759	-1.1855	1.08305	0.808939	-0.0414826	0.023501	0.432266	-0.722729	0.678508	-0.246668	-1.18668
Aradu.MA7FC	0.518296	0.182283	-1.01316	0.949373	0.0593655	-0.172156	0.762858	-1.02777	-1.17232	0.406898	0.227052	0.266769
Aradu.MCA4R	0.356072	0.240582	0.0819071	0.83792	-0.198486	-1.07908	1.04366	-0.512082	0.113411	0.624407	0.00570091	-0.83911
Aradu.MD214	1.29761	-0.852777	-1.248	1.05379	0.957149	-0.0249155	0.61373	0.191605	-0.814023	0.458953	-0.717979	-0.912724
Aradu.ME4LN	-0.629242	0.858094	1.16526	-0.16454	-0.873702	0.0644526	0.390472	-0.585486	0.356453	-0.341264	0.34261	0.560732
Aradu.MG2E6	-0.974038	-0.335889	0.0989101	-0.863021	-0.296963	0.739265	0.567812	-0.691124	0.0196946	0.00761697	0.63791	0.727457
Aradu.MIX60	1.11333	-0.414343	-0.964083	0.715981	1.00245	-0.570238	0.212941	0.23732	-0.568454	0.473915	-0.475766	-1.1067
Aradu.MJ7TV	-0.876377	0.00749646	-0.236601	-1.3591	-1.27379	-1.05296	0.656645	1.17896	0.812964	0.780085	0.867642	0.950669
Aradu.MK33V	-0.311836	0.408387	0.916311	-0.332499	-0.776173	-0.544161	0.919141	-0.2925	0.164363	0.303546	0.439951	-0.508563
Aradu.MK4VZ	1.02992	-0.306075	-0.953794	1.13084	1.0557	-0.0951155	-0.256183	0.321575	-0.542416	1.30703	-0.82468	-0.748319
Aradu.MK81W	0.550285	-0.523635	-0.841436	0.665141	0.757205	0.134138	0.172424	0.63589	-0.908327	0.358647	-0.315498	-0.480072
Aradu.MKZ2C	1.51917	-0.48839	-0.945114	1.49046	1.20775	0.0357744	-0.189501	-0.559123	-0.992089	0.176517	-0.553226	-1.03932
Aradu.ML6MA	-0.19751	-1.3973	-1.60259	-0.0553051	-0.307851	-1.14502	1.13251	0.886117	0.345717	1.08431	0.67591	0.927204
Aradu.ML7BR	0.222667	0.663791	0.0219836	-0.139786	-1.0177	-0.804413	0.369362	-0.454677	0.78698	0.152273	0.777721	0.0358675
Aradu.MM1X2	-0.0623238	-0.260708	1.05977	0.559814	-0.138987	-0.0456873	0.0386366	-1.2606	-0.315704	-0.0659979	0.246796	-0.581278
Aradu.MM2LQ	1.08619	-0.377999	-1.42648	1.02545	0.976582	-0.330406	0.106095	0.776907	-0.504301	0.411168	-0.655485	-0.900669
Aradu.MM4U6	-0.724442	0.30989	0.0116595	-0.0623203	-0.328518	0.423269	-0.170638	-0.417951	-0.043419	-0.0244186	0.147671	0.099242
Aradu.MN8D0	-0.476476	-0.287738	-0.934487	-0.0577966	-0.517601	0.131702	0.635564	-0.612092	0.615725	0.416796	0.721061	0.582414
Aradu.MS621	-0.946787	1.28069	0.383273	-1.05075	-1.12714	-0.498808	-0.0339077	0.870309	0.774895	-0.269439	0.470911	0.382094
Aradu.MS8HK	-0.712017	0.710082	0.756245	-0.712017	-0.347613	-0.333881	-0.535825	-0.259919	1.08843	-0.274145	0.161369	0.0133487
Aradu.MSQ8X	0.860758	-0.48361	-1.11398	1.02318	1.07923	-0.167542	0.169453	0.313763	-0.693849	0.357501	-0.784235	-0.400513
Aradu.MTS9G	0.0737283	-0.989414	-0.968272	1.25069	0.957202	-0.033776	0.833534	-0.562275	-0.698117	0.81959	-0.538912	-0.517032
Aradu.MU261	0.209258	1.42627	0.756124	0.0856925	-0.917205	-0.595343	-0.0660971	0.0525183	0.257666	-0.427829	0.0259691	0.119561
Aradu.MU3LB	0.898603	-0.612252	-1.03278	1.20032	0.919321	0.174766	0.403166	-0.388687	-1.22698	0.554446	-0.548299	-0.657331
Aradu.MVB2G	-1.02054	1.22939	1.69066	-0.716074	-1.25721	-0.0622548	0.00283957	-0.165913	0.477428	-0.479911	0.0900294	0.458511
Aradu.MW3I2	-0.632956	0.481503	0.884994	-0.687169	-0.688568	-0.695752	0.566994	0.374314	0.604602	-0.420377	0.373089	0.612729
Aradu.MWD9S	0.849745	0.640229	0.71788	0.933631	0.417878	0.577354	-0.270886	-1.32065	-0.899543	-0.262384	0.0121721	-1.08691
Aradu.MZ5UW	-0.0796469	1.39175	0.921653	-0.0372736	-1.06401	-0.402841	0.325801	-0.62577	0.519765	-0.120456	-0.0562539	0.00667443
Aradu.MZ8KS	-1.16218	0.799905	1.15993	-0.90771	-1.00579	-0.586499	0.0634267	0.281716	0.950416	-0.259576	0.252592	0.362072
Aradu.MZB3N	0.372602	0.231073	-1.49497	0.693514	-0.0901989	-0.362875	0.667241	-0.850221	-0.058292	0.234456	0.294236	0.90102
Aradu.N0F41	1.32193	-0.135999	-1.02137	1.5007	0.728503	-0.358904	0.149094	-0.132142	-0.451398	0.663826	-0.694172	-1.31527
Aradu.N11FS	-1.10201	1.02598	1.15524	-1.12639	-0.905311	0.264928	0.233549	-0.648759	0.296069	-0.375892	0.613637	1.29721
Aradu.N1DAK	-0.456757	1.38377	1.54545	-0.538452	-0.696074	-0.425488	0.109389	-0.146693	-0.123398	-0.393037	0.0181084	0.213047
Aradu.N1IDK	0.251388	1.57548	0.502743	0.0259906	-1.23744	-1.04798	0.182099	0.497808	0.470595	-0.147969	-0.0511119	0.0687471
Aradu.N1UVT	-1.06536	1.45282	1.68278	-0.613042	-0.784855	0.274272	-0.256791	-0.474768	-0.108675	-0.603463	-0.0944103	0.833339
Aradu.N2Q04	0.552439	1.74679	1.37386	0.229242	0.31731	0.631929	-1.16936	-1.02742	-0.300857	-0.881434	-0.468912	-0.319485
Aradu.N3N49	-0.772054	0.969671	0.611164	-0.196435	-1.10294	-0.355612	0.218117	0.431356	0.415649	-0.16558	0.0374464	0.0895121
Aradu.N3W47	0.311909	-0.595779	-0.595779	1.19259	0.929393	0.136185	-0.357883	-0.414424	-0.529466	0.787118	-0.518715	-0.595779
Aradu.N59VW	-0.184289	1.31879	0.285782	0.0792813	-0.802667	-0.993772	0.638848	0.236783	0.570478	0.29046	-0.200839	-0.211484
Aradu.N5B8E	1.17601	0.0252499	-0.824581	1.501	1.13942	-0.182602	-0.0367309	-0.392163	-1.05853	0.465641	-0.773282	-1.15617
Aradu.N725Y	0.98258	-0.41319	-1.06236	0.686974	1.10525	-0.0977986	0.0365807	-0.0284545	-0.90577	0.128876	-0.836681	-0.744121
Aradu.N7HLR	-0.315515	1.14266	1.4872	-0.237096	-0.611229	0.45667	-0.266139	-0.555922	0.00949241	-0.718386	0.166639	-0.514086
Aradu.N7JT2	-0.543186	0.99568	1.22215	-0.656967	-0.922103	0.332517	-0.302717	-1.04495	0.758815	-0.467522	0.479551	0.689426
Aradu.N7KBZ	0.497131	1.17355	0.298023	0.389452	0.677501	-0.916239	-0.0396969	-0.00883698	-0.134118	0.599615	-0.299898	-0.779551
Aradu.N82V1	0.512554	0.724562	1.13527	0.402592	0.13028	0.403193	0.0494775	-1.28565	-0.792396	-0.771055	-0.381989	-0.473258
Aradu.N89Q4	0.411824	-1.68422	-1.52655	0.75273	0.704151	-0.222486	-0.0752831	0.200834	-0.0455693	1.14604	0.226126	-0.842208
Aradu.N93N0	0.741792	-0.551982	-1.17516	1.05445	1.07473	0.193162	0.0859296	-0.153507	-0.578818	0.904857	-0.92158	-0.800603
Aradu.N98FX	-0.311646	0.822181	1.54701	-0.263753	-0.617992	0.101529	0.389434	-0.695151	0.252676	-0.322206	-0.0291966	-0.335295
Aradu.N9KWN	0.613104	-0.283111	-0.283111	-0.283111	0.838724	0.857998	-0.283111	-0.283111	0.137393	-0.283111	-0.283111	-0.283111
Aradu.N9N6T	-0.59477	1.23668	0.655335	-0.480102	-0.768437	-0.0384338	0.906576	0.318845	-0.2321	-0.323174	-0.044784	-0.178808
Aradu.N9WZ2	1.56864	0.0728009	-0.56253	1.17656	1.12774	-0.187391	0.317661	-0.196865	-1.1585	-0.223776	-0.802527	-0.695008
Aradu.NC5JV	-0.853405	0.432067	0.114002	-0.770447	-1.26928	-0.842363	0.6129	-0.159426	1.12153	0.618068	0.74762	0.763464
Aradu.NCP7U	0.884251	-0.0941732	-0.562183	0.905397	0.911642	-0.647776	0.308426	0.184425	-0.295129	0.535629	-0.89286	-1.00017
Aradu.NE0BE	-0.655358	1.15418	1.06262	-1.21208	-0.811509	-0.756906	0.0447191	0.487906	0.743623	-0.498736	0.165486	0.729428
Aradu.NE81M	-0.362925	0.254317	0.147005	-0.0356727	0.182389	1.30638	-0.132053	-1.29176	-0.989357	-0.273182	0.139656	0.732876
Aradu.NG0Q2	0.987704	-0.663963	-0.762392	1.28396	0.649476	-0.569409	0.260945	0.293125	-1.06024	0.4114	-0.784341	-0.915505
Aradu.NG2QK	-0.720175	0.705766	0.857256	-1.20473	-1.12117	-0.790818	0.272761	0.699394	0.976014	-0.0524957	0.565174	0.232924
Aradu.NG4LQ	0.161513	-0.523122	0.103519	0.25432	-0.066705	0.859833	-0.220562	-1.50885	-0.387512	-0.692974	0.528799	0.180973
Aradu.NG8V7	1.11023	-0.646591	-1.1366	1.23828	1.06437	-0.217303	0.268029	-0.0758927	-0.881764	0.68277	-0.446498	-1.04336
Aradu.NH9RG	1.15018	-0.546536	-1.30843	0.753872	0.850494	-0.415704	-0.039348	0.565356	-0.535366	0.633655	-0.156888	-0.891995
Aradu.NI3N5	-0.261354	0.0473614	-0.519467	-0.465079	0.336693	1.03027	-0.427018	-0.565101	-0.471586	-0.218444	0.393762	1.4643
Aradu.NJ1ET	-0.35784	0.728398	1.76721	-0.656793	-0.606607	-0.459199	-0.282415	-0.738702	-0.0829522	-0.0623758	0.0857968	0.549597
Aradu.NJ1GS	0.859514	-1.03991	-1.07102	0.660324	0.923673	0.122799	0.253923	-0.36401	-0.754602	0.965574	-0.560778	-0.452032
Aradu.NK24P	1.03821	-0.744876	-1.51584	0.904611	1.15082	-0.0993356	0.00965981	0.18434	-0.160642	0.603346	0.114431	-0.832755
Aradu.NK4N0	1.04657	-0.11776	-1.10196	0.937209	0.922034	-0.3016	0.647738	0.874195	-0.942459	0.379495	-0.601663	-1.15543
Aradu.NL8HQ	-0.5556	1.00418	0.982345	-0.714893	-0.925195	-0.595244	0.202169	-0.132478	0.903561	-0.0404971	0.0240493	0.573155
Aradu.NP367	-0.465042	1.09818	1.3032	-0.39587	-0.747327	-0.596233	-0.115762	-0.378828	0.728822	-0.331425	0.0795081	0.483583
Aradu.NQ5JJ	-0.115399	0.51173	-0.0624281	0.467387	-0.995483	-0.52263	1.2114	-0.292099	0.633194	0.456543	0.351227	-0.734287
Aradu.NR0P7	-0.649583	1.05205	-0.189159	-0.766491	-0.550363	0.0275147	0.522194	-0.141001	-0.250659	-0.608178	0.725198	1.4597
Aradu.NR2UV	1.04709	-0.884595	-1.00801	1.1219	1.19363	-0.217181	-0.373737	0.00602818	-0.468944	0.0273974	-0.592388	-0.825136
Aradu.NS05P	0.130485	0.745897	0.718611	0.131825	-0.699642	-1.38054	0.311993	-0.189021	0.757534	0.418572	0.0266089	0.0308244
Aradu.NSR89	0.750911	0.396463	-0.291951	0.54168	0.382697	0.309662	-0.72641	-1.26497	-0.418205	0.0365408	0.507362	0.267755
Aradu.NT394	-0.301632	0.668156	0.0428141	-0.535702	-0.545826	0.0389241	0.818499	0.0521999	0.456638	-0.268351	0.493964	0.190623
Aradu.NT9AZ	1.11577	0.907669	-0.299043	0.393528	-0.419513	-0.853446	0.0924006	0.12578	0.0453547	-0.57651	0.418055	0.138776
Aradu.NTQ7W	-0.961209	1.05964	0.93756	-1.04776	-0.993873	-0.164658	0.0256717	0.443016	0.838127	-0.431391	0.435853	0.739738
Aradu.NUM7I	-0.639549	0.709496	0.825193	-0.361433	-0.936873	-0.669944	0.335348	0.314924	0.451423	-0.062183	0.239837	-0.105666
Aradu.NUY55	-0.658653	1.15078	0.747933	-1.048	-0.768295	-0.487741	-0.0269181	0.431826	0.674489	-0.151216	0.36517	0.958759
Aradu.NV5R4	0.353499	-0.725894	-0.725894	0.96423	0.645679	-0.0342538	0.413026	-0.643153	-0.583632	0.6004	-0.642914	-0.540195
Aradu.NX4M4	0.445836	0.753844	0.192744	0.299762	-0.223574	-0.381558	0.228417	-0.835209	0.258379	0.0251756	-0.089456	-0.922706
Aradu.NXY6C	1.1658	-0.751478	-1.07928	1.1973	0.984592	-0.450358	0.329495	0.070053	-0.652211	0.628869	-0.428118	-0.71687
Aradu.NY77B	-0.434749	0.331952	0.307653	0.026559	-0.41092	-0.0158013	-0.0818146	-0.582943	-0.648446	-0.794839	0.301839	1.13865
Aradu.P0AHC	0.802402	-0.523095	-0.482017	1.34616	0.679634	-0.459785	0.167824	-0.373062	-0.405489	0.390004	-0.376788	-0.657264
Aradu.P1L4K	-0.233403	0.97069	0.770411	-0.264078	-0.327351	-0.184725	-0.169724	-0.122075	0.358676	-0.342572	0.177356	-0.690809
Aradu.P1VBB	0.0336972	0.248245	0.613661	-0.553928	-0.29753	-0.849363	0.319448	0.443746	0.000355382	-0.00170545	0.398712	-0.292403
Aradu.P28IF	0.916264	0.139697	-0.802283	1.58496	0.799298	-0.522034	0.0871676	0.213169	-0.400212	0.491814	-0.950276	-0.947276
Aradu.P2N5M	-0.71193	0.452435	0.907713	-0.206091	-0.479823	0.705869	-0.0198685	-0.659707	-0.352957	-0.694808	0.381882	0.418502
Aradu.P34U4	1.06254	-0.841863	-0.866705	1.05901	0.453867	-0.540806	-0.202346	1.32487	-0.839308	0.664421	-0.488339	-0.558251
Aradu.P3BGN	1.00117	-0.966643	-0.206148	1.82302	1.38499	-0.54032	0.0326502	-0.302905	-0.8347	0.0822082	-0.845249	-0.507907
Aradu.P3X2X	1.0809	-0.741233	-0.54667	1.44593	1.14143	-0.0229462	-0.156089	-0.741233	-0.692118	-0.0467026	-0.6803	-0.658029
Aradu.P3XD1	-0.583437	0.274327	0.46826	0.415783	-0.525045	-1.08735	-0.43246	-0.29595	0.35657	0.651914	0.527033	-0.274444
Aradu.P4PR7	-0.656877	1.10788	1.04252	-0.759234	-0.914254	-1.06907	0.0431454	0.189508	0.872666	-0.311121	0.20719	0.378356
Aradu.P4VGE	-0.198247	-0.921236	-1.34744	-0.00132054	-0.0505502	-0.365045	1.31019	1.03038	-0.264608	1.06629	-0.14553	0.31059
Aradu.P5HL2	-0.20095	0.429688	1.32759	-0.285492	-0.379644	-0.0451222	-0.474133	-0.849388	0.221913	-0.390214	0.271794	0.754681
Aradu.P72BL	2.015	-0.520318	-0.664376	1.41355	0.617685	-0.47201	-0.199479	-0.528158	-0.653964	0.109512	-0.69699	-0.735572
Aradu.P74D5	-0.300633	0.920668	-0.627083	-0.0115465	0.175792	-0.257548	-0.292806	-0.229081	0.220996	-0.369558	-0.134061	1.6384
Aradu.P8VXJ	-0.553453	1.34866	1.12284	-0.79906	-0.714351	-0.571861	-0.146793	-0.0515924	0.859958	-0.253974	0.196796	0.508343
Aradu.P9DZZ	1.26198	-0.66446	-1.04225	1.30065	0.71615	-0.00211364	0.0119923	-0.261755	-0.850198	0.350925	-0.733367	-0.81611
Aradu.P9H52	-0.868537	0.773742	0.435929	-0.799204	-0.910526	-0.651376	0.37699	0.105455	0.990065	-0.231154	0.701152	0.414151
Aradu.P9JVV	1.10095	-0.682484	-0.568919	1.37342	1.28649	-0.464505	0.225574	-0.149377	-0.598665	0.11063	-0.848439	-1.07803
Aradu.PB3H1	0.636988	1.7982	-0.0441703	0.450288	-0.416163	-0.888738	0.0141029	0.56364	-0.0975278	0.278864	-0.27716	-0.905357
Aradu.PBY44	-0.738938	1.00287	-0.101874	-0.930651	-0.716125	-0.563883	0.335553	0.485123	0.235782	0.292483	-0.00582208	1.00037
Aradu.PF7SH	-0.562727	1.42972	0.921075	-0.728363	-1.01325	-0.435041	-0.377244	-0.340071	0.502759	-0.387395	0.483951	0.576457
Aradu.PG3K0	-1.16277	1.10585	0.810505	-1.84932	-0.635306	-0.544835	0.497126	0.263851	0.65216	-0.129128	0.332847	0.899235
Aradu.PG6LA	0.862352	-0.726424	-1.00162	0.77716	1.03057	-0.102918	1.02314	-0.157551	-0.835555	0.727156	-0.804711	-1.08046
Aradu.PH3JT	0.339019	1.15122	1.04049	0.839058	-0.586549	-0.941077	-0.197941	-0.440492	-0.0396452	-0.17001	-0.0860035	-0.646428
Aradu.PHY5X	0.623446	-0.687217	-1.21313	0.791979	1.00701	0.144439	0.114454	0.481806	-1.36826	-0.0768588	-0.265107	-0.282263
Aradu.PJ4TM	1.11331	0.508202	0.0455974	-0.30899	-0.57457	0.201537	0.21491	-0.996703	-0.447242	0.214687	0.621683	-0.378068
Aradu.PJ5IQ	-0.540884	0.83369	0.752444	-0.679546	-1.30986	-0.727643	0.285994	0.665328	0.880636	-0.312225	0.32576	0.649113
Aradu.PJ6U1	-0.635646	0.900223	0.597993	-1.10963	-1.19422	-0.100685	-0.0018865	0.971014	0.763652	0.12299	0.550225	0.745038
Aradu.PJ77P	-0.237567	-0.021409	-0.52785	-0.317256	-0.656716	-0.865876	1.43947	-0.186137	0.232431	0.372938	0.573124	0.724549
Aradu.PKA69	0.977213	-0.973026	-1.27127	0.786424	0.312466	-0.0283898	-0.0642792	0.642494	-0.143616	0.443359	-0.389444	-0.676202
Aradu.PL7IJ	-0.736204	0.62359	0.85551	-0.685221	-0.588232	-0.749859	0.298636	-0.394134	0.676672	-0.360587	0.446804	1.11088
Aradu.PM4BT	0.706207	1.46893	0.55056	-0.112351	-0.585326	-0.951764	-0.342756	-0.326765	-0.0362254	0.0375357	0.704557	-0.152149
Aradu.PQ5HC	0.507643	-0.547327	-0.695342	2.00729	0.717523	-0.362901	0.0911124	-0.529043	-0.770859	0.428641	-0.671582	-0.814288
Aradu.PQW7I	0.897257	-0.323075	-1.29487	0.799784	0.995012	-0.110617	0.115866	0.518188	-0.453226	0.730425	-0.380028	-1.32429
Aradu.PRR6C	0.761562	0.555135	-0.341683	0.750863	1.07782	-0.507632	-0.568623	1.07974	-0.648774	0.0161252	-0.590071	-0.75374
Aradu.PS89J	-0.722246	1.13965	0.632052	-1.08853	-0.769876	-0.584572	0.235082	0.254164	0.989514	0.0523848	0.313811	0.563084
Aradu.PTU5T	0.417583	-0.676261	-0.992684	0.110386	0.931119	-0.147624	0.132579	0.40157	-0.294129	0.25466	-0.404239	-1.01787
Aradu.PU63R	0.660216	-0.811832	-0.736516	1.14561	0.783474	-0.262314	0.409166	-0.558046	-0.660299	1.27673	-0.511871	-0.704613
Aradu.PU6SR	-0.361057	1.02407	1.1247	-0.525781	-1.11286	-0.488021	0.183491	0.123316	0.634481	-0.29427	0.280858	0.250554
Aradu.PUJ92	-0.182899	0.064154	0.192062	0.279281	0.0350642	0.122087	1.09507	-1.05472	-0.449705	0.838695	-0.117133	0.19179
Aradu.PUK9N	-1.00827	0.599675	0.387357	-0.243542	-0.672063	-0.358271	0.394758	-0.684312	0.0473785	-0.259702	0.532314	0.643
Aradu.PUZ74	-0.860834	-0.130712	-0.335568	-1.11566	-1.19045	-0.84817	0.958863	0.917252	0.691671	0.849672	0.884813	0.776655
Aradu.PVS6M	0.300152	-0.686621	-0.461903	-0.0954992	-0.138449	0.733672	-0.0647463	0.504108	-0.649582	0.261065	-0.523847	-0.0206951
Aradu.PWT4W	0.853868	-0.971305	-0.515307	1.04518	1.01816	-0.135259	-0.692133	-0.0174956	-0.913248	0.395562	-0.483817	-0.774389
Aradu.PX1SQ	1.11016	-0.721126	-0.673607	1.38501	1.075	0.327312	0.0810394	-0.459575	-1.15252	0.262865	-0.638479	-1.1459
Aradu.PX1XB	1.42744	-0.721591	-0.744446	1.47117	1.09234	-0.0270991	-0.0597984	-0.28862	-0.680981	0.226419	-0.611196	-1.13429
Aradu.PXA74	-0.208723	1.39378	1.65914	-0.246383	-0.260735	-0.217494	-0.232358	-0.337601	-0.130179	-0.63332	-0.213036	0.363219
Aradu.PXH87	-0.0469691	-0.752173	-0.448831	0.694152	0.25773	-0.0765218	1.29228	-0.36715	-0.711329	0.93808	-0.474932	-0.617927
Aradu.PXM5A	-0.808441	-0.119708	0.722059	-0.784983	-0.970258	0.85475	-0.173452	-0.726529	0.685871	-0.169511	0.570651	0.751872
Aradu.PY313	-0.738268	1.00856	0.695178	-1.10535	-0.519877	-0.355969	-0.621593	0.936448	1.01496	-0.863298	0.368798	-0.530141
Aradu.PY4IT	-0.414428	1.30733	1.13573	-0.988003	-1.01753	-0.739355	0.193914	-0.143091	0.408968	0.0896719	0.0787205	0.287726
Aradu.PZ38W	0.863854	0.314123	1.01679	0.916423	0.0353236	-0.411776	-0.341313	-1.57614	-0.274629	-0.019552	-0.313307	0.283262
Aradu.PZB3C	0.49141	-0.773378	-1.41462	0.737883	1.32078	0.310953	0.234884	0.3296	-0.856665	0.296471	-0.752454	-0.615462
Aradu.Q03T7	-0.284502	1.29808	1.3296	-0.341213	-0.725459	-0.723959	-0.152286	-0.0348553	0.73136	-0.454075	0.123266	-0.0610011
Aradu.Q0IPN	1.02871	-0.0852202	-0.875191	0.622876	0.696254	-0.253461	0.332295	0.852187	-0.668634	0.522351	-0.767359	-1.174
Aradu.Q0NF8	-0.112927	-0.478812	-0.35734	-0.474835	0.133456	-1.09318	0.371799	1.67953	0.0668552	0.786474	0.310443	-1.3844
Aradu.Q0ZWM	-0.593772	-0.222049	-0.387381	-0.56438	-0.909656	-0.282668	0.688578	-0.270325	0.59326	1.16722	0.711515	0.288342
Aradu.Q29FA	-0.79236	0.357388	0.61635	-1.80734	-0.685304	-0.371253	0.0551112	0.430031	0.958754	0.00850124	0.727049	0.501473
Aradu.Q2VZ9	1.42897	-0.0693226	-1.21093	0.872073	0.796472	0.140539	0.561428	0.335925	-0.363868	0.0882371	-0.836042	-1.00072
Aradu.Q360E	0.302669	-0.837452	-1.12061	0.301923	0.254466	-1.15498	0.866898	0.995194	-0.323091	1.0643	-0.115543	-0.0644595
Aradu.Q39F2	1.29647	0.413726	-0.386638	0.957074	1.54173	0.201007	-0.901716	0.0205073	-0.683696	-0.597358	-0.9148	-1.17112
Aradu.Q4CGX	0.155862	1.10415	1.0266	0.429214	-0.951939	-0.0775926	-0.0860932	-0.371613	0.0576323	-0.562871	-0.192594	0.729797
Aradu.Q4JN9	0.706155	-1.36898	-0.890392	0.976402	0.468805	-0.574707	0.368345	0.566108	-0.693432	0.690111	-0.100095	-0.933493
Aradu.Q4YIY	0.437434	0.566278	0.959059	0.70856	-0.280342	-0.617409	0.532065	-0.791665	-0.57212	-0.158786	0.0953338	-0.673661
Aradu.Q53VT	-0.656825	1.48338	0.871452	-0.955748	-0.301307	0.151991	-0.513927	-0.807119	0.834268	-0.256265	0.234356	0.605205
Aradu.Q54JY	-0.162956	1.31092	-0.0353706	-0.127482	-0.747675	-1.73677	0.317475	0.241347	0.76162	0.469547	0.343284	0.199927
Aradu.Q5BZB	-0.0798293	1.09692	0.675808	0.0084165	-0.665585	-0.993486	0.0246259	-0.219961	0.458569	-0.206018	0.207175	0.210117
Aradu.Q5HYC	-0.358565	0.908749	0.7379	-0.123868	-0.896152	-0.288856	-0.0880791	-0.856552	0.220915	-0.261072	0.465167	0.509999
Aradu.Q6CRV	0.139385	-0.583197	-0.583197	0.681765	0.874083	0.0169209	-0.381105	0.108023	-0.55029	0.603179	-0.477233	-0.583197
Aradu.Q7P15	0.435132	1.48115	0.253063	0.0861394	-0.966686	-0.257438	-0.0887518	-0.0345974	0.816398	-0.455379	0.0251787	0.521865
Aradu.Q80P2	1.32088	-0.208005	-0.840686	1.28184	0.992762	-0.110627	0.501647	0.111349	-0.840777	0.575175	-0.905109	-1.31202
Aradu.Q84QR	-0.69228	1.48335	1.53116	-0.52956	-0.917959	-0.497744	0.29189	0.0365936	-0.0634539	-0.528194	0.0719339	0.686817
Aradu.Q8588	-0.171289	1.44822	0.368568	-0.716786	-0.40483	-0.28193	0.582572	-0.0216414	0.356503	-0.3799	0.355035	-0.618027
Aradu.Q8JL3	-0.471324	0.567126	0.408455	-1.28117	-1.10535	-0.846855	0.339614	0.853355	0.744248	-0.280801	0.601989	0.379193
Aradu.Q8T5G	-0.361566	-0.322767	0.069579	0.45295	0.524576	1.00624	-0.489518	-1.76691	-0.561421	-0.178039	0.504275	0.561063
Aradu.Q8UAQ	0.388741	-0.833469	-0.821387	0.568361	0.410994	-0.660409	0.116924	0.905918	-0.959977	0.402277	-0.419274	-0.642982
Aradu.Q937X	-0.313937	1.12811	0.647774	-0.430943	-0.779719	-0.863146	0.19206	0.430123	0.468702	-0.381564	0.18001	0.345288
Aradu.Q9HBF	-0.663684	1.28741	1.02574	-0.864656	-0.734969	0.0909142	-0.182408	-0.12527	0.518798	-0.0615479	0.341316	0.894992
Aradu.Q9LEZ	-0.560285	0.468562	0.790439	0.0346012	-0.882085	-0.764452	0.60755	-0.92779	0.0808012	0.0769983	0.191102	0.75184
Aradu.Q9YKL	-0.414756	0.0769235	-0.38352	-0.41902	-0.125659	1.17738	-0.118455	-0.540687	-0.54517	-0.51284	0.755329	1.17942
Aradu.QBS8R	0.421086	-0.975224	-1.16391	0.585237	0.736	-0.0766678	0.182306	0.451392	-0.877901	0.40599	-0.419614	-0.339798
Aradu.QD6DL	-0.0347368	0.0591951	-0.225358	0.260441	-0.194594	0.216033	0.0829103	0.0746798	0.926435	-0.721744	0.643787	-0.566072
Aradu.QES0M	0.192229	-0.61101	-1.25063	-0.57334	1.30827	-0.638174	0.421237	0.0907311	0.435473	0.345805	0.171839	-0.613439
Aradu.QF3Z3	-0.327975	0.823527	0.0430922	-0.295377	-0.968643	-0.561784	0.557063	0.599615	0.320869	0.0935563	0.739965	-0.354253
Aradu.QG2PF	-0.515558	0.660609	0.962399	-0.317218	-1.11187	-0.464155	0.790068	0.198637	0.608226	0.125114	0.374458	-0.183163
Aradu.QG5V9	0	0	0	0	0	0	0	0	0	0	0	0
Aradu.QH0IG	-0.535544	-0.0804592	-0.305674	-0.461739	0.778794	0.809381	-0.56327	-0.56327	-0.56327	-0.466482	0.403764	1.2364
Aradu.QJ19Z	-1.19851	1.07581	0.778087	-0.731681	-1.24549	-0.619254	0.23722	0.255994	1.00559	-0.0753159	0.439133	0.951882
Aradu.QL2WJ	0.225512	0.0885945	0.518326	1.10063	-0.284543	0.569643	-0.374025	-2.01223	0.008015	0.326514	0.140424	0.151459
Aradu.QPB15	-0.769299	1.04786	1.15685	-1.07121	-0.818735	0.671072	-0.563078	-0.620347	0.323488	-0.919153	0.469099	0.744317
Aradu.QQ0H9	-0.835305	0.865529	0.800057	-1.25699	-1.02553	-0.600553	-0.0227705	0.767368	0.801281	-0.371623	0.442545	0.593242
Aradu.QQB0D	-0.739132	0.81976	0.277381	0.251083	-0.396235	-0.949924	-0.0698238	-0.379083	1.07249	0.336983	0.380331	0.636317
Aradu.QQF2S	-1.02097	0.874695	0.229546	-1.02537	-0.213144	0.44493	-0.247461	-0.658071	-0.113839	-0.787311	0.284018	1.87712
Aradu.QS2D1	-0.775449	-0.151328	0.0453397	-0.658138	-0.58059	0.0892687	0.838263	-0.535785	-0.325197	0.161102	0.593196	1.38355
Aradu.QS6FI	0.116716	0.947164	0.523316	-0.0609074	-0.785833	-0.509132	0.489594	-0.180737	-0.0736993	-0.259056	-0.118005	0.836738
Aradu.QS9NG	-0.417366	1.20437	0.912038	-0.302187	-0.768362	-0.890051	0.176954	0.399998	0.530895	-0.190615	0.120805	-0.163001
Aradu.QSR66	0.563522	0.0950729	-0.827056	0.667269	1.60115	0.294829	0.160352	-0.029199	-1.01846	-0.00404618	-0.483671	-1.07907
Aradu.QV0NG	0.800814	-0.806423	-0.81628	0.834521	0.454912	0.0599162	-0.314118	0.347698	-0.333915	0.334098	-0.415964	-1.02394
Aradu.QV5DJ	0.874521	-0.00782024	-1.06962	1.07516	1.15481	-0.521665	0.260596	0.2208	-0.813829	0.370327	-0.528565	-0.80781
Aradu.QVY8H	1.96515	-0.864137	0.0476538	0.656118	1.07263	-0.682107	0.154261	-0.748091	-0.715264	0.42631	-0.743074	-0.875491
Aradu.QX5DL	-0.0686809	2.05459	1.05134	-0.455894	-0.446474	-0.0454255	-0.733236	-0.194562	-0.0423043	-0.893194	-0.040747	0.795271
Aradu.QX5M9	0.316193	-1.17242	-0.956922	-0.645099	1.1855	-0.0226218	0.31604	0.554348	-0.680068	-0.0213411	0.309489	0.233401
Aradu.QX8PT	-0.362445	1.91546	0.312281	-0.362445	-0.362445	0.10641	-0.362445	-0.362445	0.248142	-0.362445	0.545207	-0.362445
Aradu.QXJ49	0.819067	-0.675108	-1.45701	0.765463	0.787692	-0.579935	0.302461	0.443152	-0.818795	0.71468	-0.361971	-0.692172
Aradu.QY456	-1.22939	0.701653	0.125134	-0.340338	-1.35955	-0.548984	0.21308	0.0398141	1.23144	0.190815	0.344538	0.927289
Aradu.QYM4C	-0.750175	1.42827	0.0403448	-0.791449	-0.208077	0.191314	-0.605994	0.502384	0.564617	-0.682318	0.803644	0.984811
Aradu.R082J	-0.676182	1.08197	0.89431	-0.0423443	-0.888672	-0.180773	0.667823	-0.301196	-0.0366128	-0.55111	0.0111513	0.385806
Aradu.R0AGT	0.982526	-0.421067	-1.28288	0.737486	0.966632	-0.0680446	0.332529	-0.0993267	-0.509833	0.8104	-0.411784	-1.104
Aradu.R0BLH	-0.682136	0.540618	1.13535	-0.394642	-0.336023	0.656191	-0.187286	-1.14101	-0.361436	-0.408385	0.238198	0.655574
Aradu.R0Z7V	0.82039	-0.924336	-1.39643	0.75447	0.889934	-0.0846834	0.349848	0.387539	-0.559327	0.754856	-0.445173	-0.701252
Aradu.R1MVQ	-0.219547	0.289067	0.0282816	-1.1873	-0.816757	-0.497283	0.773592	0.1431	1.1311	-0.64045	0.769817	0.534255
Aradu.R3I62	0.269001	-0.958854	-1.29319	1.08613	0.651314	0.0653767	0.778726	-0.705	-0.506746	0.984676	-0.224193	-0.193554
Aradu.R3SU9	0.402463	1.35432	0.909025	0.21348	0.575496	0.909257	-0.13661	-1.07519	-1.33436	-0.742161	-0.251551	0.0580469
Aradu.R4BPQ	-0.572281	0.618939	0.445037	-0.805253	-0.345612	-0.0293998	0.461006	-0.8127	0.73814	-0.429802	0.615993	0.406582
Aradu.R4E1U	-0.459557	0.761805	-0.472977	-0.118116	-1.1727	-0.830054	0.724071	0.495014	0.712522	0.140509	0.371259	0.335142
Aradu.R4H3N	-0.689808	1.05438	1.26444	-0.761985	-1.1099	-0.582445	0.187154	-0.249207	0.839733	-0.244684	0.144583	0.838174
Aradu.R4HDF	0.951563	-0.671444	-1.29173	1.23114	0.668927	-0.449256	0.448002	0.137753	-0.591594	0.955385	-0.279083	-1.10315
Aradu.R5E06	-0.406885	1.04474	0.876899	-0.902921	-0.792654	-1.12913	0.0785481	0.0413896	0.825722	-0.235443	0.193686	0.897697
Aradu.R5JPX	1.5557	-0.244455	-1.07544	1.01904	1.06616	-0.169304	0.0883929	0.0324273	-0.672952	0.20476	-0.644655	-1.17686
Aradu.R61PZ	-0.278607	1.17975	0.338506	-0.211955	-1.10585	-0.684604	1.01023	0.302252	0.309013	-0.00040033	0.0634745	-0.120982
Aradu.R6AD1	0.490764	-1.14523	-1.70034	0.379649	0.29767	-0.354994	0.347435	0.647966	-0.0315504	0.790513	0.126161	-0.536229
Aradu.R72MD	1.04958	-0.833303	-1.38954	1.08013	0.898393	-0.102197	0.377192	0.00411671	-0.586878	0.876647	-0.449556	-0.914478
Aradu.R77UT	0.227938	-0.63323	-0.87881	0.994882	0.677563	-0.222703	0.37458	-0.361485	-0.566839	0.448966	-0.576775	-0.454927
Aradu.R7JCU	-0.396834	1.39772	1.32811	0.317483	-0.267606	-0.390004	-0.219739	-0.684584	0.172397	-0.735762	-0.219757	0.0576725
Aradu.R7YY4	-0.967037	0.888387	0.575287	-0.851027	-1.09036	-0.542285	0.190678	0.364043	0.786259	-0.252125	0.521529	0.721848
Aradu.R8RVW	1.12962	-0.50307	-1.12355	1.15335	1.17667	0.0545941	0.0240788	-0.314098	-0.964363	0.424037	-0.538675	-0.779852
Aradu.R908P	0.216964	-0.471279	-0.861658	0.249204	1.10879	0.133128	0.608808	-0.0827593	-0.637667	0.172814	-0.676163	0.0736575
Aradu.R93S8	-0.227879	0.831253	-0.319023	-0.0257784	0.0779328	0.340863	-0.504261	-1.43684	-0.259401	0.146247	0.712547	0.799983
Aradu.R9A82	0.192962	0.317359	-0.380949	0.274716	-0.244503	-0.135971	0.502502	-0.988503	-0.174224	0.153867	0.270226	-0.533117
Aradu.R9BU7	1.02558	-0.233808	-0.941181	1.08927	0.89271	-0.475358	0.665523	0.219654	-1.07165	0.635696	-0.362514	-1.52645
Aradu.R9NWV	0.667987	0.540665	-0.00576201	0.801159	-0.74987	-0.693977	-0.0447969	-0.232137	-0.468373	0.24775	0.156973	-0.253124
Aradu.R9VGI	0.171289	1.07774	0.633844	0.0863886	-0.352544	-0.829612	-0.0256242	-0.0844676	0.244872	-0.292937	0.366195	-0.0990354
Aradu.R9XZF	-0.0445219	0.548397	-0.783261	-0.236485	-1.01162	-0.56739	0.663677	-0.422907	0.808299	0.36807	0.502052	-0.00984466
Aradu.RA0B1	0.371265	1.40862	0.13394	0.028835	-0.785894	-0.956354	0.422885	-0.37303	0.516924	0.132825	0.389293	-0.117831
Aradu.RD5VZ	0.624693	-0.831126	-0.831126	0.526468	1.57372	0.645108	0.146445	-0.42854	-0.718243	-0.155861	-0.609824	-0.6195
Aradu.RDI6I	0.354811	1.1226	0.326304	0.338575	-0.355287	-0.928359	0.495139	0.187477	0.136344	-0.0356702	0.188539	-0.804371
Aradu.RDM6K	-0.457523	1.25017	0.723084	-0.569727	-0.632181	-0.789969	0.0479071	0.34027	0.670393	-0.683702	0.40896	0.181028
Aradu.RER3E	-0.0240167	1.41511	1.31364	-0.43934	-0.391898	-0.307231	-0.42155	-0.114369	0.391288	-0.966752	-0.151171	0.0442455
Aradu.RFH8Y	0.449069	-0.871198	-0.715061	0.905237	0.63843	0.11079	1.23606	-0.752693	-0.71329	0.806701	-0.63469	-0.684479
Aradu.RG56V	-1.12044	-0.224174	0.932503	-0.718241	-0.993363	0.151906	0.463179	-0.555578	0.510955	0.0550614	0.777672	0.70128
Aradu.RG96H	0.799718	-0.197465	-0.731583	1.08044	0.492036	0.208779	-0.386003	0.677014	-0.42267	-0.259416	-0.449605	-0.731583
Aradu.RGH56	-0.445772	1.12197	0.345006	0.192447	-0.62545	-0.445717	0.513271	-0.541688	-0.50962	-0.0455781	0.353374	0.297409
Aradu.RH3MJ	0.527504	-0.575023	-0.436639	0.627175	0.834702	-0.236854	-0.228193	0.988203	-0.446276	0.516898	-0.838085	-1.45546
Aradu.RH99R	-0.891815	0.161064	0.0776296	-1.22203	-0.895605	-0.453612	0.667107	0.225467	0.274631	0.207244	0.727343	1.41768
Aradu.RHB17	1.42069	-0.708422	-1.25244	1.30289	0.825667	-0.197125	0.17892	0.307383	-0.752434	0.455759	-0.376999	-1.29044
Aradu.RII5F	-0.252297	0.647111	-0.914083	-0.140197	0.121102	-0.259828	0.0877122	-0.730192	0.41594	0.534872	0.615409	-0.734695
Aradu.RJ2CI	0.177965	0.887272	0.582494	0.317556	-0.980107	-0.913761	-0.000335426	-0.534544	0.754392	0.088017	0.15652	0.233937
Aradu.RJZ23	1.21299	-0.505471	-0.741608	0.896709	0.785439	-0.763712	0.235259	0.68467	-0.47235	0.435724	-0.619624	-1.44891
Aradu.RK3N5	0.171479	-0.459477	-1.11856	0.836001	0.34445	0.859814	0.712469	-0.118904	0.381398	-0.136604	0.0424912	-1.15049
Aradu.RK78S	0.863755	-1.37659	-1.33949	1.23201	0.599979	-0.0924508	0.969613	-0.557918	-0.648437	0.76909	-0.0547207	-0.434739
Aradu.RM7LR	-0.867474	-0.445382	-0.565432	-0.520556	-1.03537	-1.57338	1.08007	0.647326	0.86129	1.09973	0.989429	0.673511
Aradu.RP4CG	-0.598309	1.1467	0.814316	-0.220306	-0.7313	0.226726	0.397571	0.0255457	0.22303	-0.516803	0.00784414	-0.0512666
Aradu.RP5AZ	0.206939	0.873973	0.513504	-0.455459	-0.189448	-0.612362	-0.208214	-0.191253	0.704472	-0.399743	-0.186891	-0.39686
Aradu.RP61F	0.0126472	0.870391	1.58574	0.292143	-0.472114	-0.528997	0.0203908	-0.985283	-0.0179238	-0.0303103	-0.110228	-0.229553
Aradu.RP6HI	0.0996173	1.1174	-0.399971	0.0829309	-0.554048	-0.772517	0.124395	0.250081	0.108695	0.385298	0.407636	-0.439198
Aradu.RPS70	-0.480721	0.00441663	1.79551	-0.524735	-0.250469	-0.0717058	-0.207821	-0.81824	0.532536	-0.392695	0.303926	0.434508
Aradu.RQ9T9	1.2026	-0.742589	-0.974371	1.08285	0.858854	-0.229535	0.588684	-0.141713	-0.748165	0.663571	-0.682068	-0.974209
Aradu.RQQ24	0.47724	-1.44666	-0.758563	1.11233	0.954289	0.369181	0.413547	-0.312747	-1.17042	0.359123	-0.223344	-0.857449
Aradu.RR1FI	0.069179	-0.617115	-0.573671	-0.0903446	0.139578	-0.283242	0.37941	0.0544269	-0.116223	0.222762	-0.268579	0.0382161
Aradu.RT4IP	0.156482	1.01297	1.65981	0.498788	-0.82336	0.202172	-0.0907564	-0.797598	-0.00880653	-0.122855	-0.395271	-0.313028
Aradu.RTF2M	1.19793	-0.162994	-0.786861	1.31443	0.756043	-0.394524	0.450179	-0.0475625	-0.735894	0.60767	-0.789634	-1.18776
Aradu.RU466	-0.411877	1.19479	0.729195	-0.712706	-0.656226	-0.907763	-0.17627	0.67434	0.810586	-0.130751	0.296244	0.0914902
Aradu.RV6BG	-0.394364	0.526893	0.762472	-0.722421	-0.819443	-0.658229	0.203971	0.304171	0.87013	-0.267216	0.472203	0.073355
Aradu.RV9UM	0.596433	-0.067721	0.371588	0.957855	-0.224317	-0.0105105	0.336638	-1.71303	-0.333977	0.40338	0.10301	-1.01894
Aradu.RVF1V	-1.03569	0.754544	0.946351	-0.842518	-0.479047	0.587012	-0.173493	-1.01576	0.066231	-0.611744	0.620797	0.607144
Aradu.RVU0Z	0.216576	-0.501913	-0.916439	0.179733	1.04571	-0.820708	0.361075	0.596954	-0.514626	0.423909	-0.257654	-0.588868
Aradu.RW3HI	-1.07965	1.45087	0.971403	-0.931938	-0.771649	-0.103974	0.0294056	0.117579	0.673833	-0.775472	0.364953	1.05601
Aradu.RWZ7G	1.47726	-0.428047	-0.644317	1.38512	0.687579	-0.560147	-0.014893	0.344693	-0.797394	0.491845	-0.634717	-1.43685
Aradu.RXK4E	0.85475	-1.03232	-1.28135	1.20273	0.728063	-0.70569	0.746022	0.236323	-0.793514	1.0629	-0.331187	-0.643803
Aradu.RY508	-0.623118	1.34057	1.15971	-0.417521	-0.85856	0.106613	0.817543	-0.499975	0.33342	-0.355966	0.0255668	0.310539
Aradu.RYN4L	-0.626591	0.756884	1.17666	-0.552125	-1.08504	-0.443324	-0.0601966	-0.817897	1.18877	0.143444	0.348386	0.752475
Aradu.RYS1S	-0.905978	0.455528	1.09483	-0.527504	-0.306087	1.07338	-0.0517252	-0.993623	-0.329758	-0.462973	0.383118	0.929016
Aradu.RZ908	1.21914	-0.472094	-1.08432	1.31101	0.907842	-0.0872769	0.334282	-0.0843533	-0.712374	0.590723	-0.558603	-1.05917
Aradu.RZL7M	1.35503	-0.329847	-0.561582	1.32819	1.07463	-0.822178	-0.346866	0.0911368	-0.642494	0.149358	-0.312788	-1.19634
Aradu.S0HMQ	-0.316656	0.400466	0.467996	-0.774614	-0.395617	0.702849	-0.62899	-0.39811	0.721738	-0.411042	0.966537	0.469627
Aradu.S0HX0	-0.786003	0.594441	0.855175	-1.32992	-1.29254	0.292786	0.147989	0.11216	0.401272	-0.3718	0.369912	0.939922
Aradu.S168N	-0.236729	-0.648143	-0.648143	0.14296	-0.126221	0.0233903	0.394076	0.0477623	-0.00248838	-0.0408345	0.128389	-0.124047
Aradu.S1FS5	-0.82273	0.43024	1.34517	-0.640452	-0.993858	-0.0192266	-0.165041	-0.785711	0.994472	-0.429583	0.355137	0.892987
Aradu.S2UYW	0.0118497	1.22334	1.0246	0.077939	0.108188	0.683898	-0.810988	-1.54438	-0.480016	-0.440724	0.309807	0.261578
Aradu.S37LQ	-0.978019	0.952276	0.871786	-0.923089	-0.990368	-0.14483	-0.154503	-0.00358	0.712611	-0.432886	0.563214	0.863345
Aradu.S3B4X	0.975255	-0.768811	-0.835592	0.845577	0.318386	0.405314	0.0202549	0.507045	-0.295728	-0.589858	-0.269249	-0.709113
Aradu.S4DGV	-0.670389	0.0885724	0.852805	-0.867164	0.163915	0.95835	-0.935274	-1.31732	0.35053	-0.902189	0.778373	1.1704
Aradu.S4UH1	0.248075	-1.3931	-0.941072	0.22285	0.344237	0.607086	0.261611	0.446834	-0.990044	0.26728	-0.464551	0.422059
Aradu.S581X	0.782582	-0.893171	-0.986405	0.859541	0.884444	-0.167805	0.625852	-0.329797	-0.706125	0.673073	-0.569635	-0.910598
Aradu.S59W5	1.30123	-0.612848	-0.731535	1.42364	0.725466	-0.623491	0.394182	-0.283781	-0.692122	0.665195	-0.20842	-1.31429
Aradu.S5GH4	0.628922	1.85128	1.21782	0.219895	0.205439	0.19257	-1.26359	-0.484924	-0.229671	-0.814158	-0.498081	-0.340638
Aradu.S5QJR	-0.485437	0.228367	0.366224	-0.134745	-1.2422	-0.137104	-0.298813	-0.390128	0.686173	-0.384767	0.735862	0.62049
Aradu.S6D22	0.181677	0.810798	-0.131788	-0.0593742	-0.890635	-1.18809	0.836739	-0.23513	0.310499	0.247083	0.440555	0.371056
Aradu.S6DQM	0.0710825	-0.61794	-0.680848	0.855104	0.956752	0.465845	0.443965	-0.463844	-0.697747	0.244073	-0.520483	-0.322596
Aradu.S788A	0.848447	-0.618277	-1.72566	0.876193	0.992199	-0.0459075	0.380458	0.553417	-0.753574	0.533849	-0.281133	-0.920663
Aradu.S7D0B	-0.241269	0.00543362	-0.359702	-0.357981	0.670297	1.09942	-0.221001	-0.912619	-0.614885	-0.505144	0.593654	0.8505
Aradu.S7TZT	1.11184	-0.651065	-0.731233	0.694133	1.65051	-0.0496716	-0.494476	-0.572388	-0.676069	-0.167749	-0.554261	-0.634035
Aradu.S8BZ9	-0.133099	1.20791	0.673561	0.136848	-0.599027	0.213865	-1.0213	-1.00593	0.783697	-0.523791	0.219509	0.861747
Aradu.S8SSM	-0.661901	1.37042	0.453915	-0.709369	-0.814324	-0.921665	0.983821	0.625277	0.233661	-0.0552467	0.0785335	0.187168
Aradu.S8UGC	-0.327149	1.40808	0.983795	-0.161291	-0.403706	-0.519379	0.412948	-0.461881	0.285702	-0.359791	0.121662	-0.119617
Aradu.S8XWY	0.544723	-1.11875	-1.05016	1.18309	0.646414	-0.265101	1.139	-0.502732	-0.925974	0.952103	-0.388918	-0.464904
Aradu.S94GV	0.182577	-1.19773	-1.16812	-0.0659852	0.845583	-0.19738	-0.270547	0.521729	-0.201238	0.0437523	-0.0530418	-0.386229
Aradu.SAQ03	0.366748	-0.896869	-0.798348	1.01568	1.44197	0.11809	0.19335	-0.767412	-0.809078	0.551908	-0.447078	-0.548909
Aradu.SB62Q	1.2099	-0.392772	-1.05848	1.28519	1.13486	-0.197963	0.0841919	0.0167425	-0.855692	0.423246	-0.518608	-1.18713
Aradu.SC96N	-0.651896	1.75467	1.30237	-0.223815	-0.463046	0.318276	-0.472482	-0.435016	0.197784	-0.407531	-0.354842	-0.0272227
Aradu.SCA2Z	1.09678	-0.573243	-1.31576	1.00078	1.11446	-0.373403	-0.0940441	0.489717	-0.0245201	0.197927	-0.396361	-0.611933
Aradu.SCT5J	-0.157447	-0.296216	0.844948	0.29343	0.501308	0.622033	-0.468248	-0.568845	-0.887886	-0.10697	-0.525123	0.740483
Aradu.SD45B	0.683885	0.138653	-0.696648	0.627595	0.765367	-0.476462	-0.471947	1.23789	-0.709449	-0.288891	-0.381785	-1.00242
Aradu.SDH93	0.998409	-0.612176	-0.986428	1.32595	0.817498	-0.125113	0.269581	0.384042	-0.767645	0.584938	-0.0345304	-1.50588
Aradu.SGK85	0.935048	-1.21479	-1.18631	0.748874	1.05065	0.207919	0.519721	-0.0366744	-0.596368	0.512161	-0.291157	-0.909659
Aradu.SGL0J	1.38826	-0.637701	-0.889467	0.795403	0.791049	0.209169	0.119914	-0.0762966	-0.657	0.495941	-0.475195	-0.949485
Aradu.SGS2E	-0.189531	1.47775	0.31773	-0.0755081	-0.0838253	-0.839661	0.423483	-0.188806	0.205307	-0.0735493	0.164177	-0.23939
Aradu.SH1N1	0.418466	-0.225118	-0.555742	0.805658	0.738971	-0.787808	0.061937	0.632797	-0.721882	0.779634	-0.406733	-0.520312
Aradu.SH2RS	-1.03502	-0.251211	0.955108	-0.777635	-0.902511	0.53382	0.155373	0.0698801	0.730152	0.292261	0.0688252	0.202213
Aradu.SH92J	-0.856164	1.22691	0.902523	-0.803213	-0.840208	-0.809374	0.419051	0.163768	0.74637	0.0302652	0.42417	0.197583
Aradu.SI0S1	-0.228663	0.956438	1.05315	-0.535954	-0.832606	-0.0886042	0.128838	0.225463	0.0943856	-0.548401	0.601559	0.774063
Aradu.SIR9R	-0.291574	1.15123	-0.0246657	-0.090078	-0.497914	-0.956332	0.134281	-0.102548	0.867279	-0.316609	0.459667	0.238996
Aradu.SJ7I8	-0.355914	1.02909	1.21698	-0.0971471	-0.651268	-0.68831	0.0102736	-0.0559673	0.347253	-0.301477	0.165511	-0.515221
Aradu.SJK47	1.40947	-0.661838	-1.18087	1.00729	0.956081	-0.299365	0.29727	0.00467619	-0.53592	0.649675	-0.518104	-1.15302
Aradu.SM8C1	-0.342602	0.752531	1.49767	-0.665615	0.0141372	0.920659	-1.12563	-1.21321	-0.0385544	-0.921335	-0.0243949	1.02247
Aradu.SMR94	0.512921	-0.714035	-0.85258	0.798702	1.12364	0.550729	0.0757516	-0.272126	-0.925066	0.484083	-0.760963	-1.11228
Aradu.SN12S	0.155526	0.930785	0.529876	0.801493	-0.673737	-1.03701	0.313523	-0.178593	0.564287	0.0880071	-0.225281	0.0264651
Aradu.SP1K3	1.32906	0.0715514	-0.286	1.24066	1.04282	-0.575693	-0.0893881	-0.00613566	-0.72061	0.225345	-0.915477	-1.21816
Aradu.SP99D	-0.617861	1.02707	-0.0519409	-0.0655013	-0.652532	-0.197334	0.625489	-0.451432	0.420908	0.16773	0.377013	0.765808
Aradu.SSI7D	-0.180994	1.5197	1.02701	-0.23109	-0.768503	-0.484363	0.402909	0.216485	0.262079	-0.508623	0.0135977	-0.187554
Aradu.STM8E	0.242886	1.13842	0.378981	-0.760222	-0.90771	0.188023	-0.826006	0.159086	0.552023	-0.714113	0.360579	0.778835
Aradu.SV14W	-0.104664	0.588557	0.302724	-0.261795	0.266273	0.0198773	-0.976042	0.285102	-0.0774571	0.164929	0.343173	-0.0352132
Aradu.SW45G	0.492931	-0.641663	-0.793958	1.06891	1.22288	-0.252732	-0.661029	0.423718	-0.511208	0.517759	-0.542417	-0.854815
Aradu.SZ07F	0.93413	-0.816178	-1.29353	1.2442	1.06947	-0.125041	0.0899848	-0.137892	-0.947421	0.530292	-0.394265	-0.732134
Aradu.SZ91T	1.0243	-0.637329	-1.19257	0.903113	1.09959	0.372429	0.317781	-0.342993	-0.581997	0.449093	-0.374116	-1.15774
Aradu.T02A4	-0.603265	1.32371	0.173067	-0.826068	-0.78311	-0.594378	0.245845	0.0503637	0.794928	-0.312637	0.539224	0.482805
Aradu.T09Z3	0.640856	0.360515	-0.547374	0.0634857	0.833338	0.60196	-0.285432	-1.17193	-1.11685	-0.482243	0.328838	0.575026
Aradu.T0KCG	1.31324	-0.482832	-0.593638	1.5818	0.739436	-0.590794	0.127029	-0.292774	-0.471066	0.627377	-0.647934	-1.34421
Aradu.T0VC2	0.0910274	1.56429	0.75589	-0.0676824	-0.770983	-0.315156	0.110438	-0.23641	0.421544	-0.0554643	-0.232048	-0.057706
Aradu.T0YTZ	-0.469081	1.0411	0.565104	-0.376237	-0.715991	-0.763921	0.367569	0.0914419	0.284466	-0.221459	0.306922	0.203107
Aradu.T12XR	0.821829	-0.829546	-0.915926	1.1031	1.29049	0.00104275	0.00375654	-0.449473	-0.823972	0.533343	-0.608787	-0.771515
Aradu.T19XF	-0.836225	1.43177	0.896907	-0.907279	-0.508704	-0.818169	-0.119363	0.435445	0.75476	-0.382733	0.0611743	0.0773341
Aradu.T1HSP	-0.163435	1.37416	1.47209	-0.3951	-0.922818	-0.453892	-0.140499	-0.0557484	0.210315	-0.50078	-0.00640694	0.0137814
Aradu.T2RWK	1.29177	-0.447766	-0.444407	-0.0764358	0.778178	-0.0050349	-0.0771794	0.442655	-0.3336	-0.18191	-0.631372	0.0500729
Aradu.T2SCC	1.23558	-0.265215	-1.14325	0.876847	1.105	-0.45656	0.861497	0.510781	-1.04205	0.289607	-0.400469	-1.47114
Aradu.T3PXW	0.534077	-0.998641	-1.7034	1.00932	0.972763	0.281707	0.465293	0.115392	-0.766542	0.621369	-0.200452	-0.574142
Aradu.T3YRR	0.84943	1.47009	0.698094	0.343739	-0.334469	0.113491	-0.381531	-0.417345	-0.615101	-0.740923	-0.197753	-0.755979
Aradu.T42JA	-0.00526452	0.25127	0.167183	0.168096	-0.658624	0.0275799	-0.00779022	-1.12062	-0.0624315	0.122561	0.75289	-0.125287
Aradu.T4R26	1.01116	-0.616493	-0.73134	1.14738	0.181112	-0.496599	0.681119	-0.601025	-0.253281	1.11665	-1.00492	-0.271519
Aradu.T50NW	-0.931281	0.570637	1.06449	-0.819095	-0.994628	-0.456691	0.293668	0.112912	1.32024	-0.407841	0.30792	0.157848
Aradu.T5EDJ	-0.0802407	-0.395994	-0.000480922	0.9223	-0.232683	0.0755818	0.725629	-1.2787	-0.03347	0.408375	0.303073	-1.02252
Aradu.T5NFD	1.13368	-0.252056	-1.34379	1.4379	1.01007	-0.301477	0.262162	0.0541838	-0.735305	0.48085	-0.474723	-1.01111
Aradu.T5QCT	-0.105288	1.08653	0.929325	-0.469015	-0.650746	-0.410023	-0.0670417	-0.24497	0.512266	-0.407384	0.2713	-0.241134
Aradu.T63JX	1.50734	-0.16572	-0.16572	-0.16572	-0.16572	-0.16572	-0.16572	-0.16572	-0.16572	-0.16572	0.986394	-0.16572
Aradu.T65KX	1.03032	-0.824979	-1.39841	1.08174	0.923396	-0.213904	0.43127	0.472754	-0.603762	0.606388	-0.600057	-0.776205
Aradu.T720W	0.491967	0.0808096	0.0479161	0.587838	0.0397954	1.09232	-0.479928	-1.44695	-0.801304	-0.417511	-0.0760705	1.05556
Aradu.T7J8U	-0.181349	1.86408	1.01429	0.223747	-0.553105	-0.352364	0.196531	-0.706886	0.205981	-0.378364	-0.194336	0.0584852
Aradu.T7MUN	0.756126	0.26546	-0.559616	0.401858	-0.00374634	-0.549167	0.823591	-0.996375	-0.341926	0.461808	0.467656	-0.246968
Aradu.T82KB	0.0430411	1.03893	1.00435	-0.111656	-0.823389	-0.157955	-0.178168	-0.533162	0.78552	-0.790808	0.0911809	0.263081
Aradu.T8B3G	1.14056	-0.950642	-0.63536	1.39873	0.944663	-0.362994	-0.2614	0.0703637	-0.544772	0.488224	-0.320341	-1.09932
Aradu.T8LHC	1.1586	-0.412358	-1.7988	0.904242	0.776993	-0.457625	0.503308	0.550299	-0.151475	0.58318	-0.124775	-1.4133
Aradu.T8NA8	-0.0279978	1.6109	1.13958	-0.240256	-0.452793	-0.440633	-0.586556	0.220433	0.313203	-1.04758	0.467826	0.0389342
Aradu.T8SW7	1.14274	-0.906157	-1.15853	1.01422	1.30947	0.219601	-0.00255922	-0.19881	-0.920313	0.256355	-0.392389	-0.724873
Aradu.T9JQ9	0.979476	0.711259	-0.499002	0.124482	-0.263036	-0.0152109	0.364317	-0.134138	-0.0802377	0.708261	0.0572493	-0.117402
Aradu.TA4YU	0.852671	-0.710205	-1.19574	1.06509	0.930471	-0.123975	0.0771529	-0.307093	-0.217043	0.831068	-0.643562	-1.27431
Aradu.TA6QE	-0.683332	1.21341	1.44908	-0.547386	-0.787066	-0.913948	0.283695	-0.0305021	0.735577	-0.50397	-0.0644747	0.574357
Aradu.TC40J	1.3652	-0.490267	-0.81306	1.22271	1.10499	-0.160744	0.311075	-0.113065	-1.00333	0.473425	-0.54107	-1.28022
Aradu.TDW2C	-0.875543	1.63351	0.153033	-0.503853	-0.750446	-0.532625	-0.41941	0.705362	0.0273004	0.396882	0.465791	0.21825
Aradu.TED1R	0.211811	-0.525454	-1.24837	-0.466207	0.91388	1.12468	-0.120396	1.11275	-0.472862	-0.086098	0.185332	-0.364647
Aradu.TG3XC	1.39846	-0.28834	-1.10439	1.0758	0.656393	-0.355091	-0.109609	0.646575	-0.284464	0.114818	-0.593624	-0.730448
Aradu.TH1E7	-0.193328	-0.112677	0.327214	0.201621	-0.10135	1.22812	-0.308	-1.26518	-0.298292	-0.202228	0.501457	0.543692
Aradu.TH5IF	-0.313473	1.19817	1.20322	0.0559513	-0.33531	-0.161167	0.10197	-1.1162	0.183035	-0.18088	0.187052	-0.451731
Aradu.THV7P	-0.465101	0.557783	1.7698	-0.101327	-0.886659	-0.206689	0.190394	-0.746996	-0.152098	-0.00785472	-0.00514262	-0.139786
Aradu.TIH7T	-0.748405	0.676739	0.422315	-0.775236	-0.0684859	0.978492	-0.486297	-1.05865	-0.20423	-0.578046	0.640859	1.15037
Aradu.TJ219	0.390801	-0.705011	-1.11221	0.462292	0.65971	-0.654196	0.803893	0.801878	-0.950323	1.01675	-0.269536	-0.790127
Aradu.TJ7VE	0.799518	-0.905289	-0.905289	1.19887	1.07312	0.139819	0.175092	-0.622187	-0.834276	0.675859	-0.681317	-0.730924
Aradu.TJL9X	0.277104	-0.600176	-0.657105	0.39733	0.715511	-0.0743158	0.723639	-0.49603	-0.410573	0.665143	-0.43608	-0.436436
Aradu.TL55R	-0.281616	1.14224	1.38075	-0.125768	-0.384749	-0.0155001	-0.476917	-0.674839	-0.325541	-0.458593	0.250548	0.464065
Aradu.TL8H2	-0.00245188	-0.325708	0.0792671	-0.634105	0.0297352	0.55108	0.400795	-1.3741	-0.210602	0.113615	0.62454	0.842668
Aradu.TP87H	-0.577413	0.14468	0.442058	-0.51688	-0.811371	0.770978	0.201042	-0.497777	0.47632	-0.0696795	0.820438	0.237505
Aradu.TPB4V	-0.836329	1.19591	1.09757	-0.911955	-1.01998	-0.477886	0.307127	0.324994	0.82689	-0.321922	0.332944	0.469337
Aradu.TPI8X	0.0986376	0.206735	-0.663129	0.171795	-0.0559974	0.36982	-0.209282	-1.21017	-0.251285	-0.128862	0.302697	1.16956
Aradu.TRF59	0.828935	-0.595944	-0.595944	1.16679	1.22096	-0.189745	-0.560842	-0.550025	-0.595944	0.524865	-0.538947	-0.495093
Aradu.TWP4N	0.282384	-0.483862	-0.703749	0.52349	0.618052	-0.275743	0.932858	0.00560415	-0.47531	0.868733	-0.639409	-0.755507
Aradu.TWU0S	-0.399814	-0.368023	-0.441501	-0.50622	0.0462111	0.455281	-0.275396	-0.597997	-0.583838	-0.224155	0.572985	2.00481
Aradu.TY2KJ	0.561721	1.13686	0.368898	0.353563	0.276981	0.0573548	0.416974	-0.890425	-0.588975	-0.79311	-0.369162	-0.183702
Aradu.U01Y5	-0.255783	1.40685	0.664862	0.409397	-0.366634	-0.734257	0.329396	-0.386387	0.1647	0.0658659	-0.170635	-0.0293864
Aradu.U0ER6	-0.746345	1.50235	1.03808	-1.2627	-1.43451	0.529318	0.0330431	0.350025	0.0256818	-0.234921	0.249129	0.715546
Aradu.U0VN4	-0.282698	1.14422	1.01356	-0.649921	-0.826206	-0.281152	-0.164202	-0.163692	0.172536	-0.459575	0.493534	0.523611
Aradu.U1S9C	-0.895661	1.28011	1.16719	-0.143669	-0.366517	0.331648	-0.851367	-0.876155	-0.273689	-0.341238	0.135001	1.03856
Aradu.U1XFT	-0.176946	0.926784	0.824801	-0.304871	-0.343373	0.510117	-0.652195	-0.411587	-0.194826	-0.655217	0.28109	-0.0341746
Aradu.U21Z6	0.970303	-0.0771301	-1.29648	1.37147	0.966785	-0.565525	0.069165	0.0522113	-0.556711	0.740428	-0.322122	-1.37243
Aradu.U22U9	-0.137159	0.622796	1.2028	-0.360337	0.436206	0.223699	-0.172418	-0.737339	-0.150391	-0.782765	0.377483	0.343147
Aradu.U2I8E	-0.166195	0.502887	0.4892	-0.054469	-0.892813	0.22826	0.745078	-0.922497	0.217076	0.100782	0.162018	-0.0314346
Aradu.U2R98	0.207908	0.331711	-0.668572	0.173	0.506496	-0.87026	-0.0959831	1.12065	-0.336253	0.340195	-0.154932	-0.656182
Aradu.U2UEV	0.233981	1.35122	0.660208	0.701332	-0.680121	-0.745066	0.0438794	0.101215	0.401551	-0.46457	-0.220633	-0.293392
Aradu.U2USZ	0.91507	-0.438669	-0.557669	1.10497	1.23323	0.0180227	-0.1692	-0.510355	-0.870766	0.210746	-0.741451	-0.909426
Aradu.U2YMJ	-0.894907	0.648355	0.515836	-1.14655	-0.925255	-0.767219	0.454241	0.265431	0.74039	-0.0438525	0.72895	0.083206
Aradu.U3CMB	1.1548	-0.872454	-0.532984	0.815289	0.386933	-0.561219	0.206141	0.595826	-0.543972	0.154004	0.15191	-1.00679
Aradu.U481X	0.990003	-1.23792	-0.848772	1.28787	0.941826	-0.596855	0.172679	0.222796	-0.369613	0.369813	0.0676828	-0.6778
Aradu.U590Q	-0.268258	0.377146	-0.717815	-0.959191	-0.346003	0.313337	0.117556	-0.217314	0.660104	-0.255168	0.944116	0.553941
Aradu.U5BRX	1.2993	-0.412438	-0.893565	1.52851	0.682798	-0.481285	0.326851	-0.0718783	-0.814996	0.581595	-0.684431	-1.0145
Aradu.U5CVT	0.94587	0.795358	0.0690879	0.77498	-0.0384215	-0.375305	0.106627	-0.975351	-0.0333069	0.407169	-0.0560853	-1.06385
Aradu.U5F9L	-0.497216	1.0637	0.435279	-0.986082	-0.946376	-0.702294	0.0874149	0.805414	0.96749	-0.353767	0.441159	0.0140988
Aradu.U61TW	-0.403488	0.57081	0.597142	-0.491517	0.015072	0.501859	0.019615	-1.09214	-0.454556	-0.415877	0.571174	0.268927
Aradu.U64PV	1.23829	-0.510572	-1.29893	1.36379	0.951432	-0.107127	0.19331	-0.0848763	-0.852947	0.720547	-0.429059	-1.0013
Aradu.U66TG	0.485677	0.878223	0.749387	0.882665	-0.529772	-0.891687	0.551896	-0.801413	-0.0369982	0.106631	-0.362018	0.0535827
Aradu.U6GZH	-0.359039	0.54601	0.605802	-0.7418	-0.87214	-0.685807	0.788893	0.0604685	0.421675	0.00343469	0.480569	-0.328527
Aradu.U6V8H	-0.276038	1.1763	0.982149	-0.54453	-0.349613	-0.297525	-0.287728	0.236478	0.590497	-0.268857	0.0848201	-0.0837872
Aradu.U7EBV	1.50894	-0.638194	-0.888164	1.48044	1.0336	-0.316612	0.213337	-0.138653	-0.927227	0.46438	-0.502347	-0.98286
Aradu.U7FRB	0.219097	1.14096	0.340112	0.233778	-0.330721	-0.29217	0.477726	-0.143872	-0.0612349	-0.0820661	0.0364858	-0.264008
Aradu.U7I0T	1.20552	-0.748063	-1.59008	1.29706	0.672749	-0.357189	0.812627	0.0672997	-0.784917	0.584966	-0.359601	-0.94893
Aradu.U7S88	1.02184	-0.548373	-1.32213	0.723538	1.2447	-0.0507353	0.358256	0.439463	-1.05435	0.501305	-0.542515	-0.811144
Aradu.U7X01	0.932299	-0.142441	-1.2236	0.90678	0.703783	-0.739487	0.150655	0.979487	-0.385513	0.703069	-0.440488	-1.07838
Aradu.U885W	-0.508976	-0.265658	-0.179197	-0.103196	-0.341858	0.0462745	1.10001	-0.893854	0.508502	0.0858289	0.849326	0.199995
Aradu.U8ALB	0.486372	0.606561	0.487181	0.941718	-0.414686	-0.929447	-0.312486	-0.275912	0.414385	-0.190963	0.000316323	-0.133228
Aradu.U9IPR	-0.778824	1.09862	1.06533	-0.811084	-0.909172	-0.551172	-0.133642	0.345403	0.923309	-0.345501	0.337841	0.512713
Aradu.UA393	0.933374	-0.631278	-1.70316	0.454622	0.577735	-0.179821	0.263162	0.898618	-0.536738	0.385566	-0.122207	-0.911651
Aradu.UB9SW	-0.237031	0.877774	1.19777	-0.718512	-0.594878	-0.611157	0.694223	-0.219959	0.441104	-0.278626	0.146867	-0.21239
Aradu.UCK5W	-0.841155	1.26922	1.14413	-0.809877	-0.70262	-0.488535	0.546576	-0.58185	0.567083	-0.280684	0.488029	0.774652
Aradu.UFS53	-0.719512	0.956641	1.36999	-0.494562	-0.541028	0.520027	-0.618402	-0.475514	-0.0280956	-0.492569	0.00634274	0.328311
Aradu.UGC9M	0.211639	-1.07287	-0.66298	1.43149	0.595779	-0.694724	0.723765	-0.514516	-0.810405	1.10389	-0.332424	-0.97887
Aradu.UGD4H	-1.36294	0.244247	1.8	-0.572922	-0.885216	0.175044	-0.139515	-0.506249	1.32441	-0.490482	0.12226	0.177754
Aradu.UH7I0	0.548111	0.734303	-0.458595	0.311999	1.37353	0.189624	-0.133102	0.723448	-0.204669	0.0191379	-1.07512	-0.549855
Aradu.UI4QX	-0.332538	1.67705	0.609846	-0.467232	-0.553289	-0.574523	0.254735	0.530924	0.0767443	-0.477901	0.0975991	0.238146
Aradu.UL3VI	-0.343036	0.549757	0.307613	-0.0909208	-0.396093	-0.666667	0.207914	-0.575344	1.07788	0.463404	0.235021	-0.466893
Aradu.UL8XP	0.957626	-1.08782	-0.919226	0.982118	0.781811	-0.141808	0.968807	-0.889706	-0.705032	0.580289	-0.567958	-0.488099
Aradu.UM1Y9	-0.100654	-1.21676	-1.23386	-0.15492	0.714085	-0.355837	0.755117	0.467378	-0.157192	0.927174	-0.0710318	-0.35211
Aradu.UM7TW	-0.0486321	-0.143148	-1.67534	0.816045	-0.1092	0.356655	0.880301	-1.20691	-0.140506	0.298249	0.383399	0.900513
Aradu.UN245	-0.111974	1.17762	0.48819	0.614184	-0.379008	0.0634967	-0.441832	-1.19763	-0.0975496	-0.115759	-0.126094	-0.010582
Aradu.UNB9U	0.780255	-0.536117	-0.536117	1.3232	1.9671	-0.536117	-0.406701	-0.187776	-0.536117	-0.536117	-0.318495	-0.536117
Aradu.UP9E4	1.00345	-1.0621	-0.828176	1.45173	0.239027	0.437477	0.0480697	-0.276562	-0.741814	-0.0410016	-0.461481	0.32434
Aradu.UQ2CM	0.990052	-0.864741	-0.461386	1.00568	1.10253	-0.555318	0.0302974	-0.437655	-0.718339	0.241764	-0.686839	-0.568846
Aradu.UR1K0	1.33647	-0.687717	-1.0155	1.62971	1.04032	-0.275819	-0.129994	-0.281705	-0.700591	0.473402	-0.538385	-1.03301
Aradu.URD4R	0.659861	-1.08322	-1.51451	0.759494	0.831814	0.321144	0.086125	-0.207937	-0.675628	0.572728	-0.0616896	-0.494579
Aradu.US8PG	1.55799	-0.781091	-0.736177	1.26756	1.22244	-0.32541	-0.0370604	-0.215788	-0.794088	0.395084	-0.717124	-0.6936
Aradu.US90Q	0.268027	1.5394	1.82083	-0.161392	0.353272	0.368687	-0.357386	-0.729508	-0.854898	-0.65383	-0.440959	-0.943812
Aradu.UXN6T	-1.0104	-0.209147	0.331017	-0.5994	0.157801	0.989942	-0.763272	-1.40293	0.491052	-0.437275	0.772001	1.09694
Aradu.UY2MQ	1.27352	-0.67136	-1.40152	1.33548	0.876868	-0.179999	0.51804	-0.150579	-0.896202	0.659455	-0.345326	-0.953723
Aradu.UY6CA	-0.682852	0.265536	0.439767	-0.536087	-0.232766	0.492018	-0.0384117	-1.04343	-0.461144	-0.289871	0.430403	0.89155
Aradu.UYR4V	-0.898534	0.896678	0.802519	-0.597026	-0.951319	-0.447651	0.17617	0.279377	0.92701	0.193912	0.0763678	0.569553
Aradu.UYZ93	0.710548	-1.30962	-1.27129	0.512234	0.989915	0.616597	-0.0622261	0.0409549	-0.803302	0.660737	0.427442	-0.319741
Aradu.UZ3UX	1.21671	-0.627496	-1.18656	1.06286	1.11276	0.0505817	0.313589	-0.376756	-0.896724	0.256259	-0.468381	-1.11877
Aradu.V04CP	-0.429804	1.19359	0.646981	-0.621931	-0.593932	-0.712296	0.128628	0.408653	0.153248	-0.019325	0.29127	0.00924813
Aradu.V060T	-0.430932	0.682937	0.457161	-0.330873	-0.533638	0.00797733	0.478305	-0.837353	0.119361	0.109902	0.544875	0.0567884
Aradu.V0CGL	0.13887	0.934568	0.0418343	-0.121183	0.841595	1.01071	-1.10515	-1.24017	-0.501645	-0.750709	0.365972	0.582466
Aradu.V0G6T	-0.239534	0.882683	1.23933	-0.7034	-0.905421	-0.41562	-0.281405	0.0301389	0.929625	-0.409978	0.0325335	0.809318
Aradu.V0UIC	-0.78838	1.00957	0.716085	-0.928614	-1.29185	-0.30393	-0.0205373	-0.306165	1.13174	-0.0798258	0.3411	0.969265
Aradu.V1BNU	0.814417	-0.0849286	-0.659378	0.618217	1.04776	-0.222607	0.0684234	0.087707	-0.816005	0.0102125	-0.61212	-1.29769
Aradu.V1JTR	-0.643723	1.13731	-0.199319	-0.521799	-1.14319	-0.701508	0.618387	0.653644	0.500759	0.320834	0.253905	0.342687
Aradu.V20DR	0.152109	-0.0407894	-0.256638	-0.0811972	0.647162	1.10094	-0.92665	-1.07059	-0.497726	-0.443033	0.48276	0.744848
Aradu.V24GR	-0.309631	-0.0775581	-0.120267	-0.581091	0.898926	1.38042	-0.72839	-0.914484	-0.658302	-0.46614	0.34951	1.09358
Aradu.V2WS8	0.512401	-0.183508	-1.34582	0.963704	0.902142	0.00723658	0.0555005	0.690623	-0.821851	0.406704	-0.780692	-0.919038
Aradu.V33RZ	0.0157677	1.70676	0.54971	0.155025	-0.809967	-0.801615	-0.10565	-0.288418	0.473653	0.0366978	-0.0594657	0.261149
Aradu.V37F6	0.489082	-1.11179	-1.21471	0.990535	0.526403	0.832942	0.145323	-0.0144476	-0.611125	0.688208	-0.144367	-0.84354
Aradu.V3F8H	1.29613	-0.468449	-0.797082	1.39066	0.934235	-0.300756	0.0495086	-0.210569	-1.0184	0.471163	-0.236687	-1.14641
Aradu.V3I9N	0.187156	1.04663	-0.440717	0.112739	0.874645	0.916154	-0.302255	-1.47548	-0.638502	-0.504431	-0.279867	0.743326
Aradu.V3PH3	0.56618	-0.383207	-1.61054	0.285536	1.12843	0.250475	0.6149	0.0581895	-0.263955	0.371233	-0.102806	-0.892523
Aradu.V40FE	-1.09067	1.40983	1.37484	-0.941205	-1.01861	-0.0746141	0.0172978	0.0498866	0.491365	-0.462061	0.22209	0.555195
Aradu.V4JPN	-0.160478	1.04072	-0.435655	-0.335817	-0.0786299	-0.431234	0.633287	-0.909299	0.841154	-0.349514	0.563188	0.686939
Aradu.V4L4B	1.09978	-0.442563	-1.0793	0.687848	1.79557	0.000330833	0.158088	-0.158024	-0.342878	-0.0722702	-0.601031	-0.915962
Aradu.V4M1G	-0.620568	1.18744	0.864375	-1.06859	-0.705753	-0.93818	0.127183	0.541743	0.590964	-0.180248	0.302856	0.0100955
Aradu.V4VHC	1.23986	-0.615708	-1.13273	1.32982	0.888437	-0.533921	0.652593	0.0755792	-0.737727	0.572612	-0.46647	-1.18081
Aradu.V5LSS	0.488663	-0.709066	-0.882433	0.231931	1.28524	0.262957	-0.375093	0.269591	-0.965469	0.158456	-0.841981	0.111685
Aradu.V5NSB	1.01972	-1.13912	-1.22443	1.23583	0.878632	0.137	-0.0893879	-0.458367	-0.82931	0.747387	-0.641854	-0.470692
Aradu.V5SB4	-0.5254	1.02163	1.04517	-1.13089	-0.753234	-0.673948	0.0236323	0.556073	0.598769	-0.473662	0.262886	0.586221
Aradu.V62QB	0.00148418	0.451722	0.422441	-0.865375	-0.910641	-0.527029	-0.113709	-0.413039	0.690637	-0.0957021	0.267576	0.553342
Aradu.V66GG	1.0219	-0.236271	-1.05704	1.20209	0.882614	-0.341635	0.189025	0.414087	-0.287561	0.637579	-0.629903	-1.21979
Aradu.V6QFH	-0.269081	-0.0339009	0.53751	-0.048795	-0.17123	0.808842	0.192097	-0.987059	0.170512	-0.795345	0.323401	0.340645
Aradu.V6UC8	0.781532	-0.570098	-0.488637	1.24053	1.11921	0.666194	0.162549	-0.826148	-0.792417	-0.000693332	-1.0223	-0.851239
Aradu.V6VEV	0.103516	0.147912	-0.157679	-0.194083	0.451793	1.3692	-0.682708	-1.07792	-0.720065	-0.653811	0.261295	0.953647
Aradu.V7DVH	1.48015	-0.656085	-0.503909	1.82861	1.15854	-0.206664	-0.515564	-0.473586	-0.807518	-0.182475	-0.742406	-0.807518
Aradu.V7M4B	0.524737	0.51836	-0.00834314	0.472301	0.625517	1.3709	-0.413823	-1.52774	-0.914169	-0.807022	0.3834	0.430272
Aradu.V7PE8	-0.3051	1.29451	0.410657	-0.821944	-0.750993	-0.625669	0.00926649	0.529999	0.720848	-0.185664	0.165282	0.375168
Aradu.V7YK4	0.77277	-0.883117	-0.683042	1.02917	1.183	-0.192598	-0.670117	0.278947	-0.872353	0.0959139	-0.469124	-1.08679
Aradu.V7ZLW	1.11223	-0.523562	-1.15903	0.267246	0.883836	-0.455638	0.0216602	0.75499	-0.714132	0.444433	-0.339442	-0.598186
Aradu.V81ZJ	-0.652654	1.29194	0.708138	-0.40818	-0.665076	0.0809707	-0.446156	0.469186	0.464833	-0.717757	0.40832	-0.0206479
Aradu.V8E28	-0.343471	0.886217	-0.0310911	0.0214074	0.241189	0.136899	-0.138844	-1.26009	-0.423113	0.47215	0.663416	0.268801
Aradu.V8F3D	0.973683	-0.287203	-0.380453	0.705757	1.20279	-0.413616	-0.479089	-0.0674578	-0.52942	0.0851794	-0.535172	-1.16878
Aradu.V8FCP	-0.744679	1.78197	0.99734	-0.829082	-0.713743	-0.331627	0.191344	0.142606	0.517048	-0.560384	0.288202	0.601661
Aradu.V9EPJ	0.855553	0.256185	-0.0737733	0.305924	1.22509	0.285125	-0.822544	0.507766	-0.993252	-0.342132	-0.526034	-1.01359
Aradu.V9MVJ	0.958978	-0.851428	-0.668854	0.973616	0.610323	-0.532808	1.01007	-0.389041	-0.553227	0.61111	-0.658735	-0.839644
Aradu.V9V3G	0.610997	0.319663	0.585693	0.550586	-0.921878	-0.411378	0.28962	-0.154444	-0.0301843	0.4641	0.152788	-0.707366
Aradu.VAJ1Y	0.128433	-0.392463	-0.488604	0.161591	1.09735	-0.00327944	-0.461042	0.894294	-0.976563	0.282997	-0.122804	-0.916791
Aradu.VAW6K	1.15582	-0.467346	-0.928992	0.678488	0.262088	-0.250008	-0.0381344	0.335655	-0.549046	0.690174	-0.498393	-0.799386
Aradu.VB4H3	0.407096	1.45341	-0.0664995	0.389354	-0.235014	-0.16185	0.0501531	-0.237858	-0.138836	-0.313424	0.118269	1.05001
Aradu.VBS2W	-0.674668	1.18082	1.05517	-0.773321	-0.776809	-0.616735	-0.322855	-0.107824	0.967951	-0.475237	0.454932	0.788585
Aradu.VCB0A	-0.599641	0.707737	-0.101774	-0.401062	-0.762845	-1.16216	0.534775	0.264878	1.01589	0.369174	0.498706	-0.00264218
Aradu.VD77L	0.447479	-1.14844	-1.08365	0.440701	0.796169	0.05844	0.416853	-0.360411	-0.689013	0.725887	-0.308201	-0.336199
Aradu.VF3QV	-0.489913	0.584901	-0.201488	-0.130671	-0.206157	0.0101616	0.358255	-0.792008	0.33765	0.164427	0.519395	0.514457
Aradu.VFN3G	0.911987	-1.0419	-1.0721	0.816044	1.0392	-0.216232	0.708102	-0.533557	-0.709767	1.19686	-0.553468	-0.832321
Aradu.VHN7G	-0.340526	0.865805	1.32626	-0.0244409	-0.966349	-0.510252	0.240437	-0.543486	0.580277	-0.406274	0.0239164	0.229758
Aradu.VI8FD	0.0480318	-0.120587	-0.534078	-0.00629862	0.969159	1.07611	-0.795087	-0.964392	-0.836423	-0.277319	0.288391	0.975436
Aradu.VK63J	1.22971	-0.853468	-1.44876	1.24854	0.916194	-0.127372	0.423241	-0.0696368	-0.779378	0.501583	-0.322611	-0.828996
Aradu.VK984	0.121136	0.969409	0.160278	-0.0245221	-0.58386	-1.23591	0.984405	-0.636569	-0.0359137	0.281542	-0.227897	0.439476
Aradu.VKM3T	1.07213	-0.223155	-0.969177	1.09961	1.11579	-0.237983	0.0427185	0.541459	-0.902573	0.410612	-0.433644	-1.16604
Aradu.VKT6C	-0.744978	1.19369	0.907367	-1.25353	-0.511068	-0.584743	-0.175657	0.565088	0.822643	-0.437086	0.482737	0.0980183
Aradu.VKW7H	0.901377	-0.728831	-0.692246	1.9046	0.96278	0.0507707	-0.337826	-0.64871	-0.513574	0.17256	-0.656648	-0.632727
Aradu.VL3IZ	-0.377415	0.201749	-0.457227	-0.541751	0.627147	0.915184	-0.660895	-0.742362	-0.534674	-0.351859	0.483009	1.31637
Aradu.VM6CH	1.12527	-0.870081	-0.870081	1.18591	1.14316	-0.0690688	-0.304143	-0.537795	-0.665148	0.92026	-0.55638	-0.870081
Aradu.VM8XK	-0.513316	0.0827863	-0.458053	-0.0904802	0.668025	0.673326	-0.516723	-0.872404	-0.170409	-0.0387727	0.861283	-0.325158
Aradu.VM94P	-0.49392	0.673803	1.14528	-0.270192	-0.54282	-0.517666	-0.105519	-0.438119	0.421525	-0.406797	0.32517	0.366535
Aradu.VN8X3	0.962068	-0.828677	-1.03719	1.52794	0.932397	-0.225574	0.456729	0.180473	-0.943273	0.474191	-0.50732	-1.2057
Aradu.VP2SQ	1.15668	-0.147152	-0.750262	2.27663	0.824328	-0.524197	-0.222492	-0.286463	-0.658561	-0.0836857	-0.898289	-0.853626
Aradu.VPR7N	0.184182	0.733338	-0.213844	0.392087	-0.7044	-0.258394	0.278468	-0.400329	-0.00817511	0.149871	0.591732	-0.244886
Aradu.VQ1N9	-0.959425	0.975299	0.848549	-0.572752	-1.0727	0.0150797	0.385178	0.342734	0.524238	-0.206254	0.357732	-0.0364697
Aradu.VRH2C	-0.324649	1.49668	0.937924	0.0244338	-0.474347	-0.555194	-0.31381	-0.0465686	0.139382	-0.421123	-0.194801	0.527591
Aradu.VU1J9	-0.768088	1.0176	0.964835	-1.25723	-0.828889	-0.85703	0.111155	0.552578	0.871452	-0.420262	0.312796	0.696092
Aradu.VUQ4V	0.807654	-1.09526	-1.32008	1.29267	0.789974	0.0585765	0.781462	-0.557288	-0.794038	0.700708	-0.388522	-0.915077
Aradu.VV3RK	-0.178754	1.06453	0.549291	0.0368127	0.196279	0.958337	-1.1593	-0.977933	-0.149322	-1.01683	0.00149286	0.678398
Aradu.VV8YW	-0.708203	1.0995	1.13688	-0.803806	-0.977707	0.106977	-0.63424	-0.132544	1.40114	-0.410435	0.361866	0.0584212
Aradu.VW3L1	0.49305	-0.242813	-0.0753346	-0.486044	-0.568306	0.654283	0.11515	-0.229833	0.544181	-0.666235	0.125916	0.657466
Aradu.VWQ48	-0.188989	0.811513	0.969121	-0.523431	-1.12389	-0.507622	-0.287123	0.953634	0.341973	-0.18285	0.345465	0.0514917
Aradu.VWW03	-0.783866	1.23805	0.34352	-0.874933	-1.09427	-0.943938	0.605999	0.674607	0.825831	0.270443	0.184597	0.0640255
Aradu.VX1BY	0.40304	-1.05661	-0.74355	0.119443	1.20297	-0.0959408	-0.114192	0.28831	-0.143094	0.565361	-0.425976	-0.905512
Aradu.VX49E	-0.272742	1.20943	1.16622	-0.395751	-1.15556	-1.05586	0.379616	0.137085	0.58198	-0.224907	0.232607	0.177697
Aradu.VXK5T	-0.953025	0.128829	0.0405408	-0.654823	-1.30834	-0.528655	1.08081	0.0326749	0.836426	0.557184	0.569085	0.218893
Aradu.VXN4X	1.82641	0.420797	-0.157772	-0.315104	0.355342	0.458405	0.0997481	0.355234	-0.553684	-0.553684	-0.553684	-0.00325727
Aradu.VY4AY	-0.650675	0.300347	-0.768965	-0.375427	-0.662267	-0.20549	0.716151	-0.397141	0.699563	0.171483	0.703264	0.394262
Aradu.VY6JK	-0.461892	-0.141439	-0.507132	-0.322539	0.90607	1.04902	-0.29837	-0.870212	-0.659209	-0.299794	0.490307	1.00593
Aradu.VYZ0J	-0.0241079	-0.934582	-1.07987	0.203426	0.785904	0.640745	-0.123068	0.630065	-0.9228	0.561047	-0.372691	0.0309471
Aradu.VZ7S5	0.715727	1.07935	1.03017	1.02393	-0.0222481	-0.0758708	0.149622	-0.69257	-0.646838	-0.191126	-0.468956	-0.841939
Aradu.VZN92	1.43005	-0.500286	-0.586884	0.339956	1.14232	0.246797	0.540678	0.183721	-1.21643	-0.0968776	-0.855327	-0.20112
Aradu.VZQ8X	1.10694	-0.342982	-0.977491	0.915834	0.923343	-0.0496943	0.239984	-0.247217	-0.951902	0.450638	-0.577862	-0.888673
Aradu.W07KG	-0.35914	1.46885	1.41183	-0.411735	-0.773088	0.271234	-0.532544	-0.317904	0.133665	-0.512151	-0.193174	0.574698
Aradu.W0P9E	-0.500445	1.04351	0.965908	0.0209713	-0.808539	-0.175785	0.104387	-0.953538	0.817143	-0.206414	0.128566	0.325304
Aradu.W2Y55	0.878512	-0.699568	-0.952335	1.5018	1.04435	-0.191874	-0.00634437	-0.125088	-0.839396	0.502055	-0.486211	-0.20936
Aradu.W3KLG	0.524614	-0.312858	-0.721478	0.836895	1.24317	0.0454638	0.182354	0.302535	-0.503608	0.300473	-0.587228	-1.108
Aradu.W4282	1.06057	-0.665649	-1.37094	0.848501	0.7198	0.106362	0.0828568	0.470368	-0.900931	0.665439	-0.383984	-1.01686
Aradu.W4N8R	1.02097	-0.0881473	-0.574269	0.872919	0.891584	-0.310539	0.337064	0.280144	-0.918788	0.45333	-0.767128	-1.10725
Aradu.W50S7	0.29419	1.4293	1.09174	0.308198	-0.364309	-0.987701	-0.196239	-0.128483	-0.267323	-0.088499	-0.0789312	0.0950997
Aradu.W5C9S	0.0822265	-0.594608	-0.569245	-0.0378668	0.868655	0.226084	-0.0772066	-0.16976	-0.214012	0.443402	-0.378335	-0.434772
Aradu.W5INW	1.77084	-0.800805	-0.910277	1.14668	0.823375	-0.430377	-0.0145674	0.0902671	-0.775297	0.454323	-0.56029	-0.488309
Aradu.W5WIK	-0.510805	0.74082	1.05839	-0.662635	-0.978935	-0.491761	-0.384289	0.500056	0.422901	-0.521445	0.203224	0.543439
Aradu.W639R	0.368028	1.46717	-1.40541	0.0188611	-0.0398767	0.103553	0.225172	-0.198528	-0.443422	0.200427	0.377439	0.17391
Aradu.W7HY5	-0.552854	1.3286	0.222684	-0.858787	-0.349449	-0.434796	0.40939	-0.137888	0.726793	-0.279147	0.534079	-0.0385494
Aradu.W7KRJ	-0.381131	0.502084	0.942311	0.685679	-0.0113653	-0.352441	-0.998135	-1.23909	0.815497	-0.479314	-0.0723091	0.183223
Aradu.W80F3	1.325	-0.0937866	-0.258738	1.55599	1.5252	0.473178	-0.775939	-0.891416	-0.719398	-0.70155	-0.901741	-0.856471
Aradu.W818I	-1.10496	0.758707	0.686443	-0.641836	-0.895409	-0.232612	0.726536	0.255712	0.767175	-0.271302	0.347506	0.335184
Aradu.W81PL	1.19275	-0.345214	-0.963676	1.35437	0.937708	-0.467219	0.330995	0.114136	-0.558888	0.635774	-0.693684	-1.10114
Aradu.W87GJ	0.553365	-0.629089	-0.891313	1.08713	1.1541	0.0616506	0.277793	-0.422804	-1.19722	0.361471	-0.282548	-0.31245
Aradu.W8JHF	-0.893939	1.30278	1.37275	-0.413025	-0.760779	-0.199798	-0.1873	-0.41413	0.827493	-0.266054	0.00755832	0.866375
Aradu.W8K8D	0.981248	-0.413826	-0.639984	0.78509	0.522874	-1.00565	0.306787	0.652977	-0.552417	0.686948	-0.781767	-1.22248
Aradu.W8MA0	-0.81635	0.701823	-0.285037	-1.05495	-0.85256	-0.839521	0.580334	0.537977	0.777057	0.437194	0.681429	0.352948
Aradu.W9CXN	-0.872879	1.23392	1.21808	-0.881238	-0.879483	-0.0480477	-0.307197	-0.244103	0.667618	-0.465829	0.280114	1.2221
Aradu.WA7XQ	1.35696	-0.196493	-0.717912	1.15085	1.06292	-0.168425	-0.266222	-0.550838	-0.746076	0.315165	-0.813936	-0.721229
Aradu.WAV5L	-1.03199	0.850399	1.03829	-0.61119	-1.13207	-0.241319	0.73386	-0.279269	0.699927	0.206875	0.234287	0.609585
Aradu.WB15T	-0.596574	0.818013	0.409795	-1.41974	-0.813499	-0.195064	0.778058	0.176788	0.805621	-0.210428	0.552666	0.454174
Aradu.WB5VJ	1.29826	-0.377052	-0.993256	1.15019	1.07041	-0.515144	-0.0161982	-0.233409	-1.08387	0.707585	-0.72404	-0.70784
Aradu.WB9GS	-0.503654	0.730407	-0.698359	-0.256557	-0.224856	-0.111745	-0.216087	-0.70341	-0.416328	0.15421	0.656944	1.0001
Aradu.WBJ0E	0.336186	-0.967536	-1.48472	0.937904	0.710149	0.0597097	0.69203	-0.0856937	-0.455658	0.890939	-0.376251	-0.773059
Aradu.WBK0P	0.215261	0.820906	0.0872402	0.643701	-0.728764	-1.34088	0.378546	0.0125847	0.808561	0.222403	0.166813	-0.194408
Aradu.WBM86	1.64788	-0.245316	-0.904487	1.01465	1.28082	0.0104709	-0.178861	-0.171249	-0.981202	-0.268911	-0.721093	-0.981202
Aradu.WD9Q5	-0.48732	0.725625	0.207737	-0.207752	-0.247557	0.425228	-0.499863	-0.895007	-0.408383	-0.276665	0.679198	1.00102
Aradu.WDX5A	0.726369	-0.198281	-0.787489	0.984292	0.677626	-0.47007	1.2213	0.741628	-1.11961	0.248442	-0.569727	-1.07513
Aradu.WF2VJ	0.185123	0.0417631	-0.90569	-0.106036	0.668367	-0.550438	0.0231964	0.147282	0.00661821	0.654931	0.22456	-0.476896
Aradu.WF6XH	0.539099	-0.708252	-0.784551	1.12409	0.949314	0.0651547	0.828144	-0.316539	-1.01683	0.439231	-0.480198	-1.07891
Aradu.WGI6P	1.04946	-0.662795	-1.13141	0.790604	0.784776	0.0466242	0.48433	0.615601	-1.11748	0.0506511	-0.219764	-1.3962
Aradu.WH0UE	0.775861	-0.54428	-1.00953	0.928396	1.12125	-0.416532	0.25691	0.612968	-0.627083	0.119608	-0.177165	-0.818647
Aradu.WH8HR	-0.587662	0.900516	1.0963	-0.958344	-0.681172	-0.453343	-0.058037	0.161225	1.09102	-0.611353	0.191104	0.764878
Aradu.WIS3J	-1.17697	0.231145	1.85693	-1.00104	-0.935874	0.286398	0.111247	0.0695188	-0.0470038	-0.124477	0.331662	0.270206
Aradu.WJU1S	-0.20646	-1.03846	-0.419247	-0.287408	0.933557	1.19324	-0.49045	-0.0939056	-0.903042	0.0241768	0.508333	0.485935
Aradu.WLU86	-0.868695	0.77668	0.41899	-0.786732	-1.16928	-0.495888	0.30168	0.194419	0.917744	0.00381407	0.509238	0.548154
Aradu.WM3WA	-0.0281158	0.969819	0.429583	-0.157735	-0.512148	-0.420517	-0.370557	-0.691495	-0.798348	0.124284	0.353016	1.24641
Aradu.WMG0K	0.310693	-0.840692	-0.497573	0.311649	0.6703	1.21558	-0.322379	0.00339374	-0.702868	-0.233131	-0.363942	0.205596
Aradu.WMI8X	0.23535	0.727466	0.590385	0.081382	-0.506371	-0.448689	0.445367	-0.264198	0.169929	0.429364	0.202091	-0.835619
Aradu.WNQ8E	-0.18427	0.566506	0.791689	0.335122	-0.668312	-0.32809	0.317348	-0.740519	0.241313	0.055814	0.0773079	-0.397121
Aradu.WNZ6N	-0.910195	0.964566	0.000764162	-0.42156	-0.499299	-0.130995	-0.0458723	-0.230301	-0.0280738	-0.0229761	0.5947	0.836781
Aradu.WRK9I	-0.662331	1.15592	0.872171	-0.715522	-0.891776	-0.782498	0.426212	0.521572	0.680315	-0.194828	0.361545	0.187752
Aradu.WS4W4	1.05047	-0.310709	-1.08915	0.902807	1.50991	-0.52486	0.115889	0.274182	-1.10246	0.225118	-0.387207	-0.980069
Aradu.WSW8I	1.22515	-0.434846	-1.1707	1.57487	0.928427	-0.399491	0.20683	-0.0669845	-0.752329	0.722642	-0.578164	-0.741037
Aradu.WU1XZ	1.61108	-0.0515333	-0.774645	1.5137	1.1956	-0.0531797	-0.119848	-0.54452	-0.853257	0.0699821	-0.832565	-1.00242
Aradu.WW54U	-0.438311	1.33453	0.891115	-0.223409	-0.668698	-0.845645	-0.149524	0.20899	0.514516	-0.307431	0.153274	0.271492
Aradu.WX32R	-0.608365	0.191533	1.12367	-0.140465	-0.0182527	0.789598	0.0533734	-1.39549	-0.746486	-0.66767	0.45342	0.687733
Aradu.WZ0Y8	1.24038	0.570366	-0.980773	0.689686	-0.405394	-0.494116	1.0674	-0.780672	-0.145696	0.321142	-0.0645998	-0.631838
Aradu.WZ2TS	-0.801273	1.08203	0.75288	-0.650316	-0.606319	0.328638	0.326336	-0.424476	-0.397343	-0.664576	0.546044	0.675925
Aradu.X0HV2	-0.17919	1.75715	0.840884	-0.71332	-0.751157	-0.558121	0.0888255	0.590497	-0.396175	0.0560668	0.0569364	0.170734
Aradu.X1031	-1.0478	-0.175127	0.193694	-0.676377	-0.325391	0.805734	-0.042936	-1.1645	0.12132	-0.290956	0.854268	1.41924
Aradu.X16AU	-0.677841	1.72898	1.14876	-0.265683	-0.734386	-0.415289	-0.135388	0.174437	-0.154486	-0.435091	0.0834606	0.2312
Aradu.X1MQ8	1.01555	-1.2888	-1.40776	0.347177	1.17632	-0.0268311	0.305421	0.496223	-0.609465	0.428424	-0.424681	-0.402766
Aradu.X1TYZ	1.46126	-0.837694	-0.837694	0.964223	0.968261	-0.495419	0.563387	-0.260499	-0.479347	0.715218	-0.685959	-0.547624
Aradu.X1W4U	-0.600761	0.168863	-0.138019	-0.42754	-1.07016	0.433339	0.429429	-0.628216	0.469231	-0.0977152	0.268266	1.46424
Aradu.X1Y61	0.123418	-0.651878	-1.15387	0.730917	0.895169	0.10183	0.188861	-0.152935	-0.264576	0.778609	-0.619182	-0.287312
Aradu.X2DEV	0.825847	-0.675883	-0.71175	1.26212	0.89642	-0.316867	-0.160739	-0.287909	-0.652863	0.81491	-0.185638	-1.03686
Aradu.X2X3M	1.33229	-0.532435	-1.25147	0.920854	1.05224	-0.445224	0.198429	0.33783	-0.569954	0.508662	-0.503954	-1.09257
Aradu.X30I1	0.464155	-0.359723	-1.03877	0.819669	0.9241	-0.330855	0.868856	0.0187285	-0.453921	0.814488	-0.725627	-0.807739
Aradu.X3CG0	1.70776	0.0453662	-0.556564	1.38037	0.982261	-0.499801	-0.49584	-0.191446	-0.785322	-0.40254	-0.790011	-0.808347
Aradu.X3MXA	-0.373749	1.48467	1.70639	-0.456007	-0.775135	0.449515	-0.527543	-0.509472	-0.148182	-0.633893	-0.171202	-0.491706
Aradu.X4DG3	0.938904	-1.06958	-1.31729	1.08524	0.960272	0.0685044	0.3348	-0.0846658	-0.773139	0.396994	-0.373225	-0.900657
Aradu.X4GW8	0.932389	0.183835	-1.59863	1.07215	0.854896	-0.066739	-0.216156	0.677722	-0.50999	0.639286	-0.711909	-0.838781
Aradu.X4Z63	-0.747821	0.54975	-0.28394	-0.825865	0.267184	0.947452	-0.207103	-1.26226	-0.398914	-0.607255	0.736421	1.18279
Aradu.X5JF5	1.34727	0.457391	-0.879189	1.50084	1.0366	-0.492955	-0.141222	0.109942	-0.831061	0.244326	-0.845078	-1.12773
Aradu.X5ND8	-0.577578	0.367209	0.198682	-0.541734	-0.362392	0.750184	-0.404488	-1.23714	0.0402676	-0.560829	0.681851	0.999322
Aradu.X6FMF	-1.07709	1.2462	0.623208	-1.29386	-0.97453	-0.569633	0.493064	0.383366	0.551933	-0.107128	0.49672	1.24016
Aradu.X6MU8	-0.425152	1.47553	0.136871	-0.288414	0.11698	0.53862	-0.364752	-0.395208	-0.212045	-1.02221	0.418361	1.17226
Aradu.X6VZP	0.351891	1.25637	-0.832567	0.245706	-0.284385	-1.34734	0.444826	-0.416602	0.456978	-0.225619	-0.0678167	0.282977
Aradu.X6XVS	-0.642552	0.909001	-0.297863	-0.161977	-0.407511	-0.0279474	0.103898	0.372737	0.810936	-0.579856	0.595514	0.396705
Aradu.X7J20	0.977549	-0.765645	-0.991672	1.17738	0.797863	-0.407563	0.664114	-0.394562	-0.714006	0.856494	-0.698832	-1.08345
Aradu.X7TZK	0.00963872	0.33276	-0.589724	-0.18829	0.253679	1.14521	-0.503736	-1.35913	0.0853468	-0.0464878	0.659287	0.905614
Aradu.X7VPA	0.997476	-1.10793	-0.507207	1.36322	0.995925	-0.418783	0.207099	-0.123506	-0.0442057	0.377535	-0.556943	-1.08386
Aradu.X8BV5	-0.285839	1.02123	0.312123	-0.581301	-1.04561	0.0535609	0.276212	-0.601649	0.505066	0.325802	0.540331	0.307545
Aradu.X8E8R	1.18728	-0.462474	-1.20931	1.25901	0.817233	-0.422639	0.401	0.498998	-0.790416	0.797889	-0.272232	-1.36343
Aradu.X8MF9	-0.414323	0.324706	0.321686	-0.080721	0.297609	1.19463	-0.137845	-1.66328	-0.429217	-0.575496	0.613441	0.727935
Aradu.X9T6W	0.976227	-0.736174	-1.36724	1.32017	0.915567	0.0357031	0.344254	0.0632087	-0.827621	0.514612	-0.674261	-0.869403
Aradu.XA20N	0.885886	-0.419361	-0.793654	1.23718	0.848624	-0.442403	0.270179	0.513226	-0.903714	0.541463	-0.861545	-0.65802
Aradu.XA5F9	-0.496744	0.688812	0.588205	-0.66704	0.260028	1.17162	-0.689723	-0.966073	-0.616608	-0.71514	0.496526	1.08288
Aradu.XH0YF	1.30183	-0.461395	-1.11347	1.39555	0.956964	-0.554622	0.234994	-0.0224969	-0.799697	0.666547	-0.49996	-1.07399
Aradu.XJX4Z	-0.229273	0.116748	-0.691855	-0.23325	-0.391065	-0.509653	1.3862	-0.409655	0.00837379	0.651764	0.513942	0.563882
Aradu.XL48U	1.23883	-0.792502	-1.40243	1.46009	0.735462	-0.186228	0.57752	-0.1957	-0.721741	0.776118	-0.636038	-0.988373
Aradu.XL9EY	0.161222	0.0456091	-1.10572	1.07899	1.2527	0.44504	0.0360915	0.147347	-0.631151	0.191441	-0.851508	-1.04544
Aradu.XM9I6	-0.716772	1.06821	0.724231	-0.586603	-0.712734	1.31939	-0.399757	-0.845114	0.107699	-0.868598	0.0516615	1.50743
Aradu.XN7XU	-0.0493806	-1.18292	-1.15165	0.499234	0.352618	-0.00788476	0.319956	0.064958	-0.618776	0.851868	-0.349019	-0.155967
Aradu.XNA23	-0.513823	1.34657	0.136378	-0.146188	-0.279675	-1.18243	0.293075	0.159763	0.663867	-0.133327	0.451511	0.323397
Aradu.XNJ7A	-0.0894885	0.178258	0.0744933	-0.0960388	0.535285	1.42756	-0.959426	-1.17939	-0.552286	-0.739821	0.324417	1.02379
Aradu.XPZ1I	1.12487	-0.126198	-0.804978	1.03838	1.16078	-0.276668	0.00187226	-0.245808	-0.841152	0.592606	-0.841588	-0.899119
Aradu.XS87U	1.03053	-0.62617	-1.44757	0.826807	1.18589	-0.110574	0.742694	0.334064	-0.891595	0.0847174	-0.18486	-0.983967
Aradu.XUE97	0.474426	0.446003	0.642131	-0.625309	-0.346248	-0.379586	0.579326	-0.0561891	0.335077	-0.0902976	0.368708	-0.443708
Aradu.XVQ80	0.108645	-0.488238	-0.488238	0.509396	0.847044	1.25648	-0.317641	-0.305034	-0.388227	-0.278067	-0.488238	-0.249723
Aradu.XVU7P	-0.821228	0.858393	1.05944	-0.870877	-1.15958	-0.717837	0.141955	0.0626017	0.924759	-0.0911499	0.234434	0.711653
Aradu.XWA25	-0.36922	1.22215	0.838949	-0.324044	-0.904298	-0.608048	-0.0809014	-0.166769	0.824474	-0.751531	0.185448	0.697891
Aradu.XWZ7Z	0.217252	1.63954	0.881196	0.317863	-0.611475	-0.428859	0.0133535	-0.00742102	0.274646	-0.831357	-0.276971	-0.31842
Aradu.XX5Y6	0.896466	-0.766935	-0.934603	0.555505	0.549699	-0.432936	-0.373847	0.36923	-0.611842	0.385928	-0.288726	-0.806661
Aradu.XX9XI	1.33051	-0.727411	-1.02162	1.62635	1.1143	-0.462666	0.161983	-0.406482	-0.830252	0.513891	-0.614502	-0.974707
Aradu.Y0N9I	0.283117	1.12207	1.16991	-0.51954	-0.772554	-0.0735846	-0.570622	0.373453	0.607599	-0.674613	0.282302	0.244251
Aradu.Y12MD	0.746047	-0.924349	-0.956132	0.946106	0.675136	0.00813965	0.502723	-0.00941203	-0.670952	0.416105	-0.726736	-0.775678
Aradu.Y1LT0	-1.05855	0.880438	0.687768	-1.03899	-0.994432	-0.508798	0.691438	0.36457	0.746058	-0.0657473	0.403591	0.493638
Aradu.Y1RGP	1.06298	-0.791102	-0.56136	1.69546	0.933855	-0.42975	-0.159755	-0.36289	-0.479679	0.29939	-0.741405	-0.843096
Aradu.Y1Z8I	-0.700474	-0.0379762	-1.09265	-0.0775505	0.0925297	0.910167	0.213429	-0.885854	-0.231591	0.356095	0.467608	0.752251
Aradu.Y27NY	1.61428	0.127807	-0.403177	1.5709	1.32868	0.38165	-0.504852	-0.67251	-1.12185	-0.301323	-0.864197	-1.0008
Aradu.Y2IEM	0.562427	-0.843831	-0.76509	1.1959	0.566862	0.0886403	0.346164	0.101857	-0.685515	0.224119	-0.534752	-1.02386
Aradu.Y31BQ	0.989325	-0.499013	-0.431126	1.39998	0.45442	-0.452766	0.020126	-0.219898	-0.799112	0.493964	-0.766712	-0.721432
Aradu.Y4AIA	-0.419083	-0.195172	-0.610411	-0.309069	0.512787	0.878345	0.628673	-0.883665	-0.294434	0.65514	-0.338125	0.0253918
Aradu.Y4TRH	-0.117851	-0.117851	-0.117851	-0.117851	-0.117851	-0.117851	-0.117851	-0.117851	1.29636	-0.117851	-0.117851	-0.117851
Aradu.Y5G1G	-0.854051	0.727796	1.00047	-0.214496	-1.20183	0.462014	-0.158519	-1.00214	0.785374	-0.183782	0.429021	0.602295
Aradu.Y5NIC	0.0885958	-0.439027	-0.601538	-0.0909442	1.05446	-0.139768	-0.712051	0.710201	-0.250709	0.195033	-0.433734	-0.310362
Aradu.Y6VDH	0.432694	-0.0457437	-0.514292	0.821888	0.0279826	0.175453	0.473845	-1.00746	-0.358452	0.450988	0.378965	-0.397489
Aradu.Y6WCA	-0.122873	0.890645	0.346889	-0.204667	-0.776263	-0.648609	0.492988	0.29259	0.558187	-0.364254	0.248368	-0.380499
Aradu.Y6X63	0.0900386	1.52489	1.12228	-0.17554	0.257852	0.404469	0.173839	-0.623772	-1.20183	-0.431836	0.0780135	0.0998014
Aradu.Y7AUY	-0.172145	0.463151	0.43092	-0.183987	-0.805805	-0.746054	0.401736	-0.154774	0.398738	-0.178004	0.285363	0.554503
Aradu.Y7C7J	-0.725384	0.83275	0.757691	-0.898479	-1.12432	-1.01239	0.213137	0.508051	0.710302	-0.0558668	0.0969845	0.626099
Aradu.Y8JER	-0.212492	0.591565	-0.00502765	-0.840189	-0.991272	-0.764063	0.2851	0.50528	0.687748	0.12793	1.05271	0.428359
Aradu.Y8X8A	0.327193	0.670144	0.658708	0.179507	0.00212009	0.197476	-0.053892	-0.435963	-0.324006	-0.64426	0.279589	-0.185579
Aradu.Y97H0	-0.694405	0.454637	1.48054	-0.743606	-0.82981	0.184108	-0.542553	-0.929085	0.937333	-0.57906	0.296869	0.488086
Aradu.Y9EKK	1.37869	0.08947	-0.483873	0.525763	1.62288	0.723541	-0.199586	-0.502645	-1.00783	-0.271752	-0.697537	-1.17989
Aradu.Y9QIK	1.22514	-0.797426	-1.04994	1.19901	1.37497	-0.176838	0.0528602	-0.279528	-0.911299	0.169044	-0.481139	-0.524293
Aradu.YA6PI	-1.03103	0.409354	0.533498	-0.167394	-0.796251	-0.791455	-0.213828	-0.30288	0.96077	0.717454	0.0403743	0.178486
Aradu.YC0F1	0.990101	-0.853473	-0.97248	0.355595	1.0849	-0.186273	-0.0124306	0.533156	-0.280272	0.34794	-0.461587	-1.03652
Aradu.YCH6P	0.236164	1.149	1.3214	-0.0160536	-0.65271	-0.936532	-0.198349	-0.494492	0.458383	-0.0616069	-0.0449598	-0.109399
Aradu.YCI2Q	-0.0646139	0.959652	0.956776	0.368916	-0.904702	-0.544388	-0.169729	-0.3504	0.83229	-0.255924	-0.184702	-0.229738
Aradu.YGS80	-0.0476701	0.380284	-0.0232507	-0.837152	-0.999112	-1.10498	0.216089	0.604466	0.640267	0.184786	0.664601	0.614129
Aradu.YH413	-0.631179	0.874288	0.737966	-0.855539	-1.23463	-0.254535	0.432577	0.218208	0.769929	-0.0113861	0.441942	0.477191
Aradu.YL9QE	-0.927023	0.440424	0.246961	-1.52735	-0.779704	0.482314	0.265281	-0.191224	0.756736	-0.266926	1.002	1.03216
Aradu.YMT2S	0.710321	-1.48143	-1.21566	0.809686	0.791067	-0.262753	0.200722	0.152387	-0.357239	0.732088	0.168881	-0.758868
Aradu.YN1Y7	0.693327	-0.631283	-0.675099	0.820447	0.791782	-0.56319	0.83833	-0.346284	-0.604279	0.832223	-0.510047	-0.766887
Aradu.YN681	0.403009	-1.3944	-1.15424	0.738227	0.836987	0.456794	0.0573042	-0.612873	-0.712386	0.491677	0.154002	-0.391692
Aradu.YQ24Z	0.19088	-1.24495	-1.00717	0.158504	1.03774	0.444451	0.128381	-0.00224943	-0.685988	0.247256	-0.19901	-0.400712
Aradu.YQ9IH	0.909713	-0.254106	-1.40967	0.746814	0.722821	-0.819968	0.628679	0.641048	-0.217344	0.591095	-0.102839	-1.46919
Aradu.YRC2R	-1.2075	0.598097	0.326031	-0.561298	-0.62887	-0.0720164	0.015092	-0.107297	0.690496	-0.119662	0.930225	0.178665
Aradu.YTL0F	-0.573711	1.03498	1.14764	-1.12774	-0.790957	-0.774538	0.0590713	0.273393	0.698407	-0.284016	0.298116	0.19252
Aradu.YU6QF	-0.631715	0.868914	0.214908	-0.909905	-1.00235	-0.356088	-0.219511	-0.156634	1.33271	-0.387055	0.632256	0.611677
Aradu.YUC18	-0.214691	1.0762	0.818272	0.100542	-0.858891	-1.1245	-0.0524266	0.206766	0.241142	-0.152624	0.242569	0.150387
Aradu.YUY1S	-0.981262	1.5077	0.742169	-0.490354	-0.752879	-0.0686285	0.175846	-0.0831667	0.36358	-0.218716	-0.0507916	0.706553
Aradu.YV75B	-0.702237	0.168848	-0.51859	-0.22089	-0.223664	0.340997	-0.322738	-1.27763	0.0742696	-0.0428472	0.886557	1.74806
Aradu.YXZ49	0.0989272	0.282046	-0.0632673	-0.13971	-0.566272	-0.411882	0.551928	-0.199321	-0.205	0.17636	0.531835	-0.0398598
Aradu.YZ2KU	-0.881739	1.44055	1.26273	-1.20396	-0.772766	-0.202964	-0.277579	0.403477	0.639649	-0.430523	0.122612	0.518584
Aradu.YZ3FV	0.849435	-0.44787	-1.18775	0.723613	1.03499	-0.94054	0.0546613	1.00009	-0.432333	0.401847	-0.426953	-0.848329
Aradu.Z030H	-0.678148	1.26749	1.41881	-0.65242	-0.809729	-0.201487	-0.279235	-0.42076	1.04447	-0.788709	0.262661	0.772876
Aradu.Z0DSX	-0.484531	1.10896	0.185517	-0.507523	-0.892582	-0.496376	0.629376	-0.372494	0.56524	-0.0226127	0.5636	0.0565603
Aradu.Z0EIQ	-0.820989	0.346936	0.944482	0.21564	-0.662093	-0.310884	0.239079	-0.291897	-0.0248188	-0.418427	0.323703	1.62962
Aradu.Z0IH7	-0.960048	-0.960048	-0.894117	-0.960048	-0.960048	-0.960048	1.22678	1.20922	0.858682	1.19437	0.82611	0.537145
Aradu.Z0JID	-0.63176	1.44581	0.957777	-0.816436	-1.01127	-0.186301	-0.160407	0.302436	0.214638	-0.521136	-0.0686586	0.695185
Aradu.Z0T7N	-1.06629	0.92887	0.702811	-1.2032	-1.14496	-0.428261	-0.0306381	0.275583	1.14843	-0.235564	0.606053	0.794572
Aradu.Z13J2	0.00465406	1.15227	0.488745	0.191718	-1.12331	-1.18522	0.0808003	0.0329458	0.72735	0.141051	0.174541	-0.316586
Aradu.Z15L9	-1.07879	0.887344	1.02452	-0.605488	-1.0882	-0.423448	0.0828572	-0.0339271	0.931552	-0.355289	0.36209	0.876736
Aradu.Z194X	-1.12839	0.782493	0.767406	-0.458348	-0.398825	0.349569	-0.135711	-0.645035	-0.061522	-0.280503	0.484699	0.8067
Aradu.Z2BFK	1.01441	-0.709286	-0.996721	0.909639	0.90538	-0.197659	-0.106045	0.941231	-0.486412	0.032636	0.0664207	-1.07278
Aradu.Z2BLJ	0.885142	-0.686368	-1.21642	1.28906	0.984466	0.0956936	0.062584	-0.240436	-0.664378	0.346953	-0.576259	-0.826165
Aradu.Z2UCJ	-0.71186	1.02431	0.339702	-0.751704	-0.924903	-0.565909	0.381826	-0.23198	0.421623	-0.215282	0.272397	1.31843
Aradu.Z2Y83	1.01837	-0.59265	-0.944017	0.878523	0.850197	-0.167141	0.416491	0.575995	-1.04995	0.504084	-0.493367	-1.1791
Aradu.Z31WB	1.08002	-0.3958	-0.959188	1.07263	1.321	-0.504978	-0.176234	0.494249	-0.867963	0.242159	-0.567992	-0.927826
Aradu.Z3KTB	-0.663609	0.712675	0.577577	-1.2626	-0.859867	0.491075	-0.497817	-0.109881	0.784696	-0.81104	0.529162	0.968049
Aradu.Z3MEQ	1.22575	-0.716078	-1.0989	1.25192	1.14568	-0.0654327	-0.0164882	-0.331317	-0.648684	0.634699	-0.483464	-1.18702
Aradu.Z3YBH	0.0570828	0.843871	-0.0108331	-0.305517	-0.740582	-0.703772	0.418086	0.245571	1.10574	-0.0552628	0.127407	0.454429
Aradu.Z3Z17	-0.462205	1.48071	1.44047	-0.423929	-0.715543	-0.411701	-0.37765	-0.298533	0.798173	-0.651454	0.0079915	0.679055
Aradu.Z5F9U	-0.075527	-0.559131	-0.467413	-0.0159516	1.02651	0.164654	-0.452882	-0.283461	-0.42238	0.175514	-0.52091	-0.559131
Aradu.Z63A6	0.0546403	-0.307947	-0.565865	0.811304	0.666997	-0.186343	0.336282	0.360813	-0.789123	0.673586	-0.469353	-0.782934
Aradu.Z6652	0.00210006	-0.575313	-0.575313	0.517246	0.699497	-0.173318	1.29205	-0.239916	-0.575313	0.912373	-0.478429	-0.383861
Aradu.Z6Z82	-0.713686	1.02748	0.467188	-0.528617	-0.848785	-0.392237	-0.431647	0.00235032	0.851285	-0.527619	0.502137	0.813513
Aradu.Z753H	-0.970258	-0.497896	0.130989	-1.35749	-0.98153	-0.238392	0.627888	-0.0275117	0.0783635	0.445451	0.915831	1.35398
Aradu.Z7FDS	0.810622	-0.286049	-1.34189	0.590112	0.976206	-0.134655	0.445339	0.631281	-0.613567	0.732661	-0.341945	-1.4775
Aradu.Z7FZQ	-0.926429	-0.438767	-0.148133	-0.355685	-0.0702257	0.948025	0.217053	-1.15229	-0.130579	0.478273	0.568236	0.965469
Aradu.Z7K8X	0.915258	-0.829951	-1.13376	1.50179	0.732756	-0.62702	0.65286	-0.131719	-0.685434	0.693264	-0.546552	-0.743677
Aradu.Z7MCS	1.20601	-0.341953	-0.98958	1.49961	1.17347	-0.472914	0.0861851	-0.422071	-0.840529	0.574934	-0.843926	-0.774581
Aradu.Z7XZ9	-0.971351	1.01841	0.81748	-0.580794	-0.446827	-0.147922	0.474526	-0.996979	0.182592	0.0420044	0.388914	1.11722
Aradu.Z804L	0.975065	-0.234108	-1.10456	0.386327	0.819273	-0.70885	0.195433	0.923001	-0.498735	0.24696	-0.315342	-1.07398
Aradu.Z84W9	0.945131	-1.20761	-1.25125	1.00541	1.11208	-0.400538	0.218521	0.265313	-0.38007	0.385682	-0.064881	-1.31851
Aradu.Z88A2	-0.588252	1.25862	1.26344	-0.919536	-0.674971	-0.389712	-0.00445355	-0.198353	0.715703	-0.428569	0.288741	0.56288
Aradu.Z8BLA	-0.016104	0.461297	0.53498	-0.704226	-1.14416	-0.603658	0.399084	0.735975	0.626321	-0.0842258	0.554265	0.293258
Aradu.Z93ZE	1.33252	-1.069	-0.509464	1.2258	1.04442	-0.213337	-0.135297	-0.11251	-0.79314	0.542052	-0.361128	-1.11096
Aradu.Z9WFG	0.247513	0.235459	0.661369	0.827031	-0.758211	0.00810878	-0.0820552	-1.01754	0.207532	-0.487204	0.243624	0.438441
Aradu.ZA7KN	0.745839	-0.769487	-0.857435	1.25564	1.24299	0.153472	-0.577473	-0.265301	-0.69097	0.670973	-0.672225	-0.774142
Aradu.ZC0JY	-0.140274	0.644827	1.72583	-0.964145	-0.327273	0.61904	-0.464858	-0.870328	-0.486863	-0.718729	-0.0438318	0.522077
Aradu.ZC28Q	0.452045	0.876512	1.31586	0.16173	0.0501461	0.811792	-1.22125	-0.941146	0.430378	-0.982071	0.0568779	-0.377088
Aradu.ZC5IW	-0.163857	-1.13164	-0.974913	-0.196943	-0.292221	-0.421142	0.984016	0.361095	-0.0826436	0.800998	0.478421	-0.30926
Aradu.ZC9DU	-0.336932	-0.19379	-0.233986	-0.779886	-0.0776701	0.759152	-0.200735	-1.2235	-0.00215801	-0.456409	0.758664	1.29496
Aradu.ZCT9N	0.103242	2.63504	-0.627641	-0.193574	0.326573	-0.841596	0.174294	-0.0555443	0.191494	-0.177093	-0.0568753	-0.80306
Aradu.ZDV93	-0.265028	1.75153	0.0196712	-0.556366	-0.183046	0.279992	0.134377	-0.103457	-0.0300075	-0.465987	-0.151859	0.21756
Aradu.ZF22J	-0.684637	1.34425	0.9233	-0.706443	-0.779784	-0.610456	0.593271	0.401436	0.376621	0.116389	0.258078	-0.447924
Aradu.ZFA07	-0.505178	0.455445	1.87352	0.100677	-0.608923	-0.0354307	-0.434015	-0.54337	-0.269908	-0.561714	0.419851	-0.0177214
Aradu.ZFF24	0.0544275	-0.0246753	0.885631	0.119622	-0.772476	-0.209061	-0.340471	-0.14751	0.452048	-0.298885	0.492119	0.037031
Aradu.ZFW51	0.888522	-1.03125	-1.21963	1.15783	0.689851	0.00785845	0.625729	-0.112731	-0.900275	0.525488	-0.0860459	-1.09105
Aradu.ZG6LG	1.09342	-0.356592	-1.22248	1.30517	0.84745	-0.459071	0.748125	0.392939	-1.02034	0.754558	-0.419919	-1.01214
Aradu.ZG7G0	1.29338	-0.726691	-1.29564	1.06071	1.20471	-0.00990292	-0.0611954	-0.150862	-0.776994	0.339353	-0.310213	-0.898589
Aradu.ZGR3J	0.31974	-0.888373	-2.02581	0.825616	0.558465	-0.8491	0.486535	0.722353	0.0838703	0.475151	0.116534	0.313535
Aradu.ZJ1R6	-1.01229	0.969499	0.689738	-1.18298	0.0220896	0.562586	-0.892666	0.102111	-0.0669739	-0.870168	0.435585	1.31585
Aradu.ZJT5U	-0.520652	0.362964	1.15543	-0.714549	-0.726057	-0.329571	-0.491202	-0.218968	0.0493791	0.0280065	0.242102	0.765874
Aradu.ZKL1Q	0.441027	-0.534966	-0.534966	1.00335	1.00285	0.138687	0.00148275	0.0434527	-0.534966	0.0175437	-0.474369	-0.534966
Aradu.ZL9WR	0.353522	-0.640302	-0.269851	-0.0961769	0.98719	-0.107223	-0.49053	0.789959	-0.433728	0.206938	-0.834377	-0.798909
Aradu.ZM9CR	-0.829065	1.23767	-0.193912	-0.410777	0.15925	0.902497	-0.124006	-0.285208	0.0390612	-0.294497	0.280728	0.184855
Aradu.ZN6CN	0.103902	-1.23973	-1.32277	0.32791	1.07487	-0.0410531	0.278543	0.856958	-0.677273	0.377052	-0.125822	-0.510668
Aradu.ZPB6A	-0.767305	0.462845	-0.338885	-0.312756	-0.932758	-0.977343	-0.00967497	0.935479	0.464481	0.0586557	0.808253	0.450223
Aradu.ZR4EL	0.083905	-0.0814363	-0.161457	-0.0360956	0.785726	-0.639171	-0.569138	1.15909	-0.543985	-0.0859553	-0.456811	-0.378066
Aradu.ZR9ZC	-0.266033	0.481785	-0.177343	-0.188948	1.11743	1.14828	-1.04806	-1.0954	-0.668005	-0.656721	0.409554	1.00734
Aradu.ZS0NF	-0.0665086	0.644402	0.522592	0.550452	-0.624212	-0.966913	0.381446	-0.645789	0.733882	-0.1187	0.399863	-0.0728366
Aradu.ZS8UE	0.286075	0.14426	-0.538062	0.232045	0.621609	-0.365699	0.659666	-1.03153	-0.217617	0.0635047	0.836208	-0.0605525
Aradu.ZTH93	-0.778688	-0.0547448	0.684493	-0.628004	-1.01619	-0.235366	0.143075	-0.749969	0.713976	0.453009	0.566191	0.594528
Aradu.ZTY0U	1.11716	0.611211	0.284383	-0.081018	0.211152	-0.82447	0.417303	-0.329812	0.255495	-0.0613627	-0.165465	-0.584519
Aradu.ZUQ2N	0.954978	-0.798977	-1.08388	0.883475	1.00883	0.054574	-0.101173	-0.150064	-0.768475	0.20285	-0.451933	-0.722025
Aradu.ZV3G2	-0.814294	1.35263	0.713197	-0.69222	-1.02744	-0.08193	-0.00784898	-0.213651	0.626776	-0.616586	0.436834	1.02843
Aradu.ZV73M	1.13046	0.629021	-0.732948	0.996462	0.614665	-0.765321	-0.249285	0.737338	-0.686572	0.588293	-0.948174	-0.268401
Aradu.ZX8II	-1.1353	0.926079	1.2713	-0.997845	-0.681969	0.492608	-0.22512	-0.774199	0.299046	-0.803102	0.402544	1.31059
Aradu.ZXF4D	1.07385	1.26391	-0.737652	1.37273	-0.358888	-0.780299	0.0912546	-0.287368	0.0831562	0.0733373	-0.282736	-0.364985
Aradu.ZXR62	1.37092	-0.372413	-0.917644	1.56768	0.341482	-0.301254	0.163648	-0.71481	-0.804537	0.334155	-0.174497	-0.117302
Aradu.ZY1BM	-0.167828	1.12153	0.9362	0.261122	-0.48086	-0.678379	0.303542	-0.450137	0.247764	-0.300466	-0.216285	0.135277
Aradu.ZY6XU	0.7308	-0.699316	-1.04297	0.938164	1.30999	-0.351221	-0.130063	0.102903	-0.554321	0.116386	-0.589716	-0.995568
Aradu.ZYM67	0.209169	-0.95687	-1.04196	1.09292	1.32612	-0.289946	0.320667	-0.322133	-0.625329	0.565476	-0.458668	-0.741878
Aradu.ZZ4N0	-0.859712	1.27908	1.02408	-0.964702	-0.890312	-0.781492	0.352501	0.241519	0.868512	-0.321854	0.23625	0.352296
Aradu.ZZD2I	-0.313359	-0.396351	-0.396478	-0.179962	0.428984	1.32376	-0.422076	-1.20129	-0.346715	-0.178666	0.841072	0.624025
Araip.001P3	-0.0537369	0.114508	-1.51365	0.146362	0.511464	-0.33764	0.575713	0.545638	-0.463174	0.38086	0.116528	-0.790347
Araip.00FG1	-0.972364	0.176709	0.308744	-0.664601	-1.04578	-1.09482	0.868373	0.365276	1.1017	0.420138	0.538698	0.666541
Araip.00FQ0	0.966049	-0.923351	-1.28606	1.10611	1.0442	0.17901	0.325065	-0.0520701	-0.96744	0.517889	-0.41967	-0.752765
Araip.00GJX	-0.18893	1.10982	0.0975811	0.0798896	-0.526979	-0.455171	0.395075	-0.378655	0.497752	0.116986	0.230388	0.465026
Araip.00JXM	0.137005	0.847934	0.750327	-0.130907	-0.786445	-0.865952	0.489276	0.407744	0.487319	0.119971	0.256568	-0.908412
[truncated: 2,273 more rows]

## Sheet: DeNovoPeanut_infectionVScontrol
DE_genes	S_C_16	S_C_32	S_C_64	S_16	S_32	S_64	R_C_16	R_C_32	R_C_64	R_16	R_32	R_64
Adur10031_comp0_c0_seq1|g.6153	0.00526518	-0.0946288	-0.998282	-0.0422363	-0.153912	-0.298164	-0.152681	-0.918009	-0.207379	0.214903	0.750511	0.823676
Adur10032_comp0_c1_seq2|g.6155	-0.540711	0.215581	-0.348807	-0.141307	0.715122	0.723584	-0.463903	-0.795425	-0.675157	-0.43265	0.440698	1.62113
Adur10089_comp0_c2_seq1|g.6173	1.2024	0.124248	-0.924169	0.951157	1.32194	0.336806	-0.933363	0.30547	-1.03214	-0.22584	-0.808041	-0.11998
Adur101_comp2_c0_seq1|g.68	-0.569976	1.10308	0.621162	-0.809565	-0.688513	-0.322583	0.0355888	-0.252943	0.536452	-0.345953	0.403666	0.760041
Adur10199_comp0_c0_seq2|g.6200	1.2272	-0.517316	-0.897942	1.38769	1.01722	0.0931733	0.321073	-0.544751	-0.837424	0.439423	-0.932606	-1.02492
Adur10272_comp0_c0_seq1|g.6244	-0.816814	-0.143949	0.747143	-0.809247	-0.955113	0.850942	-0.175554	-0.6256	0.627745	-0.220457	0.617948	0.765148
Adur10293_comp0_c0_seq4|g.45012	0.394629	-1.24719	-0.932419	0.276936	0.756988	0.31439	0.292989	0.087363	-0.474825	0.633381	-0.0324364	-0.728028
Adur10320_comp4_c0_seq12|g.6270	-1.04869	1.01017	0.800765	-1.25013	-1.16595	-0.269831	0.644402	0.288106	0.949049	-0.101295	0.361131	0.464775
Adur10340_comp0_c1_seq1|g.45014	1.13029	-0.456765	-1.0023	0.64924	1.13242	-0.0862474	-0.225488	0.492062	-0.921911	0.618063	-0.47494	-0.90045
Adur10422_comp0_c0_seq1|g.6332	0.162029	-0.66599	-0.510283	0.745536	1.19129	-0.206199	0.626306	-0.51904	-0.617813	0.76234	-0.66599	-0.591076
Adur1051_comp0_c0_seq1|g.618	-0.481283	1.32307	-0.272896	-0.0683989	-0.892608	-0.532129	0.303153	-0.165199	0.764937	-0.307737	0.576723	0.00899901
Adur10513_comp0_c0_seq3|g.6371	0.820966	-0.934689	-1.19832	0.8153	0.936679	-0.0844723	0.642377	-0.24016	-0.709351	0.947497	-0.491948	-0.877665
Adur10514_comp0_c0_seq1|g.6372	1.44834	-0.355512	-0.868462	0.990697	0.728918	-0.0306794	0.232899	0.784926	-0.467216	0.649191	-0.709389	-1.56784
Adur10526_comp0_c0_seq1|g.6383	1.52102	-0.00330707	-0.868015	1.08788	0.625666	-0.242951	0.265129	0.622496	-0.583446	0.466122	-0.670166	-1.36798
Adur10531_comp0_c0_seq1|g.6390	-0.518489	1.10462	1.51222	-0.523755	-0.608008	0.277991	-0.706534	-0.341525	0.180342	-0.627736	-0.00956707	-0.110579
Adur10583_comp0_c0_seq1|g.6419	-0.564027	1.209	1.25594	-0.60698	-0.758921	-0.531982	0.0548852	-0.214586	0.749057	-0.316296	0.16746	0.596219
Adur10591_comp1_c0_seq1|g.6430	-0.264516	0.562452	0.226291	-0.0136412	-0.672107	-0.488696	0.459103	-0.116147	0.340936	0.215866	0.398635	-0.168075
Adur10602_comp1_c0_seq2|g.6436	1.14159	-0.776505	-0.976645	1.40225	0.813884	0.176565	0.73177	-0.238699	-0.738734	0.280365	-0.899108	-0.882874
Adur10622_comp0_c0_seq1|g.6453	0.630409	0.0272125	-0.695775	-0.0483215	0.737604	-1.10633	0.300781	1.52478	-0.312365	0.643616	-0.637021	-0.799077
Adur10680_comp0_c0_seq2|g.45056	-0.431534	1.23614	0.872481	-0.190218	-0.87654	-0.373784	0.156799	0.193173	0.269755	-0.537683	0.257588	0.123278
Adur10683_comp0_c0_seq1|g.45057	0.586949	-0.563756	-0.632648	0.459772	1.10388	0.333168	-0.119562	-0.497332	-0.600087	0.741653	-0.520356	-0.506798
Adur10694_comp0_c0_seq1|g.45060	0.0231268	0.150046	-0.451811	0.412288	0.190377	0.235663	-0.234931	-1.27176	-0.0750238	-0.171203	0.388901	1.53547
Adur10702_comp0_c0_seq1|g.6523	-0.181801	-0.403955	-0.765302	-0.535568	0.0399544	0.764283	0.0672528	-0.900704	-0.302658	0.0990193	1.05305	0.709433
Adur10703_comp0_c0_seq1|g.6524	-0.216203	-0.355244	-0.32448	-0.695462	0.181106	0.61671	-0.0742551	-1.0854	-0.285727	-0.00339941	0.922888	0.924034
Adur10703_comp0_c1_seq1|g.6525	-0.16054	-0.134335	-0.746354	-0.38549	0.0825201	0.558764	0.204493	-0.69271	-0.228354	-0.0324775	0.774758	0.499787
Adur10716_comp1_c0_seq2|g.6537	0.178579	1.54054	0.806351	0.266446	-0.740657	-0.037688	-0.0531882	-0.447804	0.0418954	-0.462476	0.153966	0.0344194
Adur10742_comp0_c0_seq2|g.6538	0.760789	-0.82048	-1.36874	0.69902	0.920266	0.0730546	0.382074	0.410534	-0.67653	0.703989	-0.253154	-0.665235
Adur10776_comp0_c0_seq1|g.6546	-0.22066	1.6526	1.17369	-0.249012	-0.909555	-0.712328	0.0846891	0.305967	0.899489	-0.535137	-0.187933	0.105771
Adur10815_comp0_c0_seq1|g.6570	1.19267	-0.489902	-1.17845	1.53114	0.734561	-0.409591	0.32143	-0.00738717	-0.709939	0.505588	-0.639907	-1.1028
Adur1084_comp0_c0_seq1|g.634	1.03289	-0.324807	-0.819016	0.501893	1.21889	-0.531701	-0.659837	0.573477	-0.678018	0.332399	-0.239242	-0.499943
Adur10845_comp0_c0_seq1|g.6591	0.28449	-0.768883	-0.784136	1.03827	0.672063	-0.270475	0.930666	-0.562008	-0.824704	0.883417	-0.608414	-0.424292
Adur109_comp0_c0_seq2|g.77	-0.884341	1.15065	1.14306	-0.976331	-0.953411	-0.511096	-0.190367	0.517746	0.685242	-0.559545	0.366921	0.547217
Adur10914_comp0_c0_seq1|g.6630	-0.817888	0.617025	0.793262	-0.395921	-0.169618	0.172289	0.0254749	-0.799475	-0.740201	-0.535504	0.557694	1.35414
Adur1106_comp1_c0_seq1|g.641	-1.53654	0.412153	0.795018	-1.1999	-1.03851	0.0997405	0.461607	-0.0089699	0.52336	-0.10099	0.636396	1.03665
Adur1106_comp1_c1_seq3|g.643	-1.5722	0.70264	0.828709	-1.47526	-0.811145	0.210086	0.553524	-0.157471	0.496545	-0.0559023	0.688631	0.901035
Adur11108_comp0_c0_seq1|g.6666	-0.512273	0.89033	0.617537	-0.833888	-0.969255	-0.022729	-0.27068	0.582792	0.897624	-0.492334	0.335911	0.880911
Adur11137_comp1_c0_seq1|g.6684	1.01243	-0.153482	-0.65171	1.45479	0.787792	-0.280203	0.704044	0.00189913	-1.06787	0.568661	-0.787172	-1.40172
Adur11137_comp1_c1_seq1|g.6686	1.00768	-0.308396	-0.924032	1.50254	0.871255	-0.31534	0.734613	0.0521568	-0.961674	0.592611	-0.808293	-1.1234
Adur11137_comp1_c1_seq2|g.45103	1.25817	-0.889312	-0.889312	1.29017	1.03558	-0.103574	-0.104685	-0.424049	-0.889312	0.467837	-0.54076	-0.658218
Adur11164_comp0_c0_seq1|g.6706	1.24347	-0.805597	-1.24209	1.32388	0.725139	-0.562239	0.282815	-0.293093	-0.493723	0.770441	-0.300252	-1.15696
Adur11179_comp0_c0_seq2|g.45116	0.640477	-0.574803	-0.952564	1.04575	0.682084	-0.100555	0.322916	0.234155	-0.886866	0.874327	-0.669355	-1.10191
Adur11193_comp0_c0_seq1|g.6742	0.227343	-0.620613	-0.560979	0.569581	0.902452	0.102452	-0.357231	0.00313424	-0.59252	0.640511	-0.463101	-0.620613
Adur11301_comp1_c0_seq1|g.6789	-0.75384	1.26446	0.362879	-0.887968	-0.613822	-0.257486	-0.310299	0.231072	0.867186	-0.519389	0.1052	1.27039
Adur11317_comp0_c0_seq1|g.6792	-0.0652536	1.26722	1.05963	-0.702722	-0.54852	-0.55396	-0.239038	-0.0649775	0.315636	-0.377392	0.345081	-0.344238
Adur1139_comp0_c0_seq1|g.659	-0.172021	0.856071	1.05387	0.216321	-1.01031	-0.509489	-0.0759935	-0.355852	0.827709	-0.273311	-0.090807	-0.149871
Adur11438_comp0_c0_seq1|g.45148	-0.295818	1.56944	1.02995	-0.493016	-0.535957	-0.443174	-0.797244	0.558857	0.482086	0.0873814	0.0419483	-0.677503
Adur11443_comp0_c0_seq1|g.6867	-0.763069	0.0953655	1.08884	-0.584522	-0.734462	-0.391334	0.874862	-0.333892	0.116553	0.182585	0.248291	0.208901
Adur11494_comp0_c0_seq1|g.6896	0.94045	-0.810318	-0.754433	1.30939	0.974391	-0.262261	0.00379414	-0.567749	-0.573325	0.742367	-0.451044	-0.650277
Adur11496_comp0_c0_seq1|g.6899	0.722619	-1.25059	-1.43638	0.895584	0.975817	0.0438569	0.532307	-0.00595298	-0.632378	0.614627	-0.26727	-0.834816
Adur11573_comp0_c1_seq1|g.6935	1.02732	-0.653771	-1.19098	1.11577	0.817336	-0.0509812	0.0092731	-0.11719	-0.31104	0.642515	-0.676121	-1.29068
Adur11601_comp0_c0_seq1|g.6951	0.663675	-1.17176	-1.32083	0.855127	1.24063	0.330911	0.204831	-0.307041	-0.749556	0.129314	0.243096	-0.476389
Adur1164_comp0_c0_seq4|g.689	-0.0669884	0.602314	0.140359	0.486286	-0.96255	-0.286742	0.0600132	-0.227394	0.667622	-0.114822	0.14164	-1.00886
Adur11691_comp1_c0_seq1|g.6994	0.0230671	-0.961998	-1.07849	1.20456	0.907701	0.0674925	0.859514	-0.59416	-0.649301	0.844946	-0.523107	-0.475649
Adur11729_comp1_c0_seq1|g.45178	0.426019	-0.702299	-0.621585	1.16675	0.812945	-0.628618	0.422208	-0.591822	-0.642568	1.06581	-0.6281	-0.542039
Adur11732_comp0_c0_seq2|g.7014	-1.39277	1.13358	0.457193	-0.985007	-0.989691	-0.651867	0.566324	0.453311	0.943376	0.0111094	0.303679	0.16993
Adur118_comp0_c0_seq2|g.87	0.857081	-0.385293	-1.35888	0.790913	0.968209	-0.10408	0.207947	0.499663	-0.365014	0.730953	-0.423066	-1.33369
Adur11829_comp2_c0_seq1|g.7042	1.20655	-0.497329	-1.20755	1.0515	0.897006	-0.726029	0.170274	0.655253	-0.733811	0.478264	-0.0153346	-1.2672
Adur11890_comp1_c0_seq1|g.7080	-0.0655794	1.1565	1.11556	-0.0858494	-0.697387	-0.565406	-0.01462	0.162972	0.305152	-0.418362	0.0724475	-0.452057
Adur11932_comp1_c0_seq3|g.7107	1.21321	-1.02246	-1.12565	0.401201	0.409027	0.00700639	0.440162	0.758418	-0.774003	0.601149	-0.440406	-0.656629
Adur12_comp0_c1_seq1|g.6	-0.647814	0.725796	0.631897	-0.597252	-0.441086	1.25661	-0.623253	-0.754345	0.19623	-0.657791	0.233422	0.424524
Adur120_comp0_c0_seq1|g.91	1.1879	-0.638056	-0.726919	1.22425	0.957728	-0.137091	-0.191861	0.606609	-0.92553	0.363493	-0.20427	-1.63633
Adur12023_comp1_c0_seq1|g.7176	0.576	-1.06255	-1.01933	0.745323	0.889379	-0.100011	0.621278	-0.317751	-0.536125	0.611357	-0.420667	-0.862364
Adur1209_comp0_c0_seq2|g.717	0.512982	-0.608556	-0.54468	0.653058	0.591259	0.201107	-0.0803817	-0.256279	-0.42157	0.490597	-0.736643	-0.400468
Adur12104_comp2_c0_seq6|g.7230	-0.379794	0.952116	0.0101951	-0.121093	-0.0400882	1.50559	-0.352614	-1.06321	-0.258716	-0.469052	0.21053	0.845509
Adur12105_comp0_c0_seq1|g.45228	1.38953	-0.609253	-1.30387	1.50621	0.802944	-0.19061	0.332435	-0.285383	-0.82978	0.555556	-0.360034	-0.976475
Adur12105_comp0_c0_seq2|g.7231	1.33105	-0.45974	-0.814365	1.62243	0.669564	-0.315623	0.213292	-0.0325438	-0.619686	0.548212	-0.472817	-1.26805
Adur12112_comp1_c0_seq1|g.7241	0.179053	0.222199	1.01045	0.0263821	0.542161	0.934234	-0.855275	-0.978776	-1.01916	-0.558748	-0.396037	0.956437
Adur12228_comp0_c0_seq2|g.7273	-0.484971	1.03481	1.09459	-0.583821	-1.02301	-0.37878	0.243264	0.357968	0.683659	-0.425111	0.236225	0.188106
Adur12345_comp1_c0_seq5|g.7345	-0.271008	1.09909	-0.434735	-0.0710233	-1.08666	-0.911375	0.747407	0.151442	0.663531	0.0534933	0.452065	0.363343
Adur12374_comp0_c0_seq13|g.7360	0.938926	-1.18807	-0.907476	0.381814	0.941132	0.114912	0.510433	0.111797	-0.820016	0.452775	-0.320457	-0.815284
Adur12445_comp2_c0_seq3|g.7396	0.131963	-1.76376	-1.20161	-0.210168	-0.0986554	-0.187787	1.67997	0.225685	-0.0768759	0.882679	0.334697	-0.656047
Adur1250_comp0_c0_seq1|g.44025	-0.811614	1.26906	0.889512	-0.129077	-0.486418	0.372707	-0.712663	-0.767944	-0.0715882	-0.4184	0.0325852	1.03188
Adur1253_comp0_c0_seq1|g.743	1.27904	-0.631647	-1.13053	1.03927	0.919859	-0.00224951	0.603305	0.200816	-0.724526	0.457762	-0.737276	-0.915094
Adur12541_comp0_c0_seq1|g.7463	0.937497	-0.0324749	-0.341082	0.297825	1.21827	-0.344394	-0.463209	0.756749	-0.986431	0.143478	-1.09394	-0.54921
Adur12553_comp0_c0_seq1|g.7480	0.505105	1.83207	1.26431	0.115521	0.292403	0.700315	-1.01303	-0.762692	-0.481425	-1.12145	-0.564597	-0.201609
Adur12574_comp0_c0_seq1|g.7497	0.34683	0.446432	0.248899	0.395872	0.601238	1.51581	-0.968371	-1.34431	-0.817476	-0.577126	-0.0743331	0.242029
Adur12619_comp0_c0_seq2|g.7500	-1.08052	0.842025	1.02206	-0.865664	0.0049395	1.13134	-0.56082	-0.592671	-0.186752	-0.981317	0.487245	1.2143
Adur12710_comp1_c0_seq2|g.7525	1.26375	-0.263576	-0.698707	1.77858	0.690508	-0.329	-0.621226	0.107267	-0.745849	0.00860772	-0.554159	-1.0253
Adur12712_comp0_c0_seq3|g.7527	-0.399769	0.206644	1.07245	-0.48475	-0.103024	0.932376	-0.430013	-1.29021	-0.451003	-0.622384	0.05482	1.22352
Adur12733_comp0_c0_seq1|g.7539	1.32279	-0.723245	-0.90275	1.17154	1.01678	-0.324938	-0.0298302	-0.193147	-0.841342	0.599283	-0.416658	-0.863639
Adur12854_comp0_c0_seq1|g.7581	-0.997698	0.602488	1.11195	-0.500821	-0.231508	1.10218	-0.12054	-1.05337	-0.413937	-0.580951	0.27921	1.02253
Adur12878_comp0_c0_seq2|g.7592	-0.761916	-0.249953	0.376368	-1.18312	-0.401818	0.556396	-0.982885	-0.552787	0.230147	-0.115877	0.749703	1.29101
Adur12999_comp0_c0_seq1|g.7681	-0.154786	0.727315	-0.145054	-0.175357	-0.843711	0.0347494	-0.655291	-0.0808777	0.368338	0.165487	0.546854	1.36891
Adur13141_comp1_c0_seq1|g.7764	0.871625	-0.300325	-0.666779	1.10288	0.991682	0.0765754	0.457639	-0.126597	-0.883925	0.599911	-0.864556	-0.952031
Adur13254_comp0_c0_seq1|g.7822	-0.484222	1.00897	1.01545	-1.17041	-0.757239	-0.63952	-0.0304501	0.600431	0.526713	-0.416977	0.20988	0.557554
Adur13267_comp0_c0_seq2|g.7837	-1.01529	0.684957	0.125061	-0.672063	-0.529594	0.442965	0.53581	-0.427032	-0.218682	-0.462535	0.489011	1.40801
Adur13275_comp0_c0_seq1|g.7846	0.858069	-0.739856	-0.916816	0.503841	0.391751	-0.363987	-0.358242	0.409058	-0.514174	0.328984	-0.227209	-0.855038
Adur13299_comp0_c0_seq1|g.7872	-1.16736	1.327	1.28858	-0.758044	-0.858522	-0.369011	0.0394051	-0.488397	0.331381	-0.31166	0.146273	1.06274
Adur13341_comp0_c0_seq6|g.7907	-0.519367	1.12563	0.854903	-0.607664	-0.467296	0.441803	-0.706122	-0.737412	0.323835	-0.762584	0.477505	1.06342
Adur13352_comp0_c0_seq3|g.7915	1.32503	-0.658301	-1.18388	1.12876	1.16194	-0.0285162	0.27791	0.037428	-0.652367	0.435938	-0.406823	-1.146
Adur13378_comp0_c0_seq2|g.7928	1.20102	-0.663357	-1.17128	1.17685	1.12535	-0.278038	0.417892	-0.112094	-0.590462	0.635758	-0.560393	-1.12269
Adur13408_comp0_c0_seq1|g.7946	-0.301242	0.658494	0.627765	-0.481435	-0.388465	0.704206	-0.389374	-0.492233	0.0916794	-0.46331	0.786239	0.0741422
Adur13426_comp2_c0_seq1|g.7948	-0.563804	-0.0573103	1.67622	-0.738583	-0.648831	1.24781	-0.59913	-0.973745	0.646027	-0.487876	0.258076	0.233626
Adur13506_comp0_c0_seq3|g.7971	0.00223638	1.25901	0.587222	0.0647676	-0.463291	-0.540651	-0.163197	0.0984055	0.123456	-0.558891	0.232557	-0.0879
Adur13533_comp2_c0_seq3|g.7988	1.21107	0.151726	-1.30936	1.14852	1.01387	-0.446026	0.0581645	0.402932	-0.657279	0.574992	-0.670247	-1.06271
Adur136_comp0_c0_seq1|g.99	0.0900015	-1.01196	-1.77199	0.630091	0.631893	-0.193512	0.943391	0.37194	-0.87135	0.765631	-0.220441	0.113618
Adur1366_comp0_c0_seq2|g.791	0.233991	0.693517	-0.509258	-0.16611	-0.65263	-0.505774	0.132685	-0.399799	0.378264	-0.251303	0.846959	0.568389
Adur1367_comp0_c0_seq3|g.44035	0.851212	0.667081	0.762039	0.878641	0.329449	0.648787	-0.339589	-1.28944	-0.837453	-0.335965	-0.021939	-1.04576
Adur1372_comp0_c0_seq1|g.797	0.531654	-0.500599	-0.529034	0.796215	0.73922	-0.456292	0.566861	-0.484143	-0.587933	1.05893	-0.617378	-0.421343
Adur13747_comp0_c0_seq1|g.8069	-0.75201	0.684306	0.593767	-1.30556	-0.971862	0.480452	-0.469186	-0.0448281	0.756424	-0.745047	0.596724	0.991972
Adur13752_comp0_c0_seq2|g.8073	-0.00581556	1.19062	0.532146	0.376624	-0.714822	-1.05867	0.348193	-0.0511263	0.438723	0.0538334	-0.000310211	-0.0949613
Adur13760_comp0_c0_seq1|g.8081	-0.597737	0.817901	0.63989	-0.642142	-0.656223	0.639948	-0.254137	-0.986231	0.117743	-0.545962	0.795945	0.666547
Adur13790_comp0_c1_seq1|g.8100	-0.843057	0.910995	0.124235	-0.972295	-0.924921	-0.706457	0.451158	0.0932382	0.892457	-0.0985868	0.680618	0.269234
Adur13821_comp0_c0_seq3|g.8116	-0.493147	0.410543	0.855024	-0.377671	-0.785739	-0.507268	0.825856	-0.0956396	0.325703	0.196452	0.394359	-0.512404
Adur13822_comp0_c0_seq8|g.8117	-0.324986	0.170094	0.740915	-0.677108	-0.949396	-0.235955	0.67125	-0.0931313	0.31667	0.213914	0.789017	-0.547136
Adur13992_comp0_c0_seq2|g.8203	1.05862	-0.59896	-1.29218	1.16569	0.948451	0.176851	0.520085	-0.259157	-0.909328	0.550225	-0.461614	-0.729285
Adur14034_comp0_c0_seq1|g.45415	-0.0506774	1.12523	0.897574	-0.238872	-0.693864	-0.230723	-0.0850592	-0.547685	0.0589372	-0.322733	0.233411	0.528519
Adur14044_comp1_c2_seq2|g.8217	-0.226248	1.50852	0.877468	-0.105563	-0.791826	-0.268274	0.0853381	-0.129908	0.514091	-0.367099	-0.154599	0.279778
Adur14046_comp0_c0_seq1|g.45418	-0.336255	1.03202	0.931589	-0.474741	-0.806521	-0.166669	-0.0304261	-0.372875	0.550687	-0.621882	0.105326	0.580282
Adur14065_comp0_c0_seq1|g.8221	-0.755005	1.45516	1.20166	-0.455606	-0.937826	-0.416381	0.433	0.261716	0.358974	-0.275834	-0.0366211	-0.270515
Adur14081_comp1_c0_seq1|g.8225	1.06312	-1.25307	-1.35302	0.981822	0.808231	-0.184498	0.503918	-0.023181	-1.08175	0.704932	-0.243334	-0.196138
Adur14118_comp0_c0_seq1|g.8236	0.0266042	-0.776648	-0.650076	-0.0422545	-0.0738527	1.05639	-0.213319	0.253124	-0.608413	-0.153638	-0.350434	0.490802
Adur14121_comp0_c0_seq2|g.8238	1.18689	-0.226196	-1.18722	0.699856	0.575789	-0.255301	0.6034	0.58499	-0.597397	0.62367	-0.793128	-1.05641
Adur1414_comp1_c0_seq2|g.822	1.11559	-0.148985	-0.85398	1.27271	0.98858	-0.316388	-0.017705	0.144069	-0.461225	0.65794	-0.706009	-1.19578
Adur14146_comp1_c0_seq1|g.8256	0.365035	0.884866	0.0468546	0.471304	-0.814904	-0.770403	0.0449413	-0.130688	-0.139163	-0.082236	0.232272	-0.217866
Adur14199_comp2_c0_seq1|g.8274	0.660928	-0.540523	-0.754241	0.880294	0.843022	-0.172996	0.698234	-0.617114	-0.541529	0.594266	-0.638481	-0.681337
Adur14264_comp1_c0_seq1|g.8297	1.05246	-0.773272	-1.19881	0.98373	0.830094	-0.28876	0.587806	0.504446	-0.59052	0.720116	-0.525217	-1.12306
Adur14278_comp0_c0_seq2|g.8302	-0.423436	1.27696	1.23362	-0.96774	-1.02327	-0.454933	0.164351	-0.273736	0.254562	0.0348277	0.0754291	0.319929
Adur1429_comp0_c0_seq1|g.834	1.02857	-0.961321	-1.13288	1.06189	0.880342	-0.203717	0.404947	-0.165054	-0.867582	0.982246	-0.352412	-0.724489
Adur14356_comp1_c0_seq1|g.8329	-0.786944	1.1935	1.1672	-1.06316	-0.825645	-0.566583	0.396681	-0.294801	0.543522	-0.221872	0.455227	0.803474
Adur14357_comp0_c2_seq3|g.8331	-0.593496	1.19313	1.0097	-0.411174	-0.928684	-0.599796	0.0824607	-0.0515071	0.895088	-0.336756	0.224527	0.422458
Adur14375_comp0_c0_seq1|g.8340	0.940935	-0.420947	-0.945413	0.999319	0.681552	-1.01521	0.29415	0.591247	-0.0596326	0.660913	-0.408666	-1.07204
Adur14376_comp0_c0_seq1|g.8342	0.101571	-0.656305	-1.84192	0.575341	0.535705	-0.118526	0.862652	0.651867	-0.17513	0.934169	-0.0775769	-0.944442
Adur144_comp0_c0_seq1|g.101	0.373131	-0.654844	-0.72467	0.923364	0.609098	0.0770463	0.35726	-0.62153	-0.577824	0.565216	-0.672906	-0.553931
Adur1440_comp0_c0_seq2|g.844	-0.704449	1.02157	-0.00912599	-0.668875	-1.00535	-0.889512	0.760015	0.049733	0.716737	0.188935	0.390793	0.369531
Adur14424_comp0_c0_seq2|g.8360	0.925767	-0.915014	-1.15906	0.580992	1.28882	0.0922915	0.0396835	0.0743577	-0.473136	0.269181	-0.555993	-0.888979
Adur14472_comp1_c0_seq1|g.8379	-0.493067	-0.193736	-0.866621	-0.306637	-0.224128	1.3252	0.362434	-1.08813	-0.185404	-0.21928	0.7769	0.420752
Adur14480_comp0_c0_seq1|g.8380	0.0912491	1.42781	0.751987	-0.0474697	-0.927485	-0.571615	-0.0280944	0.181469	0.247033	-0.451252	0.0359483	0.183641
Adur145_comp2_c0_seq1|g.43885	-0.407998	-0.104559	-0.102867	-0.767445	-0.630514	-0.317643	0.536989	-0.69892	0.719722	0.562454	0.907461	-0.0467661
Adur14512_comp2_c0_seq2|g.8394	-0.685655	1.20902	0.309099	-0.615477	-1.04572	-0.508743	-0.0711554	0.692757	0.69531	-0.478781	0.213245	0.61441
Adur1454_comp0_c0_seq1|g.856	0.25469	1.26701	0.248172	-0.424819	1.03435	0.650295	-0.962066	-0.720382	-0.652309	-0.846155	0.107525	0.801286
Adur14577_comp0_c0_seq4|g.8404	0.431421	-0.620951	-0.737998	0.965299	1.79556	0.209394	-0.418197	-0.357336	-0.737998	-0.129451	-0.326983	-0.737998
Adur14614_comp0_c0_seq1|g.8411	-0.00240632	-0.0820294	-0.467356	-0.180362	1.05798	1.16507	-0.924736	-0.938254	-0.728576	-0.345134	0.421901	0.889664
Adur14644_comp1_c0_seq1|g.8422	0.648354	0.344406	-0.513358	0.380704	1.09772	0.0727272	-0.648791	0.156251	-0.665479	-0.147678	-0.772882	-0.769431
Adur14663_comp1_c1_seq1|g.8434	0.0751831	-0.419221	-0.191536	0.438477	0.0740524	0.505553	0.188243	-1.78969	-0.529923	-0.281376	0.421098	0.536722
Adur14693_comp0_c0_seq1|g.8444	1.14157	-0.789641	-1.30142	0.815054	0.905443	-0.11737	0.311415	0.602853	-0.580696	0.22746	-0.313679	-1.23026
Adur14734_comp0_c0_seq1|g.8463	0.871994	-0.870524	-0.870524	1.05696	0.95523	-0.259337	0.188127	-0.410321	-0.773632	0.379965	-0.497655	-0.740621
Adur14754_comp0_c0_seq1|g.8477	0.427141	-0.605687	-0.742077	0.56957	0.558136	-0.296526	1.11801	-0.452852	-0.48705	1.0624	-0.661343	-0.508716
Adur14763_comp0_c0_seq1|g.8487	-0.535859	1.39756	0.913945	-0.430761	-0.704746	0.310358	-0.28707	-0.513987	0.0303049	-0.512063	0.240892	0.836666
Adur14766_comp0_c0_seq3|g.8488	-0.454174	-0.194068	0.371477	0.115005	-0.659738	0.484696	0.874391	-1.36132	-0.146161	0.479391	0.330744	0.546532
Adur14956_comp0_c0_seq1|g.45470	0.436031	-1.1916	-1.01953	1.45603	0.283304	0.413062	0.0338489	0.212118	-0.465232	0.513404	-0.302172	-0.511642
Adur14959_comp0_c0_seq2|g.45472	0.866354	-0.265121	-0.798006	0.798909	0.565249	-0.760138	-0.0992541	1.11099	-0.0678468	0.24015	-0.386843	-1.04881
Adur15019_comp5_c0_seq2|g.8580	-0.118985	0.931514	0.598707	-0.60818	-0.484107	0.0931981	0.31257	-0.604437	0.472501	-0.470357	-0.106824	-0.212992
Adur15030_comp1_c0_seq2|g.8582	1.23349	-0.584533	-1.02115	1.38138	1.11691	-0.0411449	0.327273	-0.527295	-1.01207	0.643269	-0.544549	-0.940011
Adur15192_comp0_c0_seq1|g.8668	0.113265	-1.50694	-1.36677	0.448809	0.249784	0.333353	0.535712	-0.0123639	-0.404831	1.18377	0.174687	-0.450945
Adur15196_comp1_c0_seq1|g.8676	-0.147487	1.77713	1.36824	-0.759211	-0.214832	0.206309	-0.830858	0.447205	-0.0799174	-0.922337	-0.132225	0.0875631
Adur15244_comp0_c1_seq1|g.8703	-0.494264	1.37856	0.565855	-0.569303	-0.857253	-0.376604	-0.188881	0.611028	0.588541	-0.633211	0.276074	0.565904
Adur15282_comp0_c0_seq7|g.8734	-0.163798	-0.117035	0.331838	-0.149683	-0.0592687	1.20809	-0.435039	-1.41598	-0.359963	-0.543766	0.28594	0.798257
Adur15328_comp0_c0_seq1|g.8754	-0.472204	0.761183	2.12926	-0.700332	-0.705216	0.201144	-0.569917	-0.36544	0.434023	-0.296461	-0.177826	-0.0430711
Adur15342_comp1_c0_seq1|g.8773	-0.447573	0.1941	0.00150499	-0.148761	0.471409	1.42635	-0.963666	-1.12014	-0.581673	-0.799741	0.570853	1.09057
Adur15342_comp2_c0_seq1|g.8775	-0.406054	0.500904	0.334679	-0.338983	0.469243	1.43038	-0.764862	-1.14676	-0.486734	-0.69398	0.22085	0.926162
Adur15372_comp1_c0_seq1|g.8798	-0.870786	0.0665774	0.379999	-0.934325	-0.32348	1.22474	-0.482382	-1.08207	0.363152	-0.29866	0.749105	1.28391
Adur15374_comp0_c0_seq1|g.8800	1.18023	-1.12633	-1.13792	0.9385	1.08585	0.291828	-0.0836795	-0.191844	-0.748397	0.363718	-0.305912	-0.836045
Adur15394_comp0_c0_seq3|g.8806	0.537933	-0.370768	-0.741904	-0.098595	0.426958	-0.466117	-0.486002	1.69677	-0.158914	0.440258	-0.108426	-0.919387
Adur15437_comp0_c0_seq1|g.8826	-0.238549	0.510962	-0.229029	-0.537524	0.218477	1.33894	-0.694093	-0.81678	-0.458314	-0.594473	0.432412	1.37673
Adur15439_comp0_c1_seq1|g.8827	0.030803	0.174387	-0.409635	-0.0614817	0.652528	1.14592	-0.605183	-1.00556	-0.75763	-0.457942	0.392177	1.10589
Adur15487_comp1_c0_seq1|g.8862	-0.0648006	1.00609	0.354543	-0.251348	-0.633012	-0.691875	0.992062	-0.689116	0.111112	0.0415542	-0.0363896	0.552687
Adur15528_comp0_c0_seq1|g.8891	1.14092	-0.698313	-0.700835	1.58268	0.853959	-0.47766	0.00129403	-0.572964	-0.706355	0.956116	-0.634095	-0.678197
Adur15566_comp0_c0_seq1|g.8925	-0.632791	-0.341507	-0.400758	-0.300961	0.968914	1.16305	-0.452275	-0.929915	-0.470474	-0.150155	0.322473	0.428082
Adur15584_comp1_c0_seq1|g.8934	-0.261641	0.64509	0.845691	-0.0136223	0.0775374	0.88041	-0.126436	-0.877403	-1.22923	-0.624466	0.397146	0.0641471
Adur15739_comp0_c0_seq1|g.8983	1.11699	-0.558018	-0.850943	1.13164	0.880693	-0.548117	0.858824	-0.304976	-0.956834	0.525593	-0.724595	-0.910279
Adur15770_comp0_c0_seq1|g.8996	0.0608767	-1.47491	-1.4368	0.0303683	0.27244	-0.203419	0.974098	0.922999	-0.459316	0.642235	0.234994	-0.494515
Adur15774_comp0_c0_seq2|g.8998	0.647	-1.2813	-1.32055	0.664492	0.655766	0.159484	0.396589	0.305278	-0.758355	0.663604	0.0969066	-0.855005
Adur1585_comp0_c0_seq1|g.44045	-1.011	-0.400902	-0.290726	-0.115004	-1.44131	0.34097	0.171153	0.142535	0.721866	0.143161	1.00014	-0.338132
Adur15873_comp0_c0_seq1|g.9059	-0.587027	-0.347944	0.170706	-0.294716	-0.407418	0.623025	0.734164	-1.10775	0.13673	0.42376	0.733735	-0.064853
Adur15876_comp0_c0_seq6|g.9063	1.14336	-0.860597	-1.29855	1.28684	0.961309	-0.0481953	0.260652	-0.333558	-0.658031	0.633035	-0.357518	-0.873614
Adur15883_comp0_c0_seq1|g.9068	1.17547	-0.478234	-1.14594	1.52166	1.13618	-0.409532	0.226653	-0.419068	-0.84007	0.564182	-0.727244	-0.912113
Adur15904_comp0_c0_seq1|g.9076	0.000768187	-0.9818	-0.489972	-0.338781	1.36075	0.475251	0.558365	0.156643	-0.244828	-0.0306698	-0.0329072	-0.854757
Adur15917_comp1_c0_seq5|g.9086	1.19821	-0.23191	-0.552713	0.866368	1.38108	0.27927	-0.443829	-0.27513	-0.838803	0.0991543	-0.840171	-1.15079
Adur1593_comp0_c0_seq1|g.876	0.126424	0.650288	0.838796	0.363314	-0.709282	0.406561	-0.280258	-0.97201	0.0538144	-0.533744	0.218541	0.616231
Adur16047_comp0_c0_seq4|g.9151	-0.685627	1.13932	0.977998	-0.715277	-0.460661	-0.357858	-0.694865	-0.064082	0.738244	-0.526249	0.193785	0.580149
Adur16053_comp0_c0_seq1|g.9155	0.049724	-0.0254076	-0.514109	0.0652051	0.956387	1.02264	-0.768357	-1.02224	-0.902279	-0.304798	0.279477	0.961909
Adur16058_comp2_c0_seq2|g.9164	-0.665915	0.162238	1.23651	-0.21322	-1.04732	-0.200055	-0.0250234	-0.196467	0.254528	0.510753	0.176821	0.213382
Adur16075_comp0_c0_seq1|g.9176	-1.3511	1.0011	0.84276	-0.396946	-0.569151	0.213708	-0.195638	-0.766729	-0.0881427	-0.351278	0.530198	1.2841
Adur16156_comp1_c0_seq2|g.9209	1.19891	-0.628354	-0.925519	0.875306	0.784908	-0.630566	0.473572	0.507549	-0.952394	0.299743	-0.295984	-0.699518
Adur16167_comp0_c0_seq1|g.45593	1.15919	-0.0205492	-0.181802	1.12645	1.15691	0.358998	-0.685333	-0.0603195	-0.69259	-0.239182	-0.876924	-1.06023
Adur16170_comp0_c0_seq6|g.9222	-0.413271	1.13429	0.75045	-0.479056	-0.670559	-0.89399	0.128401	0.540146	0.44844	-0.343123	0.27768	0.281586
Adur16182_comp0_c0_seq1|g.9230	1.43973	-0.362891	-0.886881	1.35995	1.21353	-0.542057	0.0881537	-0.0158471	-0.692091	0.362086	-0.771961	-0.710867
Adur1620_comp0_c0_seq2|g.44046	-0.790271	0.986881	0.12921	-0.461407	-0.554621	-0.574561	0.343522	-0.656448	0.637242	0.173853	0.613246	-0.232126
Adur16287_comp0_c0_seq5|g.9282	1.06264	-0.39631	-0.871246	0.89921	0.753407	-0.483947	0.306248	0.50078	-0.552769	0.721383	-0.636749	-1.38241
Adur16358_comp0_c0_seq1|g.9304	1.47023	-0.36541	-0.612921	1.47566	1.09645	-0.00765531	-0.464563	-0.541267	-0.867622	-0.053062	-0.758196	-0.894714
Adur16396_comp1_c0_seq1|g.9326	0.0100149	1.14207	0.900883	-0.455203	-0.491933	-0.744102	-0.480385	0.555851	0.559621	-0.483036	0.200789	-0.155375
Adur16454_comp0_c0_seq2|g.9347	1.10152	0.103674	-1.04262	1.08117	0.850102	-0.311185	0.108586	0.684103	-0.622115	0.516422	-0.654965	-1.07956
Adur16546_comp2_c0_seq1|g.9361	-0.34381	0.793879	-0.204552	-0.508668	-0.478475	0.418317	-0.0358791	-0.567452	0.572948	-0.296105	0.425024	0.444649
Adur16615_comp0_c0_seq2|g.9390	0.117475	-1.16482	-1.41055	0.69893	0.111009	-0.240225	1.23387	0.441849	-0.300695	0.952934	0.0447086	-0.764749
Adur16617_comp0_c0_seq1|g.9391	-0.382592	-0.405078	-0.227447	0.168367	-0.259919	0.719602	0.625052	-1.31965	-0.25275	0.966672	0.111407	-0.449368
Adur16624_comp0_c0_seq2|g.9394	-1.11426	0.361475	0.596644	-0.68349	-0.328269	0.603492	-0.116868	-1.1925	0.3339	-0.142034	0.772096	1.00636
Adur1665_comp0_c0_seq2|g.902	-0.394249	1.22053	1.19473	-0.309769	-0.660444	-0.149052	0.0355636	-0.123857	-0.216658	-0.378158	0.115378	-0.247506
Adur1665_comp1_c0_seq1|g.904	-0.359346	1.25826	1.6322	-0.239182	-0.965419	-0.732617	-0.207945	-0.0229626	0.0142238	-0.347794	0.0630186	0.0471846
Adur16658_comp0_c0_seq2|g.9410	-0.486131	1.31691	0.84943	0.381611	-0.828078	-0.948421	0.38076	-0.367806	0.716063	-0.0985524	-0.0194289	0.00607661
Adur16662_comp0_c0_seq1|g.9413	-1.22682	1.07035	0.940015	-1.10186	-1.03505	0.325251	-0.305409	0.325449	1.02602	-0.466654	0.344427	0.689783
Adur1667_comp2_c0_seq1|g.906	-0.373104	0.781143	0.929602	-0.203073	-0.999646	-0.481976	0.11006	-0.234094	0.53671	0.0426228	0.0350846	0.424689
Adur1667_comp3_c0_seq1|g.908	-0.627055	1.09327	0.46585	-0.29213	-0.995947	-0.112039	0.00499713	-0.103603	0.410823	-0.139955	0.0230227	0.810849
Adur16689_comp0_c0_seq2|g.9424	1.02162	-1.12966	-0.826641	1.17248	0.553989	-0.550877	0.188582	0.497783	-0.331125	0.694861	-0.472975	-0.746625
Adur1672_comp0_c0_seq3|g.911	-1.00372	1.11834	0.890928	-0.615376	-0.677786	0.450336	0.608135	-0.626696	0.150059	0.0980997	0.142452	0.608822
Adur16727_comp0_c0_seq1|g.9431	1.22479	-0.519113	-0.70616	0.802489	1.1127	-0.454647	-0.287339	0.305506	-0.30302	0.102231	-0.351972	-1.29665
Adur16736_comp0_c0_seq4|g.9436	0.795257	-1.20758	-0.708835	0.974718	1.08305	-0.59339	0.577768	-0.03079	-0.910767	0.600905	-0.148518	-0.51022
Adur16736_comp0_c1_seq1|g.9437	0.8206	-0.225657	-1.41976	1.07042	0.865363	-0.404315	0.519508	0.303104	-0.530799	0.740613	-0.438306	-0.775167
Adur16741_comp0_c0_seq1|g.9440	-0.309964	0.0318357	-0.227627	-0.319587	0.78326	1.23628	-0.73053	-0.764411	-0.666896	-0.67323	0.189993	0.998647
Adur16805_comp0_c0_seq1|g.9468	-0.133081	-0.204358	-0.714605	0.216761	-0.398368	-0.56384	0.795974	-0.619924	-0.360118	0.517916	0.896166	-0.0711989
Adur16880_comp0_c0_seq1|g.9501	0.581948	-0.842525	-1.09905	1.39543	0.938338	-0.264602	0.899287	-0.0118221	-0.776887	1.03355	-0.490791	-0.839135
Adur16888_comp1_c0_seq1|g.9506	-0.873572	0.446401	0.361421	-0.303001	-1.14893	-0.255668	0.437501	-0.399018	0.808428	-0.0697773	0.558869	0.25887
Adur16933_comp0_c0_seq1|g.9533	0.854634	-0.775081	-0.428886	1.01228	0.938127	-0.261022	0.122893	-0.423546	-0.865494	0.179689	-0.690022	-0.686109
Adur16964_comp1_c0_seq2|g.9558	0.0654212	0.773361	0.486117	0.299899	-1.13457	-0.781899	0.385914	-0.654188	0.65923	-0.190543	0.0221026	0.896125
Adur16965_comp0_c0_seq1|g.9559	-0.137847	1.31299	1.64315	-0.216546	-0.302668	0.344291	-0.777727	-0.533059	0.0838547	-0.619065	-0.011775	0.495236
Adur16973_comp0_c0_seq1|g.9573	-0.561909	1.01053	1.56206	-0.458191	-0.757225	-0.290498	-0.46468	-0.512258	0.45937	-0.591828	0.0445768	0.86117
Adur17038_comp1_c0_seq2|g.9620	-0.0162481	-0.332427	-0.981069	0.448062	0.0775264	0.518771	0.271062	-1.32336	-0.301463	0.309387	0.589297	0.107971
Adur17046_comp0_c0_seq1|g.9625	-0.0891772	-0.957536	-0.338354	0.105639	-0.0373484	-0.827384	0.558862	1.43587	-0.297058	0.863644	-0.0220153	-0.782441
Adur1709_comp0_c0_seq1|g.927	1.66581	-0.142705	-0.404901	1.33028	1.02301	-0.494837	-0.508698	-0.143501	-0.720295	-0.263177	-0.869339	-1.00709
Adur17152_comp1_c0_seq1|g.45672	-0.693181	1.05576	0.536654	-0.868387	-0.679929	-0.0268664	-0.0138218	-0.371402	0.148078	-0.574363	0.818793	1.6283
Adur17199_comp0_c0_seq4|g.9722	-0.696403	0.793604	0.76034	-1.42073	-0.177273	0.454421	-0.711021	0.00808204	0.237597	-0.590596	0.626515	-0.0868237
Adur17205_comp0_c0_seq2|g.9724	-1.03019	0.188334	0.0100801	-0.667832	-1.37831	-0.53545	1.12101	0.114825	0.831388	0.50899	0.562266	0.34553
Adur17213_comp0_c0_seq8|g.9729	0.722756	-0.450015	-1.38388	0.832685	1.11069	-0.622806	0.299101	0.566943	-0.480006	0.33426	-0.364609	-0.854473
Adur17278_comp0_c0_seq2|g.45683	-0.287597	1.47407	1.25903	-0.340808	0.153167	0.401526	0.2086	-0.55092	-1.01294	-0.481537	0.106093	0.166613
Adur17280_comp0_c0_seq6|g.9759	-0.113461	-1.37721	-1.24763	-0.298049	0.49903	0.755143	0.440483	-0.0815284	0.13695	0.643445	0.331788	-0.40223
Adur173_comp0_c0_seq6|g.43888	0.227353	0.629035	0.281636	-0.218085	-0.463321	0.0673722	0.434337	-0.759951	0.0762799	-0.0403328	0.614476	-0.164656
Adur173_comp1_c0_seq1|g.122	-0.125451	0.337588	-0.012412	-0.281009	-0.650189	-0.0356974	0.287879	-0.642934	0.0223683	0.22729	0.819714	0.293862
Adur1747_comp1_c0_seq27|g.949	0.316319	0.218379	0.0282944	0.117488	-1.03115	-0.36448	0.904141	-0.44664	0.358414	0.280835	0.470581	-0.213741
Adur17494_comp0_c0_seq1|g.45705	-0.607533	0.782978	0.220452	-0.963936	-0.961631	0.242496	0.134263	-0.129488	1.27341	-0.35979	0.478371	0.0179212
Adur17502_comp1_c0_seq1|g.9916	1.26185	-1.09689	-0.751983	0.882371	0.988469	-0.154932	0.488009	-0.13798	-0.613554	0.375404	-0.613442	-0.953952
Adur17502_comp2_c0_seq1|g.9917	1.07715	-0.775994	-0.981355	0.990383	0.862956	-0.0461791	0.633312	0.0801647	-1.01102	0.541393	-0.616649	-1.0053
Adur1751_comp0_c0_seq2|g.954	1.07381	-0.135675	-0.972618	1.14625	0.828037	-0.369139	0.18874	0.447905	-0.269958	0.632864	-0.760797	-1.01748
Adur17520_comp0_c0_seq1|g.9927	-0.246259	0.767027	-0.160872	0.454459	-0.609511	-0.275218	0.235062	-0.0975858	-0.0929175	0.169452	0.649686	-0.997886
Adur17566_comp0_c0_seq3|g.9952	0.0343711	0.857187	0.425643	0.337566	-0.434764	-0.965111	0.3053	-0.45341	0.518961	0.0112757	0.382461	-0.967632
Adur17582_comp0_c0_seq1|g.9960	1.2469	0.245873	-0.809404	1.42089	1.15098	0.138377	-0.104526	-0.337375	-0.904058	0.328743	-0.995487	-1.0421
Adur17584_comp0_c0_seq1|g.9961	-0.949267	0.236446	0.873441	-1.11897	-0.561059	-0.296107	0.179933	-0.372805	0.380141	-0.0505041	0.654438	1.03637
Adur17589_comp0_c0_seq1|g.9963	1.16769	-0.867706	-0.95299	1.07057	0.98473	-0.556044	0.66795	-0.145243	-0.733412	0.804684	-0.724091	-0.420293
Adur17591_comp2_c0_seq1|g.9965	0.0722905	0.735537	-0.167729	0.135152	-1.21614	-0.616663	0.566714	0.032155	1.19609	0.191469	0.168798	0.0674451
Adur17598_comp0_c0_seq1|g.9971	-0.086975	0.552636	-0.565548	0.112516	-0.0614733	0.01434	0.517349	-0.750013	-0.186752	0.0905504	0.3409	-0.324487
Adur17628_comp0_c0_seq1|g.45723	1.03667	-0.747518	-1.02398	1.34806	1.09976	-0.150166	0.442598	0.138382	-0.876186	0.808844	-0.650858	-1.00504
Adur17630_comp0_c0_seq1|g.9995	-0.0906137	1.42319	1.32188	-0.503624	-0.399266	-0.270294	-0.419548	-0.0726424	0.399619	-0.985151	-0.132989	0.0813636
Adur17637_comp2_c0_seq1|g.9998	1.21831	-0.818736	-0.903654	0.825866	0.981056	-0.0174534	0.422574	0.25503	-0.983292	0.437984	-0.349196	-1.19839
Adur17641_comp0_c0_seq1|g.10003	-1.07673	0.949366	0.775724	-0.691613	-0.436135	-0.0960661	0.476735	-0.90245	0.229041	0.0162298	0.438999	1.16597
Adur17668_comp2_c0_seq1|g.10022	0.754718	-0.763752	-0.837631	0.86816	1.36119	-0.760503	0.683449	0.166895	-1.04655	0.0611717	-0.232722	-0.944804
Adur17751_comp3_c0_seq4|g.10060	-0.580742	0.631391	0.695022	-0.470801	-0.685677	0.0359293	0.497095	-0.648312	0.198793	0.0207709	0.789326	-0.079991
Adur17776_comp0_c0_seq2|g.45744	-0.540537	0.330568	0.970489	-0.495512	-0.0640711	0.637165	-0.123768	-0.52247	-0.146887	-0.713331	0.578133	-0.115792
Adur17832_comp0_c0_seq3|g.10113	-0.356547	1.04123	1.01505	-0.148026	-0.912995	-0.331399	-0.00980714	-0.696427	0.768449	-0.197369	0.245144	0.232492
Adur1785_comp1_c0_seq2|g.973	1.01735	-0.779967	-1.54277	0.944824	0.477183	-0.590845	0.91692	0.286282	-0.292848	1.11198	-0.167146	-0.82818
Adur1789_comp0_c0_seq1|g.975	-0.774545	-0.124868	1.15566	-0.719091	-0.964665	-0.20217	0.418701	0.0077666	0.33131	-0.251861	0.40592	1.01147
Adur1789_comp1_c0_seq1|g.977	-0.39214	-0.106912	1.09181	-0.704761	-0.907644	-0.362922	0.369786	-0.0886679	0.471269	-0.280097	0.383021	0.739024
Adur18009_comp4_c0_seq3|g.10230	1.68926	-0.51144	-0.754807	0.701424	1.62304	-0.131158	-0.47084	-0.197255	-0.723419	-0.0297313	-0.741689	-0.738672
Adur18030_comp1_c0_seq2|g.10255	0.779745	-0.585392	-0.847988	1.1999	1.31719	0.274247	-0.0956536	-0.555787	-0.926718	0.322789	-0.685049	-0.933532
Adur18043_comp0_c0_seq1|g.10269	-1.12434	1.11223	0.848247	-0.664123	-0.981024	-0.319441	-0.100113	0.00647993	0.759354	-0.200029	0.448409	0.71225
Adur18048_comp0_c0_seq1|g.10275	0.238054	-0.824017	-1.34709	-0.00189701	0.208453	0.332322	0.390279	1.04001	-0.748051	0.42093	-0.422693	0.319517
Adur18114_comp2_c0_seq1|g.10345	0.910557	-0.92652	-1.01773	1.16908	1.02603	-0.359219	0.0370738	-0.0508592	-0.583054	0.688341	-0.55934	-0.890264
Adur18121_comp0_c0_seq3|g.10352	1.17376	-0.164279	-0.689421	1.96802	1.01582	0.21444	-0.282823	-0.440854	-0.867478	-0.392348	-0.804415	-0.95621
Adur18140_comp0_c0_seq1|g.10374	-0.890616	-0.220637	-0.341759	-0.60529	-1.12716	0.142847	1.051	-0.0416838	0.681741	0.746127	0.740059	0.427902
Adur18157_comp0_c0_seq1|g.10392	0.688547	-0.328644	-1.46357	0.906212	0.769039	-0.933924	0.694938	0.837397	-1.081	0.573516	-0.0787812	-0.798942
Adur18166_comp1_c0_seq1|g.10396	-0.225617	1.2183	0.562628	0.705969	-0.960634	-0.648591	0.533122	-0.00585227	-0.195513	0.170966	0.00492486	-0.374584
Adur18167_comp0_c0_seq2|g.10398	0.295122	1.15799	0.271503	1.09158	-0.358936	-0.480993	0.494628	-0.768248	-0.527655	-0.0362435	-0.175079	-0.125736
Adur18184_comp0_c0_seq4|g.10406	-0.0160402	1.20494	0.819467	0.0931604	-0.529052	-0.918059	0.141881	-0.237087	0.45672	-0.353738	-0.0614433	-0.0155528
Adur18227_comp0_c0_seq1|g.10433	-0.482546	1.24376	1.22264	-0.474324	-0.861621	-0.756622	0.469205	0.136669	0.456564	-0.19722	-0.000380687	0.125945
Adur18245_comp0_c0_seq1|g.10451	1.21058	-0.903192	-1.04707	1.27855	1.08111	-0.216581	0.180255	-0.075151	-0.778783	0.651841	-0.335429	-0.846672
Adur1827_comp0_c0_seq1|g.990	-0.664223	1.18678	1.46528	-0.610409	-1.00829	-0.337452	-0.0213337	-0.134317	0.651341	-0.374324	0.0548005	0.666097
Adur18393_comp0_c0_seq1|g.10524	-0.478929	0.958924	1.1743	-0.277319	-1.01369	-0.00158488	0.103941	-1.15903	0.696377	0.0572429	0.124888	0.292581
Adur18425_comp0_c0_seq1|g.10554	0.277491	-0.810966	-1.11188	0.87986	0.65349	-0.264224	1.05557	-0.475784	-0.668829	1.12687	-0.632458	0.197438
Adur18460_comp0_c0_seq1|g.10590	0.95057	-0.808069	-0.656121	1.27328	0.564924	-0.208725	0.808273	-0.54493	-0.611252	0.464282	-0.626935	-0.793399
Adur18482_comp1_c0_seq3|g.10605	1.52308	0.190634	-0.774408	1.0155	0.777256	-0.497526	0.730872	0.291653	-0.970036	-0.0893157	-0.803804	-0.515237
Adur1850_comp1_c0_seq2|g.1000	0.745314	-0.173449	-1.20175	0.0910429	1.0263	-0.171106	0.840984	0.807035	-0.620861	0.199829	-0.429734	-1.20204
Adur18527_comp0_c0_seq1|g.10631	1.24397	-0.981221	-1.05382	0.975007	1.03575	0.204819	-0.0149477	-0.0550931	-0.581235	0.492286	-0.31783	-1.14575
Adur18536_comp1_c0_seq1|g.10643	-0.148737	0.605057	0.0829013	0.931332	-0.445364	-0.498383	0.489255	-1.1894	0.393951	0.487081	-0.00815365	-0.476491
Adur18576_comp1_c0_seq2|g.45835	0.613792	-1.75309	-1.19834	0.424422	0.625065	-0.209419	-0.00686152	0.420447	-0.464218	1.19978	0.12967	-0.031167
Adur18719_comp0_c0_seq1|g.10726	-0.686629	0.934793	1.01488	-0.758802	-1.06041	-0.651599	0.0419682	0.477104	0.99444	-0.250944	0.417008	0.261942
Adur1875_comp0_c0_seq1|g.1008	-0.819924	0.6591	0.960156	-0.226888	-1.11494	0.472606	-0.251175	-0.977852	0.784692	-0.144004	0.448863	0.643542
Adur18764_comp0_c0_seq1|g.10772	0.482471	-1.01886	-1.16366	0.922078	0.638643	-0.137163	0.92663	-0.211362	-0.844848	0.481915	-0.180748	-0.261494
Adur18784_comp1_c0_seq2|g.10797	1.26914	-0.707761	-1.26758	1.20801	0.816419	-0.450063	0.921239	0.054415	-0.540212	0.494836	-0.491975	-1.19284
Adur18784_comp2_c0_seq1|g.10798	1.18478	-0.268257	-1.31783	1.26165	0.918896	-0.502856	0.579908	0.107734	-0.671273	0.732858	-0.47717	-1.2437
Adur18868_comp0_c0_seq10|g.10825	-0.448828	0.964156	0.547145	0.326481	-1.12712	-1.09885	0.186637	-0.054367	0.79104	0.445114	0.077636	0.351044
Adur18886_comp1_c0_seq1|g.10839	1.30041	-0.0608171	-1.06339	1.15103	0.818401	-0.386259	0.289171	0.178351	-0.474763	0.850042	-0.611044	-1.4248
Adur18894_comp0_c0_seq1|g.10844	-0.365126	0.771378	0.164693	-0.184311	-0.664487	-0.600405	0.708389	-0.258174	-0.0706666	0.0332139	0.816412	-0.139789
Adur19028_comp0_c0_seq1|g.10903	0.285021	1.20596	0.828531	0.407509	-0.351596	-0.922776	1.19853	-0.5079	-0.195233	0.61673	-0.321278	-0.450875
Adur19039_comp0_c0_seq2|g.45863	-0.462931	2.08011	0.98181	-0.605188	-0.424481	-0.252989	-0.00416678	0.454149	-0.141939	-0.699572	0.0154747	-0.23886
Adur19039_comp0_c0_seq8|g.10906	-0.545017	1.28905	1.5241	-0.744634	-0.757685	-0.41739	-0.0178897	-0.590881	0.482154	-0.482355	0.208885	0.492257
Adur19047_comp1_c0_seq1|g.10909	-0.269341	1.77549	0.603367	-0.567289	-0.659919	-0.523615	0.0273071	0.122139	0.506005	-0.33864	0.179516	-0.48898
Adur19051_comp0_c0_seq1|g.10912	-0.563585	-0.239715	-0.228845	0.171614	-0.731687	-0.696667	0.670515	-0.71427	0.772362	0.523091	0.880305	-0.657016
Adur19071_comp0_c0_seq3|g.10924	1.09155	-0.711582	-0.689122	0.536052	0.454654	-0.688884	-0.085256	0.810935	-0.125553	0.478152	-0.222765	-1.1534
Adur19176_comp0_c0_seq1|g.10961	0.555676	-0.995344	-1.2187	0.585725	0.999464	-0.092471	0.214977	0.456044	-0.733677	0.510226	-0.0988832	-0.57353
Adur19218_comp0_c0_seq1|g.10988	-0.18708	0.742137	1.10475	0.15587	-0.296559	-0.513787	-0.479866	-0.920218	-0.113394	0.146343	0.381747	-0.0342737
Adur19261_comp2_c0_seq4|g.11013	0.094491	0.202009	-0.0518429	0.0925274	0.554619	1.17531	-0.540635	-1.62215	-0.880039	-0.513753	0.383519	0.898215
Adur19296_comp0_c0_seq9|g.11025	-0.0184042	0.885563	0.0767562	0.162016	-0.759002	-0.721495	1.00346	0.121629	0.212033	0.639323	0.296747	-0.132735
Adur19520_comp2_c0_seq1|g.11187	1.36857	-0.198478	-0.955104	1.34945	1.20952	-0.254964	0.0111876	0.0528917	-0.886646	0.257015	-0.825037	-1.14035
Adur19526_comp0_c0_seq1|g.11194	1.03652	-0.887621	-0.887621	1.02543	0.949735	-0.608734	0.368907	-0.582649	-0.572205	0.934463	-0.608999	-0.479666
Adur19533_comp0_c0_seq1|g.45920	-0.650595	0.734261	0.802975	-0.884909	-0.574761	0.451804	-0.730819	-0.47765	0.219241	-0.830579	0.650455	0.740763
Adur19612_comp0_c0_seq1|g.11265	0.655632	-0.695346	-1.18938	1.47393	0.937785	-0.420055	0.234922	-0.0288859	-0.764945	0.52857	-0.346521	-0.695951
Adur19630_comp0_c0_seq1|g.11273	1.13056	-1.07752	-0.616194	1.23231	1.10472	0.106338	0.147702	-0.218252	-0.847783	0.531184	-0.576251	-1.24892
Adur19651_comp0_c0_seq1|g.11279	0.850483	-0.530555	-0.447227	1.45747	0.857571	-0.562428	0.782057	-0.45194	-0.490567	0.651227	-0.778572	-0.884549
Adur19757_comp0_c0_seq1|g.11364	0.844452	-0.857583	-1.069	0.679452	0.811345	-0.319563	0.16634	0.342698	-0.621179	0.668964	-0.716512	-0.548368
Adur19791_comp0_c0_seq1|g.11394	-0.531342	-0.065645	-0.0230863	-0.562378	-0.325238	-0.138169	0.652161	-0.656915	-0.253042	0.393551	0.656396	0.929963
Adur19793_comp0_c0_seq1|g.11395	-0.837957	1.15153	0.799361	-0.794659	-1.02538	-0.639561	0.413627	0.402375	0.679611	-0.159159	0.402032	0.376379
Adur19848_comp1_c0_seq1|g.11438	0.486586	0.918335	0.14726	0.637033	-0.68254	-0.871465	-0.00398391	-0.144256	0.450386	0.396282	0.0364361	-0.251325
Adur1985_comp0_c0_seq8|g.1063	-0.380605	0.168257	0.420997	0.165191	0.355199	0.976107	-0.0338659	-1.72442	-0.698228	-0.14592	0.0887371	0.223963
Adur19859_comp0_c0_seq2|g.11448	-0.794029	0.1818	0.385911	-0.574955	-0.444888	0.755791	0.341326	-0.951952	-0.0262691	-0.0517749	0.714849	0.623041
Adur19863_comp1_c0_seq1|g.11452	1.3156	-0.622453	-0.795134	1.48037	0.673546	-0.522224	0.345283	0.109655	-0.611354	0.618587	-0.642787	-1.00567
Adur19864_comp0_c0_seq2|g.11453	1.12257	-0.422345	-1.13326	1.28132	0.941523	-0.587299	0.0758768	-0.0451691	-0.502773	0.729959	-0.614724	-1.13013
Adur19868_comp0_c1_seq1|g.11466	0.0498397	1.51028	-0.786381	0.589387	-0.299642	-0.470005	0.0666657	0.242962	-0.524304	-0.305614	0.761265	0.00413034
Adur19943_comp0_c0_seq1|g.11492	1.0197	-0.758346	-0.709122	1.04819	1.08308	-0.171879	0.173308	-0.381479	-0.880171	0.464458	-0.743125	-0.871545
Adur2002_comp1_c0_seq4|g.1071	1.15716	-0.727322	-1.05557	0.879325	1.05689	-0.447317	0.597201	-0.261048	-0.852021	0.292809	-0.268337	-1.0618
Adur2006_comp1_c0_seq1|g.1078	1.35644	-0.409786	-1.13621	1.48816	0.616889	-0.239969	0.357207	-0.122134	-0.81104	0.622045	-0.66774	-1.04945
Adur20084_comp0_c0_seq1|g.11559	1.02666	-0.603051	-0.905371	1.59399	0.83404	-0.230773	0.270147	-0.111386	-0.806803	0.614995	-0.597584	-1.06945
Adur20115_comp0_c0_seq1|g.11578	1.27545	0.041046	-0.776073	1.25419	0.863179	-0.837946	0.175544	0.379398	-0.510541	0.547915	-0.602135	-1.46702
Adur2013_comp5_c0_seq11|g.1089	-0.746973	-0.221671	-0.0128017	-0.73979	-1.16109	-1.16558	0.558582	0.629955	1.10057	0.581341	0.932255	0.490774
Adur2014_comp0_c1_seq1|g.1092	-0.346247	1.12753	-0.0139737	-0.14906	-0.908604	-1.43928	0.598009	0.353029	0.605642	0.380146	0.301815	0.276135
Adur20145_comp0_c0_seq1|g.11606	-0.346491	1.34458	0.794493	-0.669587	-0.398709	-0.634406	0.0672559	0.0148556	0.61588	-0.32416	0.124698	-0.145501
Adur20219_comp0_c0_seq1|g.11659	-0.605087	0.246438	0.696988	-0.127695	-0.245285	0.701598	-0.0151805	-0.783518	-0.713823	-0.840823	0.367056	1.29687
Adur20231_comp1_c0_seq1|g.11667	0.555604	-1.28163	-0.57262	0.434164	0.144737	0.175932	1.18413	0.6514	0.0191921	0.763047	-0.779519	-0.385871
Adur20233_comp0_c0_seq1|g.11668	-0.81259	-0.628319	-0.754198	-0.809991	-0.896625	-0.783227	0.423856	-0.0265268	0.758247	0.49912	1.38784	1.69127
Adur20239_comp0_c0_seq2|g.11672	1.21508	-1.07312	-0.928506	1.33083	0.690427	0.0797069	0.290957	-0.625349	-0.584653	0.353531	-0.716273	-0.545065
Adur20243_comp0_c0_seq2|g.11677	-0.251943	0.105298	0.328642	0.0339847	-0.18135	1.11203	-0.498577	-1.2901	-0.312216	-0.283282	0.598281	0.886729
Adur2025_comp0_c0_seq4|g.1100	0.829765	-0.976674	-1.27444	1.05391	1.16367	0.252722	-0.200504	-0.472487	-0.587011	0.524165	-0.478272	-0.683341
Adur20341_comp0_c0_seq1|g.11751	-0.833807	1.05787	0.941632	-0.0748458	-0.866043	-0.0473058	0.349052	-0.296638	0.48814	-0.358953	0.0664997	0.0458118
Adur20365_comp0_c0_seq1|g.11758	-0.604122	-0.126828	-0.573642	-0.284296	-1.15677	-0.875871	1.55624	0.440551	0.795258	0.744631	0.733876	-0.00294972
Adur20392_comp1_c0_seq1|g.11782	0.100437	0.650342	-0.128437	-0.388009	-0.239933	1.33269	-0.507225	-0.870745	-0.488611	-0.635315	0.554559	0.80273
Adur20394_comp1_c0_seq1|g.11784	1.22553	-0.77134	-0.829783	1.81157	0.97256	-0.506699	-0.147677	-0.209328	-0.836345	0.5201	-0.659292	-0.711748
Adur20518_comp0_c1_seq1|g.11844	-0.575414	1.15178	1.3844	-0.633522	-0.80275	-0.693163	-0.109458	0.408828	0.567627	-0.322071	0.122346	0.306438
Adur20594_comp0_c0_seq1|g.11876	1.28164	-0.381078	-0.79891	1.29392	0.897196	-0.319056	0.606196	0.272558	-1.09704	0.446934	-0.431079	-1.58983
Adur20615_comp0_c0_seq6|g.11883	1.08608	-0.455658	-1.0336	1.31135	1.13054	0.0240411	0.182832	-0.0892501	-0.752286	0.535966	-0.358909	-1.33939
Adur20710_comp0_c0_seq1|g.11932	1.14994	-0.340548	-1.10358	1.19711	0.599263	-0.879903	0.679719	0.598607	-0.718657	0.737957	-0.187387	-1.52801
Adur20767_comp2_c0_seq2|g.11981	-0.809642	0.910969	0.734687	-0.477881	-1.21477	-0.147642	0.159336	0.150584	0.640526	-0.293412	0.217531	0.166334
Adur20772_comp2_c0_seq2|g.11983	0.393155	-0.868881	-0.947748	0.819639	1.20173	-0.0215197	0.418964	-0.432186	-0.752392	0.777124	-0.451272	-0.77327
Adur20783_comp0_c0_seq3|g.11992	1.10165	-0.772109	-1.4149	1.0391	1.18329	-0.114563	0.283019	-0.317817	-0.624061	0.64686	-0.353993	-0.830886
Adur20789_comp0_c0_seq1|g.11995	0.755628	-0.599189	-0.652697	0.97418	0.729052	-0.539903	1.17895	-0.588012	-0.650094	0.977201	-0.579619	-0.624413
Adur20802_comp0_c0_seq1|g.11999	-0.117626	1.20193	1.15387	0.0261631	-0.798372	0.00227428	0.245558	-0.44913	0.298277	-0.330393	0.182472	-0.201595
Adur20908_comp0_c0_seq1|g.12045	0.137684	1.40656	1.6072	-0.0492535	-0.601059	-0.3024	-0.597444	-0.155262	0.0786795	-0.235792	-0.323346	0.204729
Adur20935_comp1_c0_seq2|g.12076	-0.738775	1.3196	0.0372346	-0.713346	-0.859694	-0.805549	0.565891	0.546343	0.630853	-0.123465	0.360923	0.936419
Adur21005_comp0_c0_seq1|g.12103	-0.683806	1.01003	0.917082	-0.937263	-1.10268	-0.570032	-0.242281	0.0464854	0.89224	-0.141005	0.603508	0.384039
Adur21009_comp1_c0_seq1|g.12105	-0.785511	0.812273	0.258841	-0.746507	0.365895	0.907904	-0.766007	-1.05655	-0.084042	-0.712397	0.584189	1.10335
Adur21076_comp0_c0_seq1|g.12144	-1.0931	0.94893	1.08888	-0.405342	-0.768655	1.39586	-0.135497	-0.674842	-0.112177	-0.711862	0.00879131	1.09314
Adur21078_comp1_c0_seq1|g.12149	0.854074	-0.758118	-0.746732	1.4296	1.02363	0.203515	0.0942892	-0.311761	-1.12464	0.330403	-0.445809	-0.754011
Adur21082_comp0_c0_seq2|g.12154	-0.844016	1.19806	1.00075	-0.92656	-0.828938	-0.123415	-0.571885	-0.0979344	0.783776	-0.507941	0.466029	0.50746
Adur21090_comp0_c0_seq2|g.12163	1.20455	0.0147715	-1.04234	1.24972	0.974103	-0.309875	0.273295	0.388259	-0.968128	0.61209	-0.68715	-1.14645
Adur21154_comp0_c0_seq1|g.12190	1.2164	-0.753513	-1.0161	0.73418	0.984047	0.015476	0.207613	-0.144532	-0.693815	0.446589	-0.680897	-0.892393
Adur21155_comp0_c0_seq2|g.46088	-0.770521	1.28538	1.14723	-1.11	-0.707459	-0.274823	-0.140689	0.577174	0.366067	-0.619351	0.215348	0.324455
Adur2120_comp0_c0_seq1|g.1165	-0.909916	0.931546	1.10732	-0.735997	-0.731197	-0.168943	-0.186865	-0.196032	0.466119	-0.579871	0.306471	0.969793
Adur2121_comp0_c0_seq1|g.1166	-0.562117	-0.0596886	0.359916	0.0177519	-0.145862	0.889773	-0.0245984	-1.17558	-0.821742	0.191307	0.319239	0.526403
Adur21245_comp0_c0_seq1|g.12227	-0.535139	1.27338	1.36644	0.0316639	-0.532351	-0.0792543	-0.0812255	-1.01299	0.113889	-0.286744	0.298973	-0.423112
Adur21352_comp1_c0_seq1|g.12285	0.510014	1.48966	1.1263	0.654076	0.0457775	-0.253866	-0.333706	-0.77207	-0.378788	-0.711718	-0.489508	-0.163358
Adur21439_comp0_c0_seq1|g.12356	0.888607	-0.945542	-0.877227	0.848603	0.93864	-0.0674105	-0.152112	-0.450481	-0.780313	0.143652	-0.473858	-0.492463
Adur21483_comp0_c0_seq3|g.12366	1.2077	-0.636745	-1.11592	1.51614	0.75097	-0.224229	0.48609	-0.171308	-0.798144	0.522168	-0.58329	-0.819219
Adur21491_comp1_c0_seq3|g.12371	1.05465	-0.363706	-1.09515	1.07951	0.990059	-0.209747	-0.123195	0.476167	-1.03742	0.692629	-0.667975	-0.878047
Adur21520_comp2_c0_seq2|g.12383	-0.853561	-0.715032	-0.903564	-1.01009	-0.879824	-0.569962	1.42546	0.216418	0.872761	0.696352	1.24343	0.484701
Adur21598_comp2_c0_seq2|g.12402	0.95891	-0.521082	-1.19159	0.962306	0.740606	-0.561068	0.533401	0.637941	-0.276734	0.895161	-0.396119	-1.03791
Adur21731_comp0_c0_seq1|g.12471	0.757286	-0.907511	-1.46576	1.15602	0.777721	-0.0107019	0.623809	-0.00610791	-0.642191	0.612238	-0.326998	-0.934473
Adur21734_comp0_c0_seq20|g.46121	0.173317	-0.625004	-0.625004	0.672558	1.89084	1.23733	-0.625004	-0.502975	-0.625004	-0.427521	-0.311823	-0.625004
Adur2176_comp0_c0_seq3|g.1226	1.15809	-0.122576	-0.82836	0.867833	1.14477	-0.572991	-0.0959645	0.948156	-0.814818	0.21983	-0.641767	-1.46331
Adur21761_comp0_c0_seq1|g.12486	0.73159	-0.812837	-0.82479	1.10368	0.852898	-0.258475	0.0547281	0.464966	-0.892217	0.430494	-0.420869	-1.04343
Adur21843_comp0_c0_seq1|g.12545	0.536854	0.540354	-0.17076	0.650732	-0.0236574	-0.336279	0.116345	-0.535537	-0.499441	0.305594	0.258606	-0.596472
Adur21844_comp0_c0_seq2|g.12547	-0.0622003	1.32261	0.955911	-0.203934	-0.893887	-0.341984	0.263182	0.357816	0.299251	-0.409901	0.0717676	-0.214427
Adur21897_comp2_c0_seq1|g.12577	0.0583822	-0.637304	-0.757393	0.812767	1.03443	0.489916	0.531723	-0.389973	-0.757393	0.044589	-0.477928	-0.114319
Adur21906_comp1_c0_seq1|g.12583	0.627821	-0.868366	-1.56275	0.198887	0.756534	-0.254653	0.534971	1.00758	-0.857418	0.938234	0.0944744	-0.403701
Adur21908_comp0_c0_seq3|g.12587	1.00719	-0.68423	-1.43759	0.938009	0.856186	-0.418132	0.77551	0.032095	-0.521323	0.780949	-0.479347	-1.0099
Adur21928_comp0_c0_seq1|g.12610	-0.572895	1.34951	0.911297	-0.414874	-0.906356	-0.645221	0.156527	0.187568	0.643499	-0.425952	0.336484	0.337224
Adur2193_comp1_c0_seq1|g.1248	0.0498106	-0.423321	-0.355236	0.26281	1.00635	0.197303	-0.263774	-0.0936763	-0.423321	0.299422	-0.376082	-0.423321
Adur22031_comp0_c0_seq1|g.12663	1.3378	-0.500523	-1.11126	1.3613	0.899133	-0.130866	0.408433	-0.238053	-0.493548	0.547888	-0.724914	-0.892386
Adur22057_comp0_c0_seq3|g.12680	-0.442709	1.28685	1.12997	-1.01034	-0.855795	-0.208449	-0.725613	0.399439	0.264301	-0.530372	0.418366	0.864757
Adur22098_comp0_c0_seq1|g.12714	-0.887732	-0.182994	0.0794682	-0.478519	-1.23658	-0.114455	0.452677	-0.442	0.820448	0.622332	0.771755	0.0383484
Adur22113_comp0_c0_seq2|g.12717	1.14609	-0.286301	-1.12285	0.829914	0.885102	-0.466338	0.774606	0.896242	-0.929605	0.38315	-0.531751	-1.05351
Adur22158_comp0_c0_seq1|g.12739	-0.453368	1.81134	0.916601	-0.866465	-0.599576	-0.0683359	0.135555	0.298464	-0.140139	-0.63441	0.126139	-0.158774
Adur22185_comp1_c0_seq1|g.12755	-0.887177	0.47517	0.408698	-0.791441	-0.510332	0.563877	0.266432	-0.902803	0.195504	-0.112166	0.761967	0.472032
Adur22190_comp0_c0_seq1|g.12758	1.08657	-0.628398	-1.72859	0.715792	0.877218	0.315489	0.66265	0.229216	-0.566054	0.607297	-0.31168	-1.38804
Adur22192_comp0_c0_seq2|g.12760	1.35513	-0.739559	-0.437271	1.54747	0.779346	-0.493833	-0.518564	-0.45428	-0.569087	-0.0614011	-0.710504	-0.70257
Adur22221_comp0_c0_seq1|g.12782	0.0268689	1.12959	1.13557	-0.12507	-0.975985	-0.657948	-0.179085	-0.0865825	0.479499	-0.160012	0.0399121	-0.0774185
Adur22242_comp2_c0_seq1|g.12803	0.61323	0.620534	-0.263743	-0.397693	0.724388	-0.172498	-0.749206	1.46132	-0.342834	-0.309248	-0.501351	-0.687168
Adur22267_comp0_c0_seq2|g.12817	0.58635	-1.15176	-1.45947	0.894666	0.976066	0.432425	0.775492	-0.366834	-0.55716	0.475206	-0.428302	-0.391898
Adur22293_comp3_c0_seq1|g.12836	1.19731	-0.733318	-1.01086	1.13233	0.923086	-0.465446	-0.0124093	-0.0865041	-0.662665	0.717131	-0.518953	-1.24345
Adur22301_comp0_c0_seq1|g.12843	-0.334575	-0.650747	-0.157171	-0.0698513	1.08023	0.312133	0.240405	0.735773	-0.605018	0.246192	-0.976774	-0.751117
Adur22427_comp1_c0_seq1|g.12936	-0.772761	1.10064	1.38169	-0.88816	-0.98067	0.298616	0.0504507	-0.618665	0.36787	-0.558359	0.25563	0.78856
Adur22452_comp0_c0_seq3|g.12946	-0.48048	0.521986	0.423396	-1.30648	-1.10315	-0.716623	0.343783	0.867338	0.768154	-0.425959	0.595648	0.434191
Adur22514_comp1_c0_seq2|g.12974	0.975658	-0.876292	-0.832393	0.901478	1.37279	-0.291184	-0.052911	0.120598	-0.562915	-0.162759	-0.810566	-0.536119
Adur22535_comp1_c0_seq2|g.12992	-0.221502	1.11007	0.823645	-0.943926	-0.495801	-0.0529723	-0.489362	-0.023762	0.399196	-0.478535	0.54437	-0.286526
Adur22538_comp0_c0_seq1|g.12996	-0.368937	0.0902689	-0.610383	-0.271474	-0.4688	-0.51978	1.41545	-0.392921	0.00703846	0.58722	0.57367	0.720963
Adur2258_comp0_c0_seq1|g.1312	0.789357	0.625644	0.0309561	0.545103	0.239834	0.87242	-0.426781	-1.21022	-0.734726	-0.120599	-0.0435696	0.379221
Adur22613_comp0_c0_seq2|g.13029	-0.272408	0.0888678	0.346756	0.172446	-0.527309	-0.314663	0.749366	-1.05128	0.206112	0.113054	0.422242	-0.188637
Adur22676_comp0_c0_seq2|g.13064	0.384806	0.987131	1.47907	0.111528	-0.519071	-0.127889	0.172546	-0.859856	0.0447511	-0.967664	-0.0551917	0.252437
Adur2273_comp1_c0_seq2|g.1315	0.251315	1.86894	0.199475	-0.605718	-0.073149	-0.582859	0.0867838	-0.170151	0.176377	-0.530317	0.185552	-0.170644
Adur22746_comp0_c0_seq5|g.13103	0.686937	-0.459469	-1.3362	0.668635	1.15903	0.494864	0.317315	0.219439	-0.62053	0.333983	-0.363484	-1.2947
Adur22775_comp0_c0_seq1|g.13116	0.732238	-0.629002	-0.735116	0.83168	0.663608	-0.418198	1.01296	-0.404593	-0.700487	0.919772	-0.494687	-0.716762
Adur22816_comp0_c0_seq1|g.13141	-0.110242	0.665937	0.345182	0.508487	-0.111551	0.548431	-0.0509829	-1.15923	-0.156727	-0.567735	0.257568	0.0416801
Adur22816_comp0_c1_seq1|g.13142	-0.327728	0.398885	0.561038	0.0929197	-0.0861811	0.391915	-0.163102	-1.1432	-0.0416081	-0.326337	0.424668	0.107899
Adur22859_comp0_c0_seq1|g.13156	0.599753	0.228401	0.604326	0.654256	-0.777943	-0.28995	-0.199038	-0.908066	-0.205052	0.384487	0.23213	-0.179425
Adur23014_comp0_c0_seq1|g.13195	-1.13629	-0.47728	-0.924113	0.559886	-1.13629	-0.761724	0.960084	0.496653	0.0266675	0.985324	0.847554	0.242677
Adur23021_comp0_c0_seq1|g.13197	-0.349128	0.945358	0.728679	0.380753	-0.789919	0.696648	-0.965016	-0.592465	0.700527	-0.794924	0.0524224	0.33177
Adur23110_comp1_c0_seq1|g.13260	1.44341	-0.419595	-0.62319	0.947517	0.424113	-0.588213	-0.232345	0.519942	-0.257836	0.650894	-0.414512	-1.1759
Adur23133_comp0_c0_seq1|g.13278	1.28448	-0.811788	-1.1806	1.01165	0.967245	0.187406	0.369485	-0.176165	-0.89414	0.49623	-0.277969	-1.27987
Adur23155_comp1_c0_seq2|g.13299	1.4865	-0.533463	-0.72288	0.564631	0.977041	-0.160093	-0.150943	0.347033	-0.672555	0.426112	-0.704249	-1.00558
Adur23174_comp0_c0_seq1|g.13321	1.4946	-0.635437	-0.595879	1.44838	0.842632	-0.656741	-0.254598	-0.379497	-0.732324	0.176691	-0.620741	-0.679311
Adur23192_comp2_c0_seq1|g.13337	-0.331136	-0.446058	-0.316869	-0.335885	0.264041	1.24043	-0.115257	-1.07619	-0.304705	-0.296295	0.78056	0.54442
Adur23287_comp1_c0_seq2|g.13397	1.06401	-0.715319	-1.03622	1.15909	0.962968	-0.438037	0.348433	0.403291	-0.888578	0.567397	-0.469343	-1.18902
Adur23311_comp0_c0_seq3|g.13418	0.162774	-0.785135	-0.736845	0.504517	0.478824	-0.342448	1.22788	-0.52546	-0.413899	1.23639	-0.35506	-0.550431
Adur23371_comp0_c0_seq1|g.13460	0.963745	-1.25823	-1.10831	0.195799	0.368999	0.857568	0.447628	0.672618	-0.890452	0.285727	-0.118033	-0.41109
Adur2346_comp0_c0_seq18|g.1376	0.981673	-0.874416	-1.11729	1.39759	0.750535	-0.257344	0.430979	0.31631	-0.435726	0.193031	-0.129164	-1.20449
Adur23476_comp0_c0_seq1|g.13509	-0.809051	0.822864	0.727547	-0.857531	-1.07843	-0.423474	0.255783	-0.065039	1.2193	-0.275877	0.272854	0.498047
Adur23527_comp1_c0_seq9|g.46326	-0.293162	1.00498	0.423066	-0.0797301	-0.882007	1.06144	-0.306113	-0.444811	-0.665275	-0.898818	0.609057	0.694847
Adur23550_comp2_c0_seq2|g.13564	0.553859	-1.0369	-1.1485	0.457117	0.91116	-0.200467	0.590362	-0.0413144	-0.602329	0.757019	-0.0229115	-0.46644
Adur23605_comp0_c0_seq1|g.13603	-0.522825	1.00098	1.32783	-0.69098	-0.696542	-0.674027	-0.152976	-0.0594291	0.59704	-0.291465	0.458639	-0.215921
Adur23612_comp0_c0_seq1|g.13608	1.44128	-0.318579	-0.575071	1.24079	0.629242	-0.628633	0.302553	0.333484	-0.785242	0.616779	-0.712632	-1.49316
Adur2370_comp0_c0_seq4|g.1398	1.23578	-0.819784	-1.14434	1.17716	0.928257	-0.559437	0.404053	0.563761	-0.589964	0.588925	-0.350099	-1.22978
Adur23708_comp0_c0_seq1|g.13659	-1.09869	0.279929	1.06344	-1.34632	-0.426547	0.785528	-0.431109	-0.620761	0.656112	-0.197902	0.746839	1.20261
Adur2372_comp0_c1_seq1|g.1405	0.955996	-1.39515	-0.726921	0.719461	0.811979	0.277721	-0.571734	-0.29993	-0.372368	-0.0822496	0.0668544	0.115644
Adur23744_comp0_c0_seq1|g.13678	-0.0104845	0.857502	0.779924	0.143866	-0.614489	-0.571488	0.177179	-0.302312	-0.0852609	0.181605	0.203555	-0.298983
Adur23808_comp0_c0_seq1|g.13714	-0.89529	0.813687	0.694588	-1.13434	-1.17328	-0.66555	0.562832	0.436588	0.975811	-0.151301	0.502817	0.470082
Adur23837_comp0_c0_seq1|g.13736	1.33476	-0.277057	-0.963708	1.45977	0.796246	-0.600853	-0.0207345	0.306587	-0.300703	0.416355	-0.697409	-1.00789
Adur2385_comp1_c0_seq1|g.1426	0.0156124	-1.92259	-1.29014	0.678014	0.524195	-0.311708	0.0399556	0.293684	-0.211709	1.14972	0.271565	-0.604212
Adur23950_comp0_c0_seq1|g.13785	0.965992	-0.836394	-0.704661	1.15027	0.775484	-0.318115	0.654966	-0.47957	-0.989977	0.617581	-0.772275	-0.801402
Adur24021_comp0_c0_seq1|g.13795	1.18286	-0.28694	-1.1595	0.834638	0.903141	0.125969	0.152531	0.558968	-0.937866	0.175241	-0.452555	-1.21273
Adur24109_comp0_c0_seq1|g.13825	-0.729777	1.16738	1.29861	-0.96128	-0.972622	-0.0984978	-0.42993	0.248319	0.982119	-0.367367	0.147508	0.0486454
Adur2412_comp1_c1_seq2|g.1437	-0.730158	0.952015	0.576608	-0.750039	-1.22522	-0.409836	0.289442	-0.315827	0.931917	-0.117254	0.408289	0.243829
Adur24123_comp0_c0_seq9|g.13832	1.46016	-0.594399	-1.02168	1.05778	1.16081	-0.388778	0.178834	-0.173753	-0.922971	0.715785	-0.65059	-0.922392
Adur24163_comp1_c0_seq1|g.13854	-0.761703	-0.28608	-0.368578	-0.373051	-1.05896	-0.331956	0.657657	-0.290338	0.827282	0.930544	0.727191	0.726382
Adur24268_comp0_c0_seq2|g.13894	1.14244	-1.10591	-0.969203	1.42425	0.890061	0.101954	-0.0629388	-0.441529	-0.687303	0.704268	-0.632526	-0.926699
Adur24314_comp2_c0_seq1|g.13919	-0.67989	-0.150536	-0.728385	-0.477734	0.298912	0.629696	-0.0648224	-1.50095	0.0315618	0.374097	0.819257	0.853724
Adur24338_comp0_c0_seq2|g.13939	-0.657678	0.216419	0.321603	-0.573752	-0.0730021	0.280941	-0.357919	-1.22037	0.255599	-0.33429	0.497002	1.19507
Adur24422_comp0_c0_seq2|g.13983	0.804468	-0.0745943	-0.351179	0.590325	0.764726	0.0285819	0.138461	0.234311	-0.290949	0.576881	-0.931844	-0.758264
Adur24424_comp1_c0_seq1|g.13985	1.15388	-1.15055	-0.978817	1.38038	0.669464	-1.05814	0.0500804	0.278976	-0.184793	0.579149	-0.412194	-1.26954
Adur24480_comp0_c0_seq1|g.14012	-0.319129	1.56583	1.18745	-0.224592	-0.622075	-0.569273	-0.154742	-0.11937	0.459756	-0.582818	-0.121915	0.673752
Adur24496_comp0_c0_seq2|g.14032	1.3613	0.117713	-0.82856	0.878875	1.07301	-0.675658	-0.0954813	0.672448	-0.691842	-0.0415633	-0.643236	-1.06921
Adur24522_comp0_c0_seq1|g.14053	0.500787	-0.299834	-0.283908	0.750961	1.13396	-0.493859	0.163859	0.492377	-0.606198	0.2138	-0.868809	-0.820463
Adur2453_comp0_c0_seq1|g.1467	-0.21131	0.715046	0.722532	0.0294438	-0.962627	-0.884206	0.120585	-0.259495	0.805535	0.199475	0.137118	0.469659
Adur24531_comp0_c1_seq2|g.14069	-0.405321	1.35859	1.08487	-0.384627	-0.650829	-0.552302	-0.133574	-0.426162	0.438257	-0.300282	-0.0832594	1.02686
Adur24533_comp0_c0_seq1|g.14076	-0.218378	1.05416	0.775531	-0.075889	-0.93875	-0.387585	0.368274	0.131055	0.307446	-0.0255745	-0.0489809	-0.19951
Adur24535_comp0_c0_seq4|g.14082	-0.318094	0.94769	0.681415	-0.0725393	-0.764089	-0.518786	0.444386	-0.197028	0.423765	-0.11196	0.192958	-0.317334
Adur24553_comp0_c0_seq1|g.46424	-0.126797	-0.855574	-0.644183	0.570744	0.718523	-0.0659612	0.970023	-0.284105	-0.641433	0.850092	-0.518853	0.0475469
Adur24559_comp0_c0_seq2|g.14102	0.417318	-0.0282434	-0.0036481	0.433357	0.410959	0.922865	-0.375945	-1.60275	-0.773517	-0.194283	-0.192392	0.991293
Adur24560_comp0_c0_seq1|g.14103	-0.880545	0.807681	0.62942	-1.2563	-1.05443	-0.754592	0.432323	1.10718	0.831303	-0.0211732	0.537196	0.249539
Adur24612_comp1_c0_seq1|g.14148	0.237647	1.2356	0.735333	-0.0434307	-0.959849	-0.75232	0.144903	0.384132	0.564305	-0.0814468	0.0581743	-0.424546
Adur24672_comp0_c0_seq1|g.14201	-0.665308	0.625801	0.487341	-0.174863	-0.658277	-0.435431	0.987482	-0.327439	0.122032	-0.465038	0.315513	0.435663
Adur24813_comp0_c0_seq1|g.14284	0.412202	1.40038	1.26628	0.636866	-0.319297	-0.379903	0.0532693	-0.838787	-0.298685	-0.112066	-0.356477	-0.251251
Adur24835_comp1_c0_seq2|g.14297	-1.19065	1.0107	0.682495	-1.21724	-0.8162	0.440636	-0.759342	0.250907	0.814654	-0.790204	0.597183	0.921716
Adur24839_comp0_c0_seq2|g.14303	0.85767	0.940673	-0.0828759	0.364487	0.337383	-0.780962	0.272141	-1.10007	-0.169961	-0.138299	-0.0563731	-0.577839
Adur24849_comp0_c0_seq1|g.14308	-1.11616	0.880986	1.06712	-0.643594	-1.22296	-0.273239	0.812936	-0.160128	0.636813	0.152566	0.240675	0.641877
Adur24899_comp0_c0_seq1|g.14347	-0.382311	1.32226	0.606072	-0.493846	-0.678099	0.0281785	-0.589868	-0.0962248	0.435477	-0.164213	0.551647	0.536065
Adur24905_comp0_c0_seq2|g.14348	-0.123683	0.645017	0.77406	0.56647	-0.762719	-0.196858	0.371562	-0.925404	0.317863	0.210707	0.0603698	-0.00206946
Adur24919_comp0_c0_seq1|g.14353	-1.05354	1.59826	0.557942	-0.333002	-0.975608	-0.208263	0.433126	0.39641	0.470444	-0.171132	0.0856917	0.170184
Adur24921_comp0_c0_seq1|g.46476	-1.14475	0.101143	-0.209656	-0.468593	-0.299619	1.06403	0.915174	-0.978046	0.436426	0.405695	0.335879	0.539029
Adur2497_comp0_c0_seq2|g.1499	1.11428	-0.733642	-1.51963	1.51558	0.796704	-0.194662	0.384838	-0.0749552	-0.537724	0.65341	-0.202913	-1.08881
Adur24988_comp1_c0_seq2|g.14401	0.841889	-0.808396	-0.924466	0.731252	1.03537	-0.0390377	1.04532	-0.0810863	-0.92821	0.670115	-0.833372	-1.0692
Adur25016_comp0_c0_seq2|g.14413	1.43687	-1.15611	-1.08237	1.22596	0.83669	-0.135472	0.358449	-0.0370859	-0.962194	0.421508	-0.468385	-0.955065
Adur25017_comp0_c0_seq2|g.14414	0.5606	-0.873093	-0.686547	1.23629	1.08493	-0.448824	0.533553	0.0236431	-0.8972	0.450284	-0.0122555	-0.512222
Adur25098_comp0_c0_seq2|g.14454	-0.312516	0.684665	0.856801	-0.406816	-0.634633	-0.736095	0.226388	-0.413104	0.28826	0.00829652	-0.00864191	0.948921
Adur2510_comp0_c0_seq3|g.44164	0.107605	1.38879	0.5654	0.222898	-0.740525	-0.413862	-0.348867	-0.175446	0.239795	0.152625	0.526419	-0.00411066
Adur25110_comp0_c0_seq1|g.14464	0.34138	-0.872171	-0.841947	0.719348	0.463517	-0.341951	1.10583	-0.47571	-0.34683	1.00775	-0.443511	-0.50722
Adur25219_comp2_c0_seq2|g.14486	0.313444	-0.698659	-0.889858	0.0382842	1.10613	0.230983	-0.167159	0.157193	-0.46723	0.653893	-0.380898	-0.927557
Adur2525_comp0_c0_seq1|g.1527	0.956181	0.216552	-0.553473	1.33192	0.828906	-0.690904	0.124578	0.328946	-0.362354	0.531404	-0.903993	-1.32145
Adur25250_comp1_c0_seq1|g.14504	0.886968	-0.456593	-1.04316	0.725302	1.14427	-0.0989373	-0.0646941	0.331013	-0.572053	0.367095	-0.611284	-1.48894
Adur25343_comp1_c0_seq2|g.14549	0.834718	-0.98481	-0.735935	1.01016	0.891546	-0.12558	0.169007	-0.0865989	-1.03877	1.01541	-0.330262	-0.999692
Adur25402_comp0_c0_seq1|g.14588	0.250211	-0.590108	-0.649178	1.10498	0.609649	-0.649661	1.10147	-0.0708494	-0.664234	0.83958	-0.548735	-0.758294
Adur25444_comp1_c1_seq1|g.14618	0.391546	-0.622079	-0.555677	0.288315	1.1237	0.992148	-0.606867	-0.0487075	-0.815829	0.337083	-0.495124	-0.605264
Adur25501_comp0_c0_seq1|g.14658	-0.420967	0.596985	1.02686	-0.360836	-1.19097	-0.443602	0.755282	0.0886919	0.640956	0.0231592	0.351261	-0.17366
Adur25518_comp1_c0_seq2|g.14661	0.777126	-0.626444	-0.460582	1.21634	1.14215	0.687381	0.163806	-0.895171	-0.755873	-0.0478619	-1.06876	-0.76734
Adur25642_comp0_c0_seq5|g.14711	-0.875167	0.787165	0.350018	-0.726128	-1.13645	-0.19624	0.60147	-0.0938299	0.733847	0.0292115	0.657586	0.499428
Adur25661_comp0_c0_seq1|g.14718	-0.134824	0.316003	0.0300238	-0.424474	-0.653912	-0.409325	0.503205	0.0147979	-0.0344143	0.105104	0.575621	0.105217
Adur25745_comp0_c0_seq1|g.14777	0.466251	-1.11335	-1.05976	0.827255	1.20551	-0.0592895	0.18037	-0.195281	-0.666668	0.687389	-0.461713	-0.877177
Adur25775_comp1_c0_seq1|g.14788	-0.412596	1.2325	0.0374556	-0.742004	-1.27838	-0.912909	0.563172	0.0792193	0.749831	0.0883693	0.657285	0.325173
Adur25809_comp0_c0_seq2|g.14822	0.838855	-0.256585	-0.984199	0.859549	1.15538	-0.173897	-0.211268	0.383121	-0.77745	0.389841	-0.682879	-1.02401
Adur25824_comp0_c0_seq1|g.14839	1.02661	-0.735389	-0.813476	1.38732	1.30547	-0.0215751	-0.439944	-0.383871	-0.729951	0.267155	-0.580016	-0.75252
Adur25836_comp0_c0_seq1|g.14847	-0.686567	0.889444	0.964266	-0.899147	-0.943762	-0.858846	0.00664749	0.255297	1.04669	-0.242051	0.324649	0.519019
Adur25838_comp0_c0_seq1|g.14848	-0.712416	0.923032	1.11944	-1.05449	-0.98993	-0.71415	0.0382955	0.240854	0.95807	-0.310762	0.309649	0.54699
Adur25839_comp0_c0_seq1|g.14850	-0.473779	1.06568	1.07849	-0.937797	-0.629674	-0.783571	-0.210634	0.0273102	1.00238	-0.266926	0.0809973	0.390003
Adur25848_comp0_c0_seq1|g.14856	1.07374	-0.712209	-1.42688	1.1117	0.668323	0.210727	0.225194	0.434357	-0.8895	0.482474	-0.232097	-0.940668
Adur25865_comp0_c0_seq24|g.14870	-0.429166	1.46552	1.32926	-0.479734	-0.778911	0.403472	-0.455467	-0.339311	-0.0918259	-0.645466	-0.191501	0.633394
Adur25868_comp2_c0_seq5|g.14873	-0.00860651	1.85066	0.994442	-0.324982	-0.544551	-0.258002	-0.473396	0.168432	0.32066	-0.811042	0.22685	-0.311632
Adur25914_comp0_c0_seq3|g.14897	0.211131	-0.520985	-0.457954	-0.573502	-0.260359	-0.69373	-0.412565	1.8816	0.187741	0.0978729	0.212954	-0.506534
Adur25922_comp0_c0_seq1|g.14906	-0.874549	0.437057	1.09074	-0.463442	-0.499592	0.622346	0.057037	-0.561503	-0.339436	-0.588519	0.41161	0.399184
Adur25937_comp0_c0_seq1|g.14916	-0.353071	0.730676	0.567121	-0.578573	-0.840306	-1.19232	0.523798	0.28011	0.600274	-0.322049	0.320621	0.510385
Adur25951_comp0_c0_seq1|g.14924	0.803022	-0.791043	-0.967167	1.15648	0.902917	0.203902	0.487275	-0.279808	-1.1927	0.573465	-0.625679	-0.6597
Adur25955_comp0_c0_seq17|g.14927	-0.729067	0.293872	0.635918	-0.695871	-0.106189	1.15498	-0.616706	-1.08127	-0.256609	-0.593635	0.69541	1.12015
Adur25990_comp0_c0_seq18|g.14951	0.805807	-1.07431	-1.34828	0.73986	0.942716	0.173603	0.621035	0.00133538	-0.80474	0.418481	-0.282736	-0.970202
Adur26073_comp0_c0_seq2|g.14962	1.29566	-0.422849	-1.10407	1.12919	0.985236	-0.120729	-0.189224	0.414394	-0.878443	0.560748	-0.660347	-1.02022
Adur26145_comp0_c0_seq1|g.15022	1.39319	-0.336366	-0.864275	1.32031	1.14044	-0.438493	0.228862	0.263124	-0.94928	0.231397	-0.738584	-1.11563
Adur26175_comp0_c0_seq2|g.15036	0.361985	1.33663	-0.934352	0.643036	-0.435797	0.106146	1.00268	-0.203765	-0.643197	-0.545936	0.421867	-0.206706
Adur26221_comp0_c0_seq1|g.15050	-0.200743	0.424348	0.690408	-0.146139	-0.501166	-0.333581	-0.068975	-0.347263	0.110657	-0.146253	0.502728	0.0648405
Adur26267_comp0_c0_seq3|g.15073	1.12517	-0.952768	-1.43257	1.32768	0.864402	0.122419	0.635878	-0.412874	-0.882846	0.494458	-0.268319	-0.801386
Adur26326_comp0_c0_seq1|g.15087	1.96604	-0.45993	-0.646635	1.4023	0.586826	-0.408423	-0.26284	-0.583736	-0.628813	0.0196926	-0.685852	-0.739383
Adur2635_comp0_c0_seq1|g.1636	-0.835365	0.96473	0.411808	-1.12787	-0.465618	0.315048	-0.200282	-0.504459	0.0187831	-0.685497	0.471035	1.59941
Adur26361_comp2_c0_seq23|g.15101	0.853538	0.110456	-0.994403	0.898833	0.819613	-0.272594	0.382029	0.313974	-0.281195	0.850206	-1.05113	-1.43737
Adur26362_comp3_c0_seq2|g.15103	-0.916868	0.836059	0.516468	-0.876554	-0.972506	-0.6845	0.995957	0.53563	0.377007	-0.0664658	0.538298	0.361122
Adur26396_comp0_c0_seq6|g.46614	-1.22167	1.47326	1.06547	-0.778706	-0.447593	0.213577	-0.260573	-0.158702	0.374001	-0.872771	0.366873	0.625646
Adur26445_comp0_c0_seq2|g.15127	-1.49252	-0.16495	-0.201646	-1.51624	-0.794331	0.812397	0.327222	0.11732	0.897127	-0.222692	0.859462	0.950554
Adur26461_comp0_c0_seq1|g.15131	0.307183	-0.76005	-1.22832	1.06058	1.15608	-0.203328	0.373883	-0.407044	-0.475967	0.697934	-0.535515	-0.922701
Adur26504_comp0_c0_seq1|g.15144	0.271332	0.663647	0.709555	0.524015	0.0202653	0.599136	-0.115147	-1.29685	-0.230595	-0.129102	0.126511	-0.748488
Adur26510_comp0_c0_seq4|g.15148	-0.185295	1.23345	0.960901	0.054939	-0.605292	-0.494433	0.138678	-0.407524	0.286975	-0.300388	-0.0454063	0.234221
Adur26511_comp0_c0_seq1|g.15149	1.25116	-0.556537	-1.05826	1.35824	0.967712	-0.2934	0.24289	-0.172112	-0.743084	0.712528	-0.602174	-1.082
Adur26513_comp0_c0_seq1|g.15150	-0.0390181	0.906808	0.838416	-0.00168313	-0.476067	-0.621384	-0.0256197	-0.259249	0.201849	-0.250088	0.195287	-0.163228
Adur26534_comp0_c0_seq5|g.15165	1.37133	-0.338452	-1.24364	1.30315	0.589905	-0.79021	0.502404	0.414387	-0.526555	0.7502	-0.489177	-1.07104
Adur26624_comp0_c0_seq1|g.15195	-0.844373	0.798968	0.589104	-0.739033	-1.13077	0.344773	0.251202	0.419202	0.583043	-0.663028	0.428231	1.06911
Adur26687_comp0_c0_seq1|g.15217	-0.621672	1.38594	1.32315	-0.878649	-0.603487	-0.51394	-0.128056	0.60144	0.603453	-0.602759	0.0725347	0.49252
Adur26689_comp0_c0_seq1|g.15219	1.19195	-0.891588	-1.13991	1.17555	0.790014	-0.584035	0.271148	0.426587	-0.701786	0.548067	-0.263463	-1.38821
Adur26698_comp0_c0_seq4|g.15226	-1.09941	1.4369	1.36578	-0.996198	-0.848259	-0.014269	-0.0349695	0.011854	0.494704	-0.480399	0.193443	0.588868
Adur26755_comp0_c0_seq2|g.15238	1.00547	0.0588709	-0.982761	0.931989	0.688027	-0.31856	0.255885	0.553868	-0.31051	0.672136	-0.87227	-1.16748
Adur26818_comp1_c0_seq1|g.15279	0.19244	-1.04977	-0.968608	0.485388	0.772501	-0.330312	0.728155	0.836468	-0.841117	0.516012	-0.278282	-0.806232
Adur2688_comp0_c0_seq1|g.1674	1.01252	-0.216183	-0.71729	1.25323	1.42642	0.129188	-0.521024	-0.738191	-0.732556	0.0563468	-0.714168	-0.571806
Adur26964_comp0_c0_seq1|g.15333	-0.674436	1.03384	0.496022	-0.300418	-1.0636	-0.322802	0.0143683	0.19735	0.36097	-0.622855	0.351228	0.598836
Adur26966_comp0_c0_seq4|g.15337	1.66312	-1.20995	-0.965802	1.26189	0.624377	-0.0131911	0.119862	0.193627	-0.767554	-0.407192	0.107588	-0.79944
Adur26999_comp0_c0_seq2|g.15360	0.966748	-0.692777	-0.850949	1.04223	1.16618	0.213865	-0.0356466	-0.551729	-0.802709	0.370644	-0.663356	-0.912619
Adur27133_comp0_c0_seq1|g.15425	0.332755	-0.555199	-0.555199	0.992105	0.861861	0.0953281	-0.0105906	0.0153216	-0.555199	0.0758678	-0.46481	-0.421829
Adur27160_comp0_c0_seq1|g.15448	1.04058	-1.06337	-1.08455	1.6954	0.995652	-0.350959	0.325513	-0.192706	-0.979832	0.0324672	-0.312122	-0.885612
Adur27213_comp0_c1_seq1|g.15466	-0.272173	0.706593	0.642709	-0.295897	-0.0905731	0.221252	-0.320767	-1.17623	0.142689	-0.370528	0.354888	0.121025
Adur2722_comp0_c0_seq1|g.1702	1.44662	-0.451611	-1.03011	1.04051	1.02925	-0.456926	-0.0225752	-0.105384	-1.06461	0.817454	-0.708299	-0.753848
Adur27262_comp0_c0_seq5|g.15479	-0.84532	0.548809	1.06045	-1.20196	-0.63426	0.585631	-0.450518	-0.438363	0.604355	-0.874908	0.794666	0.397274
Adur27343_comp0_c0_seq2|g.15513	0.13455	1.06323	0.232151	-0.079198	-0.682483	0.135998	0.195947	-0.236412	-0.530258	0.0639492	0.577308	0.363226
Adur27352_comp0_c0_seq1|g.15518	-0.702177	0.656743	0.812629	-0.113589	-1.07187	-0.756336	0.49459	-0.873166	0.186266	0.0593631	0.328467	0.761399
Adur27390_comp0_c0_seq1|g.15541	1.03194	-0.726295	-0.830176	0.963358	0.986891	0.0824835	0.0697373	-0.470755	-0.730448	0.538709	-0.602014	-0.592646
Adur27397_comp0_c0_seq2|g.15545	1.08832	-0.361632	-1.26512	1.22123	0.929421	-0.481903	0.128112	0.305007	-0.605949	0.679775	-0.360549	-1.09309
Adur27420_comp0_c0_seq1|g.15558	1.10254	-1.02937	-0.976832	0.989033	1.05372	0.556206	0.0127975	-0.644674	-0.928221	0.44875	-0.417062	-0.510337
Adur27439_comp0_c0_seq4|g.15575	0.221654	-1.5694	-1.48513	-0.0982452	0.720676	0.671258	0.241337	0.410932	-0.215402	0.492024	0.198775	-0.505159
Adur27464_comp0_c0_seq1|g.15596	0.705617	-0.93091	-1.41582	-0.193944	0.363876	-0.420656	0.417877	1.48273	-0.253682	0.453446	0.0711158	-0.125065
Adur27494_comp1_c0_seq2|g.15612	-0.437481	1.07371	0.749071	-0.083797	0.153273	0.11241	0.812654	-0.687128	-0.413851	-0.985418	0.257845	-0.757398
Adur27550_comp1_c0_seq1|g.46707	0.0926082	-0.807175	-1.10918	0.524273	0.759918	0.571106	1.06079	0.384691	-0.942166	0.310116	-0.191873	-1.14772
Adur27598_comp0_c0_seq3|g.15667	1.13184	-0.894713	-1.58782	1.03018	0.982754	-0.0307878	0.327681	-0.345478	-0.762351	0.503081	-0.322183	-0.652499
Adur2760_comp0_c0_seq3|g.1725	0.229797	1.04749	0.535466	0.76191	-0.36033	-0.304759	0.156268	-0.281812	-0.251956	-0.243221	-0.0923311	-0.576427
Adur27670_comp0_c0_seq2|g.15738	0.743619	-0.336182	-0.736226	0.903123	1.12996	-0.155834	-0.376357	0.425636	-0.426901	0.707691	-0.739064	-1.34286
Adur27708_comp1_c0_seq7|g.15765	-0.556554	0.187273	-0.167471	-0.338576	-0.813451	0.709789	0.384953	-0.899621	0.87943	0.144735	0.305623	0.588346
Adur27709_comp0_c0_seq3|g.15766	0.87478	-0.196002	-0.973686	1.17208	1.18599	-0.225159	0.304435	0.133227	-0.334692	0.484474	-0.789376	-1.53598
Adur27730_comp1_c0_seq1|g.15780	1.04407	-0.259105	-0.957834	1.35893	0.910475	-0.448774	0.349276	0.161018	-0.61753	0.622865	-0.699796	-1.12183
Adur27733_comp0_c0_seq11|g.15782	1.27546	-0.618152	-0.853453	1.18616	1.12577	-0.139855	0.00973678	-0.162398	-0.998639	0.476708	-0.643064	-0.975023
Adur27775_comp1_c0_seq5|g.46727	-0.542764	1.2419	1.10395	-1.14422	-1.08813	-0.680094	0.0764604	0.493943	0.573219	-0.505068	0.11348	0.436488
Adur278_comp2_c0_seq2|g.180	-0.215304	1.11362	0.133724	-0.277602	-0.720292	-1.10221	-0.0533556	0.220382	0.868381	-0.385256	0.136463	1.00311
Adur27857_comp1_c0_seq3|g.15887	1.26024	-0.639382	-1.03545	1.51936	0.973079	-0.258502	0.121471	-0.381723	-0.665004	0.534883	-0.599231	-1.48745
Adur27935_comp0_c0_seq1|g.15903	0.771243	-0.811984	-0.9841	1.08597	1.14297	-0.399254	0.369588	-0.413513	-1.08499	0.446167	-0.389935	-0.209743
Adur2797_comp0_c0_seq2|g.1750	-0.271727	1.11208	1.67404	-0.661959	-0.4946	-0.178811	-0.340612	-0.515152	0.213729	-0.307223	-0.0261527	-0.33243
Adur280_comp1_c0_seq1|g.182	0.620974	-0.624424	-0.945641	1.09237	0.921364	-0.268852	0.169004	-0.100842	-0.704046	0.509213	-0.710384	-0.367326
Adur2801_comp0_c0_seq1|g.1752	-0.815535	1.08937	1.02743	-0.809634	-0.850751	-0.468485	-0.173958	0.354839	0.95665	-0.338432	0.322561	0.470167
Adur28015_comp0_c0_seq1|g.15938	0.987555	-0.9761	-1.03558	0.825731	1.10684	0.397136	0.208844	0.0205122	-1.19136	0.221441	-0.0517331	-0.864782
Adur28036_comp0_c0_seq1|g.15951	0.445343	1.39461	0.968679	0.528815	-0.454029	-0.811575	-0.125635	-0.479683	0.0893798	-0.45094	-0.247811	-0.36876
Adur28078_comp0_c0_seq1|g.15974	0.491677	-0.745999	-0.589661	1.02172	0.529143	-0.0938843	-0.295605	-0.394913	-0.531844	0.543806	-0.500872	-0.475547
Adur28084_comp1_c0_seq2|g.15978	-1.15953	0.841786	0.422143	-1.14462	-1.03435	0.0165187	0.225374	0.366696	0.427505	-0.287914	0.693003	0.925044
Adur2810_comp0_c0_seq5|g.1759	-0.779348	0.0977845	0.505159	-0.0268257	-0.637104	0.982722	0.543407	-1.38173	-0.00747491	0.0882889	0.393394	0.377565
Adur2811_comp0_c0_seq1|g.1761	-0.744567	0.758502	0.374094	-0.838874	-0.494579	0.285493	-0.266007	0.0673616	0.757405	-0.639107	0.706198	0.635783
Adur28164_comp0_c0_seq1|g.16024	0.678514	-1.12282	-0.499189	0.818711	0.661986	-0.198425	0.892796	-0.273528	-0.614347	0.927906	-0.646818	-0.7751
Adur28196_comp0_c0_seq1|g.16038	-0.846615	0.497336	1.36417	-0.675563	-1.00415	-0.0495638	-0.147471	-0.845446	0.960056	-0.388692	0.40584	0.876822
Adur2827_comp1_c0_seq2|g.44200	1.01511	-0.408698	-1.37557	0.961211	0.559226	-0.615823	0.514791	0.749508	-0.418242	0.796382	-0.478666	-1.09198
Adur28312_comp0_c0_seq8|g.16079	-0.717939	1.17374	0.442348	0.149757	-0.767604	-0.436077	0.745625	-0.645056	0.393295	-0.0489064	0.291446	0.871252
Adur28377_comp0_c0_seq4|g.16116	0.436213	1.56727	0.317072	0.722302	-0.415571	-0.342355	-0.416713	-0.134025	0.198378	-0.411756	-0.0742232	0.192117
Adur28378_comp0_c0_seq1|g.16120	-0.618268	0.430352	0.943353	-0.862138	-1.13855	-0.422272	-0.128608	0.372031	0.949364	0.146418	0.402723	0.62715
Adur28381_comp0_c0_seq1|g.16123	-0.706783	0.800674	1.23353	-0.39114	-1.057	-0.159393	-0.067221	-0.809885	1.15786	-0.0147851	0.20802	0.720197
Adur28453_comp0_c0_seq2|g.16162	-0.827149	0.428656	0.972152	-0.958363	-0.794561	0.604164	-0.376672	-0.400251	-0.0114194	-0.334298	0.545849	0.627675
Adur28514_comp0_c0_seq1|g.16182	1.28929	-0.517191	-0.79722	1.5369	1.07557	-0.649577	0.245253	-0.250912	-0.79722	0.360407	-0.580911	-0.690975
Adur28579_comp1_c0_seq3|g.16239	-1.0544	1.05704	0.81613	-1.2995	-1.12289	-0.381725	-0.00327758	0.311217	1.01685	-0.181789	0.466229	0.75302
Adur28602_comp0_c0_seq1|g.46795	0.979979	-0.840331	-0.808978	1.18355	0.98555	0.146511	0.389677	-0.0523519	-1.44377	0.52158	-0.32869	-1.17723
Adur28625_comp0_c0_seq3|g.16266	0.682761	-0.72502	-1.39105	1.00303	1.08892	-0.306948	0.213963	0.330852	-0.250692	0.493095	-0.25278	-1.16354
Adur28635_comp0_c0_seq1|g.16274	-0.660643	1.16217	1.12884	-0.834476	-0.869731	-0.515383	-0.509625	0.0735979	0.956586	-0.399828	0.428674	0.852828
Adur28694_comp1_c0_seq1|g.46809	-0.746801	1.11194	0.726811	-0.381302	-1.32911	-0.241047	0.278486	-0.0269739	0.659298	-0.0131341	0.0552566	0.662127
Adur2876_comp0_c0_seq3|g.1813	1.00637	-0.667434	-1.3632	1.04823	1.08062	0.0481373	-0.138996	-0.160673	-0.368916	0.315523	-0.432422	-0.876391
Adur28779_comp0_c0_seq10|g.16377	0.409667	0.3883	-0.555669	0.456835	0.912752	0.932401	0.293944	-1.48015	-1.09336	-0.406212	0.67987	-0.0610183
Adur28780_comp0_c0_seq27|g.16379	0.394442	-0.387337	-0.948916	0.598008	1.37317	-0.149476	0.0178702	0.0534372	-0.678296	0.284694	-0.731928	-1.15498
Adur28809_comp0_c0_seq1|g.16413	0.480187	-0.985616	-1.19996	0.811301	0.940031	0.33246	0.619579	-0.812487	-0.758076	0.636512	-0.448248	-0.217623
Adur28812_comp0_c0_seq1|g.16415	0.719207	-0.728952	-1.24321	1.07094	0.605894	-0.158625	0.403469	0.304055	0.0411198	0.689644	-0.616323	-1.68583
Adur28827_comp0_c0_seq2|g.16425	0.936029	-0.0117297	-0.535927	0.878351	0.968693	-0.312574	0.345947	0.253811	-1.04951	0.313072	-0.839544	-0.926573
Adur28851_comp0_c0_seq1|g.46829	-0.642138	0.648121	0.590289	-0.557307	-1.13903	-1.03292	0.657655	0.57495	0.691766	0.230703	0.546745	0.340377
Adur28896_comp0_c0_seq1|g.16457	0.679486	-0.624388	-0.74176	0.843279	0.696519	-0.458032	1.05445	-0.573168	-0.618725	0.951312	-0.618395	-0.616757
Adur28904_comp0_c0_seq2|g.16468	1.0691	-1.0382	-1.05103	0.785756	0.906167	-0.243781	0.725464	-0.497007	-0.715608	1.13348	-0.513283	-0.742028
Adur28953_comp1_c0_seq1|g.16514	0.00985134	1.01464	-0.36699	0.335993	-0.692223	-0.274776	0.387141	-0.186288	0.170605	0.0883468	0.465324	-0.144831
Adur28963_comp0_c0_seq1|g.16521	-0.820238	1.17317	0.989557	-0.721826	-1.05887	-0.772968	0.296872	0.538483	0.817206	-0.115759	0.203176	0.33994
Adur28971_comp0_c0_seq1|g.16529	1.15446	0.0791758	-0.778612	0.505651	1.23414	0.449667	-0.887745	0.0976981	-0.332631	-0.750415	-0.668462	-0.494497
Adur28996_comp0_c0_seq1|g.16533	-0.567784	0.954611	0.306394	-0.966716	-1.01563	-0.415794	0.801857	0.349005	0.036685	-0.119104	0.46745	0.384731
Adur29035_comp0_c0_seq1|g.16563	-0.00654317	1.58864	1.26065	0.129011	-0.644616	-0.410675	-0.697598	-0.0115503	0.402653	-0.482448	-0.159074	-0.0335557
Adur29036_comp0_c0_seq2|g.16565	0.0750351	0.0716821	0.297493	0.425272	0.215619	0.667696	0.262775	-1.45056	-1.12215	0.258711	0.463127	-0.310262
Adur29205_comp0_c0_seq1|g.16626	1.19006	-1.06677	-0.623101	1.17351	1.2092	-0.383122	0.0597165	-0.163247	-0.672321	0.667552	-0.53468	-0.823975
Adur29206_comp1_c0_seq1|g.16627	1.00265	-0.709591	-0.84146	1.03281	1.16927	-0.550455	0.210436	0.283504	-0.727722	0.798139	-0.706474	-0.975843
Adur29347_comp1_c0_seq4|g.46885	0.640117	-0.835723	-1.38449	0.514502	0.680666	0.06337	0.676458	0.936755	-0.875322	0.668875	-0.294364	-0.499765
Adur29368_comp0_c0_seq2|g.16745	1.21225	-0.116106	-0.721459	1.40652	0.814557	-0.698716	0.252678	0.551946	-0.758493	-0.113158	-0.425793	-1.20311
Adur29396_comp0_c0_seq1|g.16763	-0.673964	1.14444	1.2345	-0.346005	-0.497094	0.674759	0.405562	-1.2834	-0.0500818	-0.0382099	0.193329	0.301241
Adur29473_comp0_c0_seq1|g.16805	-0.638472	0.854852	0.71846	-0.792929	-1.34587	-0.695664	0.325031	0.740944	0.810303	-0.239875	0.382457	0.655631
Adur2950_comp0_c0_seq1|g.1858	1.12748	-0.896214	-0.746785	1.01083	1.40054	0.0537825	-0.79076	0.163343	-0.346646	0.366106	-0.496403	-0.868422
Adur29532_comp0_c0_seq3|g.16836	-0.603899	0.841196	0.5258	-0.816055	-0.593367	0.0903804	-0.758382	-0.0867271	0.813562	-0.662409	0.506193	0.607176
Adur29541_comp0_c0_seq1|g.16840	-1.03546	1.63282	0.129781	-0.93995	-0.548869	-0.637879	-0.230562	0.713481	0.845161	-0.210593	0.270276	0.826684
Adur29547_comp0_c0_seq1|g.16846	0.384949	-1.59256	-0.737717	0.248963	-0.135039	-0.555866	0.103416	0.373964	-0.11481	0.700286	0.148621	0.444884
Adur29566_comp0_c0_seq2|g.16861	1.20042	-1.03573	-1.08903	1.21057	0.779405	-0.128637	0.78903	-0.228633	-0.770434	0.655455	-0.458259	-1.11479
Adur29576_comp0_c0_seq4|g.16864	1.06956	-0.664514	-0.703575	1.17579	0.846679	-0.580718	-0.0914625	0.0768502	-0.641999	0.487299	-0.638262	-1.14561
Adur29579_comp1_c0_seq1|g.16869	0.943946	-1.02502	-1.06976	1.60561	0.845741	-0.0535327	0.412475	-0.151862	-0.883395	0.475	-0.417684	-0.994488
Adur29584_comp0_c1_seq1|g.16877	1.07445	-0.805264	-1.28159	1.12257	0.914659	0.225459	0.386928	-0.156384	-0.720961	0.494389	-0.278073	-1.24869
Adur296_comp0_c0_seq1|g.195	-0.761729	0.925461	0.365837	0.0126595	-0.364373	-0.174085	-0.0736077	-0.595126	0.492672	-0.875883	-0.182373	1.21651
Adur29683_comp1_c0_seq1|g.16920	-0.802191	1.06743	1.28132	-0.821386	-1.14845	-0.501117	0.219207	-0.175475	0.81612	-0.256689	0.18667	0.809619
Adur29693_comp0_c0_seq1|g.16925	0.0462135	-0.609131	-0.556176	0.660508	1.23631	0.37449	-0.446273	0.34252	-1.23653	0.92137	-0.0381109	0.0184803
Adur29727_comp0_c1_seq2|g.16948	-0.397637	-0.226893	-0.442091	-0.313241	0.984549	1.13917	-0.276156	-1.17738	-0.75368	-0.319732	0.42422	1.05691
Adur298_comp1_c0_seq1|g.197	1.0335	-0.233543	-0.984245	0.614609	0.988972	0.17877	0.616847	0.486402	-0.97717	-0.197872	-0.655953	-0.944075
Adur2985_comp0_c0_seq9|g.1891	-0.474501	1.63354	1.45737	-0.295342	-0.777251	-0.148277	-0.183578	0.0798345	0.0424899	-0.837975	0.0314943	0.0844519
Adur29881_comp1_c0_seq3|g.17000	-0.651484	1.64491	1.25497	-0.425279	-0.925911	-0.437263	-0.0861771	0.0472542	-0.10635	-0.568842	0.33854	0.518576
Adur29897_comp0_c0_seq2|g.17004	1.14741	-1.10076	-0.869085	1.12876	0.723615	-0.09344	-0.0168589	-0.200371	-0.654061	0.308807	-0.640902	-0.53804
Adur29985_comp0_c1_seq1|g.17040	-0.347873	-0.269911	1.20661	-0.026729	-0.920109	0.342003	0.0184599	-0.333253	-0.0122015	-0.218201	0.537807	-0.35535
Adur30023_comp0_c0_seq2|g.17073	-0.272098	1.06272	0.894076	-0.297975	-0.798255	-0.965541	0.331055	0.0816631	0.737727	-0.0263181	-0.00553156	0.382808
Adur30121_comp3_c0_seq4|g.17150	1.18856	-0.293083	-0.681608	0.860629	0.703095	-0.326147	0.271481	0.354449	-0.730674	0.625138	-0.619519	-1.34961
Adur30128_comp0_c1_seq1|g.17161	0.906577	-0.766061	-0.898731	1.31763	0.795168	-0.510304	0.62614	-0.100588	-0.91429	0.732007	-0.551624	-1.12311
Adur30134_comp1_c0_seq1|g.17163	1.38301	-0.632808	-0.909045	1.43701	0.836012	-0.516916	0.330078	-0.208389	-0.701955	0.473002	-0.700616	-0.980989
Adur3014_comp0_c0_seq3|g.1932	0.78275	-0.889706	-0.817401	0.839361	0.402434	0.225824	0.0112214	0.276221	-0.626555	0.201065	-0.447266	-0.910435
Adur30193_comp0_c0_seq1|g.46970	0.800605	-1.2205	-1.0139	0.753526	1.05498	0.158876	0.51528	0.0312089	-0.672207	0.165869	-0.283603	-0.531868
Adur3025_comp0_c0_seq1|g.1939	0.294221	-0.677982	-0.684986	0.933911	0.505358	-0.151808	1.1202	-0.315581	-0.651662	0.529084	-0.541514	-0.458946
Adur303_comp1_c0_seq2|g.201	1.05502	0.00279052	-0.924105	0.571666	0.993785	0.0164478	0.653622	0.475456	-1.25072	-0.0623159	-0.622574	-0.889501
Adur30317_comp0_c0_seq1|g.17249	1.28162	-0.579749	-1.42615	0.966626	0.769674	0.329925	-0.165465	0.0612648	-0.628627	0.452191	-0.716289	-0.926429
Adur30356_comp0_c0_seq1|g.17287	-0.902518	1.4953	1.06115	-1.28861	-1.36513	0.540425	0.0426048	0.38435	0.204706	-0.296272	0.219291	0.671669
Adur30385_comp0_c0_seq4|g.17312	-0.162208	0.65125	1.17784	0.142105	-0.184934	0.806929	0.0549957	-1.45503	-0.779331	-0.63887	0.0145521	0.16417
Adur30396_comp5_c0_seq8|g.17324	1.33066	-0.765408	-0.631838	1.28619	0.902477	-0.768813	0.515835	-0.00928376	-0.775689	0.661693	-0.528438	-1.01935
Adur30418_comp0_c0_seq1|g.17351	0.500993	0.568164	-0.471991	0.778016	-0.42128	-0.430934	0.288474	-0.432256	-1.12019	0.497151	0.331285	0.0813466
Adur30440_comp1_c0_seq3|g.17368	-0.249442	1.26948	0.54407	-0.275495	-1.04467	-0.3698	0.316673	0.205895	0.591975	-0.0566408	0.205349	0.598058
Adur30470_comp0_c0_seq2|g.17390	-0.285828	1.49056	1.08669	-0.576411	-0.348513	-0.934732	-0.429451	0.11361	0.429287	-0.275048	0.085532	0.0978401
Adur30476_comp1_c0_seq3|g.17393	-0.85554	0.876772	0.640864	-0.254093	-0.586521	-0.0933085	0.149626	-0.368989	0.0551543	-0.472769	0.813329	-0.205495
Adur30535_comp1_c0_seq2|g.17432	0.339342	-0.627593	-1.06332	0.725485	0.939746	-0.775761	0.452109	0.210404	-0.543764	0.960788	-0.254275	-0.512523
Adur30553_comp0_c0_seq1|g.17446	-0.336658	0.57912	-0.10205	-0.139341	1.09058	1.15439	-1.13279	-1.2196	-0.647247	-0.672149	0.404064	1.02767
Adur30580_comp2_c0_seq1|g.17471	-0.530934	0.452008	1.48304	0.0658653	0.771301	0.623217	-0.658001	-1.24382	-0.91598	-0.808752	-0.342157	0.708081
Adur30598_comp1_c0_seq11|g.17488	0.809075	0.693631	-0.482294	0.574724	1.09143	-0.678162	-0.470498	1.10914	-0.647502	-0.0555937	-0.639528	-0.737159
Adur30603_comp0_c0_seq5|g.17493	-0.446011	0.247954	0.205087	0.188445	-0.333335	0.224935	1.131	-1.0688	-0.331855	0.644396	-0.0590858	0.358998
Adur30610_comp2_c0_seq3|g.17498	1.10447	-0.919144	-1.48054	1.14573	0.987639	-0.0967359	0.345048	-0.169016	-0.561266	0.559777	-0.422674	-0.610543
Adur30647_comp0_c0_seq1|g.17527	-0.286363	0.709182	0.384792	-0.707952	-0.744254	-0.633046	0.749516	0.120525	0.753216	0.20149	0.371745	-0.0310733
Adur30689_comp0_c0_seq1|g.17547	1.20082	-0.564162	-1.09152	1.25053	0.843786	-0.153329	0.37815	-0.0573402	-0.623918	0.680385	-0.618336	-1.06628
Adur30703_comp1_c0_seq1|g.17557	-1.27086	0.543921	-0.530558	-0.845061	-0.786287	0.0565386	0.737504	0.331969	0.3191	0.418756	1.01951	0.367421
Adur30835_comp0_c0_seq1|g.17646	0.474453	-0.541826	-0.692048	0.758111	0.645419	-0.381358	0.845863	-0.395652	-0.520593	1.07734	-0.583817	-0.588405
Adur30901_comp0_c0_seq2|g.17673	-0.932274	1.15471	0.524863	-1.50708	-0.840914	-0.672047	0.105514	0.892578	0.735522	-0.534104	0.500557	0.815426
Adur30956_comp0_c1_seq1|g.17689	-0.428054	0.855213	1.35468	-0.100468	-0.938262	-0.547289	0.217415	-0.547235	0.61599	-0.424457	0.0811286	0.259374
Adur30960_comp3_c0_seq2|g.17691	0.170154	-0.684997	-1.41759	0.78393	0.84364	0.1847	0.27707	-0.141478	-0.322736	0.791702	-0.642004	-0.228826
Adur31034_comp0_c0_seq7|g.47058	-0.419705	1.50665	0.596833	-0.439674	-0.322287	-0.273407	-0.537248	-0.122427	0.534686	-0.155392	0.0867388	-0.607522
Adur31037_comp0_c0_seq1|g.17737	1.02589	-0.48277	-1.29294	0.730467	0.777328	-0.315982	0.000920918	0.637746	-0.519047	0.659551	-0.1868	-0.932045
Adur31113_comp0_c0_seq1|g.47069	-0.725094	1.05932	1.27146	-0.665276	-1.10539	-0.59912	-0.0666455	-0.287059	0.732894	-0.135289	0.0999009	0.636472
Adur31113_comp1_c0_seq1|g.47071	-0.345194	1.10461	1.27921	-0.62253	-1.163	-0.595946	0.161825	0.0406946	0.581824	-0.478669	0.000381112	0.282475
Adur31115_comp0_c0_seq2|g.17768	0.955397	-0.794755	-0.630779	1.80057	0.693387	-0.376895	-0.190407	-0.441418	-0.534304	0.35889	-0.586232	-0.788138
Adur31200_comp0_c0_seq1|g.17817	-0.325307	0.270974	0.283554	0.0322037	-0.242628	-0.00708281	0.793668	-1.15826	-0.558188	0.299777	0.374121	-0.168366
Adur31220_comp0_c0_seq2|g.17835	0.883447	0.0183584	-0.985242	1.06239	0.874489	0.0459157	0.0698677	0.222679	-0.708701	0.321613	-0.97162	-0.969818
Adur31260_comp0_c0_seq1|g.17848	-1.02281	0.582983	0.262647	-1.07312	-0.279165	0.854644	0.51305	-0.513607	-0.14468	-0.306623	0.546261	0.55028
Adur31267_comp0_c0_seq2|g.17850	1.42606	-1.06604	-0.704143	0.892275	0.904367	0.0391567	0.15764	0.0285504	-0.783507	0.361773	-0.570285	-0.676708
Adur31324_comp0_c0_seq1|g.17856	0.620307	-0.760105	-0.798517	0.857028	0.575867	-0.361976	1.04366	-0.220826	-0.553041	0.967258	-0.499037	-0.67594
Adur31364_comp0_c0_seq1|g.17885	0.421404	-1.09962	-1.0551	1.0381	0.982909	-0.445406	0.0121601	0.697553	-0.84258	1.18991	-0.4562	-0.909563
Adur31368_comp1_c0_seq1|g.17888	-0.221724	0.822084	0.652298	-0.402938	-0.791025	-0.43352	0.0260269	-0.310097	0.557658	-0.171302	0.468448	-0.3504
Adur31392_comp0_c0_seq2|g.17894	-0.236611	0.724659	1.04932	-0.0793459	-0.924593	-0.453697	-0.273683	-0.229058	0.741327	-0.200154	0.074189	0.0944322
Adur31456_comp0_c0_seq1|g.17932	-0.603223	1.21422	0.818092	-1.03595	-0.911217	-0.271041	-0.0647129	0.700898	0.782791	-0.480085	0.277693	0.593116
Adur31458_comp0_c0_seq1|g.17934	0.63883	-0.718682	-0.759416	0.800661	0.587778	-0.456872	1.10038	-0.508601	-0.450825	1.09768	-0.510015	-0.701599
Adur31462_comp0_c0_seq1|g.17938	0.394218	1.15679	0.978423	-0.355274	-0.497246	-0.958111	0.560626	-0.159832	-0.0796717	0.0951712	-0.0943947	-0.194145
Adur31478_comp0_c0_seq1|g.17964	0.331617	-1.13379	-0.725813	1.38073	0.622621	-0.582991	0.149796	0.223154	-0.35459	0.859746	0.153873	-1.11962
Adur3151_comp0_c1_seq2|g.1980	1.20394	-0.696815	-1.59133	0.996569	0.883076	-0.116402	0.431898	0.259838	-0.545338	0.459641	-0.166926	-1.03977
Adur31520_comp0_c0_seq1|g.17999	0.926106	-0.248982	-0.826825	0.166472	1.24426	0.0259092	-0.671908	0.634533	-0.647794	-0.391962	-0.366885	-0.819882
Adur31562_comp0_c0_seq1|g.18043	0.0415833	0.709953	0.734713	0.108642	-0.752293	-1.29102	0.360142	-0.0798775	0.656533	0.422947	-0.0161215	0.0106733
Adur31565_comp1_c0_seq1|g.18046	-0.824136	1.21105	0.886031	-1.02788	-1.04663	-0.905988	0.593382	0.130324	0.694604	-0.241532	0.41664	0.332969
Adur31565_comp2_c0_seq1|g.47131	-0.661909	0.84707	0.922997	-0.889883	-0.983747	-0.710917	0.466966	0.31858	0.738559	-0.324307	0.490009	0.0573814
Adur31575_comp0_c0_seq33|g.18054	-0.13134	0.614353	0.453902	-0.568702	-0.563281	0.260709	-0.182753	0.101473	0.148133	-0.0278697	0.484707	-0.126432
Adur31579_comp1_c0_seq1|g.18063	-0.495837	1.11532	1.52969	-0.544745	-0.118324	0.675225	-0.577733	-1.20479	-0.0443814	-0.59114	0.313041	0.711124
Adur31583_comp0_c0_seq1|g.18066	1.14565	-0.675991	-0.606965	1.03252	0.92225	0.48374	0.00700314	-0.787884	-0.790883	0.200655	-0.827561	-0.642583
Adur31618_comp0_c0_seq1|g.18093	0.771741	-0.942629	-0.966914	1.13684	1.29997	0.4556	-0.235476	-0.670796	-0.931401	0.549217	-0.296187	-0.787173
Adur31661_comp0_c1_seq1|g.18122	-0.870121	1.2422	0.780647	-0.613079	-0.514972	-0.194233	-0.506402	-0.546275	0.369133	-0.717636	0.86297	1.02625
Adur31759_comp0_c0_seq1|g.18187	1.17878	-0.0193783	-0.743285	1.49253	1.2583	-0.0902136	-0.131912	-0.466787	-0.951677	0.519473	-0.86204	-1.20794
Adur31770_comp1_c0_seq4|g.18196	-0.371859	-0.16944	-0.292128	-0.234345	0.538242	1.46079	-0.41344	-1.37586	-0.331378	-0.422905	0.498455	0.471876
Adur31787_comp2_c0_seq1|g.18211	-1.04719	1.59646	-0.374374	-0.89941	-0.817455	-0.447647	0.0248954	0.538411	0.781489	0.0658825	0.0883537	1.01347
Adur31826_comp1_c0_seq1|g.18235	-0.56306	1.61326	0.704504	-0.618482	-0.44461	-0.415272	0.451244	-0.067766	-0.139128	-0.274928	0.188893	0.106944
Adur31869_comp0_c0_seq10|g.18267	-0.629564	0.913873	0.270536	-0.488063	-0.828651	-0.639639	0.784145	0.372506	0.337866	0.0589074	0.421519	-0.0481808
Adur31872_comp1_c0_seq2|g.18268	-0.630925	0.461632	0.146552	-0.404531	-0.259979	0.901263	0.128542	-1.00255	-0.395424	-0.394251	0.436495	1.03565
Adur31894_comp0_c0_seq9|g.18283	-1.2965	0.770135	0.360212	-1.23198	-0.946732	0.353264	0.803192	0.220601	0.562743	0.158012	0.222015	0.963084
Adur32023_comp0_c0_seq2|g.18355	0.268311	-0.979575	-1.7114	0.100474	0.686137	0.0400645	0.160704	1.02512	-0.423463	0.707606	-0.0301502	-0.0784874
Adur32033_comp0_c0_seq1|g.18365	0.488027	-0.834097	-0.852742	1.11661	0.929606	-0.108005	0.663613	-0.228576	-0.653841	1.12492	-0.539251	-1.1619
Adur3205_comp1_c0_seq2|g.2013	-0.329583	0.729574	-0.213168	-0.395078	-0.87201	0.392658	0.452874	-0.56964	-0.421537	-0.218833	0.281433	1.11144
Adur32050_comp0_c0_seq2|g.18372	0.980926	-0.562886	-1.19133	0.838561	1.00697	-0.564032	-0.0343611	0.821015	-0.824451	0.381414	-0.374086	-1.0908
Adur32086_comp0_c0_seq1|g.18402	-0.907795	0.736821	1.22906	-1.10989	-1.02429	-0.501033	0.134684	0.283175	0.701808	-0.145236	0.244496	0.859196
Adur32088_comp0_c0_seq3|g.18406	-0.437974	1.28343	0.836913	-0.50176	-1.00668	-0.664024	0.246793	0.775349	0.497487	-0.113028	0.216806	-0.349719
Adur32129_comp0_c0_seq1|g.18421	0.669711	-0.953935	-0.971573	0.876865	0.803343	-0.105812	0.757373	-0.278528	-0.693096	0.674062	-0.532087	-0.945828
Adur3213_comp0_c0_seq1|g.2017	-0.895055	0.632118	0.674116	-1.11271	-1.11843	-0.754889	0.421489	0.4161	0.547536	0.00250281	0.67301	0.262237
Adur32149_comp0_c0_seq2|g.18432	0.665877	1.63021	1.82235	0.182417	-0.410259	-0.138418	-0.487316	-0.959359	-0.55949	-0.129096	-0.195305	-0.659959
Adur32165_comp0_c0_seq2|g.18438	-0.0365053	1.45251	0.545687	-0.576693	-0.949806	0.284186	-0.261489	-0.300069	0.036533	-0.0269372	0.810126	0.558138
Adur32190_comp0_c0_seq1|g.18448	-0.83747	-0.375031	-0.593594	-1.08263	-1.05684	-0.772229	1.12528	1.01689	0.683187	0.8824	0.916368	0.878662
Adur32190_comp1_c0_seq1|g.18450	-0.888107	0.128397	-0.123496	-1.25258	-1.23508	-0.794222	0.892139	0.890378	0.675084	0.725165	0.845703	0.749415
Adur32234_comp0_c0_seq1|g.18490	0.357956	0.100263	-0.582244	0.00825133	0.865215	1.06455	-0.925765	-0.925765	-0.925765	-0.469577	0.369586	0.866016
Adur32247_comp1_c1_seq1|g.18497	-0.332246	1.29227	1.21977	-0.0309101	-0.0652216	0.621764	-0.2988	-0.986779	-0.522461	-0.480334	-0.0943822	-0.247333
Adur32273_comp0_c0_seq2|g.18523	0.264744	1.24497	1.06251	0.394207	-0.529066	-0.637035	0.0185726	-0.422386	0.105374	0.0982623	-0.0832636	-0.613825
Adur32283_comp0_c0_seq1|g.18550	-0.35588	1.02086	1.15077	-0.5978	-1.11884	-0.719179	0.158648	0.34755	0.56222	-0.0260744	0.224212	0.222716
Adur32294_comp0_c0_seq1|g.47215	0.693339	1.02025	0.20319	0.182652	-0.968995	-1.03081	-0.427483	0.0376578	0.748341	-0.124319	0.348712	-0.45961
Adur32298_comp0_c1_seq1|g.18563	1.34828	-0.857084	-1.03716	1.12199	0.959913	-0.268234	0.199511	0.0397415	-0.996617	0.62318	-0.211214	-1.04777
Adur32299_comp1_c0_seq9|g.18565	0.943454	-0.315208	-0.696685	0.787504	0.79605	-0.418754	-0.111871	0.710769	-0.174042	0.615453	-0.755438	-1.06942
Adur32323_comp2_c0_seq8|g.18582	-0.435078	1.57784	1.0755	-0.328898	-0.512673	-0.718005	0.777902	0.214718	0.121094	-0.130482	0.0298635	-0.397735
Adur32364_comp0_c0_seq1|g.18618	1.04381	-0.115954	-0.94274	1.16831	0.857085	-0.279885	0.212297	0.462941	-1.16645	0.325364	-0.725325	-0.893581
Adur32385_comp0_c0_seq1|g.18643	-0.381916	0.353087	-0.394333	0.245953	0.966318	1.29653	-0.47606	-1.40353	-0.958381	-0.40457	0.243997	1.02045
Adur32405_comp0_c0_seq1|g.18662	0.570269	0.225101	-0.891144	1.03837	-0.701312	0.260793	0.126228	-0.177474	-1.1073	0.236407	0.704233	0.729345
Adur32422_comp0_c0_seq2|g.18670	0.886357	-0.782369	-0.705071	0.969234	1.26439	-0.0385923	-0.36233	-0.23288	-0.744746	0.297291	-0.460308	-0.837264
Adur32468_comp0_c0_seq1|g.18709	-0.857745	-1.27187	-1.22598	-0.604294	-0.648111	-1.02931	1.15157	1.12314	0.935812	1.17731	0.818055	0.687524
Adur32534_comp1_c0_seq7|g.18753	0.475885	1.59932	1.47682	0.7335	-0.041341	0.178567	-0.711274	-0.718604	-0.52701	-0.5348	-0.420296	-0.653726
Adur32537_comp0_c0_seq2|g.18754	0.33244	-1.17876	-1.01538	0.47807	0.108255	-1.01086	1.07418	0.260227	-0.501761	1.44599	-0.0427068	-0.511353
Adur32546_comp0_c0_seq1|g.18765	-1.24919	0.695537	0.692124	-1.08351	-0.751006	0.495558	-0.483634	-0.439509	0.700632	-0.481816	0.348475	1.88156
Adur32557_comp0_c0_seq1|g.18775	0.823209	-0.26751	-0.773954	0.972793	0.676957	-0.392841	-0.561581	0.00777097	-0.407803	0.17433	-0.672088	-0.681495
Adur32612_comp0_c0_seq2|g.18819	1.17839	-0.423964	-0.980322	1.04273	0.922886	-0.0327431	0.455427	-0.312348	-0.718303	0.372809	-0.784354	-0.770908
Adur32614_comp17_c0_seq2|g.18825	0.953799	-0.250833	-0.970395	1.09079	0.842826	-0.0779266	0.201978	0.716108	-0.877499	0.415671	-0.521906	-0.990531
Adur32733_comp1_c0_seq1|g.18896	-0.125513	1.10776	-0.425706	0.751786	-0.111401	-0.810362	-0.360742	-1.2961	0.319394	0.54828	-0.212752	0.574874
Adur32767_comp0_c0_seq1|g.18906	1.03757	-0.840333	-1.08603	0.87385	1.24416	-0.427062	0.122686	0.666922	-0.632907	0.258801	-0.583429	-0.96589
Adur32810_comp0_c0_seq1|g.18946	-0.639839	1.1145	1.04888	-1.30731	-0.78723	-0.755535	0.0650985	0.48857	0.745013	-0.489809	0.185453	0.715027
Adur32810_comp1_c0_seq1|g.18947	-0.603553	1.2161	1.11499	-1.24494	-0.705433	-0.646315	-0.00119397	0.440421	0.639187	-0.522985	0.215637	0.661178
Adur32853_comp0_c0_seq3|g.18975	-0.0937801	0.547325	1.27193	0.15258	-0.00638994	1.64587	-0.794934	-1.27484	-0.474906	-0.635789	-0.222169	-0.76151
Adur32861_comp0_c0_seq5|g.18980	0.520123	-0.378524	-1.11416	1.27574	1.07202	0.0782545	-0.196697	-0.0970177	-0.694758	0.656755	-0.831047	-0.602386
Adur33009_comp1_c0_seq1|g.47300	-0.155741	0.592733	0.67557	0.260282	-0.0868325	0.97605	-0.112127	-1.16977	-0.598203	-0.710272	0.406614	0.21644
Adur33059_comp0_c0_seq1|g.19100	-0.492202	0.694192	0.602588	-0.78282	0.168426	1.15379	-0.707398	-0.819967	-0.669566	-0.727127	0.511602	1.14516
Adur33070_comp0_c0_seq2|g.19109	1.00012	-0.750477	-0.750477	0.69483	1.37906	-0.136302	-0.0873644	-0.213309	-0.750477	0.182839	-0.690491	-0.750477
Adur33175_comp3_c0_seq2|g.19159	1.07288	-0.555262	-0.957079	0.549247	0.553021	-0.138995	-0.10143	-0.337681	-0.626764	0.69151	-0.732505	-0.808642
Adur33222_comp0_c0_seq1|g.19191	1.15442	-0.782949	-1.53948	1.28422	0.507298	-0.899392	0.547902	0.11642	-0.070991	0.898084	-0.373383	-0.946163
Adur3325_comp0_c0_seq1|g.2101	0.976877	-0.5097	-0.633078	1.19695	0.657149	-0.59365	0.202863	0.354253	-1.01727	0.392694	-0.819205	-0.955636
Adur33258_comp0_c0_seq2|g.19217	0.128866	1.70042	0.913808	0.114129	-0.705409	-0.10114	-0.365655	-0.45456	-0.312767	-0.477355	-0.0727657	0.771423
Adur33289_comp0_c0_seq1|g.19242	0.643291	-0.424454	-0.537364	1.2077	0.600668	-0.284124	0.296813	0.0900257	-0.796709	0.659208	-0.900815	-0.635639
Adur33294_comp0_c0_seq1|g.19245	-0.0202495	-0.922245	-0.802403	-0.131647	0.24145	-0.237169	0.583059	-0.00499733	-0.133682	0.450722	-0.079559	0.0417731
Adur33305_comp0_c0_seq1|g.19248	-0.990128	0.704589	1.10726	-0.773674	0.109297	1.32041	-0.94903	-0.707103	-0.0285473	-0.741198	0.26451	1.07603
Adur33331_comp2_c0_seq1|g.19269	1.07695	0.259347	-1.01915	1.33602	0.850127	-0.431194	0.291107	0.139354	-0.386585	0.648984	-1.06862	-1.20589
Adur33331_comp4_c0_seq4|g.19272	1.15031	-0.179722	-0.90099	1.28884	0.957583	-0.915336	0.40118	0.271524	-0.344612	0.590815	-0.757082	-1.28708
Adur33351_comp0_c0_seq3|g.19287	-0.0961249	-1.02916	-0.83	-0.0111716	0.532689	0.993402	0.0875715	-0.0830725	0.352519	0.176731	0.174332	-0.24296
Adur33354_comp0_c0_seq1|g.19292	0.987827	-0.366322	-1.02073	0.601862	1.05591	-0.0851924	0.0513289	0.426372	-0.757282	0.3369	-0.690131	-1.06788
Adur33396_comp1_c0_seq1|g.19327	-0.53844	1.61403	0.565206	-0.211071	-0.973583	-0.283872	0.432603	0.20756	0.167252	-0.243046	-0.016506	0.00922393
Adur33411_comp2_c0_seq2|g.19341	-0.350091	1.33977	0.663198	-0.0596749	-0.284173	-0.196193	-0.33604	-0.89462	0.338452	0.250504	-0.484252	0.663714
Adur33459_comp2_c0_seq2|g.19383	1.29592	-0.38866	-1.02241	1.67909	0.811063	-0.295422	0.377352	-0.324213	-0.855563	0.375397	-0.67514	-0.878638
Adur33463_comp0_c0_seq2|g.19386	-0.828896	1.14276	0.136222	-1.00064	-1.21382	-0.289893	0.628584	0.817069	0.825611	-0.229341	0.328085	0.410139
Adur33473_comp2_c0_seq5|g.19395	-0.175218	1.05389	-0.299048	-0.674594	-1.08072	-0.535228	0.74049	0.934177	0.429548	0.225146	0.398167	-0.377662
Adur33521_comp0_c0_seq1|g.19441	0.0172319	1.16989	0.48463	0.272579	-0.748505	-1.0636	0.144044	-0.110991	0.966426	-0.103769	0.00374329	-0.119783
Adur33530_comp1_c0_seq3|g.47332	0.943051	-0.321091	-1.12628	0.168039	1.17242	-0.216562	0.83479	0.438741	-0.95857	0.524226	-0.553739	-0.560639
Adur33550_comp0_c0_seq1|g.19464	0.704351	-0.740284	-0.986272	0.77927	0.762034	-0.270549	0.199109	0.945776	-0.37039	0.377269	-0.170907	-0.896913
Adur33584_comp0_c0_seq1|g.19486	1.58889	-0.909117	-0.909117	1.46213	0.856278	-0.33625	0.367451	-0.661495	-0.772793	0.392509	-0.606594	-0.781508
Adur33585_comp0_c0_seq1|g.19488	1.29883	-0.61118	-0.697928	1.40348	1.03724	-0.188656	0.17245	-0.555988	-0.819883	0.408714	-0.935923	-0.945826
Adur33598_comp2_c0_seq2|g.19507	1.06507	-0.700441	-0.358784	1.3896	0.774758	-0.0132624	-0.0256714	0.0105014	-0.779001	0.549515	-0.719815	-1.13891
Adur33619_comp1_c0_seq1|g.19531	0.423937	-0.621585	-1.22429	-0.182889	0.271071	-1.01408	0.605127	1.69541	0.729601	0.445638	-0.361161	-0.485121
Adur33698_comp0_c0_seq1|g.19596	-0.723522	1.07381	0.84801	-0.945937	-0.99501	-0.129932	-0.0999426	-0.128014	0.458503	-0.505925	0.512064	0.751388
Adur33755_comp0_c0_seq2|g.19646	0.690195	-0.605813	-0.653526	0.471788	1.23096	0.0043534	0.866329	-0.774096	-0.908379	0.534271	-0.775231	-0.845108
Adur33897_comp0_c0_seq3|g.19730	0.010186	0.026488	0.924977	0.16917	-0.297265	0.263256	0.0683367	-1.15233	-0.502052	0.127417	0.473735	-0.407007
Adur33917_comp1_c0_seq2|g.19732	-0.489238	0.873678	-0.0662941	-0.137043	-0.0201674	0.365588	-0.526723	-1.14807	-0.200921	-0.00504179	0.593428	0.676234
Adur33924_comp1_c0_seq1|g.19739	-0.406265	1.5335	1.22972	-0.616248	-0.738801	-0.60488	-0.0174715	0.667475	0.258565	-0.780849	-0.120911	0.237632
Adur33952_comp0_c0_seq2|g.19747	-0.544017	0.0353381	-0.339232	-0.484402	-0.178023	1.29657	-0.10638	-0.561344	-0.563597	-0.475005	0.786035	1.07283
Adur34036_comp0_c0_seq2|g.19792	-0.601724	1.41204	1.40417	-0.635618	-0.867284	0.0593068	-0.0791464	-0.574418	0.364454	-0.404835	0.463936	0.575081
Adur34037_comp0_c0_seq1|g.19794	-0.905142	0.814061	0.0246437	-0.440898	-0.74262	-1.1563	0.888205	0.214259	0.73379	0.439476	0.267404	0.000425327
Adur34055_comp0_c0_seq1|g.19811	-0.923222	0.352957	1.03375	-0.967697	-1.02279	-0.277203	-0.0125892	0.578678	0.565602	-0.108941	0.650464	-0.145918
Adur34072_comp0_c0_seq3|g.19820	-0.82758	0.40859	0.737182	-0.590272	-0.520899	0.696619	-0.637067	-0.433933	-0.236262	-0.74759	0.634753	1.1087
Adur34085_comp2_c0_seq1|g.19827	-0.231724	-0.700716	-0.252094	-0.13119	0.0628211	1.1893	0.10507	-1.19346	-0.564852	-0.104504	0.890177	0.518653
Adur34121_comp0_c0_seq1|g.19841	0.280442	-0.415826	-1.04804	0.830502	0.856024	-0.163369	0.884339	-0.128961	-0.490962	0.880172	-0.725546	-0.747242
Adur34128_comp0_c0_seq1|g.19845	0.723231	-0.306415	-1.25617	0.537048	0.980903	-0.072654	0.377994	0.69783	-0.638294	0.740976	-0.239138	-1.64977
Adur34148_comp0_c0_seq1|g.19863	1.38877	-0.854217	-0.996625	1.2672	0.491553	-0.33829	-0.130199	-0.10301	-0.732002	0.894289	-0.376273	-0.898156
Adur3417_comp0_c0_seq2|g.2147	0.362078	1.54098	0.93849	0.288379	-1.11738	-0.368173	-0.100564	-0.0202461	0.0382191	-0.420767	-0.0922854	0.435313
Adur34170_comp0_c0_seq2|g.19891	-0.79091	0.376772	0.812031	-0.582327	-0.0683522	1.13114	-0.227692	-1.21082	-0.28749	-0.558571	0.477099	0.705811
Adur34176_comp0_c0_seq1|g.19904	0.421629	-0.860611	-0.954094	0.860654	0.682559	0.0775243	1.07743	-0.598039	-0.763142	0.949651	-0.510416	-0.633898
Adur34217_comp0_c0_seq2|g.19936	0.673223	-0.848318	-0.4526	1.64004	0.841556	-0.256305	0.203497	-0.324677	-0.68346	0.589626	-0.54395	-0.713803
Adur34225_comp0_c0_seq2|g.19943	-0.269084	0.626623	0.91236	0.0700158	-1.10404	-0.307642	0.279917	-0.446887	0.522355	-0.327395	0.273604	0.473344
Adur34239_comp1_c0_seq1|g.19951	1.27205	-0.554457	-1.00783	1.16958	0.825976	-0.390002	0.489717	0.335759	-0.9829	0.426206	-0.575115	-0.998112
Adur34242_comp1_c0_seq3|g.19955	1.29469	-0.224233	-0.618827	1.18026	1.22505	-0.3045	-0.459846	-0.0618148	-0.776697	-0.415657	-0.632007	-0.367336
Adur34281_comp2_c0_seq5|g.19992	1.22424	-0.509966	-1.25976	0.540191	1.23491	-0.114093	-0.0985849	0.145882	-0.872341	0.203997	-0.509208	-0.883325
Adur34282_comp3_c1_seq3|g.19995	0.113451	0.553906	0.148893	-0.153403	0.500219	0.966159	-0.892058	-1.6782	-0.77482	-0.453921	0.133424	0.594848
Adur343_comp0_c0_seq1|g.242	-0.613072	1.46348	1.24244	-0.617889	-0.768785	-0.177565	-0.502553	0.140748	0.232775	-0.864519	0.129812	0.655473
Adur34341_comp0_c0_seq1|g.20042	0.987211	-0.747484	-1.24396	1.20839	1.1374	-0.21219	0.270901	-0.185024	-0.930659	0.295912	-0.473201	-0.413663
Adur3441_comp0_c0_seq1|g.2155	-0.0488485	1.315	0.998189	-0.0403918	-1.0107	-0.49443	0.296866	-0.407565	0.421079	-0.163923	-0.0850862	0.233331
Adur34433_comp1_c0_seq3|g.20075	-0.86594	0.953799	1.08242	-0.954434	-0.972781	-0.36394	0.0985855	0.16154	0.508035	-0.0849324	0.363405	0.816117
Adur34438_comp0_c0_seq1|g.20080	-0.67325	0.0186058	-0.0450377	-0.676255	0.135035	1.18696	-0.367637	-1.05055	-0.147619	-0.386801	0.698926	1.34813
Adur34572_comp1_c0_seq1|g.20152	0.889965	-1.18633	-1.25291	0.668808	0.864682	0.0986549	0.436993	0.116967	-0.750443	0.648215	-0.38358	-0.640496
Adur34582_comp1_c1_seq2|g.20160	-1.21938	-0.418633	-0.143039	-1.29943	-0.83202	-0.478363	1.03768	0.171137	0.359951	0.826373	1.15061	1.09005
Adur34598_comp2_c0_seq4|g.20168	-0.479062	1.02292	0.649633	-0.155313	-0.41369	0.215185	0.00732692	-0.890444	-0.307834	-0.602022	0.357923	0.11017
Adur34687_comp0_c0_seq1|g.20225	0.697374	-1.03998	-0.871239	1.19898	0.947156	-0.343689	0.135039	-0.0914434	-0.791516	0.843504	-0.0598178	-1.02026
Adur34712_comp0_c0_seq3|g.20235	0.658897	0.600411	0.270966	1.05911	-0.532564	-0.52384	0.273594	-1.21419	-0.244666	0.139182	0.128404	-0.665173
Adur34718_comp0_c0_seq1|g.20243	1.06723	-0.465041	-1.71562	0.903691	0.767689	-0.473051	0.71229	0.499897	-0.445321	0.73927	-0.22703	-1.37122
Adur34740_comp1_c0_seq1|g.20250	-0.973028	1.22343	0.747288	-0.702199	-0.504238	-0.523353	0.10324	-0.430545	0.674944	-0.0136008	0.451116	0.5021
Adur34787_comp0_c0_seq4|g.20281	-0.27568	0.771821	1.70545	-0.154761	-0.634324	0.25666	0.459456	-0.750473	0.0476683	-0.186142	0.100914	-0.27498
Adur34804_comp0_c0_seq2|g.20291	-0.771072	1.49124	0.578926	-0.849074	-0.934396	-0.495239	-0.149326	0.610368	0.621607	-0.14798	0.233374	0.208102
Adur3483_comp0_c0_seq1|g.2178	1.20254	-0.850652	-0.958434	0.417267	1.00165	0.153669	-0.194799	0.185307	-0.914595	0.641506	-0.280897	-1.21828
Adur34841_comp0_c0_seq1|g.20310	-0.748856	0.0343188	0.884663	-0.565133	-0.146577	0.705497	0.150698	-1.29037	-0.298969	-0.329349	0.526675	0.941512
Adur34859_comp0_c0_seq1|g.20334	-1.38666	0.694951	0.527248	-1.31644	-0.549241	0.65296	-0.53758	-0.4955	0.450309	-0.34909	0.664012	1.01256
Adur34865_comp1_c0_seq1|g.20339	-0.690208	-0.227283	0.350534	-0.754305	-0.731986	0.634361	0.175162	-0.908087	0.213807	-0.423523	0.761603	1.49758
Adur34865_comp1_c1_seq4|g.20340	-0.944055	-0.107801	0.351376	-0.757681	-0.443673	0.658674	-0.0222123	-1.12422	0.174097	-0.351802	0.882667	1.43698
Adur34945_comp0_c0_seq1|g.20376	-0.838996	0.250814	-0.823887	-0.644717	0.228038	0.707931	0.0718676	-0.537843	-0.34418	-0.0680007	0.793919	1.48035
Adur35097_comp0_c0_seq3|g.20474	-0.870563	-0.0605897	0.297	-0.712845	-0.434581	-0.471799	0.612665	-0.645317	0.00346737	0.190727	0.622336	0.213611
Adur3510_comp0_c0_seq2|g.2192	1.13474	-0.971989	-1.33739	1.00227	0.883961	0.310263	0.353778	-0.0907399	-0.997112	0.459006	-0.222018	-0.905248
Adur3516_comp3_c0_seq1|g.2196	0.796482	-1.11543	-1.19038	1.03507	0.774387	-0.35149	0.597066	0.711826	-0.410326	0.471266	-0.929758	-0.618561
Adur35168_comp1_c0_seq1|g.20522	-0.715475	1.59416	1.39673	-0.396588	-0.506873	0.21132	-0.300213	-0.70724	0.0607027	-0.628457	0.043998	0.355528
Adur3517_comp1_c0_seq1|g.2197	-0.927035	1.031	1.21913	-0.692004	-1.07015	-0.641222	0.45213	-0.0881644	0.719624	0.0149864	0.225489	0.50463
Adur35199_comp4_c0_seq1|g.20544	-0.292816	1.07613	0.23092	0.581119	-0.483229	0.0489968	-0.394194	-0.872013	-0.252777	-0.269272	-0.0438101	0.130856
Adur35220_comp0_c0_seq1|g.20564	0.553465	-0.148915	0.0193913	0.512596	-0.55343	-0.0545294	0.712	-1.10987	-0.279964	0.0965367	0.177189	0.303781
Adur35307_comp0_c0_seq3|g.20592	-0.145252	1.4269	1.49803	-0.479733	-0.826084	-0.0745638	-0.173008	-0.262967	0.171265	-0.552755	0.0540912	-0.498153
Adur35307_comp1_c0_seq1|g.20593	-0.222145	0.989213	1.19979	-0.543325	-0.905892	-0.67834	0.0732686	0.369521	0.060051	-0.394649	0.299921	-0.0691341
Adur35351_comp0_c0_seq1|g.20630	-0.214023	1.00855	1.40006	-0.209874	-0.404399	0.989972	-0.585073	-0.974593	-0.15942	-0.754986	0.531761	0.0793475
Adur35359_comp0_c0_seq1|g.20635	1.2335	-0.727468	-0.934734	1.63241	0.684795	-0.399723	0.601845	-0.482095	-0.59545	0.699338	-0.776631	-0.902809
Adur35384_comp0_c0_seq2|g.20654	-0.15256	1.22976	0.398432	-0.32407	-0.413616	-0.0191842	-0.434163	0.304966	-0.312761	0.151432	0.800017	-0.00639844
Adur35412_comp0_c0_seq3|g.20696	0.576806	-0.922296	-0.765418	1.36674	0.548867	-0.282292	0.937326	-0.386034	-0.411053	0.476583	-0.527273	-1.05366
Adur35421_comp0_c0_seq2|g.20700	0.638989	-0.68924	-0.631665	1.1267	1.47015	-0.13397	-0.515305	-0.24369	-0.051684	-0.57814	-0.420921	-0.893349
Adur3549_comp2_c1_seq3|g.2224	0.335939	-1.08753	-1.73377	0.427931	0.636457	-0.289288	0.579357	0.544918	-0.157363	0.725021	0.0776784	-0.47935
Adur35546_comp0_c0_seq3|g.20763	1.2925	-0.88552	-0.925556	1.25115	1.08694	0.546859	0.048463	-0.301135	-1.07288	0.271168	-0.496057	-1.07901
Adur35577_comp0_c0_seq1|g.20785	0.985128	-0.00645692	-0.872546	0.737697	0.887156	-0.734137	0.489151	0.886148	-0.453856	0.48317	-0.949886	-0.989315
Adur35603_comp2_c0_seq1|g.20809	0.780686	-0.46455	-1.59434	0.387256	0.871584	-0.178729	0.188662	0.645123	-0.64718	0.3918	-0.439637	-0.226168
Adur35659_comp1_c0_seq1|g.20859	-0.415967	-0.324059	-0.120016	-0.221746	0.247301	1.26952	-0.271232	-1.33426	-0.306073	-0.163601	0.789863	0.918833
Adur3566_comp1_c0_seq1|g.2229	0.771635	0.0488396	-0.851285	0.446049	0.935911	-0.198488	0.206616	0.752333	-0.381569	0.649889	-0.821384	-1.10922
Adur35661_comp1_c0_seq3|g.20861	-0.55047	1.10459	0.216064	-1.18132	-0.480073	0.208483	-0.418872	0.110321	0.661454	-0.30329	0.766278	0.623919
Adur35672_comp0_c0_seq1|g.20869	1.21587	-0.677057	-1.3817	1.26646	0.827677	-0.113458	0.517926	-0.152153	-0.976231	0.729667	-0.406643	-0.875671
Adur35673_comp0_c0_seq1|g.20871	1.56124	-0.680281	-0.434009	1.25325	1.1815	0.1048	-0.368016	-0.595701	-0.858114	0.281279	-0.605064	-0.760196
Adur35683_comp0_c0_seq1|g.20875	-1.05088	0.682655	0.681338	-0.707155	-0.621898	0.577051	0.140484	-0.444204	0.152215	-0.410417	0.606748	0.766968
Adur35687_comp0_c0_seq2|g.20881	-0.733357	0.905764	1.13379	-0.905515	-0.9838	-0.747887	0.105756	0.0676465	0.845873	-0.252747	0.320438	0.656542
Adur3574_comp0_c0_seq3|g.2243	0.983859	-0.538174	-1.18425	0.934978	0.670809	-0.151127	0.0294185	0.0736354	-0.853402	0.875645	-0.678982	-1.06169
Adur35822_comp3_c0_seq1|g.20986	-0.63151	1.19346	0.261851	-0.845962	-0.792944	-0.454168	0.270288	0.180595	0.771706	-0.422301	0.565795	0.524644
Adur35827_comp1_c1_seq2|g.20993	0.657606	-0.575418	-1.18055	0.695564	0.85431	-1.31263	0.608745	0.874068	-0.234289	0.870279	-0.291736	-1.4954
Adur35864_comp0_c0_seq1|g.21030	0.678803	-0.890579	-0.87779	0.640675	0.556771	-0.51514	1.1858	0.0699742	-0.759801	0.630074	-0.395171	-0.83828
Adur35933_comp1_c0_seq1|g.21076	0.632223	-0.718843	-1.4133	0.349748	0.515668	-1.14533	0.18546	1.22687	0.113168	0.988336	0.496293	-0.72232
Adur35972_comp1_c0_seq2|g.21107	-0.542524	0.706145	0.282822	-0.423368	-0.84378	-1.03974	0.851807	0.243847	0.79153	0.327359	0.548972	0.484053
Adur36037_comp1_c0_seq1|g.21170	-0.977807	1.22577	1.34498	-0.571735	-1.10912	-0.227349	0.0578979	-0.396973	0.777119	-0.166469	0.174869	0.970167
Adur3607_comp1_c0_seq3|g.2252	1.2666	-0.0947851	-0.795218	1.28402	1.0961	-0.566316	-0.288492	-0.36259	-0.639364	0.642131	-0.854009	-0.939889
Adur36090_comp0_c0_seq2|g.21203	0.988437	-0.558756	-0.85288	1.12792	0.842693	-0.42271	0.663939	0.220778	-0.666202	0.864821	-0.747587	-1.22743
Adur36104_comp1_c0_seq1|g.21210	0.296371	-0.109552	-0.664895	0.756277	0.789971	0.601329	-0.103286	-1.47469	-0.686834	-0.107097	0.337113	0.0870839
Adur36144_comp3_c0_seq2|g.47607	-0.445817	0.685306	0.351155	0.112571	-0.977728	-0.533652	0.593039	-0.228798	0.49125	-0.0526767	0.40875	-0.175446
Adur36163_comp1_c1_seq4|g.21245	-0.438594	1.37143	1.4754	-0.755117	-0.623021	-0.587008	-0.0607425	-0.015399	0.43738	-0.0379072	0.00987684	-0.357935
Adur36188_comp1_c0_seq1|g.21258	-0.626004	1.18301	0.934715	-1.11619	-0.817066	-0.780595	0.0603797	0.4874	0.638239	-0.174145	0.31324	0.00211986
Adur3628_comp1_c0_seq1|g.2268	1.19476	-0.295202	-0.653602	1.61979	0.677846	-0.699039	0.167436	0.0390008	-0.324311	0.694089	-0.688038	-1.3308
Adur36321_comp0_c0_seq1|g.21323	-1.3688	0.749979	0.248545	-1.03865	-0.957298	-1.23404	0.974608	0.710263	0.97053	0.261269	0.37516	0.94229
Adur36338_comp0_c0_seq1|g.21336	-0.897698	0.211717	0.791714	-0.877183	-1.02598	-0.235082	0.593984	0.112959	0.188626	0.0604723	0.581824	0.591749
Adur36385_comp1_c0_seq3|g.21356	-0.850474	0.858324	0.808082	-0.689155	-1.09458	-0.614457	0.392716	0.342073	0.958839	0.15042	0.241929	0.49368
Adur36403_comp0_c0_seq1|g.21359	-0.697651	0.912248	1.26564	-0.497689	-1.07185	-0.721097	0.589821	-0.345607	0.530942	0.00470154	0.300456	0.10024
Adur36420_comp0_c0_seq2|g.47636	-0.907029	0.93202	0.835054	-0.48295	-0.894981	-0.450178	0.659908	-0.157449	0.351581	0.345599	0.128678	-0.0151133
Adur36438_comp0_c0_seq2|g.21373	-0.284127	1.77962	0.195165	-0.16112	-0.83014	-1.16043	0.210833	-0.0839205	0.598429	-0.0588458	0.274853	0.261003
Adur36550_comp0_c1_seq1|g.21425	0.797446	-0.416482	-0.531157	0.729411	0.828318	-0.29991	-0.309676	0.569813	-0.461772	0.664346	-0.82452	-1.36149
Adur36559_comp0_c0_seq4|g.47654	-0.497586	0.710411	-0.437022	-0.109059	-1.07219	-0.387414	0.0613437	-0.0253781	0.714388	-0.491197	0.517061	0.802321
Adur36597_comp0_c0_seq3|g.21439	-0.640753	0.926988	1.05466	-0.900023	-0.809293	-0.917269	0.163533	0.321765	0.735506	-0.256113	0.378312	0.479529
Adur36669_comp0_c0_seq3|g.21460	1.12291	-0.866354	-1.17666	0.857839	0.935538	0.147122	0.319173	-0.25537	-0.558113	0.843192	-0.386785	-1.32698
Adur36681_comp1_c0_seq1|g.21469	-0.878127	0.0562596	0.469907	-0.716939	-0.42183	1.15969	-0.30574	-0.572926	-0.267495	-0.782418	0.611295	1.47622
Adur36696_comp0_c0_seq1|g.21478	-0.343231	-0.0438247	0.122854	-0.613801	0.591422	1.04521	-0.381043	-0.99296	-0.88107	-0.438003	0.472277	1.61478
Adur36727_comp0_c0_seq1|g.21495	-0.99121	0.980761	1.16038	-0.893042	-1.13807	0.102148	-0.0443004	-0.216449	0.990101	-0.131854	0.337953	0.805358
Adur36746_comp0_c0_seq1|g.21505	0.6073	0.606084	-0.8278	0.830327	0.0936316	0.150238	-0.0530914	-1.18342	-0.360736	-0.111396	0.19184	0.145854
Adur36876_comp0_c1_seq1|g.21574	-0.741302	1.15002	1.0854	-0.432945	-1.05068	-0.65061	0.158118	0.0930972	0.742793	-0.16061	-0.0601847	0.627012
Adur369_comp1_c0_seq1|g.261	-0.776549	1.12095	0.532981	-0.280671	-0.877358	0.310074	0.545689	-0.665112	0.487574	0.181771	0.394704	0.841205
Adur36910_comp0_c0_seq4|g.21599	0.829329	-0.601675	-0.662251	0.83644	1.77866	-0.355703	-0.0327968	-0.509964	-0.894476	0.587229	-0.553296	-0.705942
Adur36955_comp2_c0_seq2|g.21629	-0.429027	1.07159	0.762289	-0.121433	-0.730419	-1.07923	0.75212	-0.0372413	0.435656	0.199091	0.27918	-0.495184
Adur36957_comp2_c2_seq1|g.21633	1.45901	-1.20393	-0.933786	1.24751	0.69175	0.137681	0.258443	-0.206669	-0.600005	0.403176	-0.288883	-1.11759
Adur37009_comp0_c0_seq1|g.21668	0.579729	-0.643084	-0.915061	1.34174	0.57341	-0.11674	0.388576	-0.226654	-0.330677	0.38152	-0.745374	-0.90016
Adur37043_comp0_c0_seq1|g.21688	-0.145665	1.34566	0.343657	0.155851	-0.119321	0.683502	-0.420736	-0.539657	-0.584228	-0.356791	0.497306	0.538023
Adur37066_comp1_c0_seq2|g.21699	-0.30727	1.21905	0.578476	-0.412474	-0.543415	0.276054	-0.517147	-0.208717	0.162332	-0.594202	0.543271	0.206121
Adur3724_comp1_c0_seq2|g.2331	1.03907	-0.400498	-1.5255	0.791901	0.803301	-0.377252	0.172659	0.928389	-0.455289	0.430956	-0.245331	-0.951617
Adur37303_comp0_c1_seq1|g.21798	1.67913	-0.0317163	-0.500275	1.36132	1.07431	0.0136961	0.147492	-0.295265	-1.06788	-0.0148583	-1.01958	-0.924931
Adur37304_comp2_c0_seq1|g.21799	1.24304	-0.401203	-0.817512	1.3786	0.999411	-0.150214	0.443287	-0.454252	-0.981621	0.65246	-0.684759	-1.11019
Adur37386_comp12_c0_seq3|g.21823	-0.246236	1.20841	0.630459	-0.718482	-0.413646	-0.289335	0.470298	-0.412318	0.355267	-0.508347	0.50151	-0.490505
Adur37388_comp0_c0_seq1|g.21828	-0.14515	-0.732063	-0.642715	0.334766	0.599789	-0.291656	1.58378	-0.0462147	-0.544059	0.934774	-0.349755	-0.539591
Adur37416_comp1_c0_seq2|g.21849	-0.92923	1.3031	0.699993	-0.479376	-1.28071	-0.466898	0.0751124	0.50246	0.602721	-0.22939	0.453826	0.61083
Adur3747_comp2_c0_seq6|g.2343	1.00436	-0.443178	-0.944722	1.33944	1.14758	-0.217955	0.487894	-0.0771919	-0.95903	0.262784	-0.623284	-1.04716
Adur37472_comp0_c0_seq1|g.21892	-0.739098	1.46963	-0.0913522	-0.997934	-0.711391	-0.550304	0.106855	0.652341	-0.0401514	-0.0138738	0.310137	0.845227
Adur37502_comp1_c0_seq1|g.21907	0.667816	-0.34873	-1.1618	0.837486	0.843709	-0.512989	-0.222051	0.700904	-0.19221	0.374571	-0.711564	-0.568134
Adur37512_comp0_c1_seq1|g.21920	0.298537	-0.0385456	-0.594652	-0.286116	0.654986	1.10716	-1.00493	-1.00523	-0.546607	-0.395635	0.486011	0.923941
Adur37514_comp0_c0_seq2|g.21921	0.824529	-0.470003	-1.45557	0.891838	0.674044	-0.595125	0.642462	0.79888	-0.511459	0.64325	-0.298274	-0.938038
Adur37535_comp1_c0_seq1|g.21932	1.10522	-0.549902	-0.789854	0.119169	0.744598	0.0520521	-0.501957	0.780949	-0.560329	-0.0088338	0.101917	-0.848818
Adur37700_comp0_c0_seq4|g.22004	-0.669929	0.5582	0.742533	-1.17566	-0.962976	0.680236	-0.469683	-0.429686	1.357	-0.359045	0.570594	-0.0279773
Adur37779_comp0_c0_seq10|g.22042	-0.238414	1.19337	1.31312	-0.636642	0.0682844	-0.178177	-0.0947639	-0.918688	0.0603301	-0.622632	0.206351	-0.596852
Adur37780_comp0_c0_seq1|g.22043	-0.820019	1.10304	1.181	-0.520987	-1.18121	-0.351604	0.273021	-0.357328	0.633999	-0.0814163	0.382127	0.56797
Adur37809_comp0_c0_seq1|g.22061	-0.987308	0.798795	0.147566	-0.884804	-0.804574	-0.699331	0.403159	0.148649	1.25717	0.242348	0.570331	0.30056
Adur37892_comp0_c0_seq1|g.22085	0.660358	-0.845235	-0.956879	0.61099	0.930446	0.420216	0.187487	0.594413	-0.883551	0.521173	-0.0995794	-1.51427
Adur3791_comp1_c0_seq7|g.2353	-0.340526	1.71886	1.34361	0.199986	0.14831	0.410161	-0.865901	-0.750415	-0.0278092	-1.10442	-0.393179	-0.14519
Adur37917_comp1_c0_seq3|g.22092	0.553382	-1.15531	-1.76385	0.816578	0.106062	-0.649262	0.58937	0.576067	0.329037	0.990521	-0.241149	-0.668085
Adur37974_comp0_c0_seq2|g.22113	1.05818	0.0294859	-0.432849	0.556265	1.074	-0.804099	-1.06964	0.988747	-0.66057	0.212686	-0.501078	-0.686413
Adur38032_comp1_c0_seq1|g.47787	-0.866183	1.20738	0.956804	-0.920691	-0.797163	-0.502206	0.184159	0.342622	0.610485	-0.634892	0.374075	0.158961
Adur38055_comp0_c0_seq1|g.22142	1.24859	-0.211928	-1.17278	1.03789	0.874666	-0.228238	-0.330674	0.532563	-0.851626	0.371734	-0.653905	-0.829391
Adur3806_comp2_c0_seq1|g.2373	0.604977	-0.64165	-0.626327	0.673112	0.739767	-0.361366	0.884011	-0.603469	-0.47404	0.901546	-0.561731	-0.55359
Adur38060_comp0_c0_seq2|g.22147	-0.335284	0.801258	0.446473	-0.156371	-0.939816	-0.399028	0.675834	-0.0809716	0.728409	-0.181115	0.432952	0.327607
Adur38060_comp0_c0_seq3|g.22148	-0.594859	1.14329	0.868293	-0.387283	-1.17039	-0.270454	0.287475	-0.0484109	0.977702	-0.169047	0.414744	0.260738
Adur38168_comp1_c0_seq1|g.22181	1.27992	-0.812352	-0.869717	0.879748	0.644779	-0.572261	0.379036	0.725413	-0.706632	0.162482	-0.174322	-1.16324
Adur382_comp0_c0_seq1|g.267	-0.462329	0.985706	0.987461	-0.500651	-1.0816	-0.896604	0.170423	0.704875	0.480097	-0.156048	0.271688	-0.302267
Adur38246_comp0_c0_seq1|g.22200	0.118782	-0.858012	-0.976634	0.419722	0.329331	-0.775643	1.53367	1.07799	-0.512675	1.41333	-0.501428	-0.64108
Adur38256_comp0_c0_seq1|g.22210	0.656569	-0.14932	-1.15422	0.0980447	0.922083	-0.242265	-0.148433	0.96534	-0.504998	-0.144634	-0.449196	-0.836846
Adur38280_comp1_c0_seq6|g.22225	-0.80088	-0.46859	-0.0841217	-0.77872	0.0150921	0.956359	-0.00985929	-1.07783	-0.119876	-0.471707	0.66549	1.21901
Adur38293_comp2_c0_seq1|g.22229	0.965445	-0.273744	-0.763883	0.746803	1.18941	-0.556631	-0.465285	0.0428055	0.11879	-0.151316	-0.576219	-0.33042
Adur38296_comp1_c0_seq1|g.22230	1.28846	-0.237001	-1.24956	1.1025	0.984944	-0.211509	0.35638	0.108968	-0.959168	0.503832	-0.491967	-0.888502
Adur38306_comp0_c0_seq9|g.22237	1.48524	-0.915652	-1.02177	0.974504	0.319684	-1.08628	0.575319	0.66264	-0.251129	0.745059	-0.209521	-0.905486
Adur38322_comp0_c0_seq2|g.22252	1.34066	-0.157377	-0.201728	1.54882	1.43172	0.484601	-0.618593	-1.01182	-1.03751	-0.306134	-0.854142	-0.936712
Adur3835_comp1_c0_seq3|g.2396	0.0965177	0.463946	0.329009	0.761751	-0.943823	-0.708174	0.229932	0.0253448	0.657802	0.251216	0.08457	-0.453594
Adur38361_comp1_c0_seq1|g.22269	-0.943524	1.05962	0.872686	-1.23245	-0.668183	0.485331	-0.0992606	0.184112	0.804162	-0.342316	0.115628	0.784579
Adur38388_comp0_c1_seq3|g.47834	1.21067	-0.263918	-1.12582	0.520766	0.546433	-0.444263	0.58126	1.23562	-0.930131	0.551887	-0.567294	-0.649523
Adur38397_comp0_c0_seq1|g.22284	1.54461	-0.187746	-1.00639	1.29765	0.571071	-0.744392	-0.33743	0.467349	-0.509207	0.727382	-0.767007	-0.843647
Adur38399_comp0_c0_seq1|g.22285	0.0852367	0.776435	0.198762	0.247609	-0.108057	-0.714454	0.672386	-0.684238	-0.312813	-0.175598	0.364521	-0.40492
Adur38471_comp0_c0_seq1|g.22333	-0.748703	0.921936	0.763066	-0.4484	0.250774	0.643821	-0.60078	-0.238649	-0.861905	-0.634821	0.516373	0.100284
Adur38514_comp4_c0_seq1|g.22362	1.04487	-0.768983	-0.92801	1.39919	0.961009	0.525798	0.120731	-0.489636	-1.12707	0.279409	-0.631583	-1.10248
Adur38520_comp2_c0_seq1|g.22364	0.466958	-0.564502	-0.642339	0.660903	0.691823	-0.313079	1.10741	-0.498352	-0.487686	0.978668	-0.556375	-0.634318
Adur3854_comp0_c0_seq4|g.2421	-1.21881	0.351644	0.967407	-0.485589	-0.561663	0.363597	0.114931	-0.44261	0.314379	-0.411237	0.504959	0.0557501
Adur38540_comp0_c0_seq1|g.22378	-0.475203	0.578731	0.0823046	-0.865294	-0.975946	-0.690265	0.203897	0.52295	0.677215	-0.0247497	1.09491	0.523884
Adur38547_comp0_c0_seq1|g.22385	1.15997	-0.462557	-1.24775	1.66575	0.86352	-0.47941	0.186939	0.0725602	-0.50997	0.583872	-0.657303	-1.15343
Adur3856_comp1_c0_seq2|g.2424	0.422353	-0.602883	-1.31097	0.674219	1.08968	-0.219432	0.0679554	0.891005	-0.480876	0.407862	-0.451672	-0.942592
Adur38561_comp1_c0_seq1|g.22392	1.16455	-0.46597	-0.822561	1.15653	0.8984	-0.217515	0.28705	0.113138	-0.934811	0.71907	-0.533371	-1.11437
Adur38594_comp0_c0_seq1|g.22415	0.731502	-1.25851	-0.931809	0.677575	0.349414	0.412988	-0.378213	0.527117	-0.581505	0.307613	0.185941	-0.980094
Adur38601_comp1_c0_seq13|g.22422	-1.13637	1.15662	0.860785	-1.09074	-0.582553	0.129681	0.0481987	-0.200963	0.232158	-0.357984	0.463289	0.792825
Adur3862_comp0_c0_seq1|g.2440	-0.771554	1.0433	0.686304	-0.944243	-0.816046	-0.410093	-0.0247722	0.480491	1.02171	-0.445973	0.487596	0.326903
Adur38631_comp0_c0_seq2|g.22445	0.726539	-0.471515	-0.641602	0.743321	1.50154	0.281929	-0.0589324	-0.118284	-0.835218	-0.0982857	-0.666752	-0.784826
Adur38631_comp2_c0_seq1|g.22448	0.78833	-0.693147	-0.752628	0.513642	1.88586	0.193476	-0.46861	-0.0657041	-0.509889	0.231562	-0.620235	-0.532828
Adur38681_comp2_c0_seq1|g.22474	1.11875	-0.530774	-0.87562	1.27042	1.07724	-0.00234136	0.377753	-0.320741	-1.06351	0.597937	-0.776042	-1.15938
Adur3878_comp0_c0_seq2|g.2449	0.822811	-0.351672	-0.903912	1.31672	0.88647	0.188171	0.203899	-0.298647	-0.514685	0.549781	-1.28197	-1.17739
Adur3878_comp1_c0_seq1|g.2450	0.968654	-0.42395	-0.586297	1.4582	0.984487	0.0581672	0.0504798	-0.361931	-0.791355	0.465976	-0.903779	-1.25917
Adur38829_comp0_c0_seq1|g.22549	-0.0438654	-0.355219	-0.616771	0.790522	0.306735	-0.233044	1.00674	0.82725	-0.703758	0.613998	-0.938237	-0.0761131
Adur3883_comp0_c0_seq1|g.2458	0.614825	-0.848664	-1.11316	0.937069	0.707382	-0.443817	0.564508	-0.361392	-0.822807	0.937769	-0.447274	-0.365434
Adur38882_comp0_c0_seq2|g.22569	-0.588643	1.18202	0.818989	-0.93717	-0.866034	-0.100483	-0.505137	0.0503044	0.624999	-0.367573	0.261659	0.699123
Adur38891_comp2_c0_seq1|g.22578	-0.0240588	1.66161	0.950776	-0.548476	-0.30652	0.292722	-0.965318	0.0810205	0.0637664	-0.760189	-0.0474668	0.782091
Adur38893_comp1_c1_seq1|g.22579	0.798648	-0.55708	-0.659304	1.04551	0.881129	-1.19971	0.130834	0.845449	-0.952424	0.700453	-0.287164	-1.04872
Adur39013_comp1_c0_seq1|g.22617	0.25066	-0.902273	-2.01748	0.746114	0.548098	-0.858687	0.514538	0.759119	0.12799	0.411534	0.178442	0.405492
Adur3902_comp1_c0_seq1|g.2468	-0.805322	1.25469	0.793447	-0.441835	-0.755629	-0.171171	-0.452552	0.567305	0.48842	-0.632305	0.381015	0.193708
Adur39097_comp0_c0_seq2|g.22641	0.966131	-1.00252	-0.934601	1.2601	0.891763	-0.31963	0.319341	-0.0117922	-0.553314	0.680261	-0.731848	-1.16917
Adur39110_comp0_c0_seq1|g.22644	0.910904	-0.882624	-1.10268	1.24761	0.485791	-0.528791	1.31544	0.157445	-1.01423	0.846201	-0.280611	-0.627755
Adur39110_comp0_c1_seq1|g.22646	0.917883	-1.00017	-1.43234	1.29281	0.389614	-0.444763	1.16593	-0.139246	-0.411041	0.713145	-0.231904	-0.60476
Adur39127_comp1_c0_seq3|g.47892	0.0753218	-0.553591	-1.83768	0.00428866	0.840211	-0.107767	0.397785	0.945445	-0.44145	0.214482	0.00170721	-0.529034
Adur3914_comp1_c0_seq1|g.2487	0.476586	-1.30489	-1.61821	0.33749	0.272652	-0.363025	0.377245	0.574141	-0.0193361	0.793116	0.202829	-0.444802
Adur39160_comp2_c0_seq3|g.47894	-0.948667	0.810122	0.386866	-0.993186	-0.636648	-1.00182	0.17684	-0.0146589	0.974709	0.191086	0.674276	-0.0114673
Adur39204_comp0_c0_seq1|g.22705	-0.301505	1.0344	1.14232	-0.300786	-1.33908	-0.72202	0.19807	-0.00228339	0.46184	-0.105936	0.0829414	0.751164
Adur39214_comp1_c0_seq1|g.22710	-0.0261115	1.60181	0.903124	-0.126621	-0.852825	-0.726846	0.264821	0.116593	0.34953	-0.229565	0.0161229	0.122071
Adur39244_comp2_c0_seq3|g.22741	0.973661	-0.713791	-1.01541	0.554455	0.75246	-0.16364	0.72774	0.662878	-0.565633	0.394175	-0.206261	-1.37414
Adur39301_comp0_c0_seq1|g.22784	0.91553	-1.23893	-1.34749	1.2708	0.556026	-0.323226	0.80921	-0.028438	-0.415925	0.930427	0.0901372	-1.20236
Adur3946_comp1_c0_seq1|g.44331	-0.81019	1.45	0.883946	-0.404113	-0.493923	0.360864	0.112638	-0.236776	-0.202216	-0.360351	0.0348491	-0.167856
Adur3947_comp0_c0_seq1|g.2511	-0.325978	1.38958	1.35507	0.267915	-0.307433	-0.621033	-0.410647	-0.148843	-0.11374	-0.472691	-0.16214	-0.23002
Adur39478_comp2_c0_seq7|g.47923	0.807349	-0.525576	-1.09385	1.27419	0.840431	-0.189074	0.0252331	0.072558	-0.322649	0.463099	-0.661071	-1.02335
Adur3952_comp0_c0_seq1|g.2514	-0.643411	1.09138	1.73075	0.651714	-0.0759606	0.548326	-0.475347	-1.40031	-0.0548117	-0.305463	-0.319743	-0.210219
Adur39525_comp2_c0_seq5|g.22874	-1.64552	0.674037	0.710012	-0.944056	-0.92419	0.736088	0.292241	-0.248527	0.461633	-0.106928	0.550156	1.05023
Adur39526_comp1_c0_seq1|g.22876	-0.300546	1.15952	1.40421	-0.37958	-0.728173	-0.656909	-0.0985681	-0.378419	0.627513	-0.308127	-0.00894994	0.552949
Adur39551_comp2_c0_seq1|g.22881	-0.172346	-1.24145	-0.726622	-0.762886	0.395406	1.41992	-0.0599471	0.479674	-0.663762	-0.195286	0.0850414	0.0239114
Adur39610_comp1_c0_seq1|g.22912	-0.517995	0.403861	0.267461	-0.546872	-0.756887	0.84802	0.0852606	-0.437135	0.447228	-0.075119	0.657545	0.437163
Adur39665_comp1_c0_seq1|g.22948	-0.69003	1.39833	0.951672	-0.823807	-0.882941	-0.230382	0.572091	0.0868211	0.405261	-0.369925	0.0735152	0.305134
Adur3976_comp0_c0_seq7|g.2532	-1.15683	1.12713	1.01038	-1.13931	-1.08254	-0.20807	0.301426	0.0344605	0.796035	-0.239938	0.628078	0.653364
Adur39798_comp0_c0_seq2|g.23042	-0.277693	-0.326188	-0.42283	-0.185522	0.805579	1.12921	-0.296245	-1.06715	-0.681044	-0.237129	0.458177	0.875595
Adur3980_comp0_c0_seq1|g.2535	0.958059	-1.28721	-1.11874	1.49636	0.286581	-0.40406	0.299134	-0.186495	-0.741583	0.384863	-0.163229	-0.433333
Adur39809_comp0_c0_seq1|g.23055	-0.244982	1.31315	0.771624	-0.676576	-0.802329	-0.642733	0.253506	0.561415	0.648162	-0.25875	0.168381	-0.496736
Adur39822_comp1_c0_seq2|g.23065	0.63987	-0.816541	-1.07346	0.44629	1.0215	0.0666266	0.353506	0.327993	-1.07257	0.80584	-0.578501	-0.35203
Adur39829_comp0_c0_seq2|g.23073	-0.0413043	0.425864	0.0145648	-0.833713	-0.992696	-1.06224	0.191381	0.608437	0.595104	0.153907	0.634661	0.606065
Adur39896_comp1_c0_seq1|g.23126	0.523083	-0.914142	-0.813257	0.933386	0.734746	0.27745	0.340452	-0.7957	-0.545654	0.64728	-0.613081	-0.717748
Adur39904_comp0_c0_seq1|g.23135	-0.217233	0.256898	-0.681987	0.0588188	1.12017	1.08034	-0.799604	-0.856237	-0.804351	-0.626751	0.282865	0.945373
Adur39923_comp0_c0_seq1|g.23158	1.01606	-0.749435	-1.26072	1.46814	0.967405	-0.671041	0.0343484	-0.156212	-0.69454	0.572013	-0.355085	-0.276433
Adur401_comp0_c0_seq1|g.280	-0.96098	-0.216629	0.379868	-0.658358	0.145758	0.985214	-0.779274	-1.35694	0.487968	-0.483696	0.766565	1.10087
Adur40135_comp2_c0_seq11|g.23300	-0.277395	0.657837	0.688393	-0.52411	-0.756078	-0.132251	0.119403	-0.114454	0.350994	-0.245461	0.445245	-0.471893
Adur40238_comp0_c0_seq1|g.47990	-0.382971	1.15548	1.3782	-0.521033	-0.590997	-0.297997	-0.589939	-0.2569	0.317751	-0.490433	-0.0498275	0.99299
Adur40238_comp2_c0_seq1|g.23390	-0.509637	0.951018	1.34647	-0.749877	-0.755885	-0.142105	-0.12208	-0.522368	0.434941	-0.310734	0.195473	0.714248
Adur40242_comp0_c0_seq1|g.23394	0.925743	-1.0744	-0.930378	1.59217	0.937967	-0.083506	0.374979	-0.522227	-1.08469	0.516688	-0.20791	-0.998874
Adur40277_comp0_c0_seq1|g.23419	0.722687	-0.845065	-0.613056	1.15398	0.502523	-0.315643	0.271368	-0.496478	-0.658113	0.917437	-0.528236	-0.746297
Adur40281_comp0_c0_seq1|g.23421	0.045735	-1.55758	-0.542394	-0.0771001	0.337126	-0.400966	1.08832	0.970952	-0.755713	1.09229	-0.244128	-1.03112
Adur40391_comp0_c0_seq2|g.23463	-0.202505	1.31346	1.65566	-0.588934	-0.835622	0.501616	-0.626421	-0.641773	0.141171	-0.833326	0.268633	0.198684
Adur4041_comp1_c0_seq6|g.2553	0.131495	0.163817	-0.00184822	0.287783	0.26113	0.742639	-0.575952	-1.47509	-0.70221	0.0142515	0.25438	1.00794
Adur40419_comp0_c0_seq31|g.23487	-0.998832	1.75882	1.59157	-0.63408	-0.71506	0.361591	-0.278201	-0.414108	-0.101633	-0.801638	-0.165422	0.917547
Adur40503_comp0_c0_seq2|g.23567	-0.913067	1.22197	0.282769	-0.970299	-1.11222	-0.902316	0.606034	0.664951	0.860594	0.199905	0.240295	0.263626
Adur40504_comp0_c0_seq14|g.23571	-0.0542909	1.62825	0.66925	0.0899346	-0.26289	-0.861936	0.815103	-0.366085	-0.0533347	-0.288507	-0.437682	-0.692405
Adur40537_comp0_c0_seq1|g.23596	-0.171951	-0.614874	-0.614874	0.666954	0.54917	-0.231401	1.25864	-0.269848	-0.58815	1.13198	-0.501397	-0.491067
Adur40541_comp2_c0_seq1|g.48045	0.0385173	-0.970164	-0.910932	0.640608	0.923952	-0.238203	0.477534	-0.114352	-0.708565	0.265252	-0.848094	-0.229346
Adur40542_comp0_c0_seq1|g.23602	0.0973148	0.283386	1.0106	0.0608259	-0.249456	-0.134535	0.520505	-1.08317	-0.780451	-0.0481554	0.447669	-0.36245
Adur40553_comp0_c0_seq2|g.23613	0.346266	1.32837	1.03506	0.46631	-0.392131	-0.909476	-0.365885	-0.183872	0.378363	-0.621872	-0.219297	-0.0979339
Adur40556_comp0_c0_seq3|g.23618	0.426929	0.896865	0.772337	0.854988	-0.506599	-0.85801	0.559743	-0.837424	-0.0718826	0.123328	-0.371949	0.0425113
Adur40576_comp0_c0_seq1|g.48047	1.10465	-1.06561	-0.690666	1.14614	1.1316	0.0912958	-0.10974	-0.448964	-0.634651	0.22537	-0.559293	-0.909517
Adur40618_comp1_c0_seq3|g.23685	-1.10721	-0.20273	0.989811	-0.876583	-1.04242	0.18562	0.534481	-0.446366	0.445782	-0.0102953	0.686864	0.635915
Adur40669_comp0_c0_seq8|g.23712	-0.362496	1.31006	1.01196	0.0676213	-0.688641	-0.46246	-0.440169	-0.267585	0.908562	-0.262737	0.0498354	-0.0799469
Adur40690_comp1_c0_seq2|g.23717	-0.272102	1.47055	0.84746	-0.88081	0.564469	1.11867	-1.01709	-0.693238	-0.875386	-0.807899	0.137019	0.74001
Adur40738_comp0_c0_seq1|g.23745	-0.126698	0.474771	-0.038834	0.372175	-0.725359	-0.197791	0.426671	-0.749445	0.234294	0.657492	0.428162	-0.893234
Adur40750_comp0_c0_seq1|g.23752	-0.443159	0.130638	-0.401126	-0.601989	0.625967	0.95041	-0.66588	-0.723958	-0.549183	-0.402513	0.471517	1.36636
Adur40778_comp0_c0_seq1|g.23770	0.911974	-0.635981	-1.00132	1.33625	0.0560556	-0.475716	1.04533	0.229692	-1.07939	1.00349	-0.482608	-1.12124
Adur40783_comp0_c0_seq6|g.23776	1.17602	-0.865896	-1.18364	1.26702	0.930548	0.139759	0.611846	-0.0909046	-1.26001	0.372527	-0.209571	-0.64737
Adur40797_comp1_c0_seq1|g.23785	-0.140947	1.6701	1.0207	-0.508625	-0.535268	0.222579	-0.554878	-0.412595	-0.0645859	-0.558282	0.154751	-0.0319347
Adur40804_comp0_c0_seq5|g.23790	1.26409	-0.887759	-0.922598	1.46864	0.520673	-0.192971	0.420057	0.0931207	-1.13961	0.636242	-0.562436	-0.949572
Adur40839_comp1_c0_seq1|g.23808	-0.592964	0.934868	0.557259	-0.604919	-0.645829	0.40661	-0.174797	-0.831662	0.157359	-0.821176	0.494579	1.02461
Adur4084_comp4_c0_seq1|g.44348	-0.0959886	0.745718	-0.776198	-0.589091	-0.713821	-0.996163	0.671212	0.436463	0.499067	0.739791	0.463294	0.120359
Adur40914_comp0_c1_seq1|g.23839	-0.462733	1.36922	0.111452	-0.155405	-0.924031	-0.587099	0.425448	0.0303295	0.739748	0.221794	0.0575376	0.214128
Adur40957_comp0_c0_seq1|g.23851	-0.93032	-0.423615	-0.0963069	-0.421152	-0.10899	0.921767	0.202962	-1.1165	-0.142569	0.474217	0.589897	0.985632
Adur40997_comp1_c0_seq1|g.23855	1.03006	-0.867981	-1.54991	1.1146	1.01914	-0.150809	-0.0497474	0.46215	-0.593793	0.614107	-0.305252	-0.870929
Adur41020_comp0_c0_seq1|g.23871	0.218368	0.980962	0.45661	0.461675	-0.0578386	-0.503177	0.424139	-0.442582	-0.416249	0.0625497	0.174781	-0.765377
Adur41028_comp1_c0_seq1|g.23875	-0.0413579	0.173965	-0.161611	0.149218	0.814001	1.26628	-1.24786	-1.21525	-0.693395	-0.530463	0.310963	0.709627
Adur41050_comp2_c0_seq1|g.23901	-1.01528	0.794716	1.29817	-0.826216	-1.27944	-0.210589	0.242735	-0.286285	0.791959	0.164425	0.354639	0.577673
Adur41082_comp1_c0_seq1|g.23942	-0.540871	1.07145	0.669387	-0.59927	-0.670588	-0.539677	0.240493	-0.156857	0.02849	0.0183893	0.523204	-0.121892
Adur41082_comp3_c0_seq6|g.48111	-0.668351	1.56636	0.659095	-0.797117	-0.927844	-0.300815	-0.299729	0.0890667	0.731852	-0.523739	0.465706	0.682862
Adur41087_comp0_c0_seq2|g.23952	0.167445	0.980665	0.541907	0.407528	-0.582546	-0.899093	0.361253	-0.00487359	0.453471	-0.0667338	0.13775	-0.658847
Adur41149_comp0_c0_seq1|g.23994	0.610231	1.63717	0.453877	0.524791	-0.104681	-0.751034	-0.398126	-0.609136	0.278964	0.153069	-0.180472	-0.257318
Adur41162_comp0_c0_seq2|g.23998	1.13148	-0.366888	-1.69425	0.998306	0.913098	-0.0117445	0.185322	-0.0605637	-0.745264	0.495376	-0.256171	-0.958767
Adur41166_comp0_c0_seq1|g.24003	0.120677	0.718499	1.8241	0.385916	-0.370471	-0.36587	-0.408623	-1.15449	-0.0208099	-0.242571	-0.340093	0.305058
Adur41167_comp1_c0_seq6|g.24004	-0.773574	0.176755	0.547538	-0.6288	-0.0317099	0.878499	-0.181833	-1.71636	-0.328107	-0.361663	0.868851	1.27855
Adur41192_comp0_c0_seq1|g.24025	-1.23375	1.08735	-0.124347	-0.149307	-0.297558	1.22371	0.246395	-0.455084	-0.562804	-0.346025	0.597486	0.478056
Adur41193_comp1_c1_seq1|g.24026	-0.229401	0.952354	-0.429474	-0.228039	0.238207	1.14362	0.131952	-0.935912	-0.445311	-0.124711	0.493628	0.642186
Adur41205_comp0_c0_seq1|g.24036	-0.722292	-0.0558463	-0.374751	-0.305031	-1.11157	-1.44533	0.902431	0.560135	0.582319	1.1001	0.914974	0.55457
Adur41218_comp0_c0_seq2|g.24056	-0.543737	1.13632	0.270132	-0.0525933	-0.629444	-0.386213	0.486581	-0.296386	-0.353513	0.00487866	0.226278	0.469047
Adur41221_comp0_c0_seq2|g.24057	0.619788	-0.975041	-0.850899	0.682861	0.563936	-0.100993	0.807509	-0.559619	-0.479429	0.746116	-0.563758	-0.560812
Adur41234_comp0_c0_seq29|g.24069	-0.796718	1.17461	0.967912	-0.878336	-0.898216	-0.306532	-0.354707	-0.0271666	0.72449	-0.407953	0.107213	0.765967
Adur41258_comp3_c0_seq3|g.24090	-0.0332303	-0.896535	-0.954574	-0.273527	0.684244	0.625998	0.398648	0.540206	-0.824562	0.200344	-0.193527	0.312891
Adur41278_comp0_c0_seq1|g.24111	1.05778	-0.320735	-1.21796	1.31823	1.09999	-0.572669	-0.00646365	0.270772	-0.642554	0.326801	-0.592572	-0.89906
Adur41384_comp0_c0_seq2|g.24165	0.886172	-0.578598	-0.859712	0.775879	1.20337	-0.13545	0.00777872	0.480632	-0.885498	0.305277	-0.82994	-0.621931
Adur41419_comp1_c0_seq1|g.24173	0.55403	-1.01183	-1.12334	1.06637	1.18162	0.036956	0.258596	-0.406	-0.8511	0.872831	-0.556111	-0.825115
Adur41426_comp0_c0_seq1|g.24178	1.50568	-0.375234	-0.924018	1.08267	1.01151	-0.97573	-0.0659985	0.631476	-0.559612	0.573955	-0.456398	-1.14388
Adur41446_comp0_c0_seq1|g.24200	-0.746241	1.04051	0.685878	-1.03633	-0.923883	-0.00463194	0.331988	-0.0532733	0.503276	-0.46501	0.522431	0.662628
Adur41547_comp0_c0_seq2|g.24267	-0.808757	0.78962	0.94237	-0.577582	-1.11728	0.331481	-0.443385	-0.449739	0.715722	-0.214307	0.545329	0.246418
Adur4159_comp0_c0_seq1|g.2619	1.43341	-0.7238	-0.560719	1.51302	1.12325	0.293739	-0.286183	-0.72469	-0.917536	0.180847	-0.273996	-0.732911
Adur41671_comp2_c0_seq1|g.24345	-0.163647	-0.559558	0.0128606	-0.761196	-0.102959	-0.169818	-0.474193	1.31414	0.452945	-0.139433	-0.156882	-0.0415477
Adur4170_comp1_c0_seq2|g.2621	-0.894373	1.05353	1.38055	-0.728943	-0.720297	0.480938	-0.073312	-0.910048	0.039639	-0.675452	0.232095	1.23034
Adur41710_comp2_c0_seq2|g.24357	-0.432732	0.952653	0.978855	-0.493	-0.922274	-0.745411	0.0019987	0.48681	0.851866	-0.492183	0.142387	0.317556
Adur41728_comp0_c0_seq1|g.24365	0.414341	0.603918	0.870361	0.657492	-0.416547	-0.0653931	0.122979	-1.04783	0.0570212	-0.0289575	0.0624473	-0.255768
Adur4176_comp0_c0_seq1|g.2622	-0.764834	0.536319	0.68832	0.0535412	-0.826926	-0.205037	0.19373	-0.325599	-0.0556833	-0.226314	0.390298	1.78795
Adur41846_comp2_c0_seq3|g.24433	0.993469	-0.496919	-1.23205	0.983031	1.10004	0.0516604	0.00450978	-0.094118	-0.862769	0.548997	-0.455764	-0.987635
Adur41847_comp1_c0_seq3|g.24434	1.35673	-0.762214	-0.327996	0.586854	1.30516	-0.267657	-0.622177	-0.213604	-0.595934	-0.213999	-0.548782	-0.947876
Adur41881_comp0_c0_seq1|g.24440	0.74914	0.181392	-1.26202	0.466523	0.815881	-0.188295	-0.104399	0.997502	-0.126343	0.288295	-0.475363	-1.04518
Adur41913_comp0_c0_seq1|g.48221	-0.736816	1.4843	0.723256	-0.618588	-1.00029	0.0506453	0.226211	0.072846	0.386447	-0.130789	-0.12341	0.716469
Adur41932_comp0_c0_seq13|g.24457	-0.570526	0.15726	0.494009	-0.135036	0.215571	1.21917	-0.0924839	-1.54747	-0.465211	-0.533534	0.664761	0.626446
Adur41933_comp0_c0_seq11|g.24458	0.517568	-1.27423	-0.321063	1.33614	1.00197	0.263416	0.211878	-0.652085	-0.516543	0.454031	-0.882895	-0.885131
Adur41938_comp0_c0_seq6|g.24463	0.935986	-0.119313	-1.37512	1.22668	0.754354	-0.69599	0.692113	0.64702	-0.510281	0.708096	-0.471905	-1.17299
Adur41982_comp0_c0_seq1|g.24499	-1.00991	0.798328	0.883048	-1.04393	-0.461376	0.619215	-0.151056	-0.963885	0.0813071	-0.650781	0.63374	0.648101
Adur41992_comp0_c1_seq1|g.24505	-0.581181	0.403137	1.77738	-0.346656	-0.641048	-0.120149	-0.0972917	-0.838708	0.0302165	-0.265878	0.251142	0.548494
Adur41992_comp1_c0_seq1|g.24506	-0.00983762	1.1989	1.69018	-0.0285854	-0.252742	-0.352783	-0.409411	-1.09504	-0.461725	-0.671364	0.0275037	0.646449
Adur42014_comp0_c0_seq1|g.24539	-0.333516	1.10862	0.655208	-0.468023	-0.845165	-0.0203748	-0.366287	-0.0177486	0.756747	-0.387563	0.458909	0.606561
Adur42032_comp0_c0_seq1|g.24559	0.239041	-1.31724	-1.03687	0.433872	0.508798	0.0478722	1.18235	-0.0980797	-0.786206	0.358174	0.0911168	-0.0588309
Adur42083_comp1_c0_seq1|g.24596	0.83416	-0.971975	-1.24019	1.24161	0.663499	-0.182982	0.478041	0.362735	-0.860579	0.361009	-0.330562	-0.683249
Adur42119_comp0_c0_seq1|g.24641	-0.755291	1.05487	0.168535	-0.491017	-1.47654	-0.614451	0.529077	0.404338	1.13444	-0.127271	0.419901	1.03439
Adur42134_comp1_c0_seq2|g.24653	1.38903	-0.212985	-1.03213	1.3987	1.01821	-0.116566	0.251259	-0.131693	-0.885831	0.369112	-0.809423	-1.32787
Adur42139_comp0_c0_seq1|g.24663	1.19629	-0.910837	-1.18989	1.2255	0.0814183	-0.795731	1.34239	-0.260936	-0.511563	0.467815	-0.198916	-0.567095
Adur42149_comp1_c0_seq1|g.24674	-0.446006	1.03352	0.890269	-0.935598	-0.829527	-1.06645	0.176498	0.116931	0.766476	-0.231652	0.166068	0.844817
Adur42231_comp0_c1_seq1|g.24717	-0.289134	1.00804	-0.161097	-0.556512	-0.775201	-0.0294231	0.3502	-0.758385	0.118272	0.588119	0.449299	0.200319
Adur42277_comp0_c0_seq1|g.24760	-0.202334	1.39216	0.916232	-0.266204	-0.773712	-0.809936	0.354899	0.321628	0.620259	-0.343675	0.0142427	-0.30918
Adur423_comp0_c1_seq5|g.303	-0.0837247	1.17616	0.804712	-0.292187	-0.420768	0.383351	-0.692058	-1.01487	0.390613	-0.0303782	0.439085	0.738296
Adur423_comp0_c2_seq1|g.305	0.0930532	1.03912	0.848734	-0.0637705	-0.295007	0.489006	-0.526682	-0.578212	0.275408	-0.239735	0.269677	0.75
Adur42349_comp2_c0_seq1|g.24778	1.36183	-0.589136	-1.1601	1.20003	0.359767	-0.159743	0.337522	0.342213	-0.387386	0.381313	-0.499633	-1.64767
Adur42492_comp0_c0_seq1|g.24836	-0.910669	1.27938	0.6912	-0.87835	-0.867631	0.196233	0.0807635	-0.645428	0.476651	-0.448349	0.818161	0.909122
Adur42631_comp0_c0_seq1|g.24898	1.13279	-0.648202	-1.23661	1.17726	0.905471	-0.426452	0.233223	-0.104896	-0.74558	0.309643	-0.779897	-0.450392
Adur42635_comp0_c0_seq1|g.24900	-0.496918	0.504444	1.48868	0.0475516	-0.147995	0.491816	-0.443011	-0.844534	-0.903812	-0.232455	0.342614	0.822806
Adur42637_comp2_c0_seq1|g.24902	-1.10376	1.15694	0.937251	-0.851511	-0.951342	-0.362027	0.291941	0.410413	0.833977	-0.413118	0.340286	0.337319
Adur42651_comp0_c0_seq22|g.24905	-0.998531	0.484337	0.0259072	-0.629561	-0.771195	-0.382489	1.03178	-0.556464	0.575817	0.388074	0.327379	0.757576
Adur42850_comp0_c0_seq1|g.25018	0.199877	-1.12734	-0.940892	0.513071	0.898943	0.52128	-0.0156078	0.211211	-0.997229	0.223351	-0.0725086	-0.778474
Adur42876_comp0_c0_seq1|g.25024	0.793278	-1.62025	-0.923153	0.669307	0.222959	0.136303	0.956123	0.888414	-0.977767	0.0540096	-0.23941	-0.357439
Adur42949_comp2_c0_seq3|g.25061	0.691384	-0.443302	-0.898795	1.20099	0.854139	-0.65761	0.119443	0.120633	-0.793412	0.459488	-0.628878	-0.995205
Adur42957_comp0_c0_seq2|g.25063	-0.93221	-0.0698201	0.389769	-0.168952	-0.443763	0.189027	0.720088	-0.796949	-0.390417	-0.183782	0.291926	0.616829
Adur43032_comp1_c0_seq1|g.25108	0.87288	-0.679325	-0.679325	1.35365	1.23722	-0.0439081	-0.591976	-0.456712	-0.679325	0.534593	-0.565931	-0.572855
Adur43036_comp0_c0_seq1|g.25113	0.766285	-1.02291	-0.720524	1.6081	1.26038	-0.226271	0.201575	-0.439988	-0.82671	0.0556909	-0.861418	-0.738944
Adur43070_comp0_c0_seq1|g.25131	0.124376	-0.439048	-0.692572	0.586012	1.65445	0.609273	-0.569225	-0.116986	-0.379905	0.154658	-0.4511	-0.67471
Adur43084_comp0_c0_seq1|g.25139	1.20625	-0.512422	-0.98851	0.960792	1.20972	-0.210929	0.172122	-0.107836	-0.506582	0.025421	-0.788845	-0.745618
Adur43087_comp1_c0_seq4|g.48345	0.417687	-0.487112	-0.2214	0.242723	0.634824	-0.75851	-0.0385183	2.10229	-0.413292	-0.0958902	-0.128203	-0.834932
Adur43237_comp0_c0_seq1|g.25212	0.399537	-0.620538	-0.704533	1.06357	0.463481	-0.279337	0.559927	-0.353193	-0.707768	1.13723	-0.534429	-0.577599
Adur43286_comp0_c1_seq2|g.25238	0.796538	-1.3295	-1.30897	0.879204	0.891984	0.589068	0.569526	-0.455628	-0.669711	0.287564	0.0919022	-0.575071
Adur43326_comp0_c0_seq1|g.25248	0.440859	-0.789728	-1.16656	0.220347	0.799208	-0.239161	0.455884	0.65805	-0.532076	0.858998	-0.730036	-0.668714
Adur43353_comp0_c0_seq5|g.48363	1.35619	0.0440491	-0.583236	0.644858	0.950636	-0.502208	-0.116014	0.0389875	-0.980409	1.2396	-1.00114	-0.724698
Adur43353_comp0_c0_seq9|g.25255	1.12363	-0.767232	-0.605197	0.74418	1.00939	-0.507229	-0.0449861	0.274141	-0.403979	0.457703	-0.564449	-1.0769
Adur43355_comp0_c0_seq1|g.25258	0.849995	-0.438896	-1.01046	1.18036	0.503254	-0.312159	1.21574	-0.478586	-0.89136	0.816725	-0.659385	-0.8422
Adur43424_comp0_c0_seq1|g.25296	1.04495	-0.745461	-0.762943	1.2338	0.903717	-0.410516	0.250442	-0.40829	-0.66893	1.11963	-0.739262	-0.777969
Adur43458_comp0_c0_seq6|g.25338	1.16159	-0.84677	-0.99596	0.604089	1.03674	0.00413282	-0.381994	-0.0341386	-0.297752	1.1626	-0.211907	-0.57266
Adur43483_comp0_c0_seq1|g.25353	1.0603	-0.685671	-0.648216	1.6259	0.481126	-0.257749	0.305153	-0.680308	-0.741328	0.6409	-0.712166	-0.458647
Adur43493_comp0_c0_seq1|g.25367	0.368007	-1.25481	-1.40748	-0.0509965	0.265492	-0.59808	1.38537	0.705746	-0.575729	0.99766	0.153	-0.795957
Adur43496_comp2_c0_seq1|g.48387	0.553721	-0.91631	-0.902166	0.201301	1.08862	-0.126943	0.140761	0.760694	-0.808941	0.125424	-0.497598	0.108639
Adur4350_comp2_c0_seq3|g.2678	0.792749	-0.0830689	-1.23306	1.00783	1.17906	-0.357233	0.250999	0.364133	-0.816594	0.291673	-0.448417	-0.752179
Adur43501_comp0_c1_seq1|g.25373	0.890886	-0.750347	-1.04895	1.24256	0.468301	-0.366759	0.817533	-0.0857814	-0.813805	1.12438	-0.687627	-0.651186
Adur43525_comp0_c0_seq1|g.25383	0.598084	-0.670649	-0.792162	1.21909	0.921382	0.0874457	0.241886	-0.419759	-0.792162	0.724373	-0.566936	-0.792162
Adur43535_comp0_c1_seq1|g.25391	1.34084	-0.586684	-1.05145	1.63988	0.892206	-0.559274	0.187057	-0.0803838	-0.821357	0.835777	-0.71931	-0.86682
Adur43540_comp1_c0_seq1|g.25397	-0.289472	0.262779	0.544702	0.367996	-0.891114	-0.540911	0.916359	-1.13109	0.289544	0.192854	0.287618	0.33736
Adur4356_comp0_c0_seq3|g.44379	0.948838	-0.705595	-1.18646	1.33862	0.922316	-0.511481	0.597208	-0.126291	-0.562189	0.817546	-0.637301	-0.867668
Adur43566_comp0_c0_seq1|g.25410	1.27874	-0.413278	-0.863842	1.32208	0.979162	-0.371913	0.26793	0.189049	-0.51665	0.625998	-0.590173	-1.40211
Adur43572_comp0_c0_seq2|g.25415	0.0770298	0.969112	0.792173	0.692136	-0.403776	-0.157482	-0.0762131	-0.924718	-0.27091	-0.278838	-0.0515833	0.293707
Adur43589_comp0_c1_seq1|g.25421	1.09744	-0.177263	-0.0572688	1.57971	0.959001	0.165222	-0.798798	-0.0705935	-0.797554	-0.510943	-0.838269	-0.966488
Adur43605_comp1_c0_seq1|g.25436	-0.309182	0.800517	1.25574	-0.390752	-0.13212	1.11295	-0.772928	-1.00118	-0.278216	-0.887239	-0.055883	1.06822
Adur43606_comp0_c0_seq4|g.25437	-0.750934	0.709797	1.03026	-0.756786	-0.597887	0.598665	0.127162	-0.917996	0.0130505	-0.716672	0.471353	0.71927
Adur43635_comp2_c0_seq1|g.25458	0.162313	1.03175	0.956406	0.107823	-0.572593	-0.0432235	-0.473911	-0.853014	0.0507103	0.192318	0.420138	0.00535778
Adur43664_comp1_c0_seq1|g.25482	-0.2971	0.285114	0.340864	-0.110778	-0.591904	-0.206461	1.16807	-0.422233	-0.0576061	0.487753	0.278225	-0.461981
Adur43689_comp1_c0_seq3|g.25499	-0.0461075	-0.659798	-0.659798	0.559955	0.882253	0.377992	0.590019	-0.521382	-0.609984	0.639832	-0.552089	-0.377946
Adur43737_comp0_c0_seq1|g.25527	0.884828	-0.341936	-0.774126	1.27342	0.889322	-0.513103	0.241761	0.592691	-0.783879	0.650838	-0.843191	-0.714837
Adur43791_comp0_c0_seq1|g.25557	1.31424	-0.47152	-0.907417	1.07935	0.906633	-0.1892	-0.405556	-0.0129439	-0.851201	0.549595	-0.558753	-0.693288
Adur43798_comp0_c0_seq6|g.25566	0.298688	1.67212	1.25479	-0.17493	-0.41518	-0.590462	0.0181772	-0.0470595	-0.221329	-0.85933	-0.0171882	0.0177688
Adur43829_comp2_c0_seq3|g.48424	-1.27636	-0.309496	-0.220159	-0.406307	-0.25384	0.982764	0.589404	-1.04211	-0.0236104	-0.162485	0.645131	0.704709
Adur43850_comp0_c0_seq1|g.25597	1.2029	-0.907719	-0.767859	1.24592	0.944316	-0.0972346	-0.140805	-0.0531423	-0.853478	0.537767	-0.46753	-1.03032
Adur43910_comp1_c0_seq1|g.25631	-1.2976	0.992403	0.716188	-0.819091	-0.93303	0.336634	0.344627	-0.0132608	0.643494	-0.421557	0.394701	0.486279
Adur43941_comp3_c0_seq1|g.25649	0.294565	-0.863924	-0.924818	0.602338	0.950574	0.41137	0.367202	-0.654679	-0.704586	0.794558	-0.223919	-0.495627
Adur43946_comp0_c0_seq1|g.25651	0.400535	-0.384664	-1.17837	0.185445	0.851878	-0.310023	0.457043	1.42115	-0.869921	0.781859	-0.470057	-0.665643
Adur43983_comp0_c0_seq2|g.25670	0.033985	1.04997	0.122362	0.510073	-0.0927682	-0.197682	-0.339662	-0.411978	-0.107256	-0.645741	0.399315	-0.255854
Adur44004_comp0_c0_seq1|g.25681	-0.297594	-1.27672	-1.13584	-0.331787	0.634906	-0.524639	0.582553	0.935487	-0.165693	0.828487	0.15059	-0.433508
[truncated: 2,848 more rows]

## Sheet: Fugnus_ONresistantVSsusceptable
DE_genes	R_16	R_32	R_64	S_16	S_32	S_64
[truncated: 1,022 more rows]
